# Supplementary material for: PredictSNP2: A Unified Platform for Accurately Evaluating SNP Effects by Exploiting the Different Characteristics of Variants in Distinct Genomic Regions
Source: PLoS Comput Biol. 2016 May 25;12(5):e1004962. doi: 10.1371/journal.pcbi.1004962 (PMC4880439; doi:10.1371/journal.pcbi.1004962)
Supplement: S2 Dataset — (XLSX) [file pcbi.1004962.s002.xlsx]

## Sheet: test_regulatory_deleterious
Chromosome	Position	Reference allele	Observed allele	CADD score	GWAVA score	FATHMM score	FitCons score	DANN score	FunSeq2 score
3	186530484	T	C	2.182	0.09	0.02624	0.094292	0.208566	1.2263e-30
7	142274854	G	A	1.322	0.4	0.04181	0.063197	0.149844	0.99177
10	65050659	A	G	3.05	0.15	0.09741	0.060301	0.662613	0.187741
9	8695233	T	C	6.731	0.13	0.14298	0.134018	0.842507	0.330576
1	120257576	A	G	5.594	0.27	0.07925	0.100691	0.381056	1.56838
6	31030122	T	G	3.404	0.37	0.05463	0.060301	0.79168	1.27603e-33
11	107354312	T	C	4.093	0.35	0.12751	0.063197	0.813733	0.185216
2	22568713	A	T	1.728	0.27	0.15611	0.063197	0.724059	2.6186e-14
16	53816275	C	A	11.92	0.5	0.0777	0.060301	0.615749	1.2707
6	29705659	A	G	2.412	0.31	0.04821	0.199235	0.698189	0.756114
12	111708458	A	C	8.357	0.45	0.22605	0.060301	0.862169	0.987142
9	136187163	G	T	0.113	0.17	0.08397	0.067067	0.708885	0.185214
9	98368761	T	C	21	0.73	0.98377	0.074216	0.852324	0.808001
9	28414339	A	G	0.009	0.39	0.0323	0.063197	0.339929	0.00286289
12	103483094	A	G	1.348	0.35	0.06109	0.063197	0.507831	1.9872e-62
5	150270420	A	G	9.531	0.25	0.3385	0.060301	0.899792	0.00286289
5	76046939	T	C	8.69	0.42	0.09754	0.060301	0.868543	2.76657e-43
1	159685136	A	G	2.413	0.79	0.12344	0.063197	0.566427	5.23248e-11
10	62322034	T	C	9.07	0.24	0.67518	0.063197	0.872055	0.345882
9	117545666	C	T	2.003	0.28	0.16106	0.060301	0.307457	1.33206e-62
20	16451642	A	C	0.299	0.17	0.09765	0.060301	0.39122	0.00286289
12	49474605	C	T	0.606	0.360494	0.04236	0.060301	0.407918	2.49208e-49
6	32697785	C	G	3.527	0.22	0.10145	0.060301	0.52747	1.2263e-30
16	14395432	T	C	1.554	0.3	0.11152	0.182457	0.249328	0.79723
15	79372875	A	G	1.325	0.17	0.11881	0.056003	0.742416	1.46353
11	62197427	C	A	2.908	0.3	0.08074	0.060301	0.675277	0.990282
7	44235668	G	A	13.9	0.38	0.14284	0.059349	0.876886	1.70848
3	72393141	G	C	2.141	0.39	0.05825	0.060301	0.363949	0.991738
18	43316966	T	C	2.195	0.25	0.0838	0.060301	0.734194	0.148273
3	122048644	A	G	2.43	0.4	0.16338	0.063197	0.41556	0.445452
9	136154867	G	T	1.636	0.16	0.06922	0.060301	0.340315	2.91297e-32
7	151406005	C	T	2.288	0.27	0.06518	0.067067	0.525492	0.887349
11	2831541	T	C	0.517	0.36	0.13456	0.056003	0.427325	0.626006
15	97454880	C	T	0.13	0.24	0.03506	0.063197	0.420031	1.09894e-34
20	21853100	C	T	2.073	0.37	0.1357	0.063197	0.566312	2.59166e-10
6	31837066	C	T	1.164	0.24	0.12168	0.074216	0.696621	1.10113
16	225653	A	C	3.325	0.38	0.72662	0.068936	0.415222	0.945024
6	43806609	G	A	11.59	0.41	0.31156	0.060301	0.7463	1.42002
6	32680928	T	G	1.405	0.29	0.13859	0.060301	0.27129	0
8	128320346	A	G	4.373	0.42	0.21815	0.063197	0.607008	0.201779
5	2448590	A	C	0.269	0.19	0.0363	0.063197	0.315275	1.33155e-34
4	26085511	G	A	6.724	0.34	0.3041	0.060301	0.708321	1.42002
21	40469520	A	G	19.59	0.43	0.92313	0.060301	0.918226	0.976062
13	24205195	A	G	3.013	0.36	0.38096	0.091713	0.643865	1.45447
20	34152782	C	T	6.698	0.52	0.45583	0.175069	0.845299	0.185214
19	41310571	A	G	6.722	0.39	0.13377	0.292527	0.79732	0.647909
3	135926622	G	T	9.921	0.42	0.11092	0.060301	0.581521	0.808001
5	156932376	A	C	1.065	0.19	0.0577	0.060301	0.734436	0.330576
18	24337424	C	G	21.5	0.56	0.83393	0.063197	0.752417	0.808001
1	207940853	T	A	6.887	0.41	0.14144	0.231597	0.797543	0.361897
3	87173324	G	A	1.531	0.36	0.09045	0.060301	0.705263	2.28495e-34
11	64331462	A	G	0.717	0.26	0.03118	0.060301	0.320494	0.0847532
2	83029469	C	G	2.327	0.32	0.0952	0.063197	0.65669	1.06479e-45
1	21821757	A	G	4.171	0.3	0.09301	0.078125	0.730457	0.185214
10	75421208	G	A	0.814	0.32	0.16797	0.078125	0.683969	1.30246
12	45774908	A	G	6.43	0.24	0.03866	0.121303	0.571239	0.945072
2	106440059	A	G	3.743	0.28	0.10404	0.060301	0.51819	0.686423
13	74635588	G	T	2.347	0.47	0.06749	0.060301	0.547435	0.330576
5	58184061	T	C	4.535	0.48	0.1131	0.060301	0.688689	0.185214
4	89869332	T	C	3.356	0.29	0.07508	0.060301	0.632162	1.14001
10	63779871	C	T	11.16	0.57	0.31686	0.157817	0.740615	0.956274
5	102608924	G	A	5.674	0.25	0.16149	0.060301	0.52789	0.204641
20	16455774	G	T	2.72	0.25	0.08766	0.060301	0.580432	0.18814
1	38278579	C	T	8.481	0.45	0.64148	0.175069	0.556633	0.903113
2	43587504	C	T	17.47	0.5	0.78018	0.060301	0.813231	1.04319
3	189383183	C	T	4.371	0.43	0.06632	0.063197	0.314201	0.531097
10	1156165	T	C	1.752	0.43	0.16332	0.050388	0.336032	1.25993
2	180566678	G	A	5.97	0.4	0.15282	0.063197	0.793794	0.333487
3	140370012	C	T	0.089	0.19	0.03464	0.060301	0.422183	2.91495e-40
4	9994215	C	T	2.057	0.33	0.06992	0.063197	0.604393	0.492101
9	114293634	A	G	3.363	0.14	0.05198	0.059349	0.609957	0.148273
6	160833664	C	T	3.676	0.21	0.13404	0.063197	0.525309	0.0847532
4	45184442	G	A	4.015	0.25	0.04029	0.063197	0.125653	0.622787
3	24350811	A	G	7.737	0.45	0.29834	0.063197	0.571287	1.34565
9	22098574	A	G	10.55	0.35	0.11842	0.060301	0.915565	0.991748
11	125826702	G	A	5.291	0.45	0.06811	0.060301	0.603934	0.810527
3	72509637	T	C	4.327	0.27	0.26539	0.063197	0.485629	0.185214
2	106439181	T	C	3.154	0.26	0.18366	0.060301	0.316973	0.871637
16	20555259	T	A	1.025	0.31	0.05989	0.060301	0.401545	0.0625422
6	95422618	A	T	6.885	0.39	0.23001	0.063197	0.862053	0.622647
6	117522156	C	G	0.205	0.38	0.06285	0.060301	0.368349	5.95933e-100
6	32569691	G	A	9.604	0.21	0.1013	0.056003	0.800486	1.57599e-11
22	37918472	T	C	0.53	0.32	0.04849	0.074216	0.4678	4.80399e-94
10	21830104	A	G	2.031	0.34	0.11643	0.121303	0.392786	0.531097
15	50845018	C	T	1.097	0.22	0.0998	0.059349	0.34679	0.492101
11	64464085	T	A	3.651	0.43	0.09588	0.074216	0.639878	0.226462
3	123065778	A	G	21.5	0.53	0.92084	0.060301	0.693453	1.19658
6	12927544	C	G	1.884	0.2	0.21192	0.060301	0.682182	0.531097
4	58148386	A	G	6.838	0.29	0.34344	0.060301	0.651365	0.808001
7	72904810	C	T	1.511	0.43	0.06785	0.128073	0.162594	0.57833
14	101159416	T	G	5.951	0.33	0.0803	0.134018	0.261692	0.411676
1	65979280	T	C	15.24	0.43	0.87997	0.063197	0.720007	1.65495
6	160840252	G	T	0.305	0.38	0.14744	0.063197	0.440538	0.0847532
6	31542308	T	C	1.64	0.82	0.14563	0.065574	0.549366	0.185214
10	22032942	A	G	1.828	0.38	0.17375	0.059349	0.764492	5.26391e-52
8	89588626	G	T	3.312	0.23	0.12947	0.078618	0.788751	0
5	131677997	A	G	1.988	0.21	0.15632	0.078618	0.513565	0.333008
14	61122526	C	G	7.771	0.22	0.2413	0.182457	0.49203	2.53357
16	75247245	T	G	2.103	0.28	0.05538	0.074216	0.265507	4.05598e-44
1	205244953	G	A	0.997	0.21	0.0831	0.102588	0.343387	0.99177
6	73643289	C	A	11.07	0.27	0.16061	0.063197	0.801815	0.831665
2	88895351	T	C	2.927	0.52	0.07818	0.083675	0.483057	0.796488
8	126082565	T	C	6.793	0.41	0.23911	0.128073	0.562848	0.647909
6	31505480	A	G	4.215	0.33	0.08814	0.082826	0.615297	0.547112
14	105277209	G	A	1.546	0.2	0.03174	0.060301	0.316351	5.48171e-29
13	73728139	G	T	0.355	0.18	0.03719	0.063197	0.296331	5.72408e-38
19	39731783	A	G	0.098	0.26	0.02153	0.060301	0.165426	1.41154e-38
21	16817938	G	A	2.62	0.51	0.15479	0.091966	0.639913	1.10412
9	117592638	T	C	1.812	0.36	0.14192	0.063197	0.525671	1.38831e-78
21	40465178	G	A	3.155	0.31	0.03425	0.060301	0.239964	0.185214
1	159674933	C	T	15.08	0.55	0.9942	0.063197	0.753926	0.808001
20	55116737	C	T	9.087	0.3	0.09676	0.060301	0.860476	1.0674e-15
10	76295789	A	G	4.332	0.43	0.12084	0.060301	0.762261	0.578539
10	104719096	G	A	10.37	0.29	0.28777	0.060301	0.712843	1.2707
3	56735180	C	A	6.511	0.37	0.11128	0.060301	0.484258	2.13985e-21
7	148650634	C	G	3.514	0.29	0.02472	0.060301	0.406823	7.75091e-16
8	82151747	G	A	3.876	0.36	0.10875	0.063197	0.832952	4.77531e-53
5	158826792	C	A	1.163	0.34	0.09128	0.063197	0.493225	7.9e-93
4	163333405	T	A	3.984	0.21	0.06161	0.063197	0.557308	2.51935e-30
3	27764623	A	G	8.803	0.33	0.10152	0.172434	0.645112	2.25129
14	79936964	T	C	2.053	0.33	0.12095	0.060301	0.238541	0.148273
2	43325570	A	G	5.573	0.27	0.03705	0.056003	0.451091	0.0357007
10	6102012	C	T	2.406	0.23	0.11189	0.060301	0.526418	0.781187
3	186220063	A	G	5.467	0.27	0.08693	0.063197	0.671365	3.59244e-28
4	88959922	G	C	0.754	0.16	0.14971	0.128073	0.348761	0.260237
3	113275624	A	C	0.49	0.33	0.10533	0.060301	0.516703	0.333487
11	110913240	G	A	5.173	0.32	0.14161	0.063197	0.617458	0.622475
11	23955313	T	C	0.439	0.29	0.05338	0.063197	0.505776	0.984926
6	32429719	C	A	0.585	0.27	0.06155	0.060301	0.432687	7.16672e-94
7	72977898	A	G	9.608	0.19	0.74517	0.060301	0.594245	6.63552e-41
8	17205577	T	G	7.051	0.13	0.06712	0.083675	0.501734	0.247757
1	169995802	C	T	2.409	0.44	0.04263	0.063197	0.243779	0.493601
11	68994497	T	G	1.606	0.3	0.03311	0.063197	0.675572	5.31862e-56
7	27335561	T	G	6.695	0.34	0.17802	0.063197	0.819974	2.86618e-18
7	93549596	T	A	7.046	0.26	0.22234	0.063197	0.544239	0.622787
1	151882856	C	G	2.798	0.26	0.12497	0.090647	0.688093	1.76634
6	160962503	T	C	1.615	0.24	0.06862	0.063197	0.445782	0.296164
9	6172380	A	G	5.663	0.4	0.12802	0.091713	0.627541	3.6745e-29
17	36101156	T	C	4.453	0.24	0.22551	0.091372	0.375934	0.462695
1	3691528	A	G	6.319	0.35	0.10635	0.091966	0.500176	0.800093
12	66227257	C	T	2.822	0.44	0.15073	0.121303	0.471611	0.243943
6	31362310	C	T	1.172	0.21	0.03454	0.258966	0.341144	0.636096
16	11839326	G	T	0.03	0.26	0.02542	0.060301	0.199125	0.79723
2	106438936	C	T	1.987	0.21	0.09237	0.060301	0.626019	1.48365
5	15783596	A	G	8.082	0.22	0.10286	0.083675	0.859031	0.0847532
5	44662515	C	T	13.31	0.33	0.03662	0.063197	0.827891	0.611585
1	145727683	C	T	7.274	0.71	0.25099	0.102588	0.708615	2.3787
4	123161619	A	G	1.368	0.32	0.17619	0.060301	0.673065	0.106622
11	118477367	A	G	11.73	0.54	0.18865	0.127595	0.737319	0.870543
20	23578189	G	A	3.544	0.31	0.11544	0.060301	0.698823	2.34663e-18
12	26690565	A	C	1.074	0.26	0.13653	0.063197	0.648791	0.312174
11	16559630	C	T	0.597	0.37	0.02142	0.063197	0.604108	0.313911
11	85677471	A	G	2.882	0.32	0.12691	0.083675	0.675341	0.462695
10	18419972	G	C	1.483	0.3	0.05626	0.060301	0.266152	2.88653e-13
7	40483	G	A	1.594	0.35	0.03251	0.050388	0.571291	0.185214
5	158244083	C	T	8.747	0.37	0.2576	0.060301	0.772615	1.61191
10	61413353	A	G	6.637	0.22	0.21221	0.175069	0.819009	0.0625549
5	76424949	G	A	2.676	0.26	0.11608	0.060301	0.53046	6.74291e-24
8	60132194	A	G	0.572	0.36	0.07472	0.060301	0.449442	1.14254e-80
20	5588449	A	G	3.04	0.27	0.04494	0.060301	0.629515	0.247757
15	34989851	C	A	3.812	0.34	0.0564	0.060301	0.329564	1.73724e-10
10	18727959	C	G	2.139	0.32	0.14618	0.060301	0.169642	0.106622
18	53155002	A	C	17.21	0.43	0.97778	0.060301	0.852742	1.61512
10	73591530	G	A	2.093	0.31	0.06632	0.128073	0.790475	0.616143
1	158575729	C	T	0.531	0.28	0.0558	0.060301	0.688077	1.5649e-163
2	25369002	C	T	0.02	0.35	0.08541	0.121303	0.458525	0.188077
5	60731458	G	C	17.13	0.6	0.82194	0.060301	0.668769	2.07725
6	32626130	G	A	4.711	0.3	0.12847	0.060301	0.721772	0.79723
2	42080624	T	G	1.748	0.21	0.18647	0.060301	0.7488	0.185214
19	51363398	C	T	1.742	0.34	0.08293	0.060301	0.486566	0.531097
7	50470604	T	G	8.932	0.39	0.6075	0.083675	0.73932	0.802175
2	55843413	C	T	10.36	0.18	0.17623	0.090647	0.721351	0.981702
6	6341287	A	C	2.432	0.16	0.14982	0.063197	0.771789	9.94495e-66
17	41798824	G	T	1.371	0.29	0.05097	0.074216	0.589171	0.185214
11	117531731	C	T	6.029	0.32	0.24205	0.060301	0.479309	0.770581
11	2489342	C	T	3.019	0.27	0.06375	0.121075	0.35414	0.626006
19	54792761	G	C	0.105	0.21	0.04589	0.060301	0.391811	6.20083e-38
11	48098280	G	A	13.55	0.331849	0.79068	0.060301	0.677066	1.21054
1	38633879	A	T	0.145	0.18	0.11831	0.060301	0.400188	0
5	110425063	G	C	0.186	0.21	0.08815	0.060301	0.393404	0
16	54489793	C	A	11.55	0.37	0.70922	0.060301	0.7818	1.38529e-23
17	40514201	A	G	6.484	0.42	0.06439	0.091713	0.504569	2.5118
2	624678	G	A	1.481	0.26	0.05621	0.060301	0.342894	5.08648e-31
1	120517959	G	T	1.901	0.42	0.08344	0.066767	0.706286	0.599268
11	61795586	T	G	2.922	0.38	0.06487	0.060301	0.280158	0.185214
1	61897967	G	A	8.249	0.45	0.18543	0.067067	0.757953	0.64791
9	137280939	G	A	1.786	0.26	0.08501	0.072005	0.658431	1.15534
5	171015623	T	C	5.863	0.4	0.0611	0.060301	0.842818	0.621754
10	64278682	G	A	8.687	0.24	0.25648	0.063197	0.650263	0.333487
19	17283303	T	C	1.701	0.23	0.19167	0.060301	0.354667	0.647909
4	170626552	T	C	13.47	0.38	0.2437	0.060301	0.882444	1.08548
1	94553438	C	T	6.187	0.33	0.04533	0.060301	0.735172	0.255622
16	81534790	T	C	7.02	0.41	0.14955	0.081037	0.471239	0.976706
6	32401217	C	T	0.635	0.18	0.05779	0.060301	0.707433	0.185214
20	52774427	A	G	1.507	0.18	0.21935	0.063197	0.181373	0.306886
5	78416416	C	T	9.343	0.17	0.29239	0.060301	0.755937	0.749746
6	32413459	G	A	5.92	0.34	0.06738	0.063197	0.59825	0.196416
9	4293150	A	C	0.716	0.26	0.16462	0.063197	0.609372	0.247757
5	150478318	G	A	4.828	0.39	0.13556	0.060301	0.714541	0.185214
1	78623626	C	T	0.87	0.45	0.07288	0.060301	0.672446	0.185214
4	106134316	G	A	3.24	0.32	0.09433	0.060301	0.593473	0.148273
3	138903985	G	T	0.431	0.27	0.13475	0.063197	0.324075	0.147794
12	6289219	G	A	0.993	0.38	0.04862	0.060301	0.37076	1.12448
6	20812588	G	A	2.729	0.23	0.12586	0.060301	0.632244	0.333487
22	24170996	T	G	5.35	0.19	0.12246	0.231597	0.678895	1.16479
8	19816934	T	C	2.173	0.19	0.05869	0.060301	0.462753	0.345882
14	23977010	A	G	7.408	0.26	0.12664	0.060301	0.849248	1.78826
11	57203009	C	T	0.091	0.23	0.03283	0.078618	0.869163	3.67751e-68
1	55512995	G	A	5.068	0.21	0.12033	0.072005	0.568212	0.647909
5	110859797	G	A	3.577	0.22	0.04976	0.060301	0.783067	1.94986e-33
5	74636484	C	A	2.755	0.39	0.08339	0.10224	0.532445	0.563564
14	75626042	A	C	3.428	0.37	0.30972	0.099841	0.661329	2.19117
17	68430993	G	C	1.153	0.3	0.04074	0.063197	0.476658	0.185214
3	168971231	A	G	3.683	0.3	0.16334	0.063197	0.402219	1.08548
2	88924622	T	C	1.164	0.31	0.11179	0.100949	0.342537	1.59372
14	58355048	A	G	6.414	0.5	0.23609	0.063197	0.298408	0.62565
3	124300257	C	T	9.982	0.15	0.1176	0.063197	0.916112	0.388575
5	98880299	A	G	2.868	0.36	0.12019	0.063197	0.3979	0.185214
6	160910517	T	A	4.348	0.34	0.07758	0.060301	0.341312	5.08648e-31
7	65271197	C	T	2.567	0.47	0.03739	0.060301	0.596727	7.85283e-52
6	51656388	A	G	1.291	0.18	0.06301	0.063197	0.372042	0.0625422
6	146897633	A	T	6.037	0.28	0.13965	0.063197	0.761335	3.54872e-31
6	135427159	T	C	5.867	0.38	0.16117	0.063197	0.776363	5.26391e-52
1	34189429	C	T	0.6	0.22	0.05586	0.128073	0.658794	0.147794
9	4814948	G	C	1.025	0.29	0.10039	0.081037	0.399729	0.656972
12	121160615	A	G	2.826	0.4	0.18822	0.320204	0.540266	0.269968
3	124340222	G	C	5.429	0.3	0.1604	0.060301	0.81727	0.573789
12	89328335	T	C	14.52	0.5	0.95635	0.060301	0.645442	1.42002
19	21666210	C	T	2.608	0.36	0.06676	0.068591	0.413551	0.188077
8	73236810	C	T	1.11	0.25	0.15262	0.063197	0.550208	0
18	29336591	A	G	0.387	0.24	0.0586	0.063197	0.353654	6.475e-47
2	7032618	T	C	4.36	0.31	0.14831	0.063197	0.69834	0.655775
6	16127407	C	T	5.26	0.39	0.1449	0.063197	0.759312	0.865012
13	88704706	T	C	0.018	0.18	0.03284	0.060301	0.14687	3.10321e-41
14	106232585	A	G	0.084	0.28	0.0976	0.074216	0.171732	0.185214
13	110154028	T	C	2.662	0.24	0.16431	0.060301	0.631896	4.54952e-42
11	15694462	G	A	2.439	0.3	0.04769	0.063197	0.334652	6.3788e-18
9	136137106	G	A	5.755	0.16	0.15625	0.060301	0.677267	2.85684e-09
9	10274080	G	A	3.109	0.3	0.06622	0.060301	0.343139	0.953363
11	79077193	A	G	3.095	0.29	0.09372	0.083675	0.65387	0.00286289
9	8045606	G	A	0.162	0.28	0.04293	0.063197	0.766813	0.185214
11	24741757	G	T	0.018	0.16	0.04585	0.063197	0.239566	0.00286289
19	51879034	C	T	2.406	0.16	0.07177	0.076284	0.203939	0.865012
2	239694631	C	A	0.273	0.33	0.06935	0.060301	0.0763352	1.41154e-38
8	143312933	A	C	3.323	0.23	0.06524	0.060301	0.437104	0.994596
6	32376788	C	T	5.574	0.19	0.03526	0.060301	0.21016	0.622578
2	204802578	T	C	1.793	0.24	0.15357	0.060301	0.713115	0.0625422
18	12606463	G	T	0.867	0.18	0.12524	0.060301	0.533383	0.559003
14	38683261	C	T	2.644	0.29	0.14275	0.091372	0.506083	6.30117e-21
17	76439361	G	A	3.587	0.37	0.121	0.074216	0.825958	0.978326
22	29100711	T	C	1.888	0.18	0.07322	0.125526	0.559486	0.970125
4	145650021	G	A	3.98	0.31	0.19952	0.063197	0.661004	0.107086
13	93323146	T	C	3.27	0.38	0.07037	0.063197	0.501201	0.306886
6	33204274	G	A	8.766	0.33	0.21003	0.063197	0.685908	0.185214
3	150467808	G	T	4.272	0.52	0.05781	0.060301	0.748053	0.462695
3	125906179	G	A	3.292	0.18	0.08754	0.063197	0.634295	0.0847532
4	58380322	G	A	2.406	0.36	0.06896	0.063197	0.513044	7.14138e-23
18	10447041	A	G	8.336	0.47	0.16253	0.078125	0.85082	0.185223
10	63722895	C	T	7.682	0.28	0.11501	0.060301	0.702778	0.956274
2	230522398	G	A	3.952	0.34	0.08578	0.060301	0.701384	0.148273
18	60060735	A	G	1.36	0.38	0.04191	0.060301	0.403123	2.41596e-37
19	41358624	T	C	2.376	0.41	0.06779	0.121075	0.394085	0.977478
13	110960712	A	G	9.803	0.2	0.09557	0.172434	0.41827	0.716918
17	54850329	A	G	17.4	0.43	0.8974	0.063197	0.725461	1.59826
2	102957291	A	G	10.03	0.15	0.87969	0.063197	0.494977	0.929673
3	20717929	G	A	1.005	0.34	0.05372	0.063197	0.347612	6.56908e-99
16	20364588	A	G	2.682	0.35	0.13125	0.060301	0.683941	0.881983
3	10535771	C	T	2.156	0.26	0.08715	0.060301	0.668447	0.547112
10	4809075	G	A	2.214	0.32	0.15601	0.063197	0.646089	0.865012
15	79019578	G	T	0.457	0.29	0.1248	0.134018	0.611945	0.333008
17	618965	T	C	5.172	0.45	0.26135	0.119651	0.488969	1.15913
1	79238015	T	C	12.49	0.4	0.95126	0.063197	0.536656	0.622787
1	169651044	G	A	4.162	0.15	0.02802	0.091372	0.478406	0.188077
8	90662941	T	C	2.916	0.24	0.03763	0.083675	0.577486	3.6745e-29
6	151252985	G	A	3.507	0.21	0.06054	0.128073	0.546558	0.226462
5	40401509	T	G	9.047	0.35	0.36625	0.091245	0.640354	1.42002
16	68820946	G	A	3.415	0.33	0.14856	0.091713	0.616845	1.65798
8	76615663	A	G	3.05	0.37	0.10532	0.063197	0.599255	5.29553e-93
3	38882519	T	C	1.643	0.24	0.10258	0.067067	0.804022	0.185214
11	18370898	G	C	2.53	0.28	0.02942	0.125526	0.350732	0.953946
7	107973297	A	G	5.274	0.29	0.13002	0.060301	0.610082	0.280326
12	76220618	C	T	17.3	0.42	0.84978	0.060301	0.944112	5.48171e-29
21	36357861	A	G	6.01	0.27	0.13719	0.060301	0.602221	0.679892
1	206943968	C	A	9.336	0.46	0.3577	0.078125	0.788216	2.39478
19	48371102	C	T	2.502	0.51	0.03192	0.059349	0.29205	8.55561e-31
16	86014241	T	C	2.457	0.35	0.0272	0.060301	0.422572	0.185214
8	19824492	T	C	0.61	0.24	0.11876	0.083675	0.645352	0.345882
17	33331575	C	T	7.636	0.41	0.28218	0.320204	0.748512	1.18179
15	63423739	A	G	6.364	0.46	0.14534	0.083675	0.846464	0.306886
19	46182304	T	A	8.225	0.37	0.12396	0.104817	0.744145	0.0625422
1	101407519	A	G	9.937	0.48	0.85159	0.083675	0.57733	0.247757
8	126482077	A	G	2.297	0.21	0.05861	0.060301	0.723361	4.77531e-53
2	42250549	C	T	4.343	0.45	0.03223	0.060301	0.690783	1.05987e-20
5	1322087	C	T	4.873	0.31	0.06769	0.137589	0.389762	0.148273
16	13749859	T	C	2.697	0.34	0.09233	0.063197	0.4342	7.5244e-20
4	9926967	T	G	7.445	0.24	0.04159	0.060301	0.859274	0.306886
1	36571920	G	A	1.1	0.15	0.05753	0.074216	0.468457	0.492101
17	76403984	G	A	2.681	0.26	0.1116	0.087233	0.67434	0.647909
13	114012898	C	T	0.881	0.18	0.06717	0.121303	0.504043	0.361897
7	37841534	A	G	2.154	0.25	0.02711	0.063197	0.569294	0.0625422
1	46084383	G	T	1.333	0.49	0.15809	0.320204	0.716408	1.40626
2	102613013	C	G	3.556	0.26	0.17729	0.063197	0.637547	0.547112
4	146794621	T	C	5.301	0.48	0.09846	0.059349	0.827624	0.148273
16	82650717	A	T	1.321	0.13	0.20479	0.063197	0.63905	0.185214
7	100240296	A	G	15.39	0.41	0.20587	0.134018	0.872384	2.29763
4	131133491	C	T	3.758	0.33	0.05134	0.063197	0.476357	1.70076e-25
3	23336450	C	A	4.529	0.39	0.18585	0.063197	0.447173	1.70537
2	152957411	T	C	4.661	0.31	0.14391	0.091372	0.502348	0.185214
4	102560290	A	C	2.938	0.36	0.12445	0.060301	0.758246	0.499966
2	174462854	T	A	5.678	0.47	0.09132	0.060301	0.671481	7.99512e-28
4	189120911	T	C	1.413	0.23	0.12269	0.091713	0.474857	0.185214
6	31272321	G	A	5.148	0.2	0.07118	0.063197	0.714418	1.07791e-42
6	11219030	C	T	6.516	0.52	0.26904	0.060301	0.577454	1.39071
15	68715032	A	G	4.108	0.17	0.06667	0.060301	0.392347	0.168198
19	33532300	C	T	14.34	0.64	0.3021	0.096973	0.840216	2.32937
6	32074804	T	C	12.82	0.38	0.17471	0.068591	0.856817	1.08548
7	37989095	C	T	0.686	0.21	0.08276	0.063197	0.27441	0.511471
6	13722523	G	A	2.033	0.28	0.07329	0.060301	0.474938	7.06219e-127
14	101306045	A	G	2.537	0.15	0.13183	0.087872	0.572777	0.411676
14	35832666	T	G	2.159	0.18	0.08616	0.060301	0.432299	0.79723
16	82662268	G	T	11.77	0.21	0.3078	0.104817	0.870328	0.892754
9	12396731	A	G	1.977	0.26	0.10385	0.063197	0.294004	2.01661e-29
19	19361735	G	A	3.043	0.52	0.18983	0.269202	0.566455	0.208878
19	49209010	T	C	1.005	0.3	0.02645	0.175069	0.388167	0.00286289
13	33147052	C	T	1.073	0.27	0.04929	0.060301	0.562316	9.74139e-58
3	52855229	T	C	2.8	0.57	0.16259	0.074216	0.672709	1.23756
5	153543466	A	G	0.377	0.4	0.09629	0.091713	0.208217	0.492101
2	241579108	G	T	0.871	0.3	0.03367	0.074216	0.528215	1.23501e-25
1	68635075	T	C	2.749	0.34	0.10033	0.060301	0.524217	0.00286289
3	169300219	C	T	0.015	0.32	0.03288	0.063197	0.620986	0.647909
4	57857188	A	G	3.991	0.44	0.14099	0.128073	0.380391	1.17115
16	88840462	G	A	3.945	0.39	0.06561	0.115951	0.566472	0.800093
2	202162811	A	G	1.513	0.24	0.05469	0.063197	0.515485	0.106622
5	133900513	G	T	0.462	0.09	0.1462	0.128073	0.486023	0.24632
18	52949657	T	C	2.681	0.3	0.16118	0.060301	0.508508	0.992331
14	23865885	G	A	0.131	0.47	0.06567	0.060301	0.154079	0.00286289
15	85825567	C	A	0.611	0.27	0.04736	0.060301	0.45095	0.185214
6	29723161	C	T	2.684	0.34	0.04981	0.060301	0.610968	9.74139e-58
2	31376654	G	C	1.086	0.34	0.1525	0.060301	0.449293	0.148273
5	32689718	C	G	4.021	0.08	0.07402	0.060301	0.749722	0.12696
6	133315804	T	C	3.181	0.37	0.09588	0.063197	0.636677	2.82054e-35
1	43596384	G	A	1.077	0.28	0.09575	0.060301	0.504728	9.16786e-50
5	88354675	T	C	13.19	0.36	0.89381	0.063197	0.706625	0.622787
9	137284923	G	A	3.609	0.54	0.11946	0.074216	0.53311	1.9619
21	42746081	C	T	4.297	0.13	0.10553	0.060301	0.753267	0.763545
17	61763185	T	C	5.473	0.16	0.17422	0.125526	0.558993	0.976418
16	1837406	C	T	3.324	0.26	0.12624	0.129117	0.48913	0.796488
5	110405675	A	G	4.212	0.51	0.18656	0.104817	0.728524	0.808188
8	128355618	A	G	2.582	0.23	0.16787	0.060301	0.479279	1.91499e-09
6	100760170	C	A	2.316	0.28	0.13042	0.063197	0.229139	5.69457e-36
6	16197194	G	A	2.339	0.17	0.02894	0.074216	0.300943	0.185214
3	39513278	C	T	1.687	0.29	0.07405	0.078125	0.576823	0.00286289
11	47286290	T	C	8.837	0.46	0.19054	0.083675	0.628235	3.23724
5	148904092	A	T	5.427	0.35	0.06748	0.128073	0.775826	2.6814
4	100071924	A	G	4.29	0.34	0.09258	0.063197	0.649424	0.188077
11	118549582	G	A	4.641	0.12	0.10409	0.091713	0.56425	0.260237
5	101769726	C	T	7.972	0.12	0.11709	0.066767	0.794794	0.00286289
11	128311059	G	A	0.985	0.36	0.06861	0.060301	0.280816	0
6	126759033	G	T	0.165	0.44	0.10493	0.063197	0.64863	1.66234e-109
11	27725986	T	A	20.6	0.52	0.98093	0.060301	0.807783	0.929673
6	31434111	A	G	4.792	0.19	0.07515	0.056003	0.48145	0.185214
1	231816842	C	T	18.37	0.73	0.91903	0.060301	0.683479	1.53511
4	146853165	A	G	2.04	0.29	0.02957	0.059349	0.398484	0.148273
10	113042093	T	G	5.163	0.44	0.16389	0.091245	0.661353	0.185214
6	32305979	G	T	3.009	0.17	0.04559	0.063197	0.735857	0.62565
2	169792171	C	T	2.685	0.27	0.18957	0.063197	0.631865	0.247757
5	141479065	A	C	1.12	0.31	0.04711	0.060301	0.268607	1.59671e-47
13	61513669	T	C	3.568	0.25	0.13509	0.063197	0.744015	3.82651e-06
7	94006994	C	T	3.421	0.25	0.07481	0.060301	0.407637	0.716918
2	75926565	T	C	3.082	0.22	0.067	0.121303	0.693237	0.188077
8	18272466	G	A	3.364	0.15	0.04125	0.060301	0.523472	5.01774e-18
10	54223977	A	G	8.503	0.28	0.06412	0.063197	0.819001	0.622787
8	126486409	A	G	3.836	0.22	0.12891	0.060301	0.636071	0.185214
6	118578043	G	A	1.872	0.43	0.11937	0.063197	0.398715	0.00286289
4	73645351	G	A	1.111	0.39	0.08163	0.063197	0.498525	2.13869e-44
11	2213166	C	T	1.905	0.19	0.04666	0.060301	0.260246	0.39008
2	21241505	A	G	6.585	0.39	0.18142	0.063197	0.737403	1.70661
21	44482936	C	T	4.606	0.19	0.09444	0.17184	0.527467	1.64109
9	117567013	C	T	6.561	0.52	0.52145	0.060301	0.823144	2.4688
10	17260290	A	G	0.86	0.21	0.0733	0.065499	0.288733	0.185214
18	52752017	G	A	14.95	0.34	0.65114	0.063197	0.499961	0.808001
1	12046063	G	T	0.202	0.41	0.10687	0.128073	0.714283	0.333487
1	73768366	C	A	7.463	0.26	0.2711	0.063197	0.569695	2.56499e-06
3	37604012	T	G	4.916	0.27	0.19946	0.060301	0.438581	0.862459
2	111989372	T	G	2.783	0.25	0.08857	0.067067	0.475802	0.185214
7	68611960	C	T	1	0.38	0.08439	0.060301	0.760183	8.70831e-92
6	143898894	A	G	7.62	0.24	0.22488	0.063197	0.705656	0.402643
12	57489709	T	C	6.983	0.32	0.32082	0.193828	0.624622	1.58919
9	117568766	A	G	13.4	0.74	0.83755	0.106748	0.679151	0.976308
17	7557834	C	T	1.613	0.27	0.06449	0.083675	0.37506	0.0625422
7	17309279	C	A	2.624	0.32	0.05758	0.063197	0.173845	0.185214
6	106522027	T	C	3.142	0.32	0.06626	0.060301	0.634661	4.24167e-33
21	44486964	C	T	2.699	0.1	0.07534	0.299256	0.776177	1.63724
2	34284852	A	G	3.932	0.19	0.1287	0.063197	0.381135	0.000692873
3	165480100	G	A	6.274	0.33	0.08927	0.063197	0.753554	0.185214
7	14138599	A	C	0.401	0.31	0.08801	0.063197	0.31153	6.66085e-27
13	27531267	T	C	3.049	0.38	0.06525	0.060301	0.569192	0.185214
5	6324293	A	G	3.592	0.29	0.10469	0.060301	0.729858	5.09618e-24
6	167548547	A	G	5.957	0.26	0.63844	0.063197	0.287684	0.306886
12	28017522	A	C	0.048	0.27	0.05312	0.060301	0.380587	0.185214
5	56170813	C	G	4.061	0.38	0.17728	0.137589	0.234254	0.963873
2	43553949	T	C	6.178	0.42	0.1238	0.063197	0.786236	1.60449
3	189356261	T	C	1.886	0.29	0.12028	0.063197	0.650814	1.32927
6	12903435	C	T	3.466	0.36	0.14088	0.063197	0.421907	0.345882
1	218598469	A	T	1.38	0.26	0.1201	0.063197	0.400009	0.511471
1	93148377	C	T	12.94	0.43	0.09712	0.060301	0.844209	0.373789
15	73978337	C	T	7.323	0.33	0.11468	0.119651	0.765997	0.800093
17	38166879	T	C	5.26	0.45	0.16406	0.060301	0.617163	0.807973
6	31099577	G	A	1.315	0.2	0.05303	0.091713	0.687002	0.800093
11	13293905	C	T	0.898	0.18	0.09787	0.056003	0.534493	1.29913e-91
6	34763982	C	T	5.881	0.31	0.35657	0.059349	0.541447	0.945503
1	156869047	G	T	2.845	0.17	0.16609	0.060301	0.498839	0.00286289
8	19868386	A	C	9.87	0.31	0.36028	0.063197	0.863101	2.66823e-29
4	155482743	G	A	0.737	0.41	0.12514	0.063197	0.188923	7.16672e-94
6	22140004	A	G	0.043	0.13	0.02745	0.059349	0.332121	5.78677e-166
15	28356859	C	T	4.853	0.49	0.20489	0.343423	0.776356	0.481379
1	100049785	C	A	5.676	0.35	0.16758	0.063197	0.69436	0.185214
1	98502934	G	T	0.148	0.29	0.06309	0.063197	0.498279	8.23361e-109
12	21388621	G	A	0.289	0.15	0.04224	0.063197	0.253189	0.00286289
11	92668826	C	T	4.456	0.28	0.04794	0.066767	0.451878	1.08763e-30
11	65494260	G	T	1.821	0.32	0.13045	0.067067	0.372306	0.185214
13	92988323	C	A	1.668	0.21	0.0721	0.063197	0.701172	0.306886
16	309155	C	A	7.079	0.48	0.13858	0.059349	0.665493	0.945503
15	58723426	A	G	2.833	0.12	0.08902	0.059349	0.658848	0.269968
3	51071713	T	C	2.319	0.31	0.07772	0.063197	0.545619	0.243943
11	130718630	T	G	9.384	0.31	0.04954	0.063197	0.884675	0.806968
16	52635164	G	A	3.22	0.34	0.09137	0.063197	0.434229	2.43975e-64
8	116648565	A	C	8.574	0.34	0.71817	0.060301	0.80694	0.0625422
2	215653887	T	C	2.744	0.23	0.08167	0.059349	0.800904	0.72991
1	219693220	G	A	8.341	0.4	0.18238	0.063197	0.793545	0.185214
21	40465534	G	A	2.026	0.28	0.06312	0.060301	0.69147	1.13079e-76
6	32573991	T	G	1.699	0.26	0.04279	0.060301	0.515272	9.59932e-91
15	38764843	C	T	7.669	0.39	0.21728	0.060301	0.574383	0.729408
3	119260944	A	G	5.765	0.24	0.24044	0.060301	0.748788	0.956274
3	3614887	C	T	5.568	0.38	0.15081	0.063197	0.946108	1.46835e-61
6	106435025	A	G	14.35	0.4	0.25954	0.104817	0.820801	0.185214
6	20641336	C	T	10.69	0.27	0.46004	0.060301	0.753566	0.771059
17	43925297	C	T	8.2	0.24	0.19537	0.074216	0.726425	0.808001
14	65775695	T	G	2.169	0.45	0.0858	0.060301	0.545014	0.185214
15	51048602	G	C	3.701	0.23	0.058	0.063197	0.708059	0.00286289
17	33324382	C	T	7.121	0.16	0.20609	0.137589	0.713481	0.559003
6	82794594	T	C	8.185	0.37	0.60416	0.063197	0.497279	0.808
19	45247627	A	G	8.095	0.26	0.17991	0.060301	0.81192	2.11784e-17
8	118185733	A	G	3.325	0.33	0.11063	0.063197	0.640988	0.00286289
10	65121565	C	A	4.407	0.28	0.11278	0.060301	0.310524	0.372955
5	127169212	A	G	1.58	0.19	0.11227	0.063197	0.552367	9.17039e-112
1	160852046	T	C	8.082	0.36	0.20556	0.060301	0.889903	0.677776
12	97901270	C	A	4.037	0.23	0.12892	0.068591	0.328718	3.91242e-33
17	25541278	A	C	0.234	0.37	0.03461	0.074216	0.296515	0.185214
10	81788104	T	C	13.46	0.27	0.28523	0.060301	0.95782	2.37554e-15
15	78816057	G	T	4.488	0.3	0.1484	0.060301	0.586105	0.188077
12	113607502	T	C	3.57	0.29	0.05944	0.128073	0.787147	1.67819
5	174014114	G	A	0.826	0.34	0.0474	0.063197	0.461373	2.16799e-57
1	159218266	A	C	1.357	0.41	0.03791	0.060301	0.595805	0.185214
4	89883979	C	T	2.876	0.38	0.04006	0.081037	0.569437	0.812114
8	82027672	G	T	5.11	0.43	0.08916	0.056003	0.695452	0.622787
20	34019579	C	T	0.781	0.4	0.10661	0.060301	0.370557	0.79723
11	2311152	T	G	5.934	0.24	0.09752	0.091372	0.628936	6.94589e-20
20	32729444	T	G	0.783	0.21	0.07129	0.060301	0.429464	0.185214
12	11279092	C	G	2.146	0.27	0.0345	0.060301	0.446719	0.306886
5	102725095	G	A	2.735	0.26	0.0806	0.060301	0.290431	0.185214
8	23751151	C	T	1.808	0.32	0.16873	0.060301	0.325039	1.74768e-51
3	170717521	T	A	10.73	0.35	0.19997	0.063197	0.825131	0.323375
3	33015469	G	T	3.507	0.34	0.16911	0.078125	0.518227	0.813794
11	78091150	C	A	3.889	0.69	0.03997	0.060301	0.265768	0.511471
5	141681788	G	A	6.454	0.28	0.24525	0.068591	0.647524	0.622787
8	9745798	G	A	2.99	0.24	0.17358	0.083675	0.429547	0.185214
6	87867063	T	C	1.924	0.42	0.0577	0.112256	0.489538	0.796488
11	116782974	T	G	10.77	0.41	0.45988	0.078618	0.744513	0.929673
11	2426984	G	C	1.052	0.06	0.16661	0.059349	0.600961	0.647909
17	7537792	T	C	7.315	0.4	0.44288	0.065574	0.798308	0.92419
6	29849619	G	T	0.658	0.13	0.07669	0.063197	0.275064	5.08648e-31
8	76478768	C	T	10.38	0.28	0.95245	0.063197	0.472372	0.973267
11	130273230	A	T	18.32	0.42	0.73937	0.128841	0.853862	2.12242
18	6939947	G	A	5.388	0.19	0.03841	0.060301	0.6316	0.00153992
6	29918099	G	T	1.268	0.19	0.05865	0.067067	0.325532	0.185214
8	129264589	A	G	2.403	0.3	0.14272	0.063197	0.442597	6.94781e-82
18	53200117	A	G	4.118	0.35	0.27621	0.060301	0.567057	1.80033
2	204738919	G	A	1.019	0.61	0.14674	0.074216	0.468388	0.531097
20	62409713	C	T	1.458	0.21	0.02763	0.135981	0.597858	0.143092
6	122146034	C	A	4.733	0.26	0.03556	0.060301	0.11458	0.622768
2	101668857	G	A	1.239	0.35	0.08158	0.121303	0.312774	0.260237
1	110618730	A	G	2.131	0.34	0.0797	0.091372	0.449956	2.32692e-07
5	40437948	C	T	7.561	0.39	0.47397	0.078125	0.661269	1.37556
9	107665739	G	A	6.736	0.39	0.21577	0.102588	0.420997	1.23182
5	11084712	G	A	0.507	0.45	0.09219	0.063197	0.350379	0.430929
6	5071492	C	T	0.362	0.29	0.04203	0.060301	0.633411	9.02186e-67
1	65992625	C	T	10.03	0.23	0.36593	0.091372	0.635842	2.46131
8	81268155	T	C	1.921	0.28	0.06973	0.060301	0.504313	1.65106e-29
14	88487689	C	A	2.669	0.27	0.10291	0.060301	0.614092	2.99536e-66
9	845516	A	C	16.14	0.2	0.92819	0.091372	0.857356	0.771059
4	155514879	G	A	5.037	0.35	0.12149	0.060301	0.562152	0.79723
14	98498951	A	G	3.949	0.41	0.18569	0.063197	0.795107	0.622787
17	69949016	A	G	0.438	0.3	0.08706	0.063197	0.64168	1.57857e-89
13	43116133	C	T	2.501	0.45	0.05784	0.060301	0.214364	2.14568e-53
5	175947051	C	T	4.216	0.15	0.07369	0.060301	0.591776	2.47923e-47
1	61791863	G	A	1.516	0.43	0.11756	0.060301	0.195677	0.462695
9	77499796	T	C	0.217	0.28	0.06774	0.063197	0.411308	0.247757
8	27195121	T	C	6.314	0.26	0.12842	0.060301	0.658643	2.13824
6	31142245	C	A	3.324	0.11	0.09677	0.091713	0.710363	1.04319
10	96036306	G	A	2.149	0.29	0.06416	0.060301	0.568944	0.429157
11	85867875	A	G	3.149	0.45	0.06837	0.060301	0.750997	0.185214
20	4101800	C	T	16.06	0.44	0.90164	0.060301	0.87528	0.269968
3	64705365	C	T	7.553	0.28	0.07984	0.060301	0.542831	1.66234e-109
12	103011894	A	G	5.913	0.53	0.22994	0.060301	0.710496	0.807988
16	28921809	T	C	3.105	0.42	0.11023	0.060301	0.435977	0.945503
8	19832646	G	T	2.441	0.33	0.18984	0.063197	0.689676	0.808001
8	42546711	A	G	1.83	0.25	0.06417	0.060301	0.171293	0.986312
12	20473758	C	A	10.59	0.46	0.06138	0.060301	0.857841	0.99177
10	122945086	A	G	5.126	0.34	0.29676	0.063197	0.767701	0.808001
20	42989267	G	A	6.098	0.27	0.1142	0.060301	0.686084	1.97769
1	172053287	T	C	5.884	0.41	0.1923	0.063197	0.783601	0.790984
19	49228272	T	C	7.227	0.5	0.1403	0.106651	0.746948	1.68626
21	16520832	G	A	3.306	0.32	0.13385	0.063197	0.471749	3.4941e-25
6	32573471	A	G	0.295	0.26	0.05823	0.060301	0.209687	0.185214
1	196973183	T	C	2.055	0.28	0.06307	0.060301	0.561518	0.0625422
1	118849762	G	C	18.99	0.4	0.98228	0.063197	0.704896	0.808001
9	21747803	A	G	3.235	0.25	0.07727	0.091372	0.496716	2.56499e-06
13	99111209	G	C	0.405	0.23	0.09075	0.128073	0.523464	0.929421
12	103596455	T	C	7.895	0.47	0.15486	0.063197	0.774869	0.622322
5	134366200	A	G	6.191	0.29	0.09757	0.104817	0.401346	1.63482
20	37453194	A	G	2.678	0.23	0.14041	0.060301	0.412008	0.188077
1	208128722	G	A	0.9	0.25	0.10624	0.081037	0.428507	2.76207e-112
16	68331890	G	A	5.407	0.61	0.22358	0.17184	0.603703	0.148273
2	69287943	A	G	2.352	0.26	0.10947	0.063197	0.480207	0.148273
7	28189411	T	C	4.483	0.38	0.19335	0.060301	0.529515	1.3364
2	201571143	G	A	9.031	0.32	0.41677	0.091713	0.803249	0.808001
4	149652610	C	G	6.472	0.42	0.14949	0.063197	0.73404	7.9e-93
6	160669081	A	G	4.744	0.36	0.03597	0.091966	0.580929	0.80578
10	96788561	A	G	4.152	0.31	0.08163	0.063197	0.478032	3.54872e-31
3	113370010	G	T	0.556	0.39	0.06161	0.083675	0.415333	0.148273
9	13557491	A	C	1.018	0.26	0.07365	0.060301	0.435926	3.75435e-76
16	80650805	A	G	1.041	0.21	0.09045	0.063197	0.337507	0.188077
11	64129722	G	A	2.442	0.28	0.09386	0.072005	0.722212	1.0267
1	156169610	A	G	2.188	0.35	0.17833	0.231514	0.366522	1.37556
2	21397182	G	A	2.961	0.37	0.02819	0.063197	0.21553	1.69522e-16
1	207786289	A	G	3.458	0.24	0.05749	0.048193	0.612342	0.984971
15	79080234	C	T	2.501	0.36	0.13414	0.175069	0.692082	0.0028629
6	31184196	A	G	4.219	0.24	0.04446	0.091713	0.176775	0.185214
10	81121696	T	A	7.439	0.32	0.09528	0.060301	0.656591	1.00257
6	135418635	C	T	14.75	0.46	0.68173	0.063197	0.836902	1.28916
3	170130102	C	A	6.031	0.37	0.1055	0.060301	0.78462	1.75769e-30
10	81847914	G	T	1.055	0.24	0.02221	0.060301	0.509007	0.00286289
7	106938420	A	C	1.041	0.14	0.06969	0.063197	0.705899	0.345882
15	79029723	G	A	2.215	0.17	0.03872	0.060301	0.44877	0.99177
6	43828582	T	C	1.377	0.23	0.09931	0.060301	0.478147	4.13849e-75
10	17223244	A	G	2.879	0.22	0.08986	0.065499	0.537019	0.330576
17	61966465	C	G	5.405	0.33	0.07388	0.067067	0.618416	0.185214
14	85809911	T	C	2.759	0.26	0.13238	0.063197	0.725315	0.99177
10	12307894	C	T	8.71	0.47	0.57575	0.072005	0.646163	2.28077
17	21707060	A	G	1.387	0.37	0.03742	0.063197	0.641744	4.62315e-25
6	160960359	T	C	2.662	0.27	0.0599	0.063197	0.416236	0.296164
6	16288192	G	A	0.555	0.39	0.05184	0.060301	0.642923	0.306886
5	72551134	A	G	0.583	0.31	0.08638	0.063197	0.368972	8.01692e-60
2	8442248	G	A	7.396	0.48	0.63495	0.076284	0.783686	0.79723
1	151895093	C	T	3.433	0.24	0.08571	0.060301	0.410923	0.185214
8	128517573	A	G	3.676	0.41	0.15934	0.063197	0.724367	0.185214
4	111381638	C	T	4.655	0.41	0.18737	0.060301	0.506833	0.934961
6	111424015	C	T	6.608	0.35	0.12469	0.060301	0.783954	0.00286289
20	22037575	T	C	2.36	0.21	0.05159	0.063197	0.492834	6.6663e-66
12	56412487	T	G	9.61	0.43	0.16457	0.083675	0.818509	0.313911
4	86641149	A	G	0.729	0.36	0.09265	0.063197	0.601073	0.57833
6	32577380	A	G	2.733	0.32	0.13085	0.087872	0.515397	0.79723
11	51512090	T	C	1.941	0.35	0.07719	0.063197	0.335379	9.93142e-50
7	27337867	G	T	1.449	0.33	0.13887	0.063197	0.644761	1.31477e-26
2	27743154	A	G	8.172	0.15	0.15194	0.060301	0.846856	0.860084
6	31263751	T	C	1.561	0.13	0.04177	0.063197	0.496032	5.72408e-38
7	150667210	C	T	3.143	0.35	0.05444	0.072005	0.705806	0.57833
1	89146234	C	A	4.451	0.45	0.05165	0.063197	0.270048	5.8278e-14
1	162014632	A	G	2.455	0.26	0.03631	0.060301	0.465774	0.185214
17	68976415	C	T	2.596	0.31	0.02231	0.063197	0.31927	1.57599e-11
7	44223721	G	A	3.502	0.26	0.10046	0.060301	0.530496	0.361897
8	129075832	T	C	1.663	0.31	0.05893	0.121303	0.694126	0.185214
7	73026378	C	T	1.884	0.44	0.13584	0.175069	0.615427	0.168198
3	141137035	G	A	3.802	0.28	0.0462	0.060301	0.508411	0.00286289
1	9408959	A	C	0.526	0.28	0.10531	0.074216	0.294582	0.748779
6	25818588	A	G	1.074	0.14	0.04721	0.060301	0.392346	0.208878
11	2691471	A	G	1.004	0.24	0.04755	0.060301	0.5262	0.440792
10	93348120	G	T	0.112	0.37	0.06293	0.063197	0.394834	1.59372
7	107492789	A	G	8.623	0.32	0.09837	0.060301	0.851817	5.46383e-20
5	109036066	C	T	11.92	0.45	0.30417	0.060301	0.825617	0.956274
19	39743165	T	G	12.87	0.25	0.18308	0.056003	0.900289	0.247757
22	42392811	G	A	5.501	0.6	0.10947	0.292756	0.669312	0.12696
2	106437256	C	T	3.039	0.29	0.14424	0.099841	0.484748	0.871637
2	45646824	A	G	10.68	0.37	0.57834	0.060301	0.503407	0.771059
14	103572815	A	G	4.885	0.37	0.07931	0.072005	0.823179	0.00286289
9	136142355	G	A	1.712	0.18	0.03424	0.060301	0.332143	0
17	37740161	T	C	2.029	0.41	0.05923	0.060301	0.591783	0.185214
6	475489	C	T	3.508	0.23	0.07395	0.060301	0.499388	0.185214
1	20171860	G	A	4.064	0.36	0.41151	0.059349	0.701204	0.185215
3	186454180	A	C	6.302	0.17	0.42941	0.063197	0.727808	0.549175
6	51673439	C	T	3.55	0.29	0.07474	0.063197	0.553823	0.0625422
18	19261413	C	T	4.25	0.49	0.12123	0.083675	0.589335	0.00286289
12	112168009	G	A	3.643	0.21	0.08503	0.099915	0.685722	0.306886
6	31353329	G	A	1.745	0.1	0.13223	0.083675	0.575337	0.185214
2	624034	G	C	0.997	0.16	0.06489	0.074216	0.76209	0.185214
4	175816129	T	C	2.184	0.23	0.03172	0.063197	0.585323	0.0625422
11	118611781	G	A	10.03	0.32	0.07257	0.068591	0.747607	1.16163
4	174094940	G	A	4.247	0.4	0.16802	0.097409	0.258998	0.247757
5	109221026	C	T	2.441	0.32	0.06692	0.078125	0.790503	0.991622
6	32651540	C	T	0.078	0.25	0.04341	0.063197	0.587759	3.10321e-41
2	204721752	T	C	13.77	0.34	0.40803	0.063197	0.650529	1.15253e-06
1	117104215	A	G	2.711	0.74	0.1316	0.060301	0.7302	0.333487
9	22133284	G	A	2.216	0.3	0.05322	0.063197	0.665466	0.622787
16	29967434	A	G	2.676	0.39	0.02564	0.060301	0.496099	0.00286289
4	9923004	G	T	2.307	0.31	0.06503	0.091966	0.447379	0.306886
6	32669156	T	C	0.485	0.28	0.03637	0.060301	0.341106	1.02583e-77
15	35006073	T	C	17.04	0.36	0.91229	0.060301	0.703611	8.78443e-18
8	36846109	C	T	1.474	0.27	0.03477	0.060301	0.713168	1.35361e-45
13	51105334	G	A	6.311	0.24	0.14225	0.060301	0.729329	0.463007
7	50269672	G	A	2.621	0.37	0.05614	0.067067	0.52964	0.185214
16	9935066	T	G	3.787	0.33	0.23995	0.060301	0.543007	1.3087
17	37976469	C	T	4.625	0.32	0.05992	0.060301	0.48995	0.865012
5	131770805	C	T	3.85	0.4	0.19877	0.060301	0.497535	0.800093
6	32218843	A	G	0.118	0.12	0.04153	0.060301	0.51383	5.8025e-51
2	202154397	C	G	3.018	0.49	0.14952	0.060301	0.695883	0.106622
7	38128326	T	C	0.605	0.36	0.04246	0.060301	0.654398	1.94652e-54
17	10031183	A	G	7.196	0.3	0.17645	0.155556	0.550378	1.3376
5	62586301	T	A	5.096	0.26	0.03531	0.063197	0.681346	1.17661e-14
3	117562436	C	T	5.669	0.29	0.21744	0.063197	0.419882	0.870449
15	84580156	G	A	1.328	0.18	0.03548	0.060301	0.733144	0.0847532
9	72998332	A	C	2.86	0.31	0.0737	0.063197	0.765451	4.31206e-29
2	219908369	T	G	3.734	0.42	0.16303	0.056003	0.66268	1.74768e-51
4	82165790	T	C	2.05	0.45	0.16518	0.063197	0.70709	4.12162e-27
18	12779947	G	T	3.322	0.27	0.03784	0.074216	0.699897	1.27043e-05
6	41914378	A	G	0.283	0.32	0.02184	0.060301	0.404367	0.772969
1	154814268	G	C	0.543	0.29	0.06645	0.060301	0.314389	1.13159
12	124460167	G	T	4.575	0.37	0.139	0.104817	0.66715	0.0847532
2	166583244	C	T	3.327	0.29	0.08309	0.063197	0.584597	1.1661e-26
10	81058027	A	G	1.084	0.22	0.08433	0.074216	0.467394	0.388575
6	32736695	A	T	2.583	0.14	0.15751	0.063197	0.49353	0
8	19845376	C	T	1.041	0.37	0.10769	0.063197	0.294698	0.328307
21	43836186	G	A	6.985	0.19	0.13128	0.060301	0.885599	0.394092
3	119219934	G	A	1.697	0.38	0.04936	0.121787	0.673882	0.188077
2	66772000	T	C	3.962	0.22	0.14877	0.063197	0.669681	0.540369
11	72373496	T	G	9.837	0.33	0.06278	0.060301	0.781526	0.252889
6	32678597	C	G	1.858	0.21	0.03557	0.060301	0.358127	0.185214
1	169073346	G	A	11.03	0.37	0.18469	0.056003	0.839202	0.559003
15	24152094	G	A	1.461	0.3	0.07288	0.060301	0.368033	9.26818e-31
16	11693536	G	A	3.927	0.17	0.06947	0.060301	0.614975	0.187741
8	128124916	C	A	6.016	0.34	0.10949	0.063197	0.214965	0.00341679
6	31111356	C	T	7.538	0.19	0.15229	0.108573	0.629978	0.57833
19	33527888	T	C	2.12	0.25	0.14841	0.060301	0.0574174	0.51579
2	28614794	C	T	9.37	0.37	0.38748	0.182457	0.921915	1.15138
8	145021167	C	G	8.105	0.35	0.2316	0.123371	0.522245	1.05698
13	94011169	A	G	2.421	0.27	0.10004	0.060301	0.693264	1.10412
17	59239221	A	G	13.75	0.37	0.27399	0.060301	0.634776	1.06282
11	116657561	C	T	9.492	0.35	0.26599	0.112256	0.708605	2.02272
5	96290647	C	T	0.48	0.1	0.03074	0.063197	0.795887	0.306886
3	49719729	G	A	5.027	0.51	0.22	0.17184	0.763154	0.462695
14	88472595	C	T	0.516	0.28	0.10366	0.063197	0.645458	0.800093
16	67225501	C	T	8.101	0.37	0.11054	0.125351	0.608917	0.79723
4	81184341	A	T	10.13	0.47	0.31616	0.104817	0.823025	0.622787
2	102726661	A	G	5.081	0.16	0.04566	0.060301	0.442106	0.471758
8	4180844	C	A	0.913	0.16	0.02313	0.060301	0.345345	0.0625422
6	117871836	G	A	12.5	0.32	0.20144	0.074216	0.862757	0.834929
9	97713459	C	A	10.24	0.58	0.43096	0.091713	0.736982	0.990951
12	123640853	C	G	6.345	0.47	0.10792	0.083675	0.48412	0.729408
10	318076	G	A	3.147	0.24	0.08482	0.060301	0.664821	8.46759e-27
11	95866700	G	C	0.825	0.4	0.13302	0.060301	0.435541	0.57833
5	52193125	A	G	6.315	0.32	0.21297	0.078618	0.77953	1.22522
17	7552123	C	T	3.069	0.24	0.11431	0.091372	0.374503	0.247757
2	60718043	T	G	19.25	0.51	0.82499	0.060301	0.846908	1.775
10	18734528	G	A	1.973	0.27	0.13528	0.063197	0.742492	0.106622
1	230295691	G	A	4.987	0.25	0.13634	0.091713	0.695687	0.333487
6	32576795	C	T	1.655	0.2	0.08192	0.060301	0.825971	0.185214
2	164490529	A	T	3.001	0.26	0.06154	0.078618	0.33296	0.0028629
5	159007778	C	A	2.657	0.41	0.17677	0.060301	0.175278	1.297e-13
1	152493154	G	A	4.889	0.3	0.05259	0.063197	0.608087	0.185214
2	232988582	A	C	2.404	0.22	0.13971	0.060301	0.783628	0.148273
11	18632984	T	C	9.804	0.35	0.19021	0.121303	0.84114	0.247757
19	51393118	A	G	6.068	0.37	0.12628	0.063197	0.787915	0.185214
6	162001436	T	C	2.788	0.43	0.03556	0.063197	0.450665	0.753894
4	103551603	A	G	1.886	0.12	0.05532	0.060301	0.443943	1.57857e-89
19	8281635	G	A	3.322	0.27	0.03609	0.17184	0.588049	0.188077
6	106188818	C	T	13.73	0.51	0.86022	0.060301	0.434848	0.808001
1	219775432	A	G	1.932	0.38	0.05173	0.063197	0.680419	1.12771e-44
7	127164958	A	G	0.502	0.2	0.05538	0.091372	0.537124	1.91813e-87
17	16845167	A	G	1.486	0.2	0.1161	0.060301	0.587977	0.981702
8	24044301	C	T	0.879	0.35	0.09622	0.060301	0.420402	0.973796
8	86268313	A	G	4.423	0.2	0.04727	0.063197	0.761957	0.306886
11	8252853	A	G	3.775	0.14	0.0654	0.074216	0.38409	0.573789
2	220028900	A	G	2.633	0.25	0.03963	0.121303	0.440491	0.281668
16	57002732	T	G	1.419	0.23	0.03322	0.063197	0.250569	0.353412
1	199007208	C	T	1.556	0.34	0.051	0.063197	0.215265	3.6745e-29
8	24116304	C	T	3.263	0.36	0.08998	0.063197	0.463039	3.47135e-07
16	19935389	G	A	9.377	0.42	0.11559	0.060301	0.807547	6.04753e-67
19	50091199	T	G	3.689	0.24	0.07201	0.083675	0.459992	0.306886
6	106667535	T	G	5.607	0.24	0.11235	0.060301	0.646356	0.776152
6	109783941	A	G	6.876	0.39	0.06278	0.343423	0.341514	0.956274
8	135566567	C	T	7.401	0.26	0.16189	0.063197	0.764667	0.62551
4	17797966	G	A	4.551	0.21	0.0406	0.060301	0.434667	0.615233
16	7459683	G	C	3.966	0.29	0.21855	0.060301	0.64311	0.430929
8	111485761	A	G	12.82	0.44	0.49509	0.063197	0.911246	7.41868e-30
8	145005561	T	C	2.641	0.17	0.08776	0.129117	0.277671	1.02128
1	172346548	G	A	4.699	0.29	0.12499	0.063197	0.654404	0.580206
20	34712310	T	C	3.192	0.3	0.07039	0.060301	0.657729	0.440792
1	159326880	A	G	1.936	0.38	0.06464	0.063197	0.528098	1.75769e-30
6	44946506	T	A	5.028	0.31	0.13171	0.063197	0.715759	0.903521
10	25216806	C	T	0.447	0.23	0.06705	0.060301	0.545794	0.280326
8	128103937	T	C	4.446	0.27	0.13478	0.063197	0.8051	0.0022945
18	24570667	T	G	4.774	0.49	0.10541	0.063197	0.643047	0.00286289
4	90637601	G	A	5.559	0.32	0.02782	0.063197	0.185264	0.622787
10	49699957	C	T	3.798	0.13	0.1094	0.060301	0.71189	0.306886
7	150512172	T	C	2.053	0.38	0.11116	0.115951	0.612024	0.974329
3	186551711	A	C	0.767	0.31	0.05592	0.060301	0.511901	3.75128e-37
1	222164948	A	G	5.33	0.38	0.17228	0.063197	0.848118	0.622787
18	53210302	G	T	0.941	0.42	0.09253	0.060301	0.27911	1.17754
1	207803595	G	A	1.65	0.19	0.12004	0.060301	0.573504	1.15685
1	201262432	C	T	7.102	0.32	0.32434	0.060301	0.702438	0.187741
2	211616894	A	G	17.76	0.5	0.91262	0.060301	0.823959	6.42409e-13
4	17815889	C	G	3.876	0.44	0.11337	0.078125	0.556587	0.931831
14	68699594	C	T	22.4	0.48	0.94517	0.126568	0.963271	3.38376
8	144565905	A	G	3.499	0.28	0.04476	0.074216	0.515093	0.148273
17	40507980	A	C	0.684	0.38	0.12269	0.060301	0.726215	1.9809
16	15148646	C	A	8.88	0.44	0.13877	0.10224	0.803922	1.25993
1	112192122	T	C	3.479	0.23	0.05042	0.099841	0.383586	0.951394
8	117630683	A	C	20.8	0.44	0.95535	0.063197	0.745458	0.808001
2	235302810	C	T	0.96	0.28	0.06426	0.063197	0.505644	7.7383e-85
15	99194896	C	G	8.224	0.32	0.16626	0.119651	0.402219	2.78881
3	46281744	C	T	2.721	0.25	0.10336	0.060301	0.453361	0.450881
2	241563739	G	A	0.083	0.37	0.07793	0.074216	0.557504	0.993302
22	51017353	T	C	6.832	0.23	0.05135	0.129117	0.797214	0.756114
2	182319301	C	T	6.698	0.41	0.06397	0.063197	0.702259	1.70447e-80
1	8495945	T	C	5.868	0.38	0.21368	0.081037	0.613065	0.707846
6	221146	G	A	3.823	0.47	0.15371	0.091713	0.580396	1.789
6	135427144	C	A	1.503	0.49	0.14512	0.063197	0.286978	2.13637e-90
4	55407762	C	G	1.398	0.37	0.14607	0.060301	0.487927	0.185214
4	187174683	A	G	0.93	0.17	0.03961	0.068591	0.659717	0.330576
4	10727357	T	C	2.287	0.17	0.05488	0.063197	0.298354	4.53469e-33
10	104698978	T	C	1.733	0.35	0.13269	0.083675	0.460135	1.45033
10	50042951	A	G	6.533	0.15	0.05799	0.060301	0.335253	0.148273
12	102630679	C	A	4.924	0.47	0.02844	0.063197	0.464068	0.983302
7	23293746	A	G	4.813	0.2	0.16461	0.060301	0.513105	0.269968
12	131456449	G	A	0.239	0.19	0.09603	0.060301	0.629352	0.333487
5	78745042	T	C	0.123	0.31	0.11296	0.121303	0.471246	0.462695
11	61663691	G	A	3.809	0.31	0.14523	0.060301	0.429403	1.415e-08
9	33139453	C	T	7.603	0.39	0.21341	0.060301	0.530893	1.2707
10	132168065	C	T	0.933	0.35	0.07352	0.060301	0.779193	1.54206e-49
9	100549013	A	G	15.62	0.39	0.25111	0.135981	0.773458	3.86631e-10
1	11862778	A	G	1.304	0.4	0.06858	0.097409	0.438556	1.70661
18	20724328	G	A	0.035	0.37	0.05609	0.087233	0.363636	0.51579
10	114754071	T	C	1.059	0.28	0.11204	0.068591	0.48065	0.734389
13	99956622	T	C	0.131	0.29	0.08944	0.060301	0.30081	0.291836
15	80910857	C	T	3.629	0.35	0.13427	0.060301	0.671189	0.185214
5	76521868	T	C	3.676	0.3	0.05115	0.060301	0.819619	0.255622
5	131741696	A	G	1.738	0.32	0.07395	0.060301	0.471977	7.05447e-26
1	207930203	G	A	3.505	0.26	0.04962	0.082826	0.277343	0.547112
15	97607681	C	A	2.036	0.25	0.045	0.063197	0.451039	1.75769e-30
5	6821914	G	A	1.099	0.24	0.09251	0.060301	0.552404	0.185214
10	8104208	C	A	2.372	0.27	0.21051	0.127595	0.497368	1.12448
9	94927735	A	G	1.488	0.3	0.23825	0.060301	0.29464	0.185214
7	106359216	C	T	5.593	0.28	0.09218	0.060301	0.644276	0.188077
1	176684432	A	G	3.217	0.23	0.06544	0.063197	0.443901	0.187741
15	99258710	A	T	1.913	0.25	0.13268	0.097409	0.449045	0.999933
2	146125523	C	T	3.221	0.2	0.06822	0.063197	0.192627	5.24674e-43
6	135432552	T	C	3.094	0.35	0.09311	0.063197	0.340903	7.26684e-22
6	29973925	C	T	7.757	0.35	0.06715	0.215285	0.647113	0.185214
15	49735297	T	C	2.802	0.31	0.04466	0.063197	0.728348	0.402643
6	159506600	C	T	4.818	0.3	0.06214	0.060301	0.634849	7.00854e-08
12	124203832	G	A	5.187	0.25	0.08445	0.125526	0.49941	0.247757
5	58676049	A	G	9.321	0.33	0.17683	0.063197	0.882883	0.313911
2	101424331	G	A	4.639	0.34	0.12816	0.060301	0.336737	0.185214
14	65758642	G	A	6.567	0.35	0.10151	0.060301	0.629761	0.185214
6	32413545	G	A	1.943	0.27	0.06699	0.063197	0.272585	0.185214
7	2763102	C	T	3.207	0.23	0.06998	0.320204	0.515987	0.00286289
2	102971865	G	T	2.172	0.24	0.07161	0.125351	0.440963	0.312174
1	93009438	C	A	5.517	0.43	0.04957	0.060301	0.673961	0.559003
10	104612335	T	A	0.614	0.38	0.04423	0.060301	0.657694	5.54322e-72
17	32593665	A	G	11.88	0.37	0.10937	0.063197	0.872187	0.980931
3	128297569	G	C	0.91	0.38	0.11285	0.091713	0.579545	7.1375e-46
4	939087	C	T	1.634	0.34	0.05018	0.125351	0.452129	0.188077
8	121610438	G	A	7.091	0.35	0.11039	0.060301	0.730159	0.647909
6	152358179	T	C	10.7	0.3	0.93209	0.063197	0.731989	1.5041
10	13155726	T	C	3.104	0.31	0.14253	0.074216	0.294219	0.531097
5	39979172	C	T	7.365	0.39	0.05296	0.060301	0.793166	8.42393e-25
6	32428285	C	T	4.114	0.28	0.05403	0.063197	0.657724	0.185214
9	89116628	G	C	0.473	0.23	0.02933	0.063197	0.323908	5.48171e-29
2	25036858	C	A	5	0.28	0.12574	0.231514	0.486453	0.984282
6	6337506	C	T	4.229	0.35	0.14785	0.063197	0.482244	4.77531e-53
1	2387101	C	T	3.548	0.23	0.04395	0.074216	0.333075	1.12752
6	396321	C	T	13.7	0.33	0.26795	0.056003	0.741913	1.72143
2	83292565	T	C	3.148	0.36	0.03532	0.060301	0.722643	1.55978e-07
1	219753509	T	C	11.48	0.43	0.89759	0.063197	0.575834	0.991812
3	119227247	G	A	1.119	0.29	0.10706	0.125526	0.521545	0.247757
1	10286176	G	A	4.827	0.38	0.11531	0.083675	0.510112	0.865012
6	31265490	T	C	1.042	0.25	0.03274	0.063197	0.177676	1.0835e-44
12	66371880	G	T	12.36	0.37	0.90577	0.063197	0.39379	0.622787
10	104594507	A	G	3.932	0.4	0.17545	0.078125	0.67177	0.269968
8	118185025	G	A	4.091	0.43	0.20888	0.063197	0.281162	0.62565
13	78381146	G	T	0.912	0.43	0.18544	0.063197	0.56696	2.21871e-35
5	137707315	G	A	8.017	0.47	0.2892	0.135981	0.431171	1.11489
15	95270467	C	T	7.167	0.38	0.07427	0.060301	0.450207	0.622787
11	72432985	G	A	4.736	0.33	0.14324	0.126568	0.696171	0.353412
14	68520906	G	A	5.962	0.28	0.06148	0.063197	0.680457	0.188077
3	38599037	G	A	12.18	0.23	0.0859	0.063197	0.830941	0.330576
7	100015457	C	T	0.62	0.36	0.08858	0.063197	0.419797	0.763545
15	73652174	A	G	6.275	0.37	0.20064	0.081037	0.727547	1.16833
11	1093945	T	C	0.189	0.18	0.02109	0.074216	0.253741	0.12696
15	32927476	C	T	5.93	0.35	0.08226	0.137589	0.514651	0.247757
6	150358012	T	C	3.859	0.21	0.09893	0.104817	0.47212	0.185214
6	51674161	T	C	0.176	0.26	0.03857	0.063197	0.483914	0.0625422
19	33906123	T	C	0.571	0.26	0.04509	0.074216	0.201853	1.35339
3	38774832	C	T	1.08	0.27	0.04179	0.060301	0.389861	0.450881
4	55092626	T	C	9.825	0.34	0.11573	0.182457	0.594375	1.04875
1	165394882	T	C	6.944	0.43	0.05307	0.063197	0.722724	1.40145
6	31366595	C	T	1.126	0.4	0.04497	0.121075	0.603777	0.985673
4	106808107	G	A	0.696	0.2	0.08935	0.063197	0.853124	0.148273
20	57824309	A	G	0.019	0.4	0.02244	0.060301	0.307252	0.00286289
3	87525449	C	A	8.469	0.48	0.24599	0.063197	0.829737	2.32692e-07
22	37534034	G	A	0.982	0.26	0.07808	0.060301	0.403143	1.0349
2	61217542	T	C	0.531	0.29	0.02692	0.060301	0.430083	0.679798
5	131714409	C	T	8.661	0.38	0.17744	0.083675	0.381558	1.11489
6	32432077	G	C	0.564	0.25	0.07138	0.060301	0.584671	5.26391e-52
13	23294033	C	T	1.896	0.18	0.04326	0.060301	0.0966986	3.54872e-31
1	209988047	A	C	0.768	0.3	0.19549	0.067067	0.689759	0.185214
1	159691559	G	A	1.617	0.5	0.08392	0.063197	0.54315	3.23426e-57
7	52006415	T	C	1.037	0.3	0.06658	0.063197	0.700019	3.517e-43
15	75077367	C	A	7.761	0.23	0.18351	0.083675	0.459811	2.28686
4	77410318	C	A	1.599	0.41	0.14027	0.060301	0.610189	0.445452
9	136142217	T	G	0.607	0.14	0.03903	0.060301	0.41348	1.32591e-37
1	199798339	G	A	2.583	0.44	0.10893	0.060301	0.707279	7.57991e-77
3	119118796	T	G	8.865	0.26	0.253	0.083675	0.803106	1.71652
12	129300694	C	T	0.127	0.37	0.07538	0.081037	0.653505	1.47703
19	49136651	G	A	2.523	0.34	0.16413	0.059349	0.486748	1.47703
8	129194641	C	T	3.48	0.42	0.12112	0.063197	0.734828	0.185214
17	29247715	G	A	3.398	0.39	0.09172	0.048193	0.230255	0.859772
1	41688938	C	T	0.768	0.3	0.02661	0.060301	0.577254	0.554527
6	151895456	G	C	0.039	0.22	0.03838	0.060301	0.582986	0.00286289
3	169579971	G	A	0.613	0.2	0.10472	0.134018	0.808709	1.29791
11	104334239	A	G	0.699	0.35	0.06767	0.063197	0.73455	5.43866e-142
3	141102833	G	A	8.132	0.41	0.13994	0.060301	0.504723	0.810864
12	88953959	G	A	5.27	0.22	0.22361	0.091713	0.538046	0.831665
2	60719970	C	A	4.598	0.41	0.1122	0.060301	0.392316	1.4636
17	38128648	C	T	5.458	0.5	0.14943	0.056003	0.775893	0.994633
8	117574515	C	G	8.819	0.28	0.18813	0.063197	0.713666	8.52771e-22
3	38770639	C	G	0.786	0.24	0.12799	0.060301	0.390968	0.450881
11	61417472	G	A	1.318	0.32	0.05474	0.060301	0.578953	0.185214
11	26346831	T	C	7.995	0.36	0.21031	0.060301	0.675837	0.00286289
18	12809340	A	G	10.97	0.38	0.089	0.060301	0.863966	0.482556
8	9183358	A	G	2.918	0.33	0.10934	0.063197	0.577372	0.185214
6	105180785	C	T	3.891	0.24	0.05373	0.060301	0.515212	0.0625422
16	50719103	T	C	1.905	0.36	0.20762	0.060301	0.570198	0.984971
2	199523122	C	T	20.9	0.48	0.99039	0.063197	0.768867	0.622787
4	40303633	G	T	2.117	0.45	0.09083	0.060301	0.357807	1.11114
15	78806023	T	C	1.613	0.34	0.13812	0.056003	0.349653	0.00286289
11	102070639	A	G	6.47	0.23	0.19094	0.091713	0.788858	0.609034
6	152068364	G	A	7.278	0.27	0.18832	0.063197	0.667334	1.64978
1	243555105	G	A	2.811	0.36	0.0938	0.091713	0.620798	0.306886
12	94235165	A	G	2.4	0.38	0.09767	0.121303	0.577079	0.345882
2	102953617	G	T	1.924	0.52	0.19043	0.081037	0.715276	1.29864
10	123033549	G	A	1.522	0.32	0.05111	0.060301	0.193718	3.39661e-45
19	5834212	C	T	1.273	0.16	0.05785	0.074216	0.387637	0.0625422
9	114301585	C	T	0.681	0.19	0.06083	0.121303	0.36996	0.148273
14	95012384	A	G	1.197	0.37	0.06821	0.060301	0.411561	3.20099e-53
5	56031884	C	A	21	0.72	0.8039	0.060301	0.785217	2.75219
19	7739177	T	C	1.386	0.46	0.12182	0.074216	0.52488	0.981702
14	23002684	T	G	6.136	0.45	0.51375	0.063197	0.691096	0.808001
6	27248931	T	C	1.732	0.31	0.1498	0.112256	0.340809	0.185214
4	4648047	C	T	6.839	0.47	0.17095	0.083675	0.772481	0.185214
9	111809295	A	C	8.242	0.31	0.58782	0.121303	0.900421	0.0028629
4	89039082	A	G	3.841	0.33	0.16338	0.060301	0.680629	0.187741
13	40368069	C	T	0.564	0.34	0.06907	0.060301	0.442596	0.185214
10	14008445	G	A	8.265	0.16	0.04857	0.060301	0.859939	0.0847532
7	100214015	A	G	1.172	0.28	0.04088	0.060301	0.635623	3.26787e-61
3	186570453	G	A	6.938	0.37	0.30464	0.060301	0.609132	0.956274
6	31016978	C	A	2.193	0.2	0.09499	0.060301	0.548265	1.3448e-27
10	80841148	T	C	3.991	0.31	0.12864	0.135981	0.643417	0.573789
19	49208865	G	A	2.404	0.32	0.03552	0.175069	0.725746	0.188077
6	142703877	G	A	7.622	0.38	0.10103	0.060301	0.334898	0.57833
3	86850618	A	G	2.269	0.19	0.08752	0.063197	0.451912	1.73961e-26
16	73051620	C	T	6.398	0.28	0.16746	0.060301	0.389691	1.30258
11	8639994	G	C	2.026	0.57	0.1727	0.078618	0.465998	0.0028629
11	14915310	A	G	1.957	0.36	0.09736	0.060301	0.363447	0.188077
6	126781434	C	T	1.546	0.41	0.08406	0.063197	0.451991	5.16599e-37
4	17877487	A	G	2.413	0.42	0.36523	0.063197	0.659007	0.480423
18	57849023	G	A	10.46	0.19	0.27699	0.060301	0.861009	1.14815e-20
1	98501984	T	C	0.13	0.3	0.10241	0.063197	0.531833	5.81201e-129
10	101291593	T	C	9.968	0.29	0.11784	0.104817	0.801018	0.185214
7	139506580	C	T	3.065	0.34	0.09117	0.063197	0.514973	0.333487
5	108948937	C	T	0.814	0.33	0.07779	0.063197	0.523516	1.9098e-124
15	79141784	T	C	1.166	0.25	0.03042	0.083675	0.605622	1.04042
17	8136092	C	T	6.83	0.43	0.17526	0.231514	0.6185	0.188077
6	32603007	A	G	0.295	0.28	0.15021	0.063197	0.382669	0.492101
1	152551276	A	G	0.283	0.27	0.03472	0.063197	0.427443	1.38831e-78
16	50103734	C	T	3.499	0.37	0.05263	0.137589	0.467152	0.148273
16	4038387	G	A	5.283	0.25	0.2079	0.074216	0.759989	0.269968
11	60760612	C	G	13.74	0.47	0.2911	0.060301	0.749937	1.27976
15	80432222	A	G	8.765	0.31	0.08631	0.059349	0.787873	1.7842e-59
3	30753573	A	G	2.778	0.26	0.2036	0.060301	0.820595	0.185214
19	50926742	A	G	4.505	0.22	0.06672	0.072005	0.343781	0.547112
7	72971231	C	T	8.416	0.15	0.11231	0.064036	0.774222	1.91378
12	114802138	A	G	1.713	0.17	0.11177	0.060301	0.467633	0.462695
7	2004421	C	T	2.395	0.31	0.08855	0.060301	0.534984	0.866334
13	50306221	G	C	13.01	0.44	0.08958	0.060301	0.744816	1.67871
5	172939426	C	T	2.167	0.3	0.09588	0.091713	0.397712	1.60063e-17
19	49206172	C	T	1.607	0.17	0.08311	0.083675	0.773186	0.00286289
6	45244415	T	C	6.243	0.39	0.18017	0.060301	0.770148	1.52631
1	145723645	T	C	14.92	0.69	0.87251	0.060301	0.790675	2.40754
13	41109429	A	C	6.07	0.31	0.11263	0.060301	0.638718	3.38554e-36
6	32379736	G	A	6.92	0.32	0.14355	0.060301	0.793629	1.74768e-51
11	589564	T	C	2.665	0.25	0.10723	0.128073	0.58153	0.148273
10	96405502	G	A	1.295	0.31	0.04352	0.060301	0.263238	0.185214
5	74648603	A	T	4.148	0.45	0.03323	0.12342	0.729951	0.563564
14	98488007	G	T	1.065	0.4	0.063	0.060301	0.595012	4.03726e-19
19	48372195	C	T	0.077	0.39	0.03319	0.077002	0.574482	0.79723
6	167383075	G	A	4.325	0.32	0.16928	0.083675	0.561488	0.185214
6	130349119	C	T	3.128	0.3	0.14598	0.060301	0.548151	0.143186
1	214618185	C	T	3.298	0.23	0.07743	0.059349	0.603061	0.984971
2	227105921	C	T	1.915	0.26	0.06091	0.063197	0.382173	5.08648e-31
18	20672555	T	G	0.586	0.33	0.06225	0.060301	0.382147	8.61167e-49
18	57852948	A	C	1.866	0.24	0.03999	0.060301	0.319656	6.60489e-16
5	36423931	G	T	0.111	0.33	0.08547	0.063197	0.732367	0.945503
15	70018990	A	G	3.702	0.32	0.04665	0.060301	0.374289	0.978619
10	60265404	A	G	6.161	0.23	0.11194	0.063197	0.720423	3.20099e-53
8	57209246	A	G	4.647	0.34	0.02787	0.060301	0.848318	1.7553e-14
15	74305966	C	T	4.255	0.28	0.19294	0.060301	0.354627	0.994682
2	173311553	A	G	3.874	0.38	0.18823	0.083675	0.659612	1.57197
4	155483914	C	T	3.302	0.31	0.14281	0.063197	0.489548	0.587857
19	41860296	A	G	6.284	0.79	0.08547	0.119651	0.483087	2.00185
1	76135946	A	G	0.655	0.29	0.06376	0.063197	0.600062	1.20842e-63
6	32408527	C	G	2.093	0.27	0.21164	0.063197	0.370641	1.25993
8	128125195	C	T	3.672	0.38	0.11625	0.063197	0.649793	2.50159e-35
6	32019746	G	C	0.915	0.18	0.07311	0.083675	0.574803	0.0625422
13	27920611	T	C	3.289	0.35	0.03606	0.060301	0.575234	2.56499e-06
17	27917771	A	G	22.1	0.46	0.79813	0.215285	0.802391	2.26696
5	122504566	T	C	2.385	0.38	0.10802	0.060301	0.380599	0.492101
6	152110943	T	G	2.528	0.15	0.07774	0.063197	0.470637	0.985935
3	58331186	G	A	5.87	0.29	0.09977	0.060301	0.786292	0.377432
17	2216258	T	C	2.456	0.34	0.02494	0.083675	0.34524	0.247757
8	25892142	C	T	7.898	0.27	0.31395	0.077002	0.605038	1.35718
2	234668570	C	T	3.978	0.39	0.1747	0.060301	0.777112	0.148273
17	7521915	G	T	5.822	0.35	0.16266	0.060301	0.794793	0.718206
16	5585852	A	G	4.54	0.25	0.08418	0.063197	0.647029	4.19175e-49
3	132163200	G	T	0.363	0.27	0.0898	0.060301	0.58498	0.187741
1	63199936	G	T	1.706	0.37	0.21374	0.060301	0.498721	0.185214
17	6034831	G	A	11.56	0.34	0.9371	0.083675	0.53444	0.0517989
1	68635390	T	C	4.08	0.39	0.09987	0.083675	0.698353	0.977697
3	99481539	G	T	0.558	0.23	0.13108	0.063197	0.581258	0.280326
12	102799598	A	G	2.306	0.29	0.08513	0.063197	0.276231	0.643444
22	24996630	C	T	5.602	0.25	0.12596	0.091713	0.691335	0.963873
2	112500035	A	C	0.283	0.47	0.05418	0.060301	0.41276	1.35361e-45
6	32628428	C	A	5.783	0.27	0.20792	0.060301	0.758152	0.587857
1	9317604	C	T	7.097	0.42	0.09394	0.060301	0.823719	0.00286289
10	8954224	A	G	3.303	0.36	0.16242	0.135981	0.587224	0.185214
2	191935804	C	T	1.238	0.56	0.03471	0.060301	0.408903	0.450881
2	234673309	C	T	3.335	0.36	0.15599	0.060301	0.406001	0.153356
16	1073552	A	G	5.736	0.15	0.03747	0.074216	0.550313	0.647909
19	49144790	C	T	5.86	0.24	0.1111	0.175069	0.525209	0.333487
12	96817422	A	G	8.403	0.29	0.47793	0.060301	0.810473	0.808001
12	123731423	A	G	1.889	0.3	0.16294	0.060301	0.211345	0.00286289
10	91002927	C	T	3.261	0.24	0.14336	0.091713	0.419045	0.559003
18	53058238	C	T	16.52	0.28	0.69652	0.073421	0.933674	1.98144
3	45809329	C	A	5.213	0.34	0.08018	0.060301	0.745402	0.00286289
3	134233092	A	G	0.802	0.23	0.05299	0.060301	0.650373	0.511471
15	53946593	A	C	2.296	0.24	0.03118	0.060301	0.824419	0.00286293
11	118574675	C	T	7.255	0.26	0.03946	0.083675	0.768714	3.1049e-18
6	31143582	A	C	6.525	0.19	0.06964	0.106748	0.697741	1.48076
10	102979207	T	C	21.6	0.52	0.99351	0.104817	0.880649	0.999747
1	154814353	C	T	3.368	0.17	0.15407	0.060301	0.351265	0.148273
4	131127633	T	C	4.622	0.31	0.06203	0.063197	0.828685	1.82346e-21
8	4560081	A	G	6.019	0.39	0.07703	0.063197	0.774357	0.0625422
7	143109139	T	C	1.945	0.37	0.13507	0.102588	0.451939	2.60723e-51
3	179172979	G	T	1.084	0.39	0.06438	0.060301	0.540861	0.185214
1	162168154	G	A	14.77	0.28	0.21283	0.134018	0.874727	1.46135
3	66431602	A	G	4.236	0.16	0.25504	0.12342	0.624669	0.147798
2	32278782	A	G	1.543	0.34	0.04812	0.060301	0.277107	1.14254e-80
4	3473139	A	G	1.555	0.26	0.02637	0.104817	0.415173	0.148273
1	8526142	G	A	6.519	0.32	0.10873	0.091966	0.377938	0.656358
1	56960123	C	T	8.102	0.62	0.37231	0.073421	0.582549	1.79221
1	115099092	C	T	1.967	0.31	0.06115	0.060301	0.580394	3.5285e-52
11	92698427	C	G	2.896	0.31	0.03953	0.060301	0.482351	5.29407e-31
6	119000232	T	C	7.468	0.39	0.33766	0.063197	0.768642	0.810864
3	38681394	A	G	1.578	0.27	0.05081	0.091713	0.575846	0.51579
6	32787036	C	A	2.894	0.2	0.05562	0.060301	0.125403	0.57833
15	75019449	C	T	8.521	0.37	0.21059	0.104817	0.775235	0.79723
11	116706047	G	A	1.683	0.32	0.13382	0.182457	0.853008	1.81948
12	100820085	A	G	1.372	0.44	0.12009	0.063197	0.589608	0.185214
22	29115066	C	T	3.245	0.39	0.07263	0.060301	0.232978	0.970125
6	31097301	C	T	6.916	0.24	0.15686	0.060301	0.725976	0.188077
13	110929162	C	T	4.672	0.27	0.06327	0.060301	0.756266	0.5709
11	18419806	A	G	9.972	0.22	0.15428	0.137589	0.894357	0.763545
5	131660431	A	T	0.166	0.21	0.11602	0.063197	0.493395	0.147794
4	145574844	A	G	5.411	0.3	0.21423	0.060301	0.463337	0.106622
6	41925159	G	A	14.05	0.34	0.32029	0.060301	0.697855	1.54385
4	10331294	T	G	2.263	0.29	0.08172	0.063197	0.518602	1.75435e-37
8	130491165	T	C	4.062	0.34	0.13467	0.060301	0.550541	1.58115e-20
16	20477474	G	T	1.296	0.09	0.03352	0.060301	0.211844	0.0028629
17	9709946	G	A	0.636	0.37	0.0549	0.063197	0.25807	0.00286289
16	73068678	G	A	4.19	0.26	0.25767	0.104817	0.574868	0.865012
9	4844265	T	C	0.713	0.16	0.06191	0.121303	0.446051	0.656972
1	169101060	G	A	13.41	0.59	0.96208	0.343423	0.862982	0.996575
15	70402309	T	C	10.22	0.39	0.12457	0.060301	0.862321	8.10025e-64
4	109628025	A	C	5.612	0.34	0.12776	0.060301	0.78827	5.676e-27
12	56394954	A	G	3.69	0.12	0.04652	0.060301	0.68255	0.0625422
16	85991705	A	C	0.66	0.2	0.08384	0.060301	0.480122	1.19598e-59
1	65816567	A	G	9.483	0.15	0.13657	0.091713	0.860329	0.291855
3	40096618	G	A	3.552	0.31	0.13164	0.063197	0.533441	0.333008
1	115052708	C	A	2.658	0.21	0.22857	0.151085	0.53382	1.37556
5	76518442	G	A	4.844	0.34	0.03994	0.059349	0.484425	0.68532
17	59483766	C	T	9.309	0.37	0.2396	0.127595	0.638663	1.38633
1	24519920	G	A	3.449	0.39	0.09991	0.074216	0.564214	0.185214
12	29917265	C	A	2.415	0.21	0.10559	0.060301	0.649703	0.148273
6	10995015	G	C	1.054	0.36	0.15195	0.078618	0.651219	0.306886
9	22206987	C	T	20.7	0.49	0.92058	0.063197	0.873283	0.808001
20	17122593	A	G	6.602	0.38	0.28677	0.063197	0.653888	0.622787
9	101908365	T	G	0.526	0.47	0.09818	0.121303	0.505721	0.97958
5	158843235	C	A	0.206	0.32	0.05105	0.060301	0.34559	1.41154e-38
7	134785741	T	C	10.55	0.34	0.12743	0.063197	0.86303	0.333487
12	111350655	A	G	5.362	0.16	0.04349	0.060301	0.762271	0.372955
9	22115105	C	A	1.288	0.3	0.0406	0.060301	0.532317	0.976866
2	25169200	A	G	8.997	0.42	0.11402	0.231597	0.846233	1.38633
11	45873091	A	C	3.184	0.25	0.1782	0.060301	0.589884	0.492101
20	39672618	T	A	1.129	0.41	0.04365	0.081037	0.520416	0.900605
8	128424792	A	G	4.925	0.27	0.15097	0.063197	0.516943	0.808001
16	19944363	A	G	3.592	0.44	0.08759	0.060301	0.737286	2.86673e-32
10	105714399	C	T	2.944	0.33	0.05027	0.063197	0.624319	2.00239e-34
6	47453378	G	C	0.963	0.29	0.08415	0.081037	0.560873	0.917488
4	9995182	G	C	1.458	0.23	0.03691	0.063197	0.284414	0.306886
21	40465512	G	T	0.98	0.33	0.0987	0.060301	0.677634	6.48734e-40
3	135925191	T	A	7.679	0.33	0.12479	0.060301	0.724217	1.55978e-07
2	127892810	C	T	12.59	0.29	0.0648	0.060301	0.803789	0.185214
7	142456928	T	C	1.533	0.36	0.06328	0.063197	0.535445	4.515e-70
17	44056767	G	A	5.966	0.38	0.16091	0.060301	0.740354	0.966401
20	55991695	G	A	2.952	0.4	0.1038	0.074216	0.546674	0.185214
18	43309911	C	T	0.986	0.22	0.08739	0.060301	0.627844	1.14004
4	99796784	T	C	0.211	0.26	0.036	0.059349	0.105749	1.06567
16	60314656	G	T	0.82	0.36	0.14453	0.063197	0.601749	5.27681e-22
4	82184234	A	G	0.975	0.48	0.11608	0.063197	0.578231	1.35399e-107
6	135427817	G	A	4.402	0.36	0.04794	0.063197	0.521975	0.185223
10	96681846	G	A	2.357	0.3	0.06735	0.060301	0.462015	1.75769e-30
13	102930574	T	G	5.652	0.49	0.18168	0.063197	0.684039	0.187741
11	7968359	C	T	1.711	0.11	0.07825	0.063197	0.321679	4.10037e-25
5	131430118	G	A	4.285	0.38	0.20852	0.063197	0.53368	0.185214
3	41786009	T	C	8.191	0.22	0.25816	0.063197	0.720346	0.57833
11	16902268	C	T	6.828	0.27	0.17257	0.083675	0.75901	0.148273
16	11228712	C	T	4.363	0.21	0.16136	0.074216	0.707495	0.763545
4	187152327	A	T	0.723	0.15	0.13051	0.060301	0.726683	0.51579
9	137285503	A	G	6.468	0.32	0.0663	0.074216	0.763366	1.15534
3	49510931	G	A	3.774	0.38	0.08982	0.068591	0.577951	1.48051
7	136642634	T	C	4.046	0.33	0.14817	0.060301	0.722666	1.20567
2	81668808	T	C	0.767	0.34	0.13141	0.063197	0.494553	2.30675e-81
15	51530495	G	A	9.381	0.21	0.17588	0.060301	0.690584	0.0847532
2	182323665	C	T	5.63	0.3	0.25332	0.091372	0.77953	0.696686
18	57851763	A	G	1.038	0.38	0.07029	0.060301	0.423678	4.60935e-78
2	237058144	T	C	0.598	0.21	0.0249	0.060301	0.205984	0
11	122845075	A	C	11.55	0.27	0.51491	0.091372	0.832894	9.38604e-05
6	72193707	A	C	0.34	0.27	0.05678	0.060301	0.507943	1.79492e-100
12	71663102	C	T	0.02	0.29	0.08249	0.063197	0.708997	0.492101
12	58133256	G	A	11.68	0.34	0.31489	0.125351	0.769979	0.647909
2	31810974	T	A	0.126	0.21	0.03851	0.063197	0.136609	0.185214
8	128106880	A	C	0.584	0.24	0.07192	0.063197	0.395539	1.07235e-40
8	19816238	A	C	4.764	0.06	0.0341	0.083675	0.373935	0.968606
12	112871372	A	G	11.11	0.43	0.44425	0.059349	0.876818	1.12752
4	95224812	T	G	6.868	0.25	0.08091	0.060301	0.705069	0.188077
12	33576990	A	C	0.634	0.2	0.10189	0.083675	0.762207	0.0700956
3	141143430	G	A	2.791	0.3	0.05804	0.060301	0.699034	0.00286289
2	162029113	T	G	8.159	0.39	0.14495	0.060301	0.710784	1.67714
17	44081064	A	G	1.252	0.22	0.10682	0.060301	0.44091	0.966401
20	12959398	T	C	2.668	0.24	0.22057	0.063197	0.800235	0.185216
15	60894965	C	T	3.548	0.35	0.03989	0.063197	0.510561	0.388575
10	96734676	T	C	2.135	0.27	0.03324	0.060301	0.452848	0.147794
6	117210052	T	C	18.5	0.27	0.96564	0.063197	0.891754	1.82202
19	17752689	A	C	0.637	0.38	0.06428	0.121303	0.548531	0.394092
2	25116977	C	T	4.036	0.28	0.0624	0.060301	0.288693	0.499125
1	219727779	T	C	1.869	0.39	0.128	0.060301	0.448616	0.185214
4	10286301	C	T	1.471	0.23	0.05545	0.063197	0.362505	1.7842e-59
19	2170954	A	T	2.23	0.29	0.05814	0.091966	0.347671	0.647909
2	31464385	T	A	6.725	0.19	0.10496	0.060301	0.495727	0.492101
5	131402738	C	T	5.603	0.37	0.10151	0.083675	0.642685	2.09093e-43
5	78278229	A	G	2.011	0.23	0.07985	0.121303	0.699605	0.981702
12	121438844	T	C	7.294	0.25	0.1091	0.068591	0.753317	1.4878
17	79235788	T	C	1.748	0.26	0.05129	0.074216	0.625663	1.29866
5	179731014	T	C	1.679	0.26	0.07655	0.254355	0.40301	0.784482
6	32572251	T	C	7.212	0.33	0.19943	0.060301	0.665589	2.24931
5	137573725	G	A	0.654	0.31	0.10553	0.060301	0.216529	0.185214
14	105391005	C	T	0.555	0.44	0.0734	0.074216	0.65936	0.188077
6	32763514	A	G	1.779	0.26	0.07687	0.060301	0.519316	0.976866
6	116768917	A	G	0.356	0.4	0.12446	0.060301	0.311211	0.765417
7	100497131	A	G	2.952	0.37	0.13749	0.060301	0.339121	0.185214
20	39091487	A	G	15.37	0.29	0.08569	0.060301	0.91367	1.6139
2	71688118	C	A	1.989	0.36	0.12817	0.125351	0.589195	0.945024
4	157720124	C	T	4.248	0.33	0.05757	0.060301	0.32704	0.493601
1	26521140	G	A	4.106	0.42	0.05477	0.083675	0.268407	0.0028629
16	16127235	G	A	3.414	0.21	0.08342	0.083675	0.591462	1.93679
10	101284237	T	G	11.93	0.35	0.94519	0.127595	0.442768	0.185214
11	78048524	A	C	0.141	0.41	0.17944	0.063197	0.415746	1.5031
1	177873210	G	T	2.532	0.31	0.18099	0.063197	0.426244	0.622786
6	142767633	A	G	3.006	0.52	0.09165	0.060301	0.64621	2.52415e-23
2	33360338	A	G	1.524	0.16	0.14641	0.060301	0.554276	0.445452
7	120758899	G	A	0.661	0.2	0.04451	0.063197	0.425429	0.800093
10	121536327	G	A	0.353	0.42	0.05127	0.063197	0.0883834	0.188077
1	242040775	C	T	4.216	0.41	0.06391	0.121303	0.639826	0.802175
15	77963887	A	G	7.29	0.24	0.05332	0.060301	0.26294	1.92144
6	106568034	C	T	1.717	0.42	0.12381	0.063197	0.422012	7.5593e-45
4	18033488	T	C	1.764	0.2	0.0919	0.063197	0.784958	8.65631e-51
16	7459347	T	A	21.9	0.51	0.98437	0.060301	0.863703	1.23893
6	127167072	A	C	0.331	0.22	0.07532	0.063197	0.222128	4.33206e-54
12	30113883	C	G	1.909	0.21	0.07653	0.063197	0.448609	2.51935e-30
4	103511114	G	A	10.21	0.47	0.50767	0.063197	0.826427	2.58196
1	235092600	A	C	0.771	0.33	0.32017	0.091966	0.724564	0.79723
10	132747887	C	T	3.441	0.22	0.10912	0.063197	0.517128	3.15944e-17
1	172189889	T	G	9.626	0.41	0.09096	0.063197	0.575308	0.790984
17	61548476	G	A	0.739	0.31	0.06174	0.056003	0.740877	5.24674e-43
18	46453463	T	C	12.07	0.2	0.16432	0.091713	0.924951	1.77261
2	201580954	C	T	5.622	0.41	0.14343	0.063197	0.638885	0.796799
6	32599999	G	A	1.822	0.23	0.06318	0.063197	0.196717	0.306886
9	110156300	C	T	0.501	0.37	0.11548	0.063197	0.637455	1.78177e-43
16	70045748	A	C	8.083	0.39	0.77463	0.292756	0.670246	0.807938
13	45900267	G	A	1.795	0.27	0.08404	0.068591	0.749252	0.185214
2	29247997	T	G	6.672	0.28	0.13107	0.060301	0.722647	0.993814
6	135411228	T	C	1.047	0.33	0.1287	0.063197	0.481495	2.08296
6	160863532	T	C	3.684	0.22	0.11983	0.060301	0.61803	0.0847532
1	120451190	T	C	1.832	0.36	0.16968	0.060301	0.504697	2.12673e-31
4	22824021	G	A	2.74	0.26	0.10783	0.063197	0.76256	3.44127e-81
6	32671103	T	C	0.521	0.29	0.08568	0.060301	0.36823	8.98021e-42
12	53727955	G	A	5.142	0.26	0.13771	0.060301	0.323739	0.106622
15	78908032	A	G	6.566	0.15	0.1445	0.060301	0.837744	0.0847532
10	59189178	T	C	6.471	0.43	0.10457	0.063197	0.845178	6.35801e-09
3	37518545	T	A	0.732	0.34	0.08268	0.060301	0.368163	0.313911
6	35034800	G	C	0.104	0.19	0.03637	0.083675	0.611389	1.0267
10	104846178	T	C	12.34	0.64	0.82502	0.068591	0.783872	1.2707
19	45432557	G	C	1.205	0.21	0.03765	0.060301	0.311965	0
6	32414273	T	C	0.504	0.3	0.1767	0.063197	0.55433	0.185214
9	22031005	G	A	4.237	0.44	0.04774	0.060301	0.783721	0.0771009
10	43610366	G	A	0.938	0.11	0.10092	0.074216	0.354904	0.973267
14	69210199	G	A	3.443	0.36	0.04471	0.060301	0.774589	0.185214
12	111340243	T	C	4.626	0.39	0.04952	0.060301	0.724824	0.0625422
1	204576983	A	G	12.49	0.31	0.13683	0.060301	0.823085	4.44793e-41
2	21123352	C	A	7.037	0.39	0.31769	0.060301	0.525804	0.808001
6	31085770	G	A	3.014	0.23	0.07107	0.060301	0.77656	0.0625422
17	38069949	C	T	2.696	0.71	0.04732	0.175069	0.658895	0.00286289
18	57858829	T	C	0.028	0.34	0.07476	0.060301	0.486646	4.77531e-53
3	171995605	C	T	8.507	0.48	0.29824	0.060301	0.492528	0.685329
15	61854663	G	A	1.272	0.32	0.1342	0.063197	0.35077	2.14277e-37
4	187188094	T	G	2.079	0.35	0.10373	0.182457	0.423623	2.06046
6	25823444	A	T	0.37	0.25	0.03765	0.063197	0.615995	0.208878
15	84580582	A	C	0.023	0.18	0.04331	0.060301	0.572341	0.0847532
17	61563458	A	G	0.463	0.18	0.04252	0.060301	0.388617	0.148273
1	155126948	T	C	1.904	0.24	0.02415	0.060301	0.172512	0
7	23482685	G	A	1.952	0.34	0.07408	0.060301	0.484461	0.492101
10	6103762	C	T	2.057	0.36	0.18099	0.060301	0.489034	0.966401
5	58979946	C	T	1.076	0.37	0.09525	0.060301	0.53075	0.313911
6	25548288	G	A	0.64	0.2	0.06339	0.060301	0.311918	0.00286289
22	39670851	G	T	1.561	0.43	0.10546	0.060301	0.729946	5.31862e-56
9	6175855	A	T	1.62	0.33	0.20408	0.060301	0.661739	3.4742e-46
8	55437524	A	G	5.028	0.38	0.15316	0.063197	0.696846	0.185214
1	165736880	C	T	4.112	0.3	0.16991	0.060301	0.38925	0.57833
7	65326821	A	G	2.484	0.21	0.02778	0.060301	0.533173	7.58814e-31
13	28020180	G	A	4.428	0.26	0.13294	0.060301	0.670358	0.306949
7	151407801	G	A	0.632	0.24	0.05746	0.060301	0.646203	0.887349
5	88152117	C	T	0.329	0.29	0.03101	0.063197	0.453142	1.13978
2	233513175	C	A	1.085	0.44	0.06949	0.072005	0.371755	0.306886
17	26106675	A	G	1.623	0.46	0.15205	0.060301	0.449015	0.0847532
6	31018407	A	G	6.339	0.16	0.07036	0.060301	0.685561	2.66823e-29
15	78774271	C	T	3.226	0.2	0.11909	0.081037	0.683387	0.679798
4	154864750	T	C	0.114	0.37	0.05521	0.060301	0.316605	2.65015e-96
19	52601399	G	A	3.871	0.34	0.12953	0.060301	0.601252	1.78857e-29
10	104775908	G	A	2.306	0.12	0.04494	0.083675	0.404909	0.462695
11	31409438	A	G	6.525	0.33	0.1249	0.060301	0.697776	0.148273
12	29435480	G	A	0.408	0.3	0.09838	0.063197	0.30375	0.188077
11	126243952	G	A	3.035	0.2	0.11722	0.076284	0.498375	0.247757
11	61639573	G	A	4.262	0.23	0.11208	0.104817	0.561936	0.185214
12	66343810	C	T	9.043	0.23	0.10536	0.060301	0.760592	1.05185
5	158787385	G	A	0.678	0.39	0.02753	0.059349	0.490096	6.63552e-41
8	119976542	C	A	0.359	0.35	0.03559	0.063197	0.389387	1.20842e-63
2	234825093	T	C	3.344	0.46	0.08888	0.060301	0.684932	2.49344e-26
5	157845402	C	T	0.087	0.49	0.05478	0.063197	0.467458	4.4954e-107
12	69771073	G	T	0.739	0.33	0.03322	0.121303	0.360262	0.924202
7	130680521	T	C	11.38	0.47	0.26999	0.060301	0.732001	0.185214
16	83764204	T	C	0.634	0.24	0.05121	0.060301	0.305061	0.0847532
1	11280994	T	C	6.584	0.21	0.0408	0.128073	0.689712	0.931831
14	64234243	A	G	10.38	0.24	0.18777	0.060301	0.847236	3.50743e-11
13	112181437	C	G	1.207	0.35	0.04939	0.060301	0.387075	3.18187e-12
5	150223387	T	C	0.994	0.3	0.05325	0.060301	0.377456	1.43634e-37
22	29621477	C	T	7.193	0.35	0.13408	0.072005	0.369497	2.1217
11	60793651	C	G	3.002	0.27	0.13184	0.060301	0.425286	0.991073
13	80959207	G	A	2.235	0.54	0.03942	0.063197	0.456623	6.35801e-09
13	105039146	A	G	2.56	0.37	0.10553	0.063197	0.704195	9.56538e-20
11	76248630	C	T	9.264	0.6	0.24442	0.125526	0.749475	0.00286289
6	29970589	T	G	8.731	0.17	0.06205	0.056003	0.721936	0
12	66359752	C	A	13.36	0.51	0.85186	0.292756	0.809036	0.86673
10	22315843	A	C	0.101	0.36	0.03984	0.060301	0.441045	0.185214
5	78291960	C	T	2.917	0.32	0.1473	0.063197	0.306472	5.86281e-55
2	106454085	C	T	2.679	0.41	0.04514	0.060301	0.611974	0.686423
17	38074031	T	C	2.723	0.15	0.03291	0.292756	0.308018	0.00286289
16	52347819	T	G	3.685	0.46	0.22246	0.060301	0.55616	6.35801e-09
6	29084232	T	C	4.647	0.24	0.09954	0.063197	0.661681	1.75769e-30
1	8095500	T	G	1.366	0.29	0.06884	0.063197	0.45503	0.492101
17	62998023	C	T	2.555	0.43	0.14251	0.060301	0.443171	0.185214
6	156913012	G	A	3.557	0.4	0.12506	0.060301	0.77056	2.32565e-30
8	11343680	A	G	1.484	0.18	0.04954	0.063197	0.548843	0.185214
3	87495550	C	T	2.437	0.43	0.09134	0.063197	0.441713	8.55561e-31
6	26510564	T	C	2.384	0.42	0.06524	0.060301	0.319422	0.0847532
17	38066240	T	C	1.572	0.2	0.04968	0.121303	0.351965	0.00286289
1	165873392	T	C	0.99	0.22	0.15761	0.082826	0.575308	0.333008
15	70589272	T	C	3.952	0.32	0.11974	0.063197	0.735101	1.03423e-26
5	153057548	C	T	7.827	0.53	0.34268	0.063197	0.791702	1.09454
12	123823546	A	G	2.821	0.24	0.1408	0.060301	0.497006	0.0847533
11	89201627	G	A	1.492	0.27	0.06825	0.063197	0.540467	0.0625422
3	186433099	T	C	1.177	0.24	0.03882	0.060301	0.362172	1.16546e-49
11	27700125	C	T	3.049	0.28	0.07631	0.066767	0.753254	0.310303
10	6098824	T	C	2.198	0.29	0.17387	0.091713	0.733053	0.966401
5	132049027	C	T	1.95	0.18	0.04381	0.060301	0.400135	0.833367
6	14096658	T	C	2.784	0.36	0.10276	0.076284	0.438653	2.95086e-37
11	17008605	T	C	20.8	0.59	0.9486	0.134018	0.856828	0.956274
1	159278251	G	C	0.06	0.34	0.05515	0.060301	0.362647	1.29349e-128
11	114431956	A	G	11.56	0.45	0.06494	0.060301	0.892013	0.185214
2	10200316	G	A	0.521	0.42	0.08113	0.060301	0.218659	0.188077
2	201576284	A	G	2.081	0.14	0.11059	0.060301	0.382735	2.54278e-80
4	73515313	T	C	20.7	0.46	0.98406	0.063197	0.789888	0.622787
2	111849659	A	G	2.91	0.34	0.16232	0.063197	0.763335	0.188077
6	121730722	G	A	2.79	0.29	0.07868	0.059349	0.817815	0.185214
9	28425515	C	G	3.49	0.194674	0.15297	0.063197	0.668159	0.00286289
15	58694020	G	T	1.733	0.46	0.04494	0.063197	0.442865	0.685329
16	86011033	C	T	2.79	0.34	0.07693	0.060301	0.555497	4.68648e-38
15	62332980	A	G	5.527	0.52	0.19488	0.063197	0.732325	0.929673
2	234158839	C	T	4.362	0.34	0.04966	0.060301	0.682471	0.647909
10	5353690	G	A	0.281	0.22	0.0461	0.063197	0.625827	0.185214
17	69108753	G	T	0.643	0.43	0.07709	0.063197	0.431981	4.92577e-65
19	2177193	C	G	3.325	0.35	0.10968	0.074216	0.582424	0.462695
6	542159	A	G	1.689	0.12	0.04913	0.121303	0.575221	0.72991
1	171949750	T	C	1.872	0.23	0.02522	0.060301	0.32443	0.168198
11	8639200	T	C	3.417	0.46	0.09306	0.078618	0.501339	0.0028629
12	56364321	A	G	12.85	0.64	0.98272	0.068591	0.574309	1.79075
6	32429643	T	C	0.509	0.19	0.05038	0.060301	0.546135	1.40274e-82
1	162191103	G	A	0.903	0.31	0.09712	0.091713	0.387347	0.46554
19	19478022	G	T	0.444	0.29	0.10933	0.091966	0.671049	0.79723
6	25607571	A	G	4.405	0.31	0.12859	0.060301	0.729803	0.188077
4	72608115	C	T	3.42	0.21	0.10646	0.063197	0.692697	0.330576
1	176792249	A	G	0.127	0.28	0.06812	0.063197	0.378358	0.187741
8	126540051	G	A	2.767	0.21	0.25667	0.060301	0.77569	0.79723
10	80925577	G	C	9.775	0.37	0.29083	0.074216	0.852473	2.00313
8	119977792	G	C	0.569	0.31	0.06306	0.063197	0.383536	1.68694e-76
7	47437244	G	A	2.504	0.23	0.07245	0.060301	0.431681	0.187741
1	161991237	G	A	5.992	0.37	0.144	0.091966	0.31841	0.188077
3	121993247	A	G	1.496	0.27	0.12038	0.063197	0.797356	0.208878
19	41985587	A	G	2.158	0.36	0.05232	0.063197	0.333932	0.984605
12	90008959	A	G	4.378	0.39	0.15428	0.083675	0.573855	0.280326
9	15289578	C	T	1.265	0.24	0.06191	0.060301	0.511385	0.188077
6	161137990	G	A	0.226	0.16	0.05106	0.063197	0.317501	0.708978
3	41137672	A	G	10.83	0.4	0.65803	0.060301	0.534841	0.808001
10	70011838	A	G	16.6	0.54	0.13072	0.066767	0.809251	1.61307
13	93945858	A	T	0.127	0.33	0.14282	0.060301	0.436807	1.10412
10	95348182	T	C	2.38	0.34	0.09565	0.060301	0.791009	0.00286289
17	11407901	G	A	2.287	0.46	0.06536	0.060301	0.340947	0.0028629
6	10981053	G	A	13.45	0.49	0.95247	0.060301	0.72689	0.929673
5	78346769	T	C	5.212	0.36	0.17745	0.060301	0.720372	0.62565
20	45288453	G	A	0.717	0.34	0.05834	0.060301	0.298599	0.462695
8	11045161	G	A	2.263	0.24	0.0699	0.081037	0.244385	0.00286289
22	30494371	G	A	1.79	0.13	0.05481	0.063197	0.58053	0.00286289
20	44545048	C	T	6.024	0.22	0.14755	0.060301	0.686363	0.185214
7	16707861	A	G	19.37	0.57	0.98133	0.115951	0.765854	3.32399
9	104223233	C	G	0.631	0.46	0.03356	0.060301	0.588278	0.185214
5	171969348	C	T	2.113	0.33	0.14645	0.060301	0.56827	0.185216
4	156998541	T	C	3.131	0.31	0.04107	0.063197	0.646998	1.75769e-30
17	73872948	A	G	4.634	0.46	0.81702	0.182457	0.578674	1.10412
3	187687074	A	C	0.316	0.42	0.2231	0.060301	0.497919	1.789
18	12821593	A	G	9.264	0.43	0.51272	0.120825	0.814378	1.10534
17	48274291	T	G	7.115	0.32	0.10755	0.082826	0.464487	1.42788
13	53613559	C	T	2.538	0.2	0.02697	0.060301	0.57839	0.0625422
10	113933886	A	G	5.889	0.32	0.0741	0.121303	0.330342	0.765879
17	41878166	A	C	14.18	0.45	0.21805	0.083675	0.840502	2.62574e-46
2	67864675	C	T	4.089	0.33	0.03362	0.063197	0.409658	0.00153992
9	136137657	C	T	3.703	0.2	0.12863	0.060301	0.360311	6.11703e-25
12	96858362	A	T	1.295	0.42	0.1186	0.060301	0.536071	7.88707e-15
3	66809942	A	T	0.679	0.29	0.15392	0.063197	0.785617	3.2132e-39
20	4677092	G	A	2.383	0.39	0.09616	0.060301	0.597028	0.690876
21	16805220	T	C	4.793	0.44	0.20126	0.060301	0.690566	0.622787
10	9053132	C	T	0.719	0.44	0.14507	0.063197	0.368252	1.12448
4	155543369	T	C	2.534	0.38	0.14872	0.060301	0.749155	0.587086
8	98166913	T	C	1.377	0.24	0.06695	0.063197	0.704829	1.00019e-44
1	6149122	G	A	1.091	0.25	0.1751	0.074216	0.579518	0.492101
9	22019129	A	G	4.088	0.28	0.18291	0.060301	0.642416	0.810864
13	113694509	A	G	2.2	0.27	0.04597	0.060301	0.325187	0.208878
1	118864602	T	G	10.96	0.5	0.11999	0.060301	0.777562	0.185214
16	58209274	G	A	4.131	0.1	0.1081	0.121303	0.323726	0.989128
11	125179853	A	G	4.885	0.19	0.13822	0.060301	0.655977	0.174287
20	32304653	C	G	11.41	0.3	0.3437	0.060301	0.877691	0.746617
5	108113344	C	T	1.288	0.33	0.0574	0.063197	0.366249	0.643444
8	19827848	C	A	3.03	0.29	0.03536	0.060301	0.298031	4.12724e-43
15	45652703	C	T	6.791	0.24	0.06769	0.060301	0.701672	1.08556e-37
7	111677906	C	T	2.247	0.34	0.0992	0.063197	0.565568	0.306886
17	59286644	G	C	8.573	0.39	0.97323	0.060301	0.502922	1.5004
22	18439958	C	T	5.072	0.26	0.11849	0.060301	0.735531	0.291836
2	234679384	C	T	2.997	0.36	0.0643	0.060301	0.269637	0.148273
19	52532271	C	T	8.188	0.38	0.29764	0.100691	0.683285	1.10412
5	88099951	G	C	1.015	0.37	0.13822	0.063197	0.513293	0.954569
1	67627828	A	G	0.573	0.22	0.06881	0.063197	0.343535	0.00286289
2	112496	A	C	0.66	0.52	0.04783	0.060301	0.399001	2.17212e-50
2	217894756	T	C	4.495	0.41	0.15277	0.063197	0.470381	0.622787
4	89869078	C	T	1.651	0.36	0.12318	0.060301	0.754703	0.333487
15	58730498	C	T	3.339	0.18	0.05971	0.060301	0.456262	1.06162
16	89818732	C	G	4.903	0.2	0.18896	0.060301	0.625811	0.763706
6	41890982	T	C	3.942	0.34	0.05276	0.10224	0.642079	0.891912
11	123394636	G	C	2.251	0.51	0.16553	0.060301	0.731982	1.33206e-62
6	167406633	G	C	6.571	0.25	0.07852	0.125526	0.818995	5.48171e-29
9	22072264	A	G	3.387	0.17	0.14201	0.060301	0.81801	1.71937e-06
6	20665946	T	C	0.922	0.19	0.08006	0.063197	0.576713	0.148273
5	35943042	A	C	3.44	0.32	0.17239	0.060301	0.717747	2.51935e-30
1	35908451	T	C	11.62	0.42	0.09168	0.231514	0.827413	1.7324
6	111554822	C	G	2.288	0.39	0.02636	0.060301	0.480035	1.90771e-23
1	121280613	A	G	0.782	0.43	0.10718	0.060301	0.726795	0.983003
2	24694472	C	T	4.725	0.39	0.16336	0.060301	0.794265	0.0022945
11	128582557	T	C	2.892	0.26	0.07861	0.060301	0.580862	0.462695
9	108936674	T	C	2.292	0.39	0.0839	0.063197	0.491976	1.07381e-56
6	131757247	C	A	2.236	0.36	0.06903	0.060301	0.263692	3.6745e-29
2	33701890	T	C	8.472	0.27	0.25582	0.078125	0.665563	2.7257
7	119606632	C	T	0.275	0.24	0.05563	0.063197	0.684726	1.40274e-82
14	75701221	C	T	3.397	0.33	0.12883	0.135981	0.566962	1.18398
6	34546560	C	T	1.399	0.24	0.08058	0.078125	0.509338	0.79723
3	133589324	C	T	2.308	0.26	0.11893	0.060301	0.635359	0.982752
6	22125964	T	C	13.62	0.35	0.54375	0.060301	0.86988	0.808001
10	107516352	T	C	5.98	0.51	0.24109	0.063197	0.590721	0.808001
1	47396162	A	G	2.772	0.11	0.13005	0.063197	0.494271	0.0847532
5	147856333	G	A	7.613	0.17	0.06231	0.060301	0.671737	1.17731
2	118835841	G	A	1.95	0.31	0.2451	0.060301	0.699976	0.185214
10	8701219	G	A	2.577	0.5	0.12361	0.063197	0.328081	3.18187e-12
17	2068932	C	A	4.613	0.32	0.02078	0.121303	0.298104	0.260237
18	10737779	G	A	5.788	0.43	0.19846	0.060301	0.620221	0.00286289
6	9451197	T	A	1.823	0.27	0.11061	0.063197	0.684137	5.51915e-109
2	31482300	A	G	2.328	0.28	0.05363	0.060301	0.552459	0.492101
6	29670261	A	G	1.056	0.22	0.05539	0.065574	0.441983	0.79723
2	622827	T	C	0.029	0.35	0.03673	0.060301	0.383873	5.19564e-163
16	83712435	A	G	2.643	0.41	0.11213	0.060301	0.310506	0.269968
1	21786068	C	T	0.821	0.31	0.03537	0.060301	0.281419	0.204865
5	1287194	G	A	3.712	0.26	0.02931	0.083675	0.597518	1.31872
16	31368874	T	C	4.843	0.2	0.12824	0.072005	0.625782	0.46554
11	59923508	A	G	6.488	0.26	0.26163	0.063197	0.807988	0.185214
15	84557676	T	G	3.611	0.51	0.24585	0.063197	0.521992	0.70754
10	12918764	C	T	2.545	0.28	0.08669	0.063197	0.280939	0.531097
6	142655801	T	A	3.071	0.24	0.09141	0.063197	0.471262	0.57833
6	135435501	T	C	8.117	0.45	0.30503	0.063197	0.800909	2.09589
8	145155408	C	T	11.04	0.37	0.12714	0.068591	0.839471	0.981702
20	39269074	T	C	4.931	0.41	0.10094	0.060301	0.786344	7.78478e-126
10	114758349	C	T	4.671	0.3	0.0689	0.081037	0.589303	0.734389
10	13991865	G	A	0.817	0.47	0.09254	0.060301	0.722461	0.0847532
6	32681669	T	C	0.914	0.31	0.09014	0.060301	0.341274	0
6	32681277	A	G	0.998	0.25	0.10744	0.060301	0.465618	0
5	52560644	A	G	1.49	0.44	0.06369	0.060301	0.559132	3.37084e-73
15	62396389	A	G	1.818	0.36	0.04501	0.063197	0.484636	0.99177
6	151933175	A	G	3.989	0.11	0.07626	0.060301	0.702455	0.625338
15	68080886	A	T	1.499	0.25	0.04051	0.060301	0.494546	0.462695
6	31906010	G	A	2.155	0.36	0.084	0.060301	0.45154	0.746617
9	25192573	C	T	2.499	0.14	0.04207	0.063197	0.899061	0
6	20725423	G	C	1.408	0.24	0.07108	0.091713	0.685678	0.148273
11	61600342	A	C	2.471	0.3	0.23945	0.087233	0.657758	0.333487
6	119043898	A	G	3.139	0.28	0.12215	0.063197	0.639091	0.185214
5	1279790	C	T	0.615	0.13	0.03398	0.072005	0.420961	0.706704
2	166578114	T	G	6.575	0.41	0.24839	0.063197	0.436941	0.622787
6	34823187	T	C	4.974	0.57	0.15218	0.060301	0.704452	0.148273
12	58108052	C	T	0.285	0.24	0.03006	0.060301	0.378767	0.168198
12	23898340	T	G	3.543	0.34	0.12772	0.060301	0.580693	0.391096
4	73855253	C	T	3.051	0.32	0.05685	0.060301	0.335522	4.27584e-18
17	10033679	C	A	4.283	0.29	0.09026	0.060301	0.496897	0.725583
22	25002081	C	T	1.312	0.21	0.15901	0.066767	0.244725	0.963873
16	85946450	T	C	2.838	0.19	0.12705	0.060301	0.392093	1.25217
4	45175691	C	T	5.605	0.33	0.11724	0.063197	0.788109	3.47135e-07
6	96459651	C	T	1.34	0.31	0.06952	0.060301	0.447429	1.80274e-63
2	21378805	A	G	5.521	0.54	0.24983	0.063197	0.642708	0.185214
16	79734987	G	A	7.475	0.07	0.13838	0.063197	0.833865	5.96904e-31
15	100758385	C	G	3.029	0.28	0.02336	0.060301	0.769278	0.148273
10	35295431	C	G	1.656	0.31	0.0999	0.060301	0.516284	0.185214
18	60783211	G	A	18.62	0.43	0.94249	0.063197	0.615256	0.622787
20	33171772	G	A	1.254	0.29	0.06976	0.060301	0.673963	0.208878
3	175075109	G	T	12.93	0.39	0.33835	0.060301	0.606667	1.11489
20	34023962	G	A	17.92	0.51	0.90233	0.091966	0.873806	0.918951
2	84906915	T	C	3.135	0.19	0.05215	0.060301	0.72536	0.00286289
15	68892989	C	T	5.758	0.36	0.06189	0.087872	0.557501	0.126965
16	77427769	T	C	3.992	0.36	0.09251	0.060301	0.66629	0.00286289
9	109060830	T	C	5.616	0.29	0.19799	0.063197	0.641976	0.621754
5	1315660	G	A	1.935	0.3	0.08293	0.091966	0.621732	0.79723
12	56518408	T	G	11.99	0.42	0.23193	0.060301	0.815548	0.771059
22	39739638	C	G	1.11	0.46	0.03973	0.134018	0.366065	1.789
16	50714335	G	A	0.897	0.28	0.08373	0.060301	0.351631	1.06296
6	32387809	T	C	2.346	0.3	0.07016	0.060301	0.327514	3.18709e-90
4	9935910	A	G	4.251	0.27	0.0309	0.060301	0.494957	0.306886
11	5471746	G	A	3.039	0.16	0.08719	0.063197	0.441614	0.208878
6	7725760	A	T	4.967	0.37	0.20011	0.104817	0.631937	1.12781
7	129004847	C	T	0.288	0.46	0.04621	0.060301	0.619537	0.57833
12	116198341	A	G	2.465	0.19	0.14536	0.060301	0.779093	6.59772e-62
13	95922765	T	C	3.144	0.26	0.11855	0.060301	0.663039	0.247757
9	22169700	T	C	1.471	0.39	0.2166	0.063197	0.77481	0.185214
6	32670255	C	T	7.123	0.26	0.08897	0.060301	0.764876	3.53715e-22
11	30760335	T	C	3.31	0.33	0.13717	0.063197	0.558168	2.99862e-20
10	61467182	G	T	0.054	0.32	0.04762	0.060301	0.255058	0.247757
2	102957716	C	T	4.893	0.22	0.0707	0.573888	0.595357	0
2	49201328	A	G	4.401	0.28	0.23677	0.063197	0.824039	1.01136
6	121781390	T	C	8.1	0.39	0.12681	0.060301	0.876739	0.185214
11	64357072	T	C	0.266	0.36	0.03371	0.056003	0.538232	0.991362
3	99131755	C	A	6.057	0.25	0.06775	0.063197	0.700431	4.13849e-75
12	65762058	G	C	16.89	0.51	0.9782	0.060301	0.665838	0.869107
12	115346424	C	T	17.19	0.47	0.90868	0.063197	0.600907	0.622787
8	19860460	C	G	2.322	0.31	0.07638	0.060301	0.255395	4.53469e-33
11	116662579	C	T	8.323	0.92	0.13614	0.091966	0.764636	0.188096
3	38593393	T	C	1.615	0.25	0.08125	0.063197	0.550119	0.51579
7	104929064	A	C	0.283	0.19	0.03068	0.060301	0.22485	0.844214
6	31197514	C	G	3.025	0.29	0.03374	0.063197	0.360586	0.185214
7	50751090	T	C	0.469	0.23	0.04831	0.060301	0.420667	0.52149
8	128191672	T	A	1.105	0.5	0.15106	0.060301	0.368322	0.185214
6	32975014	T	C	0.325	0.29	0.09504	0.121303	0.400347	0.402643
17	46669430	C	T	20.4	0.44	0.97432	0.104817	0.945381	1.4878
12	24389660	G	T	0.148	0.45	0.06823	0.060301	0.233001	0.185214
13	22487625	G	A	1.314	0.32	0.0669	0.074216	0.355572	0.185214
5	53300662	A	G	5.983	0.18	0.13048	0.060301	0.770984	0.547112
2	192117238	C	T	3.013	0.3	0.08002	0.060301	0.35854	0.208878
19	18817903	C	A	11.71	0.33	0.30595	0.060301	0.882665	0.333487
5	33958959	C	A	7.966	0.31	0.12449	0.091713	0.845484	0.0625422
1	191559356	A	T	0.033	0.4	0.0577	0.063197	0.314266	1.86259e-153
10	63752159	T	G	6.307	0.43	0.24239	0.091713	0.47626	1.93727
9	107703934	G	A	6.983	0.4	0.11372	0.091713	0.597829	0.980284
17	2171637	C	A	4.761	0.44	0.13361	0.060301	0.728109	0.260237
16	580124	C	A	6.056	0.24	0.06327	0.072005	0.431442	0.858451
3	159728878	T	G	0.011	0.21	0.05769	0.063197	0.291499	2.42915e-101
8	19830921	C	T	0.623	0.32	0.04193	0.076284	0.67038	1.46835e-61
18	42800148	C	T	10.58	0.4	0.10774	0.091245	0.705022	0.0625422
4	15737937	A	G	0.372	0.13	0.08935	0.063197	0.36849	0.0625422
1	248046272	C	T	1.378	0.41	0.0853	0.063197	0.514554	0.00286289
6	471136	C	A	3.863	0.28	0.10286	0.074216	0.813899	0.915124
16	72108093	G	A	6.223	0.37	0.13684	0.059349	0.594346	2.06485
6	4146198	T	C	6.565	0.22	0.27773	0.060301	0.743886	2.59166e-10
8	128413305	G	T	18.9	0.81	0.92967	0.048193	0.86369	4.36993
18	46395022	A	G	11.13	0.44	0.13602	0.060301	0.811572	0.185256
7	143110762	G	A	2.666	0.19	0.12443	0.060301	0.736195	0.79723
10	63830286	T	C	4.938	0.23	0.14569	0.063197	0.711795	0.333487
22	32880585	T	C	2.566	0.36	0.04765	0.121303	0.639893	0.168198
14	69126744	T	C	7.995	0.28	0.13965	0.060301	0.719419	0.188077
7	120983343	A	G	5.073	0.4	0.21895	0.060301	0.758234	2.82732e-05
9	6190076	A	C	0.738	0.42	0.09953	0.060301	0.680356	4.97697e-69
4	81164723	C	T	17.78	0.44	0.92379	0.063197	0.707945	0.808001
14	68785077	G	A	2.702	0.28	0.17166	0.060301	0.291887	0.98066
4	140795327	G	A	6.992	0.33	0.09369	0.060301	0.772363	0.402643
15	78802869	C	T	3.576	0.15	0.05835	0.056003	0.282305	0.00286289
14	68760141	C	T	0.109	0.4	0.06953	0.060301	0.438988	0.188077
20	51318351	G	A	6.269	0.31	0.11391	0.063197	0.851039	2.50569e-113
2	164915208	A	G	2.3	0.41	0.14081	0.063197	0.495343	2.06942e-39
10	12277992	C	T	14.28	0.47	0.24739	0.128073	0.848516	0.372955
1	247600301	A	C	1.303	0.35	0.03742	0.063197	0.673635	0.333487
6	161010118	A	G	0.682	0.28	0.0617	0.063197	0.36865	0.296164
12	121439433	G	A	1.817	0.37	0.12153	0.121787	0.512108	0.865012
10	78695467	A	G	2.817	0.23	0.14718	0.066767	0.580054	0.313911
5	56195790	A	G	1.127	0.25	0.06116	0.060301	0.394457	2.41465e-60
6	118680374	C	T	0.347	0.23	0.03411	0.063197	0.155242	1.32591e-37
10	80942631	A	G	1.149	0.35	0.10834	0.065499	0.171391	1.1858
15	68043057	C	G	6.428	0.25	0.26353	0.087872	0.68184	1.2707
8	16697091	G	A	1.05	0.18	0.05387	0.063197	0.687299	6.63552e-41
15	43836478	T	C	7.664	0.25	0.15727	0.063197	0.793944	0.00286289
12	66360164	C	T	6.321	0.25	0.17937	0.060301	0.67126	3.32076e-44
8	27464519	T	C	1.112	0.13	0.11423	0.102588	0.294337	0.746617
6	31446796	G	A	3.129	0.33	0.10393	0.063197	0.279953	6.67354e-20
19	52154905	A	G	2.633	0.23	0.09239	0.063197	0.39212	0.79723
15	75866150	G	C	1.125	0.34	0.15576	0.108573	0.338545	0.411676
1	155878732	A	G	7.465	0.28	0.20089	0.059349	0.486579	1.02543
12	54417576	C	G	8.404	0.47	0.13956	0.104817	0.535484	2.12552
7	18877874	T	G	2.343	0.24	0.12355	0.060301	0.411379	0.690876
3	52279594	G	A	7.908	0.42	0.1844	0.215285	0.94401	0.185214
15	34989626	G	T	0.443	0.22	0.0846	0.060301	0.599277	4.32563e-33
11	2024544	G	A	3.16	0.26	0.19295	0.104817	0.567878	0.185214
18	57829135	T	C	14.97	0.39	0.91168	0.063197	0.805917	3.29914e-26
1	230295789	A	T	3.586	0.22	0.13066	0.102588	0.770924	0.333487
1	226564691	T	C	8.004	0.3	0.14199	0.128073	0.783406	0.791355
10	44524675	C	T	0.934	0.45	0.0656	0.063197	0.433456	1.66959e-72
8	19651161	T	C	0.852	0.2	0.04015	0.063197	0.392729	1.72219e-84
1	53871085	G	C	20.3	0.47	0.97864	0.060301	0.745566	0.622787
6	43764551	C	T	9.793	0.26	0.15534	0.060301	0.774943	0.622787
13	54064981	G	A	18.26	0.43	0.8997	0.060301	0.859165	0.622787
15	101865472	T	C	3.069	0.21	0.06827	0.060301	0.592591	0.51579
21	35652239	A	T	0.468	0.39	0.18108	0.063197	0.426452	1.30479e-54
4	89054667	A	G	0.103	0.33	0.06129	0.060301	0.280056	0.187741
9	98256235	T	G	6.379	0.28	0.17983	0.087233	0.486349	1.03216
2	231116874	C	T	1.519	0.27	0.0575	0.063197	0.228394	0.148273
6	135426573	A	G	2.209	0.28	0.12311	0.063197	0.636806	0.185214
10	90749963	A	G	5.836	0.82	0.13897	0.119651	0.537099	1.5295
1	207757515	A	G	13.11	0.32	0.93437	0.060301	0.8797	0.810527
2	102948632	A	C	1.167	0.22	0.02515	0.060301	0.704289	0.306886
9	136925663	G	T	2.836	0.34	0.08051	0.087233	0.565976	1.02943
10	83566686	C	T	7.85	0.18	0.064	0.063197	0.777779	5.43271e-41
1	67597119	G	A	1.358	0.39	0.02775	0.060301	0.191537	0.188077
5	56256483	C	T	0.272	0.43	0.10973	0.060301	0.404596	0.00286289
18	20190795	G	A	1.337	0.24	0.07813	0.060301	0.496661	3.5497e-93
5	1280028	G	A	0.041	0.25	0.03535	0.074216	0.615475	0.706704
9	37002115	A	G	13.36	0.38	0.21056	0.104817	0.836158	1.96777
2	185601420	C	T	2.405	0.24	0.0434	0.060301	0.642945	0.0625422
1	162318498	A	G	2.296	0.26	0.04691	0.063197	0.715532	0.46554
19	46202172	C	T	0.448	0.47	0.06494	0.068591	0.454368	0.12696
4	106688904	A	G	7.309	0.37	0.10178	0.078125	0.843783	0.333487
16	11691753	T	C	3.904	0.27	0.14456	0.087872	0.728196	1.59372
11	17316029	C	T	5.839	0.32	0.06868	0.063197	0.417021	1.11488
3	27343644	C	T	2.361	0.19	0.0775	0.060301	0.30107	0.97958
17	32593974	G	A	1.248	0.27	0.06048	0.063197	0.507192	7.42879e-46
3	30682939	G	C	1.861	0.28	0.14668	0.059349	0.678003	0.796488
4	74349158	G	A	1.43	0.25	0.06206	0.060301	0.330561	0.00286289
5	131652529	A	C	0.487	0.34	0.21704	0.060301	0.702551	0.147794
1	173309713	A	G	2.895	0.46	0.07766	0.063197	0.780278	1.11916e-72
1	205642790	T	G	3.734	0.29	0.13509	0.087872	0.369664	0.148273
8	19824563	T	C	4.745	0.22	0.16268	0.083675	0.750223	0.345882
2	53782559	C	T	1.62	0.4	0.06048	0.063197	0.500096	0.00286289
16	20371588	G	A	5.989	0.38	0.17165	0.065574	0.77972	1.79177
17	49613785	G	A	2.239	0.25	0.08497	0.060301	0.447186	0.185214
6	168941624	G	A	2.542	0.37	0.06608	0.250983	0.550907	1.77709
11	30749090	T	C	8.14	0.49	0.16162	0.060301	0.825165	8.83719e-59
12	57023284	C	G	8.333	0.28	0.19222	0.119651	0.727973	2.45172
2	162845855	G	A	6.563	0.26	0.13461	0.060301	0.861169	1.59237e-15
16	68591230	A	C	2.609	0.32	0.0461	0.121303	0.675958	0.204865
16	73024276	C	T	8.031	0.35	0.19098	0.066767	0.805177	1.47703
1	218609702	A	G	6.93	0.28	0.0624	0.060301	0.75497	1.02964
15	59487930	C	G	4.013	0.47	0.21728	0.121303	0.240667	0.673236
10	112186148	C	T	2.63	0.49	0.12964	0.063197	0.629982	1.37556
2	27840640	G	C	0.063	0.3	0.05585	0.083675	0.340467	0.00286289
8	11341880	T	C	3.785	0.28	0.11417	0.060301	0.776772	0.800093
8	27442127	C	A	4.572	0.36	0.21466	0.067067	0.80896	2.52485
4	74977837	T	C	4.272	0.38	0.14661	0.106748	0.729472	0.763545
6	160907134	C	T	2.106	0.15	0.05153	0.060301	0.12169	3.19055e-44
1	184649503	C	A	6.633	0.28	0.02842	0.060301	0.614379	0.185214
2	73837955	A	G	4.421	0.46	0.13148	0.060301	0.738718	7.72563e-07
11	83620787	A	G	13.06	0.28	0.17761	0.063197	0.853146	0.808188
11	89005253	A	C	1.222	0.32	0.07072	0.060301	0.685605	0.0847532
6	127600630	G	A	3.14	0.29	0.02258	0.083675	0.584795	0.187741
7	120747308	T	G	4.987	0.24	0.14547	0.060301	0.55908	0.00286289
7	20047575	A	C	2.507	0.24	0.08693	0.066767	0.704887	0.185214
17	7571752	T	G	16.12	0.56	0.97934	0.283776	0.924447	1.62155
8	121562418	G	A	7.065	0.28	0.27795	0.060301	0.531809	1.08548
8	19847690	C	A	6.264	0.31	0.08738	0.063197	0.82428	7.84214e-36
3	114362764	C	G	1.616	0.42	0.12716	0.060301	0.72155	0.796488
16	79682751	T	C	2.808	0.25	0.1326	0.063197	0.35133	0.185214
8	29509616	A	C	1.277	0.34	0.03878	0.063197	0.676324	4.96343e-37
14	92427222	A	C	15.18	0.14	0.5776	0.060301	0.949773	5.48171e-29
22	21932068	C	T	9.656	0.24	0.08439	0.099841	0.777101	2.35021
7	44276651	T	C	2.074	0.37	0.0821	0.074216	0.323759	0.824511
2	150147278	C	T	1.419	0.44	0.11263	0.134018	0.354912	0.185214
19	52586919	T	G	0.209	0.44	0.03574	0.121303	0.344353	0.148273
1	154991389	T	C	5.247	0.42	0.11951	0.068591	0.762607	0.00286289
9	4763176	T	C	7.305	0.25	0.08471	0.182457	0.667629	1.4878
14	81451229	C	T	0.451	0.3	0.02306	0.063197	0.108019	0.430929
8	128485038	A	C	0.11	0.26	0.1089	0.063197	0.524689	0.185214
11	59837192	C	T	3.837	0.25	0.12514	0.063197	0.474627	0.291836
3	64711904	C	T	5.632	0.39	0.16493	0.063197	0.616107	5.76785e-10
22	50971752	A	C	1.048	0.3	0.14631	0.068936	0.328167	0.185214
2	33361425	A	G	14.22	0.27	0.20692	0.060301	0.838636	0.445452
1	240045908	A	G	4.984	0.22	0.11794	0.060301	0.815237	1.35243
12	64264837	G	A	1.826	0.22	0.04333	0.110181	0.563727	0.492101
2	44072576	G	T	0.706	0.31	0.05178	0.060301	0.366713	0.924189
19	1063443	A	G	1.927	0.17	0.06524	0.129117	0.550938	0.647909
5	96252803	G	A	0.516	0.26	0.06937	0.063197	0.664523	0.306886
1	112392360	G	T	0.914	0.23	0.14535	0.060301	0.601761	0.312174
1	31883925	T	C	6.807	0.14	0.0472	0.056003	0.745321	1.11489
11	118743772	T	C	0.012	0.4	0.03654	0.063197	0.257994	5.63448e-117
2	198896895	A	G	5.675	0.38	0.18811	0.063197	0.478699	0.306899
2	63131731	G	A	8.1	0.46	0.15187	0.078618	0.895706	0.306886
6	11008622	G	C	3.033	0.45	0.21617	0.076284	0.448011	1.10458
2	165539661	T	C	0.274	0.38	0.04724	0.063197	0.55873	0.0625422
6	31390410	T	C	1.111	0.23	0.03554	0.059349	0.45861	1.22164e-44
6	484453	C	G	2.292	0.37	0.33066	0.059349	0.352126	0.185214
11	47440758	G	A	6.704	0.29	0.26018	0.082826	0.565799	1.39894
16	53811788	A	G	3.86	0.33	0.20243	0.060301	0.737669	0.647909
6	20661034	A	C	1.472	0.2	0.05463	0.060301	0.418261	1.13871
10	5349871	C	T	3.086	0.4	0.04927	0.063197	0.647797	2.14568e-53
4	75502487	T	C	1.319	0.36	0.03616	0.063197	0.691931	0.185214
12	58162739	A	G	7.068	0.53	0.10702	0.320204	0.829858	0
10	123337335	A	G	3.244	0.24	0.07774	0.120825	0.602934	1.09754
3	189401776	G	C	12.89	0.55	0.41206	0.063197	0.737281	0.345882
11	103660567	T	C	3.444	0.29	0.1808	0.063197	0.73592	3.14914e-08
6	53924697	T	C	11.16	0.42	0.87844	0.060301	0.799587	1.61742
6	7102084	T	C	3.491	0.49	0.07212	0.060301	0.471346	0.79723
4	145262927	C	T	0.168	0.32	0.0363	0.060301	0.439908	6.04753e-67
15	40717302	G	A	4.819	0.19	0.15552	0.060301	0.541507	0.00286289
9	22096055	A	G	3.635	0.36	0.12801	0.060301	0.760437	7.35636e-19
8	55421614	G	A	7.834	0.25	0.72781	0.063197	0.526961	1.93754e-29
6	29434414	G	A	2.052	0.1	0.0911	0.063197	0.289855	0.185214
1	118883973	G	A	3.869	0.46	0.13146	0.063197	0.402414	1.704e-18
10	64490495	C	T	1.476	0.29	0.08989	0.060301	0.511546	7.9e-93
10	94481917	G	A	5.642	0.79	0.13557	0.060301	0.776143	1.86765e-38
11	92722761	G	A	3.235	0.23	0.09136	0.060301	0.5969	2.01661e-29
14	66036795	G	A	0.888	0.37	0.03387	0.063197	0.549979	0.148273
6	136001003	C	A	5.344	0.3	0.05977	0.063197	0.267886	1.20907e-40
3	130137471	G	A	2.69	0.46	0.17084	0.063197	0.439832	0.00286289
15	69991417	G	A	0.093	0.23	0.04577	0.063197	0.535604	4.68523e-123
17	27769598	G	A	1.134	0.37	0.06482	0.081037	0.1816	0.820004
1	152550018	T	G	1.586	0.28	0.2303	0.063197	0.395255	0.185214
12	355842	C	T	1.689	0.37	0.05582	0.060301	0.373694	0.00286289
5	10752315	C	T	9.429	0.23	0.14607	0.060301	0.730781	0.870542
20	1924707	C	T	2.792	0.37	0.10917	0.056003	0.420851	0.185214
10	123346116	G	A	3.797	0.23	0.07513	0.060301	0.779401	0.912327
16	539140	C	A	6.076	0.18	0.03326	0.083675	0.505062	0.208878
14	70347348	A	G	14.64	0.36	0.81783	0.125351	0.577213	1.42288
1	113189053	G	A	4.204	0.47	0.02115	0.060301	0.288496	1.29083
8	12979400	G	A	4.396	0.2	0.08778	0.091713	0.792033	0.0625422
2	25301755	A	T	4.842	0.25	0.1338	0.091713	0.753576	0.980302
15	92858101	G	A	5.404	0.21	0.14732	0.060301	0.817935	5.54924e-26
1	10556097	G	A	0.412	0.22	0.1338	0.087872	0.628931	0.802175
22	30592487	C	G	11.71	0.3	0.94767	0.128841	0.655983	0.800647
7	116191301	C	A	6.98	0.23	0.1834	0.060301	0.768369	0.883303
8	6323278	G	A	2.127	0.32	0.09443	0.060301	0.75952	0.188077
14	97103807	G	A	0.308	0.15	0.05407	0.060301	0.255807	1.60194e-56
10	105846074	A	G	4.607	0.53	0.19705	0.060301	0.599274	0.185214
4	15397906	G	A	2.286	0.26	0.09979	0.050388	0.684101	0.800093
22	40652873	A	G	6.208	0.25	0.10024	0.099841	0.714784	0.746617
14	72417326	C	G	5.865	0.33	0.14545	0.063197	0.674001	0.12696
17	39897264	A	T	0.625	0.27	0.02787	0.060301	0.713228	0.679798
5	158829527	A	T	1.458	0.33	0.1922	0.063197	0.705511	0.185214
13	40118068	C	A	2.386	0.25	0.09358	0.060301	0.251651	0.0964537
20	9365303	T	C	10.33	0.16	0.04243	0.121303	0.72338	1.05351
10	105672842	G	A	1.626	0.31	0.09688	0.060301	0.552017	0.226462
16	55341135	T	C	0.851	0.36	0.1444	0.063197	0.539873	2.24973e-110
17	46840541	T	G	6.056	0.23	0.16155	0.056003	0.703329	0.0028629
6	116443735	T	A	5.252	0.15	0.14709	0.060301	0.655288	0.106622
1	108366016	T	C	5.861	0.43	0.10564	0.060301	0.767815	0.549188
11	102716980	A	G	0.088	0.45	0.06841	0.060301	0.243157	0.185214
12	111887659	A	G	3.488	0.4	0.16428	0.320204	0.729281	0.981702
17	64303793	C	T	3.628	0.19	0.12555	0.060301	0.471129	0.989128
2	61224259	C	T	1.425	0.43	0.06946	0.083675	0.287034	0.679798
11	31210771	G	A	3.689	0.27	0.07317	0.063197	0.707788	0.148273
14	65475540	C	A	2.852	0.28	0.12293	0.060301	0.43214	1.002
5	32768634	A	G	6.848	0.52	0.12628	0.063197	0.480832	1.54628
18	43202404	C	T	4.87	0.33	0.02834	0.060301	0.572333	0.0625422
12	21382619	T	C	2.496	0.29	0.08221	0.063197	0.502674	0.00286289
2	234827661	G	A	3.559	0.19	0.14809	0.063197	0.628696	0.00286289
7	116358044	A	G	3.678	0.39	0.12028	0.060301	0.605078	1.75578
16	79749276	G	A	0.802	0.34	0.13047	0.063197	0.570169	0.185214
6	32961361	G	A	1.35	0.3	0.12091	0.060301	0.638145	1.18368e-55
3	133537067	A	G	5.012	0.14	0.13207	0.121303	0.764616	1.52438
13	113536627	A	G	1.919	0.32	0.05835	0.283776	0.441854	0.188077
19	49118371	G	A	7.115	0.45	0.45147	0.064036	0.490839	0.79723
7	28196222	A	G	1.293	0.35	0.14269	0.060301	0.260948	0.52998
4	88799710	T	C	7.751	0.35	0.07701	0.060301	0.86903	1.7644e-16
8	26206077	C	T	1.865	0.25	0.06628	0.060301	0.256678	0.748779
12	6291093	G	A	1.641	0.34	0.16661	0.060301	0.5267	1.16163
19	52127744	A	G	1.337	0.16	0.13072	0.063197	0.425484	0.993939
6	31274380	T	C	2.592	0.64	0.04104	0.063197	0.71447	1.58934e-22
10	92592956	C	A	8.815	0.24	0.28261	0.121303	0.735634	1.72108
11	12698040	A	G	7.533	0.34	0.22719	0.090647	0.612095	1.47703
1	26741544	A	G	7.528	0.24	0.32126	0.090647	0.679136	0.929673
15	37349802	T	C	19.39	0.61	0.98865	0.060301	0.819956	1.37522
22	40876234	T	C	5.677	0.42	0.16455	0.060301	0.711466	0.492101
8	135637337	C	G	2.218	0.3	0.12415	0.060301	0.494195	0.188077
19	17902334	T	C	0.175	0.32	0.09268	0.081037	0.273172	0.79723
2	239349362	G	A	0.987	0.4	0.05309	0.099841	0.485856	0.269968
16	86017663	G	A	2.265	0.34	0.153	0.074216	0.659822	0.986595
19	11342703	A	G	9.819	0.39	0.03585	0.121787	0.91141	0.188077
5	176517326	T	C	4.742	0.12	0.10328	0.283776	0.620555	1.10823
10	67966574	G	C	2.636	0.43	0.10234	0.063197	0.726406	0.243943
16	58622178	G	A	3.97	0.31	0.0455	0.121303	0.813387	0.637233
1	156197380	C	T	1.576	0.27	0.06212	0.121303	0.911304	0.960762
21	16817051	A	G	3.856	0.45	0.80985	0.134018	0.465271	1.10412
8	109228008	A	G	2.677	0.18	0.09213	0.121303	0.392602	0.820004
9	126446778	G	A	4.812	0.32	0.14541	0.063197	0.333187	0.57833
6	34194866	C	T	5.884	0.38	0.2223	0.128841	0.475439	1.77479
1	180962282	A	G	2.717	0.33	0.05536	0.128073	0.773383	0.462695
2	121089731	T	C	21.8	0.42	0.98572	0.060301	0.824448	1.60453
3	27537909	T	C	4.823	0.44	0.10484	0.060301	0.796864	1.36396e-17
4	10726853	C	T	1.95	0.18	0.07408	0.063197	0.481162	3.40587e-77
4	145436324	T	C	12.58	0.29	0.13524	0.063197	0.900408	3.98812e-22
5	131699867	A	G	10.24	0.28	0.19678	0.060301	0.856041	0.185214
5	150458146	C	T	14.99	0.28	0.17033	0.060301	0.930859	1.3087
7	150647969	C	T	8.049	0.161914	0.14027	0.074216	0.880962	0.57833
6	111747083	G	C	0.71	0.34	0.06234	0.060301	0.31536	0.637233
2	102986222	G	A	1.047	0.15	0.05301	0.063197	0.37596	0.12696
1	70335682	T	C	8.225	0.26	0.06753	0.063197	0.788896	0.330576
6	105406274	A	C	6.368	0.2	0.74526	0.090647	0.497441	0.810863
1	19321495	C	T	5.883	0.26	0.20751	0.060301	0.382883	0.622787
9	100550028	T	C	4.419	0.35	0.04007	0.060301	0.580431	0.104617
17	61763031	G	C	0.989	0.15	0.101	0.125526	0.48224	0.976418
1	65695930	G	A	1.344	0.46	0.12288	0.283776	0.479252	0.247757
7	110898915	T	C	1.511	0.28	0.07462	0.060301	0.611973	0.306886
10	5354677	G	A	9.194	0.2	0.05198	0.063197	0.882895	2.56921e-84
6	142679572	G	A	3.353	0.31	0.14347	0.060301	0.197675	0.763545
1	218604678	G	A	0.907	0.42	0.06699	0.060301	0.502044	2.4684
2	103054767	G	A	3.015	0.17	0.12837	0.063197	0.434549	0.0847532
10	114726843	G	A	8.5	0.3	0.12126	0.128073	0.795361	0.549175
9	119249339	C	G	0.749	0.08	0.09311	0.060301	0.397163	0.148273
4	145485738	C	T	12.83	0.52	0.12561	0.060301	0.769588	0.185214
11	46743247	T	C	2.871	0.27	0.16715	0.060301	0.730747	0.718206
11	59997666	C	T	0.216	0.3	0.04024	0.063197	0.16461	0.00286289
3	169100899	G	A	2.863	0.27	0.04627	0.063197	0.48322	0.462695
7	73017005	A	G	2.954	0.23	0.05049	0.059349	0.526639	0.353412
6	32578082	C	T	15.06	0.49	0.21715	0.090647	0.846395	1.42002
1	85797110	A	G	6.219	0.46	0.34391	0.060301	0.72076	1.11489
2	230224031	T	C	1.028	0.29	0.06509	0.063197	0.344557	0.148273
1	114173410	A	G	5.53	0.34	0.06782	0.106748	0.211611	0.51579
8	18272438	C	T	2.066	0.18	0.06573	0.060301	0.414536	1.20483e-34
6	126767600	C	T	21.3	0.48	0.82125	0.063197	0.742942	1.61456
16	15132108	A	G	5.418	0.15	0.11189	0.128073	0.637786	0.462695
14	49463484	A	G	2.721	0.35	0.07666	0.063197	0.456847	1.69273e-34
11	55862091	T	C	0.141	0.22	0.04301	0.063197	0.402302	1.45879e-43
4	156511459	G	T	4.92	0.34	0.56828	0.063197	0.43418	0.622787
4	89064581	A	C	8.594	0.18	0.11008	0.060301	0.8103	0.372955
15	53279378	A	G	2.386	0.35	0.08487	0.060301	0.524676	2.99129e-50
1	203155882	G	C	0.365	0.78	0.13685	0.091966	0.47332	0.333487
4	146821410	C	A	13.07	0.29	0.49403	0.091713	0.825621	0.333487
5	40791884	C	T	8.056	0.35	0.27952	0.083675	0.733498	1.50392
12	56416928	A	C	0.824	0.24	0.13521	0.083675	0.52104	0.499125
6	138199417	G	T	1.015	0.26	0.16406	0.060301	0.585039	1.47703
6	32218989	G	A	0.143	0.3	0.03204	0.060301	0.636681	6.52985e-58
20	35637398	G	A	1.398	0.24	0.04945	0.060301	0.56763	1.713
15	66070693	C	T	1.825	0.32	0.08244	0.063197	0.286884	1.7881
8	55327091	G	A	3.005	0.33	0.15832	0.063197	0.66954	5.24674e-43
1	205914757	A	G	5.271	0.27	0.0976	0.060301	0.701582	6.63552e-41
8	134145512	G	A	9.439	0.53	0.28918	0.060301	0.716713	1.10417
1	177855517	C	A	8.186	0.41	0.1376	0.063197	0.823988	0.18522
12	57844049	C	T	1.937	0.47	0.07467	0.083675	0.430423	0.260237
4	89243818	C	T	2.786	0.24	0.06685	0.060301	0.385337	7.58814e-31
13	113793849	G	A	5.107	0.51	0.22477	0.060301	0.586751	2.04471
5	157804457	C	T	3.061	0.39	0.09917	0.063197	0.710346	4.77531e-53
12	112645401	G	A	4.069	0.43	0.1103	0.125526	0.542185	0.188077
2	234184417	G	A	20.1	0.67	0.94754	0.137589	0.879313	1.02076
3	121793187	C	A	2.312	0.31	0.17391	0.063197	0.427202	0.647909
1	114303808	C	A	5.839	0.39	0.21233	0.059349	0.656907	5.40469e-39
11	30768678	C	T	3.394	0.34	0.1865	0.060301	0.538158	1.05441e-18
11	47663049	A	G	2.871	0.21	0.11223	0.090647	0.399266	0.945503
1	19841174	G	A	17.83	0.57	0.89863	0.060301	0.705155	0.808001
8	128323181	T	C	3.118	0.24	0.10097	0.063197	0.734658	6.30291e-83
12	21352315	A	G	6.535	0.25	0.17206	0.063197	0.832791	0.624957
4	11630049	T	C	1.189	0.13	0.18012	0.060301	0.491461	0.185214
9	136154304	C	T	9.008	0.25	0.25928	0.059349	0.805734	0.185214
3	87241497	C	T	2.072	0.38	0.12655	0.060301	0.433432	2.77411e-75
10	5161955	A	G	7.817	0.2	0.52383	0.063197	0.746455	0.622787
1	76106675	T	C	1.169	0.28	0.02965	0.060301	0.362295	4.07623e-32
15	94141833	T	G	14.23	0.27	0.09337	0.060301	0.917548	2.13287e-12
10	65274927	A	G	2.544	0.38	0.12665	0.250983	0.536955	0.79723
1	206946634	A	G	0.133	0.77	0.08869	0.063197	0.321156	0.185214
6	10982359	G	A	1.706	0.35	0.07056	0.063197	0.511193	0.306886
22	29451671	A	G	16.02	0.57	0.91522	0.209056	0.851689	1.56829
7	150919829	G	A	8.018	0.43	0.22821	0.137589	0.731164	1.3622
10	9328651	C	T	7.397	0.39	0.11879	0.063197	0.482174	0.185214
20	10639543	G	A	6.796	0.27	0.05853	0.121303	0.354252	0.883024
2	62551472	A	G	0.125	0.43	0.01718	0.060301	0.110433	6.63552e-41
8	133929917	C	T	4.759	0.27	0.042	0.063197	0.820939	0.296164
1	182021283	C	T	14.54	0.51	0.16365	0.083675	0.842323	0.988044
3	170725542	G	A	8.345	0.41	0.28878	0.063197	0.571554	0.749746
12	125261593	C	T	2.333	0.21	0.09155	0.060301	0.761708	0.372955
18	44752238	G	C	0.132	0.24	0.08519	0.060301	0.483222	0.00286289
12	12834894	C	A	5.637	0.23	0.16435	0.059349	0.713355	0.492101
1	22702858	G	T	1.229	0.47	0.12198	0.091713	0.506225	9.84265e-62
6	27560587	A	G	1.534	0.58	0.99476	0.172434	0.530239	1.79447
1	237048676	G	T	6.756	0.23	0.18866	0.060301	0.703829	0.148273
6	160681393	A	G	0.779	0.53	0.04992	0.060301	0.379868	0.00286289
11	17160148	A	G	5.63	0.47	0.15072	0.059349	0.621317	1.07025
16	163598	G	A	8.137	0.92	0.92112	0.134018	0.560597	2.89087
1	199965168	G	A	0.205	0.22	0.03768	0.060301	0.346319	1.41616e-47
6	31240431	G	T	6.918	0.21	0.07702	0.125351	0.828986	1.63872
17	68190826	G	A	5.659	0.29	0.10382	0.063197	0.740297	2.7523e-41
13	102965003	A	G	7.001	0.48	0.50887	0.063197	0.783953	0.810527
14	73081068	A	G	8.279	0.31	0.66068	0.060301	0.693394	0.587086
20	46095649	G	A	0.515	0.41	0.10308	0.060301	0.646084	0.185214
4	73515825	C	T	1.98	0.37	0.18677	0.063197	0.481192	0.622787
10	46024729	A	G	2.786	0.13	0.02064	0.060301	0.235042	0.746617
11	43648368	T	G	5.793	0.26	0.06475	0.063197	0.723412	0.708978
6	29906691	A	G	0.931	0.2	0.02655	0.076284	0.263439	0.185214
4	9978305	C	G	0.021	0.27	0.07068	0.063197	0.310421	0.492101
14	79945162	A	G	1.244	0.29	0.1287	0.060301	0.561087	0.333487
5	168256240	G	A	19.17	0.56	0.92341	0.091372	0.754271	0.956274
1	192541021	G	A	5.897	0.47	0.09009	0.063197	0.456854	1.2707
16	53820527	T	A	14.92	0.34	0.92855	0.083675	0.637179	1.08548
9	22003367	G	A	2.15	0.35	0.07776	0.091372	0.633324	0.445452
6	32668100	G	A	4.287	0.37	0.04595	0.060301	0.56824	0.00103308
9	4291747	C	G	10.78	0.27	0.05008	0.063197	0.581481	0.870543
6	31258837	G	A	3.71	0.26	0.07301	0.060301	0.718139	0.185214
21	30717737	T	C	0.854	0.4	0.21016	0.083675	0.748004	0.616798
15	79111093	C	T	2.39	0.26	0.08652	0.060301	0.777107	0.855202
1	196686918	G	A	3.89	0.28	0.08591	0.135981	0.299059	0.345882
1	220973563	C	T	3.847	0.25	0.05415	0.060301	0.750971	0.188077
6	32625869	T	C	0.066	0.32	0.11022	0.060301	0.37484	0.185214
1	95697529	A	C	6.122	0.31	0.29595	0.060301	0.686222	0.810864
9	80076247	G	A	1.511	0.2	0.04037	0.091713	0.604934	0.690876
19	10218030	C	T	4.964	0.36	0.10244	0.100691	0.562695	1.67484
11	24403620	G	A	0.482	0.28	0.06074	0.060301	0.3793	2.96455e-62
2	85794297	T	C	2.179	0.28	0.08238	0.091372	0.324681	0.626006
10	65104500	A	G	3.854	0.34	0.05141	0.060301	0.745069	0.187741
22	30337586	T	C	7.638	0.37	0.03044	0.060301	0.720657	0.394092
4	38784724	T	A	1.793	0.39	0.04588	0.048193	0.675198	0.51579
6	31136453	A	G	2.291	0.22	0.04483	0.151085	0.512579	1.6552
5	147845815	A	C	2.497	0.21	0.21178	0.060301	0.797922	1.36099
5	172664163	G	A	5.083	0.41	0.19502	0.127595	0.594494	0.97935
12	15735442	G	A	1.573	0.29	0.12201	0.063197	0.625881	0.493601
8	101024505	A	C	12	0.4	0.11887	0.060301	0.909281	0.0625422
2	219472325	G	A	7.143	0.55	0.2807	0.091713	0.412433	1.3826
2	210874246	T	C	13.62	0.47	0.2007	0.082826	0.887359	0.70754
2	1777150	A	G	3.912	0.36	0.0851	0.060301	0.294196	0.185214
14	22481824	A	C	2.279	0.33	0.86897	0.063197	0.3012	0.185214
12	123822711	G	A	2.537	0.3	0.15189	0.128073	0.519712	0.269968
14	95720678	T	A	0.394	0.32	0.02489	0.091713	0.42049	0.333487
6	31870326	G	A	8.408	0.46	0.09546	0.182457	0.676682	1.25993
6	32855717	G	A	12.89	0.2	0.04853	0.060301	0.89311	5.23248e-11
16	20367690	G	T	12.92	0.43	0.95991	0.060301	0.754857	1.69931
9	12521826	G	A	1.319	0.3	0.11083	0.063197	0.661089	2.47115e-38
2	56089540	A	G	5.61	0.4	0.17131	0.063197	0.393983	1.05747
1	197325908	T	G	1.835	0.6	0.13236	0.074216	0.532617	1.11114
17	53056471	G	A	1.777	0.36	0.0458	0.060301	0.450576	0.865012
14	35682172	T	C	5.516	0.39	0.10783	0.060301	0.51416	0.796488
12	20230639	A	G	18.8	0.4	0.97552	0.063197	0.862088	0.808001
6	32677912	C	T	4.891	0.21	0.05139	0.060301	0.483884	1.01059e-48
4	72138216	G	A	6.866	0.24	0.30393	0.060301	0.356841	0.790984
10	104591393	G	T	1.832	0.33	0.16046	0.066767	0.656745	0.269968
1	205638222	G	A	4.115	0.46	0.38519	0.108573	0.512775	0.945503
6	32520907	T	C	0.214	0.36	0.06027	0.060301	0.28448	0.185214
7	83656800	T	C	3.948	0.44	0.14435	0.060301	0.768535	0.148274
5	8652870	T	C	3.038	0.22	0.08865	0.063197	0.643518	1.5833e-36
18	67516846	A	C	0.218	0.35	0.07292	0.063197	0.46791	0.12696
1	157670816	A	G	1.425	0.76	0.08965	0.060301	0.347671	0.0625422
9	99161512	C	G	2.486	0.41	0.07409	0.087872	0.673092	0.945503
10	8104722	C	T	7.99	0.35	0.17783	0.104817	0.703403	1.12448
6	32208324	C	T	0.625	0.25	0.06152	0.060301	0.543792	1.06276e-52
1	205723572	C	T	2.732	0.37	0.14737	0.060301	0.569044	2.04981e-74
19	1124031	G	A	1.61	0.14	0.06272	0.074216	0.596515	0.931831
5	72431482	G	C	0.365	0.4	0.18585	0.050388	0.38391	1.08874
18	43187130	A	G	10.59	0.29	0.2709	0.060301	0.794839	0.870543
10	63467553	G	C	0.105	0.32	0.08546	0.063197	0.460579	0.00286289
19	41363765	T	C	2.113	0.26	0.03776	0.060301	0.461626	0.00286289
19	35555190	T	C	4.828	0.21	0.09554	0.068591	0.812554	0.333487
1	177913519	T	C	0.439	0.28	0.07034	0.060301	0.280255	0.188077
10	101795361	T	A	1.376	0.43	0.02493	0.076284	0.0871779	1.41154e-38
2	25492467	A	G	7.817	0.41	0.21084	0.091713	0.82668	1.26561
16	14388305	G	A	2.731	0.25	0.05759	0.060301	0.71025	6.83528e-37
2	121245122	T	C	4.05	0.4	0.14906	0.056003	0.396217	0.185214
4	31151357	G	A	5.509	0.39	0.14831	0.063197	0.672668	1.61859e-60
14	75960536	A	G	2.569	0.35	0.14697	0.060301	0.823136	2.8514e-16
12	115381740	G	A	2.792	0.4	0.14468	0.063197	0.287874	6.34591e-16
10	119379656	A	G	2.407	0.4	0.10682	0.091245	0.303697	2.43313e-179
2	43540125	T	G	19.25	0.59	0.92366	0.063197	0.817982	2.41104
2	65208074	G	A	1.424	0.33	0.04646	0.060301	0.719668	8.03006e-138
1	177280121	C	T	11.15	0.38	0.8477	0.063197	0.365367	0.622787
4	74319283	T	G	6.042	0.45	0.19143	0.110377	0.617583	0.763545
4	79513215	A	G	2.69	0.23	0.18839	0.060301	0.440305	0.353412
6	51068717	C	T	5.673	0.33	0.06611	0.063197	0.67477	5.40618e-101
9	127570640	T	C	11.75	0.43	0.59962	0.074216	0.83866	1.38633
1	20200990	A	G	0.838	0.38	0.02695	0.060301	0.322577	6.63552e-41
17	47445751	G	A	4.908	0.21	0.08196	0.067067	0.361233	0.185214
3	182760073	T	G	3.69	0.23	0.15355	0.125526	0.481211	0.57833
7	50469981	T	C	2.095	0.35	0.14972	0.060301	0.644612	0.802175
14	61940675	G	A	0.99	0.08	0.05522	0.060301	0.357632	0.660303
3	11400249	C	T	6.378	0.3	0.13171	0.060301	0.710751	0.388575
7	94954696	C	G	4.72	0.87	0.14742	0.063197	0.618213	0.12696
4	187149540	G	A	1.301	0.33	0.09936	0.091713	0.444947	0.330576
9	113807082	C	T	7.669	0.31	0.27506	0.063197	0.586719	3.42258e-17
1	2501338	C	T	1.775	0.16	0.05998	0.067067	0.723306	2.90387e-54
2	68070225	A	G	3.244	0.26	0.12167	0.060301	0.632456	0.185214
8	78160179	T	C	1.956	0.25	0.05259	0.063197	0.558705	6.70449e-45
9	113915905	T	C	5.574	0.3	0.1403	0.063197	0.796802	2.09093e-43
5	131756058	A	G	1.411	0.18	0.06843	0.112256	0.333597	0.800093
10	100127551	G	A	4.118	0.34	0.17414	0.091713	0.601827	0.185214
2	60620286	T	A	17.53	0.45	0.94731	0.060301	0.836345	0.622787
5	173279842	C	T	0.615	0.31	0.09762	0.060301	0.698734	0.185214
22	37505552	C	T	13.57	0.78	0.25308	0.074216	0.787884	1.72323
22	50966914	T	C	6.41	0.25	0.13843	0.068936	0.429541	1.25993
4	89872176	G	A	0.017	0.5	0.03514	0.083675	0.574123	0.333487
11	100173537	A	G	4.405	0.48	0.14339	0.063197	0.614953	0.00286289
2	228135180	A	G	7.305	0.15	0.0652	0.063197	0.784059	0.50327
15	28196821	T	C	3.327	0.28	0.04126	0.078125	0.627379	1.13518
10	44753867	T	C	0.847	0.22	0.06801	0.048193	0.418841	0.185214
16	240280	A	C	0.166	0.27	0.13374	0.17184	0.460081	0.599268
5	150473674	A	G	4.052	0.41	0.18196	0.110181	0.57113	0.79723
3	185511687	G	T	0.12	0.51	0.07683	0.114383	0.43013	0.312174
12	117002658	G	A	0.324	0.26	0.06222	0.060301	0.181122	1.82708
10	65133822	A	G	5.144	0.35	0.14144	0.060301	0.707928	0.187741
9	4267209	A	G	4.193	0.39	0.16064	0.063197	0.717007	0.0982429
11	270715	T	C	0.187	0.31	0.05509	0.091713	0.242474	4.22497e-83
10	72114378	T	C	2.17	0.31	0.11343	0.060301	0.481229	2.34353
4	75223711	A	G	4.743	0.32	0.18206	0.063197	0.74765	0.000208852
18	57828637	G	A	1.075	0.45	0.06045	0.063197	0.479986	7.94745e-134
7	120962164	A	G	2.698	0.28	0.06131	0.060301	0.543108	0.185214
10	2789594	A	C	1.568	0.34	0.05312	0.063197	0.293189	3.56033e-40
3	87110674	T	C	2.813	0.44	0.15354	0.063197	0.374028	5.06494e-34
11	58339124	T	C	1.024	0.26	0.19448	0.060301	0.55686	1.5701
21	44478497	C	T	1.572	0.16	0.10844	0.320204	0.727781	0.834929
11	78095373	C	A	3.728	0.44	0.05914	0.083675	0.509259	0.696686
11	10390581	G	A	2.675	0.21	0.05864	0.083675	0.700857	0.306886
14	69314059	G	A	0.596	0.39	0.0671	0.060301	0.446171	1.29137e-50
15	69059084	T	A	4.042	0.31	0.10009	0.063197	0.348851	4.58182e-37
5	54944262	C	T	3.625	0.13	0.04457	0.060301	0.431755	0.148273
5	97969453	T	C	0.445	0.26	0.08243	0.060301	0.687251	2.21692e-143
7	25991826	T	C	13.88	0.39	0.34035	0.15397	0.895327	0.991772
17	68259446	A	G	0.776	0.33	0.02987	0.063197	0.436413	6.475e-47
2	223068286	G	A	1.933	0.36	0.05934	0.063197	0.376481	0.692372
14	60920525	A	T	0.678	0.25	0.06296	0.060301	0.597628	0.00286289
2	25158008	T	C	0.247	0.19	0.07108	0.060301	0.349273	8.18444e-68
12	45930973	C	G	2.951	0.34	0.11717	0.060301	0.561632	9.79991e-99
6	167177422	G	A	2.549	0.17	0.1269	0.076284	0.592494	1.17434
19	51364623	A	G	0.302	0.19	0.02673	0.060301	0.315133	0.185214
6	127493611	A	T	12.07	0.37	0.09564	0.063197	0.886325	0.625185
6	32433167	G	T	0.207	0.31	0.0588	0.060301	0.583119	3.63968e-64
8	56599548	G	A	1.105	0.31	0.06807	0.060301	0.502941	5.92375e-59
1	197781198	C	T	5.351	0.42	0.17141	0.091713	0.382618	0.808
17	47566312	G	A	16.55	0.33	0.62514	0.060301	0.862209	0.977021
2	213296863	T	C	3.949	0.42	0.15443	0.063197	0.602596	1.2725
3	39523003	T	C	1.775	0.09	0.03348	0.063197	0.692241	0.00286289
6	30017071	T	C	0.522	0.16	0.03056	0.060301	0.149066	0
7	144074929	G	A	1.445	0.24	0.12282	0.083675	0.499604	0.312174
9	123640500	T	C	9.481	0.29	0.0643	0.125351	0.365873	4.32395
11	8604593	T	C	3.62	0.3	0.11371	0.060301	0.705169	0.49042
18	60793549	C	T	0.888	0.54	0.12899	0.078618	0.630359	1.06282
14	105729792	G	A	1.746	0.34	0.04373	0.099915	0.439583	1.13363
2	31402407	G	A	2.767	0.1	0.06809	0.063197	0.444471	0.00286289
12	66338202	G	T	1.009	0.42	0.14719	0.060301	0.423695	0.429157
2	203532304	A	G	0.115	0.28	0.05677	0.060301	0.566633	0.00286289
19	4768917	A	G	2.516	0.45	0.33911	0.091966	0.517022	0.185214
5	78316476	C	T	4.062	0.3	0.15963	0.060301	0.580548	0.00286289
2	234672722	T	G	0.14	0.25	0.14021	0.060301	0.616797	1.13927
6	152285687	G	T	2.039	0.19	0.07363	0.063197	0.575342	1.17115
6	159465977	T	C	9.131	0.63	0.6304	0.060301	0.759597	1.48256
21	32918294	C	T	3.301	0.22	0.121	0.060301	0.454697	0.587755
7	28180556	T	C	0.232	0.41	0.08668	0.060301	0.411581	0.344766
7	2017445	C	T	2.564	0.24	0.06964	0.074216	0.565844	1.05155
9	137440528	G	A	0.474	0.17	0.04621	0.074216	0.474765	0.185214
14	91442779	T	C	1.862	0.33	0.07014	0.060301	0.686177	0.841489
15	58723675	C	T	3.354	0.83	0.25496	0.060301	0.504107	0.892754
15	89042467	C	T	19.31	0.54	0.86089	0.083675	0.733906	1.60204
6	383546	C	T	0.058	0.44	0.08302	0.060301	0.451938	1.10942
6	135423209	T	C	0.828	0.22	0.05902	0.063197	0.478736	0.306886
14	53400629	T	C	5.796	0.44	0.11886	0.059349	0.796015	0.726384
2	83293380	C	T	0.927	0.35	0.0515	0.060301	0.6406	1.13079e-76
16	50756881	A	G	5.106	0.35	0.1542	0.083675	0.754892	0.372955
10	46013277	A	C	2.031	0.34	0.09348	0.060301	0.778885	0.746617
6	128390980	T	C	6.655	0.39	0.08566	0.060301	0.726564	1.14428
16	73029160	T	C	5.563	0.42	0.13461	0.050388	0.706742	1.67157
16	11179873	A	G	4.914	0.39	0.12105	0.060301	0.488789	0.57833
1	208024820	C	T	6.165	0.35	0.15416	0.078125	0.585664	1.10674e-29
11	69328764	C	T	0.461	0.33	0.06179	0.060301	0.350669	0.185214
11	85800279	G	A	19.54	0.56	0.78911	0.060301	0.714246	0.622787
6	31327701	T	G	5.138	0.21	0.1048	0.121075	0.600525	5.29407e-31
8	23777006	A	G	0.586	0.38	0.06651	0.060301	0.261586	1.06915e-93
19	44888276	T	C	0.655	0.47	0.0518	0.063197	0.338601	0.00286289
14	55614636	G	A	8.851	0.43	0.19189	0.137589	0.696018	0.622787
6	54756308	C	T	4.169	0.38	0.10689	0.063197	0.606654	0.148273
2	192015072	A	G	5.096	0.35	0.1438	0.125351	0.352906	1.43989
8	128093297	C	T	0.457	0.27	0.24725	0.063197	0.414437	1.79923
2	219010146	C	T	0.217	0.43	0.15307	0.060301	0.728599	0.988859
11	58472799	C	A	3.117	0.21	0.06212	0.063197	0.105117	0.168198
12	112817783	T	A	9.702	0.4	0.31159	0.060301	0.529872	1.61742
11	109378071	C	T	4.354	0.49	0.14381	0.063197	0.798968	0.00153992
11	113392994	C	T	7.353	0.31	0.26371	0.063197	0.567808	0.622787
4	88030261	G	T	1.582	0.33	0.1074	0.128073	0.605861	0.865012
3	32941852	G	T	0.858	0.36	0.08836	0.283776	0.840308	0.79723
12	1638171	A	G	9.025	0.39	0.1002	0.104817	0.713998	0.417219
12	101742180	T	C	10.75	0.28	0.08959	0.121303	0.906495	0.809468
21	44593140	A	G	0.474	0.27	0.11481	0.182457	0.188897	0.429157
9	138529722	G	C	0.687	0.2	0.03314	0.060301	0.413452	0.148273
6	32592737	A	G	1.277	0.24	0.09363	0.063197	0.787436	1.45447
20	57614002	A	G	5.52	0.33	0.1314	0.060301	0.739984	0.148273
2	151637936	C	G	2.345	0.25	0.05779	0.063197	0.432245	1.09476e-48
11	65249145	A	G	2.801	0.45	0.25131	0.135981	0.712668	0.79723
1	200101920	A	G	0.01	0.36	0.02486	0.060301	0.316116	0.554527
11	2484803	T	C	12.11	0.36	0.11267	0.074216	0.851727	2.04955
10	122522381	G	T	0.872	0.3	0.10516	0.060301	0.664877	3.74618e-21
4	5368224	G	T	1.423	0.3	0.17215	0.078125	0.586629	0.839144
12	123796238	C	T	5.681	0.3	0.07963	0.121303	0.781056	0.0847532
16	20491058	C	T	1.12	0.21	0.05473	0.063197	0.515034	0.00286289
10	62179812	C	T	4.153	0.38	0.10627	0.091372	0.674786	0.345882
19	33181484	C	T	11.01	0.34	0.11208	0.056003	0.878968	0.185214
16	11177801	A	G	2.931	0.28	0.03958	0.060301	0.724469	0.57833
16	20449616	A	G	5.684	0.12	0.05262	0.063197	0.835994	0.188077
19	33599127	T	C	2.667	0.31	0.04744	0.060301	0.349595	0.281668
7	100453208	T	C	4.203	0.37	0.10257	0.292756	0.631582	0.333487
6	31572956	A	C	0.639	0.31	0.08023	0.060301	0.655404	1.8845e-26
2	44073656	T	C	0.702	0.44	0.10788	0.060301	0.295774	0.12696
11	35329615	G	T	1.871	0.44	0.16834	0.060301	0.425467	0.106622
7	107244545	C	T	3.054	0.51	0.06776	0.083675	0.388174	0.106622
14	36738361	C	T	17.85	0.54	0.92295	0.134018	0.834593	2.52119
9	126783847	C	T	2.567	0.26	0.14289	0.104817	0.636843	0.679798
7	46402269	C	A	5.161	0.3	0.10522	0.060301	0.737343	6.42409e-13
14	64235556	G	T	1.943	0.38	0.07006	0.060301	0.526597	0.185214
1	172862234	A	G	6.419	0.4	0.19675	0.063197	0.79565	1.42002
16	28517709	T	C	0.819	0.2	0.04441	0.060301	0.213992	0.333487
6	31440669	C	G	5.271	0.21	0.12071	0.083675	0.677217	1.0674e-15
3	36856030	T	C	12.65	0.35	0.12697	0.060301	0.728756	0.185214
20	3193893	A	C	13.41	0.36	0.14815	0.125526	0.751682	0.0847532
7	150622162	T	C	4.87	0.45	0.14442	0.060301	0.570029	0.372855
12	47880149	C	T	10.99	0.41	0.33737	0.063197	0.729254	3.10321e-41
12	122625992	A	G	2.65	0.1	0.0736	0.125526	0.490953	0.187741
2	45188353	C	T	4.988	0.37	0.03369	0.056003	0.682185	0.7723
22	30486826	A	G	1.271	0.28	0.03843	0.063197	0.74491	0.00286289
19	45396665	G	T	1.456	0.14	0.13767	0.12342	0.575225	1.67057
9	22034719	G	A	2.345	0.38	0.13061	0.060301	0.713266	1.37552e-28
1	67597977	T	C	2.892	0.2	0.02809	0.060301	0.305015	0.00286289
19	45403412	C	T	0.918	0.27	0.13925	0.12342	0.426923	0.679798
20	2281970	G	A	4.908	0.48	0.08928	0.060301	0.510261	0.881983
5	40410584	T	C	13.18	0.36	0.09968	0.063197	0.745399	0.79723
3	128260550	C	T	2.014	0.21	0.07638	0.063197	0.376955	5.48171e-29
1	159678816	C	T	2.097	0.48	0.06206	0.063197	0.715368	5.60084e-76
9	22136489	A	T	15.8	0.5	0.91308	0.063197	0.788763	0.808001
7	1285195	A	T	0.891	0.33	0.19612	0.104817	0.519866	0.185214
12	104318172	A	G	5.534	0.32	0.08557	0.078618	0.857561	0.79723
6	121748542	A	G	2.656	0.53	0.025	0.060301	0.498788	2.90545e-31
2	66756976	A	G	1.363	0.32	0.10659	0.060301	0.644651	0.540369
6	33548394	G	T	7.868	0.45	0.12136	0.134018	0.78508	1.10412
13	96951433	G	T	0.897	0.36	0.13179	0.067067	0.608408	0.00286289
19	33909710	T	G	0.375	0.33	0.05097	0.091966	0.315916	0.547112
16	85927814	C	T	2.296	0.27	0.0808	0.048193	0.616054	0.185214
4	144003159	T	G	3.079	0.26	0.03253	0.063197	0.537883	1.14837e-34
12	551550	G	A	1.426	0.46	0.03078	0.297752	0.558623	1.10412
6	101674290	C	T	2.147	0.45	0.04893	0.091713	0.277584	0.185214
4	106619140	G	T	1.339	0.34	0.06236	0.083675	0.579903	0.148273
5	176842474	T	C	7.53	0.33	0.06584	0.056003	0.817264	0.839144
9	118143933	C	T	8.685	0.37	0.21946	0.060301	0.864089	0.00286289
16	24675589	T	C	3.082	0.35	0.07771	0.060301	0.502702	5.48171e-29
6	34199092	C	T	0.831	0.23	0.08388	0.060301	0.814961	0.185214
10	104939215	T	C	5.201	0.24	0.08235	0.068591	0.699669	0.168198
20	33722863	A	G	6.951	0.39	0.10852	0.125526	0.45917	1.16797
8	130491752	T	G	9.596	0.33	0.13936	0.060301	0.837287	7.47135e-25
9	22068652	G	A	3.131	0.27	0.03664	0.060301	0.641965	0.622774
[truncated: 970 more rows]

## Sheet: test_regulatory_neutral
Chromosome	Position	Reference allele	Observed allele	CADD score	GWAVA score	FATHMM score	FitCons score	DANN score	FunSeq2 score
20	2193983	C	T	1.143	0.35	0.11042	0.063197	0.596007	0.185214
1	72634574	C	T	1.233	0.37	0.04825	0.063197	0.410559	0.147794
4	187187569	G	A	4.707	0.13	0.19715	0.087872	0.648632	0.46554
2	234679549	T	C	4.929	0.36	0.11761	0.060301	0.802302	0.148273
11	65489941	C	T	13.96	0.44	0.10384	0.094292	0.913013	0.185214
7	69061966	C	G	2.617	0.22	0.23463	0.104817	0.509346	0.185214
16	314484	G	C	1.214	0.31	0.16031	0.074216	0.4126	0.148273
16	85956643	C	T	6.47	0.26	0.06445	0.060301	0.863966	0.185214
6	152285122	C	T	2.496	0.19	0.0529	0.063197	0.720103	0.985935
6	32568990	A	G	1.954	0.16	0.05954	0.056003	0.470275	0.185214
7	37886388	G	C	0.485	0.15	0.07595	0.063197	0.601907	0.0625422
1	204519187	C	G	4.292	0.36	0.21108	0.231514	0.617464	0.936259
15	56721163	T	A	15.23	0.49	0.53234	0.070486	0.844642	0.870543
12	123730935	C	A	1.421	0.25	0.04527	0.121787	0.350772	0.106622
17	8131768	T	C	8.383	0.37	0.18146	0.128073	0.723385	0.00286289
4	74319894	C	T	3.827	0.25	0.09615	0.063197	0.279534	0.583414
11	57510823	G	T	1.47	0.38	0.13413	0.12342	0.4034	0.00286289
19	16549239	A	G	1.293	0.37	0.04242	0.121303	0.68259	0.511471
6	32575820	T	C	5.85	0.33	0.27733	0.060301	0.525658	1.42002
5	54943087	C	T	6.306	0.22	0.09751	0.060301	0.601193	0.148273
20	32332762	C	T	6.001	0.36	0.19707	0.060301	0.329348	1.86989
7	17336597	C	A	9.944	0.43	0.11091	0.060301	0.788159	7.85283e-52
11	92715849	G	A	1.816	0.35	0.08644	0.060301	0.558655	0.0625422
18	19266093	T	C	2.259	0.31	0.04649	0.083675	0.36058	0.188077
4	11370592	T	C	5.915	0.34	0.07682	0.059349	0.223527	0.185214
8	29210042	G	A	10.6	0.5	0.16092	0.125351	0.736541	0.573789
4	145577636	T	C	8.424	0.35	0.68382	0.060301	0.323481	0.418015
11	14387406	C	G	2.894	0.47	0.06971	0.067067	0.519727	5.48171e-29
2	239755198	C	A	9.397	0.37	0.19818	0.183864	0.901867	1.0369
6	31241761	A	T	2.389	0.17	0.11848	0.060301	0.68398	0.547112
9	37000782	T	A	6.424	0.25	0.21061	0.056003	0.792665	0.976512
19	8431027	G	A	6.932	0.3	0.18441	0.127595	0.887323	0.492101
7	100213482	A	G	6.439	0.44	0.25217	0.060301	0.817875	1.95129e-24
16	77427350	T	G	2.488	0.33	0.09868	0.060301	0.627295	0.00286289
9	22019156	T	C	0.191	0.26	0.09981	0.060301	0.564025	0.188077
10	102075527	C	G	11.25	0.41	0.33223	0.060301	0.856299	1.30883
2	21935229	C	A	4.251	0.36	0.10089	0.063197	0.468419	2.20427e-17
16	53811371	G	A	0.989	0.3	0.08886	0.060301	0.420461	0.462695
10	65139117	T	C	1.517	0.26	0.09685	0.060301	0.698717	0.372955
2	49201990	A	G	6.631	0.15	0.28554	0.063197	0.756484	1.01136
2	45645286	G	A	1.472	0.18	0.07996	0.060301	0.422171	0.148273
19	41985553	T	C	0.527	0.39	0.06963	0.063197	0.297066	0.185214
2	27746832	A	C	1.12	0.42	0.13196	0.060301	0.577844	2.11439e-86
9	136211226	G	T	1.021	0.26	0.1079	0.082826	0.845779	0.609034
5	131699958	G	A	7.436	0.4	0.08992	0.060301	0.34145	1.42002
3	87326854	C	T	0.252	0.31	0.04511	0.060301	0.658273	4.38426e-136
1	8526970	G	A	5.247	0.38	0.19569	0.091713	0.346898	1.27883
8	59403583	G	A	1.042	0.44	0.0732	0.063197	0.521933	0.00286289
6	31241700	T	C	0.44	0.14	0.0806	0.060301	0.329261	0.547112
15	69863526	G	A	1.831	0.3	0.08013	0.060301	0.451893	0.185214
9	100613700	G	C	3.608	0.27	0.21063	0.104817	0.392532	0.185214
8	120077460	G	A	0.75	0.19	0.04507	0.063197	0.346072	0.00286289
20	52490859	G	T	0.466	0.36	0.08763	0.060301	0.671219	0.98142
12	89404415	C	T	17.03	0.45	0.90335	0.063197	0.677823	0.622787
19	33909250	C	T	2.937	0.21	0.10173	0.091966	0.542307	1.34953
8	23714122	A	G	4.46	0.36	0.0707	0.060301	0.699133	0.622786
5	35003523	T	C	1.399	0.44	0.09156	0.065574	0.31797	0.859772
12	20520295	G	T	0.486	0.4	0.1995	0.060301	0.652564	0.185214
8	128425906	G	A	1.427	0.45	0.09133	0.078618	0.669023	0.185214
1	220088047	C	A	1.878	0.3	0.06928	0.060301	0.315523	0.00286289
11	71166982	A	G	2.444	0.2	0.07298	0.083675	0.158009	0.372955
1	218605609	G	A	0.639	0.13	0.16187	0.060301	0.662935	0.696686
19	7740698	G	A	3.353	0.34	0.07106	0.056003	0.646431	0.00286289
6	31367742	C	G	9.169	0.26	0.24245	0.064036	0.814121	0.945503
9	114294432	A	T	0.739	0.24	0.08897	0.068591	0.807547	0.148273
14	61117882	T	C	6.916	0.46	0.15721	0.104817	0.757142	1.38633
3	64711844	T	C	1.624	0.22	0.12875	0.063197	0.718322	1.87071e-116
3	186213328	A	T	0.917	0.26	0.03898	0.063197	0.755632	1.07425
9	22098775	G	T	8.479	0.28	0.18999	0.060301	0.839409	0.79723
12	112646669	T	A	8.247	0.53	0.20769	0.121303	0.527311	0.62565
10	91002320	C	T	0.79	0.46	0.12319	0.102588	0.178977	0.573789
3	99355872	A	G	4.923	0.44	0.11695	0.182457	0.264764	0.79723
6	20812674	G	C	0.494	0.23	0.11218	0.060301	0.403147	0.333487
11	27564231	T	C	2.246	0.34	0.0919	0.060301	0.694152	3.22021e-94
2	121225558	C	T	4.374	0.31	0.15131	0.091372	0.818422	1.50344e-33
9	119249968	G	A	0.881	0.38	0.12436	0.060301	0.452074	0.148273
10	100167015	A	T	0.019	0.16	0.04952	0.083675	0.331648	0.492101
18	60793655	T	C	2.254	0.45	0.20391	0.078618	0.708636	1.64991
2	234203233	C	A	6.399	0.59	0.17785	0.343423	0.762303	0.647909
2	106435989	C	T	1.705	0.17	0.11013	0.060301	0.493515	0.871637
14	103574714	C	T	4.389	0.22	0.08287	0.091966	0.702357	1.96203
18	10453360	A	T	17	0.55	0.95959	0.056003	0.89304	1.61456
3	10535622	T	C	10.42	0.32	0.16585	0.060301	0.874339	0.547112
6	150348174	G	A	1.528	0.31	0.07291	0.091372	0.458807	0.185214
8	145022877	A	C	5.1	0.29	0.06132	0.115951	0.542515	1.02128
6	24124631	C	G	1.295	0.3	0.03971	0.063197	0.421128	8.53006e-84
20	23582876	C	G	1.469	0.26	0.0999	0.060301	0.509051	0.97866
6	32635293	C	G	2.865	0.29	0.22876	0.060301	0.575404	0.587857
2	74202473	C	T	9.971	0.28	0.0691	0.060301	0.771316	1.27043e-05
1	243556780	C	T	14.46	0.66	0.41372	0.060301	0.783599	0.929673
15	73978801	G	A	6.935	0.28	0.16588	0.091713	0.660378	0.188077
12	124459469	G	A	2.696	0.47	0.06359	0.068936	0.793104	0.0847532
22	32025318	A	G	2.999	0.29	0.10808	0.106797	0.19837	0.499125
6	20660731	T	C	4.683	0.31	0.15332	0.060301	0.686255	0.459666
1	209980155	T	G	3.614	0.37	0.03406	0.112256	0.498013	5.48171e-29
10	81805799	G	A	0.242	0.39	0.02313	0.060301	0.147768	7.34838e-65
4	55522160	G	A	6.094	0.37	0.12664	0.056003	0.667792	5.18289e-46
9	97712380	A	C	2.874	0.41	0.18619	0.091713	0.737412	0.62551
14	65801448	G	A	2.466	0.32	0.27553	0.182457	0.588742	0.185214
13	42897876	C	T	3.107	0.37	0.09237	0.060301	0.608024	3.61598e-46
3	125906136	C	T	1.664	0.22	0.08695	0.063197	0.661566	0.0847532
10	72113904	T	C	1.345	0.19	0.11601	0.060301	0.57866	0.306886
3	189383215	G	T	1.254	0.3	0.16108	0.063197	0.665374	0.531097
12	117003742	G	A	6.111	0.35	0.12635	0.083675	0.962205	1.04319
4	109662734	C	T	3.3	0.32	0.08248	0.063197	0.300675	1.18658e-25
11	16499691	T	G	0.867	0.35	0.10429	0.063197	0.480054	0.499125
5	3601343	C	A	4.694	0.57	0.23886	0.217501	0.594056	0.492101
10	76396734	A	C	2.278	0.46	0.15868	0.060301	0.345809	1.56628
2	111846649	A	G	0.831	0.18	0.05434	0.063197	0.265474	0.00286289
16	82662707	C	T	9.79	0.29	0.15565	0.104817	0.87148	0.269968
4	89814911	G	A	2.967	0.23	0.06179	0.059349	0.836084	0.148273
1	24525102	T	C	3.195	0.2	0.11639	0.060301	0.514229	1.26562e-19
1	155114774	A	G	2.314	0.44	0.03038	0.060301	0.530548	5.73499e-31
3	191856716	A	G	3.838	0.3	0.12209	0.063197	0.701215	7.9e-93
1	89148115	T	C	1.524	0.29	0.10574	0.063197	0.549216	8.10025e-64
1	20140262	G	A	1.347	0.44	0.11623	0.060301	0.258725	0.982149
16	55356697	T	C	5.627	0.53	0.14188	0.091372	0.576877	0.99177
11	2830891	A	C	0.422	0.24	0.07544	0.074216	0.632186	0.626006
9	118143999	C	T	0.518	0.38	0.04272	0.060301	0.543199	0.00286289
2	20904698	C	T	7.748	0.38	0.11809	0.063197	0.816675	0.00286289
5	76516173	G	A	5.739	0.27	0.19123	0.060301	0.568267	0.685329
3	124339527	G	A	8.141	0.49	0.33102	0.077002	0.83431	2.17351
4	140795631	C	T	8.271	0.39	0.12902	0.060301	0.713374	0.402643
17	64780223	G	T	1.799	0.35	0.18462	0.155556	0.704482	1.17444
1	231816909	C	T	1.992	0.52	0.15768	0.060301	0.524161	0.912327
9	22119026	G	T	1.808	0.13	0.22144	0.060301	0.697931	0.185214
6	54754240	A	G	2.4	0.39	0.09266	0.063197	0.286892	0.148273
11	78094150	C	G	6.942	0.4	0.15974	0.060301	0.799554	0.511471
11	47286564	G	A	4.078	0.23	0.18058	0.060301	0.450436	1.6333
3	119218781	A	T	1.426	0.27	0.12005	0.10224	0.345873	0.994633
17	41878126	T	C	1.415	0.42	0.04449	0.060301	0.620469	2.21569e-19
3	101716395	T	C	0.749	0.44	0.12947	0.063197	0.641192	0.185214
11	65489626	A	G	4.771	0.48	0.07708	0.060301	0.701513	2.93405e-58
20	2280601	A	G	0.971	0.23	0.02971	0.060301	0.343819	0.0847532
19	52600857	G	A	9.174	0.31	0.1541	0.059349	0.865287	3.54872e-31
19	52586546	G	A	2.219	0.24	0.05867	0.121303	0.0792234	0.148273
1	74990525	A	G	1.965	0.37	0.07726	0.060301	0.559958	0.960762
14	38077132	C	G	1.572	0.2	0.1632	0.056003	0.619105	0.00286289
4	106065102	C	A	0.936	0.34	0.11079	0.091372	0.618576	3.79959e-158
11	95866279	C	T	3.875	0.42	0.1425	0.060301	0.781759	0.57833
1	95387478	G	A	3.073	0.39	0.09825	0.081037	0.18675	1.07645
15	40338861	G	A	3.206	0.29	0.11548	0.083675	0.147685	0.185214
4	88221191	G	A	14.64	0.38	0.29799	0.063197	0.840609	0.185214
12	56481118	G	A	7.576	0.53	0.33876	0.12342	0.598666	2.47714
11	48098135	A	G	19.26	0.39	0.97657	0.060301	0.864782	2.20231
8	55369317	A	G	9.572	0.32	0.25252	0.127595	0.730587	1.3154
16	299923	A	G	2.23	0.18	0.09777	0.074216	0.20928	0.148273
20	38631389	C	A	6.566	0.23	0.06102	0.063197	0.741032	0.185214
5	137851795	C	T	16.28	0.5	0.34586	0.137589	0.697707	0.886163
12	12657831	C	A	4.121	0.24	0.16051	0.121303	0.643174	0.243943
11	125826953	A	C	0.628	0.27	0.20391	0.175069	0.412476	0.187741
15	100757103	T	G	7.511	0.36	0.14529	0.060301	0.847826	0.148273
6	94486646	C	T	1.082	0.35	0.08441	0.078618	0.310754	2.46511e-68
9	117569455	A	G	0.078	0.57	0.07707	0.060301	0.333179	3.03145e-148
5	44744978	T	G	11.45	0.28	0.20574	0.063197	0.860263	0.622787
12	47759834	G	T	9.544	0.21	0.31734	0.063197	0.902564	2.51935e-30
6	20640691	T	G	5.372	0.28	0.13771	0.060301	0.680371	0.333487
6	31081323	C	T	3.165	0.23	0.11333	0.060301	0.541244	0.185214
17	7525001	A	G	6.429	0.36	0.16333	0.060301	0.735466	0.718206
8	126450075	G	A	9.401	0.66	0.29122	0.320204	0.7574	1.71738
6	111796015	T	C	5.127	0.35	0.19418	0.091372	0.784264	1.61366
22	30422865	T	C	1.676	0.42	0.10699	0.331037	0.592717	0.394092
9	110094805	C	T	2.585	0.29	0.20855	0.068591	0.59728	3.37084e-73
17	49707251	A	G	14.74	0.36	0.43601	0.091713	0.871733	0.622787
7	149289833	C	A	4.562	0.34	0.10074	0.068591	0.606277	1.87606e-32
11	47373770	C	T	5.011	0.37	0.13784	0.091966	0.592399	0.647909
2	238394083	C	T	4.129	0.55	0.15698	0.091372	0.704106	0.333487
1	117104196	C	G	8.557	0.37	0.1942	0.060301	0.822631	0.333487
10	114725264	G	T	0.007	0.49	0.07681	0.106797	0.295127	0.734389
3	135967695	G	T	1.487	0.46	0.16013	0.060301	0.537593	0.973536
5	141487530	A	G	2.361	0.51	0.18336	0.091372	0.49302	0.333487
4	58071107	T	C	6.367	0.43	0.19586	0.060301	0.834378	0.622787
9	10274058	G	T	0.482	0.16	0.0996	0.060301	0.644275	0.330576
6	32193678	G	A	1.749	0.14	0.05301	0.060301	0.819897	8.74628e-55
22	31012673	A	G	4.846	0.24	0.10014	0.121303	0.825267	0.462695
5	58147831	A	G	5.72	0.31	0.18649	0.063197	0.740155	0.350051
6	31240479	T	G	13.56	0.22	0.11357	0.119651	0.816912	3.58237
16	81534408	C	G	0.985	0.24	0.09725	0.099841	0.324421	0.188077
10	22032912	G	C	3.738	0.38	0.2093	0.059349	0.599378	1.04555e-07
21	44487052	C	T	0.333	0.14	0.06524	0.299256	0.630456	0.649715
8	128219447	T	C	6.074	0.41	0.27327	0.065574	0.63316	1.77596
9	72999150	T	C	8.068	0.51	0.40202	0.063197	0.722765	0.622787
6	32603321	C	T	3.506	0.25	0.14927	0.063197	0.659202	0.492101
15	68888744	G	C	4.388	0.2	0.09734	0.060301	0.721455	1.11802
18	76736333	G	A	11.83	0.49	0.22034	0.104817	0.584205	0.808001
8	105602791	C	G	2.123	0.36	0.19454	0.127595	0.279004	0.188077
17	37975856	G	C	16.83	0.49	0.8712	0.060301	0.760784	0.931831
9	12691618	A	G	5.186	0.3	0.10257	0.063197	0.781314	0.243943
16	52471659	A	C	0.432	0.4	0.21685	0.083675	0.386082	4.73777e-19
8	129162433	G	T	1.582	0.49	0.13897	0.120862	0.507817	0.185214
13	96954438	C	G	0.251	0.29	0.08992	0.063197	0.339452	0.00286289
12	123304752	C	T	2.403	0.28	0.09147	0.060301	0.383749	0.00286289
15	101874763	A	G	6.938	0.36	0.06371	0.056003	0.580748	1.75059
8	27454575	C	T	5.846	0.44	0.59881	0.083675	0.656306	1.55462
16	83712544	G	C	6.921	0.25	0.16678	0.060301	0.726141	0.0847537
18	24285372	T	C	5.978	0.46	0.16574	0.056003	0.741562	0.587086
2	65596657	A	G	2.349	0.4	0.08278	0.060301	0.270587	0.679798
2	200716119	C	A	5.928	0.49	0.34617	0.182457	0.706726	0.800093
12	69002859	T	C	3.111	0.3	0.14794	0.060301	0.203309	0.185214
12	56413356	G	C	7.265	0.53	0.07488	0.083675	0.671878	0.936697
17	53796776	G	A	0.688	0.4	0.17144	0.060301	0.441996	0.185214
5	36303817	T	C	0.238	0.35	0.07653	0.060301	0.579625	2.73365e-108
6	32412592	G	A	2.649	0.45	0.20803	0.078618	0.51089	0.647909
1	219346409	C	T	1.637	0.32	0.10293	0.063197	0.735872	0.185214
6	391623	C	A	9.091	0.41	0.12697	0.182457	0.599897	1.10942
17	61760967	C	T	4.764	0.35	0.11061	0.121303	0.612332	0.976418
1	93147133	T	C	5.98	0.39	0.09428	0.060301	0.705444	0.373789
17	76439109	C	T	5.561	0.36	0.0777	0.074216	0.54321	0.800093
2	215653708	A	G	2.89	0.28	0.17625	0.060301	0.684383	0.72991
1	235272428	G	A	2.389	0.23	0.15565	0.12342	0.805011	0.79723
5	56109971	G	T	2.83	0.42	0.25402	0.125351	0.592676	0.185214
8	24150634	T	C	1.711	0.37	0.05909	0.060301	0.678628	1.82247e-44
6	30016708	C	T	9.333	0.23	0.21895	0.083675	0.710486	0
21	16439116	A	G	11.5	0.35	0.21757	0.060301	0.805601	1.61456
6	32636433	A	G	2.219	0.35	0.10914	0.074216	0.572633	1.7821
6	126803923	A	G	11.15	0.46	0.41703	0.063197	0.870831	5.48171e-29
11	2850612	C	T	3.352	0.23	0.10825	0.074216	0.519691	0.626008
21	40555561	T	C	7.315	0.48	0.06695	0.064036	0.498968	1.92647
4	111782276	A	G	6.157	0.49	0.17825	0.063197	0.722634	0.185214
15	53942839	C	T	3.808	0.43	0.11256	0.060301	0.675342	0.0028629
4	163086646	C	T	1.462	0.28	0.30675	0.060301	0.466426	0.185214
2	29247963	C	T	6.772	0.27	0.12852	0.083675	0.77051	0.97683
20	39671787	G	T	4.978	0.43	0.11184	0.099841	0.782399	1.69783
5	131770881	C	A	6.521	0.43	0.20619	0.060301	0.582088	0.800093
1	98502159	G	C	0.067	0.18	0.03464	0.063197	0.323592	1.48361e-65
6	51675252	C	A	3.517	0.31	0.08994	0.063197	0.609653	0.0625422
8	101025810	T	C	3.001	0.4	0.10545	0.060301	0.681123	0.0625422
5	61922824	A	G	7.689	0.58	0.23048	0.112256	0.797009	0.996575
15	71679767	T	C	4.252	0.22	0.19251	0.087872	0.660459	0.188077
6	126660559	A	C	2.439	0.51	0.17196	0.060301	0.682646	0.622768
5	171883508	C	A	4.565	0.38	0.12538	0.134018	0.444518	0.99177
5	141513683	T	C	7.273	0.24	0.23878	0.083675	0.584353	0.771059
1	10556583	A	G	1.397	0.22	0.06612	0.065499	0.306541	0.802175
2	25143649	C	G	4.077	0.36	0.17009	0.172434	0.406386	2.10291
2	122018895	C	T	4.46	0.3	0.11688	0.060301	0.693901	0.0964537
6	31019459	T	A	5.587	0.22	0.07191	0.060301	0.445332	1.2263e-30
6	32603309	A	G	6.496	0.28	0.16603	0.063197	0.85158	0.492101
10	6100471	C	T	0.947	0.4	0.32369	0.060301	0.165831	2.74666
4	9994932	G	T	0.425	0.22	0.06056	0.063197	0.489733	0.306886
1	249154567	T	C	0.433	0.24	0.06161	0.066767	0.591155	3.56518e-56
7	151406173	C	T	2.116	0.3	0.0629	0.067067	0.719888	0.887349
6	485896	C	G	3.3	0.37	0.05011	0.343423	0.400239	0.915124
6	32576114	A	C	1.482	0.39	0.26294	0.060301	0.435845	0.185214
2	31463534	C	A	7.744	0.3	0.10952	0.083675	0.80738	0.306886
12	56396988	A	G	5.082	0.47	0.10305	0.083675	0.575327	0.0625422
18	20726768	T	A	8.753	0.37	0.13161	0.083675	0.816494	0.330576
10	46013547	G	A	5.298	0.27	0.03753	0.060301	0.633701	0.936915
4	73436348	C	G	3.42	0.33	0.17552	0.063197	0.27547	0.185214
3	38681375	G	A	3.155	0.29	0.10014	0.091713	0.468967	0.51579
11	118753918	C	G	0.111	0.46	0.04665	0.063197	0.298232	0.185214
10	21915794	G	C	14.03	0.41	0.68963	0.059349	0.830588	1.32647
2	102736588	C	T	3.358	0.32	0.06169	0.060301	0.816373	0.656972
4	17802760	T	G	0.892	0.43	0.11476	0.283776	0.110781	0.746617
1	176792690	T	A	6.046	0.33	0.06417	0.063197	0.644168	0.187741
7	51462829	A	G	3.101	0.21	0.29783	0.060301	0.30281	0
9	77500936	C	T	2.504	0.36	0.09684	0.063197	0.443384	0.0625422
4	111395523	G	A	1.261	0.33	0.0758	0.060301	0.212804	0.12696
2	23897935	C	T	8.424	0.27	0.33602	0.083675	0.718822	1.10321
19	43922825	A	G	2.48	0.48	0.18185	0.121303	0.702116	1.11672e-17
2	61216522	C	A	2.445	0.29	0.1193	0.060301	0.448351	0.865012
22	37533866	C	T	3.482	0.19	0.10287	0.078125	0.360911	0.849691
6	139797695	C	T	6.854	0.41	0.06904	0.060301	0.679324	0.622783
4	145651663	A	G	3.024	0.4	0.10194	0.060301	0.303465	0.106622
5	175953702	G	A	2.409	0.54	0.24791	0.059349	0.676433	0.333487
13	28021517	G	A	4.182	0.35	0.1156	0.083675	0.663845	0.696686
4	28820336	C	T	0.427	0.29	0.04926	0.063197	0.173034	4.33206e-54
20	33723730	G	A	3.582	0.37	0.17992	0.125526	0.618057	0.647909
6	151252853	A	G	3.695	0.24	0.11286	0.137589	0.621638	0.226462
19	51363448	A	G	3.102	0.42	0.10505	0.060301	0.682781	0.531097
6	160681314	T	C	1.786	0.44	0.08719	0.060301	0.737903	0.00286289
1	72748669	A	C	14.65	0.53	0.85819	0.172434	0.679749	1.31591
15	78909480	G	A	3.183	0.2	0.26726	0.060301	0.53911	0.0847532
2	46352431	G	T	1.571	0.38	0.19904	0.060301	0.489309	1.05999
1	151882826	C	T	7.179	0.27	0.19643	0.090647	0.694745	1.76634
11	85782647	C	G	3.033	0.29	0.09567	0.060301	0.529742	4.02739e-49
2	1792492	G	A	3.86	0.38	0.10036	0.091966	0.825037	2.60865e-28
20	32304539	G	A	4.427	0.36	0.10001	0.060301	0.699954	1.54385
16	20555709	T	A	3.924	0.28	0.06133	0.060301	0.303137	0.0625422
1	2406472	G	A	2.167	0.36	0.11811	0.074216	0.495507	0.333487
5	40678358	A	G	13.35	0.45	0.22702	0.060301	0.824209	2.36457
3	141094647	T	C	2.706	0.27	0.13285	0.157817	0.514067	1.77368
17	73887996	A	G	5.263	0.43	0.19307	0.17184	0.361687	1.89221
2	28614832	G	A	15.29	0.38	0.44293	0.215285	0.912097	2.38389
5	109023426	G	A	7.936	0.39	0.04951	0.060301	0.835539	0.185214
3	185511819	C	T	2.783	0.28	0.06484	0.083675	0.184331	0.12696
1	10284733	T	C	1.198	0.27	0.05203	0.083675	0.453715	0.865012
7	111677177	C	T	8.546	0.45	0.0757	0.063197	0.732106	0.306886
10	64431630	A	G	2.028	0.54	0.12727	0.060301	0.720058	0.148273
4	175837642	C	T	0.634	0.22	0.03465	0.063197	0.494024	0.0625422
6	31848750	A	C	3.259	0.42	0.17733	0.12342	0.55857	0.580203
4	99799831	C	T	7.515	0.36	0.37452	0.121303	0.642966	1.06567
9	100614140	T	C	8.047	0.17	0.17226	0.182457	0.311407	0.185214
1	118502426	G	A	0.219	0.49	0.09151	0.231514	0.370363	0.616961
12	110734373	C	G	3.991	0.42	0.15773	0.082826	0.458584	0.417219
6	135500740	G	T	17.06	0.47	0.68443	0.060301	0.782531	0.808001
6	111422856	T	A	15.8	0.32	0.74274	0.060301	0.960272	0.00286289
6	32572234	G	A	1.24	0.31	0.16934	0.060301	0.59621	1.25993
1	93007244	G	A	3.859	0.33	0.0603	0.060301	0.535571	0.373789
1	110615094	A	G	10.1	0.35	0.12156	0.091372	0.823585	0.188077
1	206946666	C	T	3.194	0.38	0.14277	0.063197	0.61119	1.19794e-137
4	18025368	T	A	6.265	0.27	0.03545	0.091372	0.31933	7.00854e-08
11	47294304	G	C	1.284	0.29	0.14687	0.074216	0.510395	1.04117
7	100489238	T	C	4.539	0.33	0.14093	0.119651	0.522016	0.492101
11	118662340	A	T	5.329	0.46	0.42592	0.064036	0.584954	2.62777
9	6213818	C	T	0.301	0.11	0.04882	0.063197	0.693334	3.01827e-38
19	33598851	C	A	6.503	0.14	0.05605	0.083675	0.845352	0.0964537
1	150666379	A	G	0.689	0.1	0.06142	0.125526	0.431808	0.679798
9	15289189	T	C	3.426	0.28	0.17223	0.060301	0.642172	0.623355
4	44729489	G	A	1.131	0.39	0.08556	0.091372	0.541829	0.185214
1	162166641	C	T	1.598	0.28	0.11562	0.060301	0.554253	0.46554
10	104939283	A	G	2.467	0.2	0.0212	0.068591	0.324406	0.168198
16	50106163	T	C	4.187	0.28	0.23186	0.083675	0.64945	0.956274
6	31103655	A	G	1.196	0.26	0.06087	0.060301	0.527167	0.188077
6	32193564	C	T	0.714	0.09	0.05823	0.060301	0.732956	3.01827e-38
15	58723738	A	G	6.432	0.39	0.22324	0.060301	0.683199	1.07652
15	62332899	T	C	2.922	0.51	0.13853	0.063197	0.481023	0.306886
15	90345065	C	T	0.273	0.27	0.08851	0.072005	0.447041	0.148273
22	37469749	G	A	2.158	0.27	0.13251	0.068936	0.651766	0.12696
6	38362905	C	T	7.712	0.38	0.14065	0.063197	0.728881	0.147794
17	31255616	G	A	10.71	0.25	0.11386	0.215285	0.91186	1.07652
1	201262184	A	G	2.629	0.15	0.09321	0.060301	0.536079	0.187741
15	72161171	T	A	1.964	0.21	0.06728	0.063197	0.205407	0.148273
1	150952917	T	C	12.79	0.31	0.86362	0.060301	0.748057	0.941322
5	150224099	C	T	2.027	0.3	0.07702	0.060301	0.782663	5.20976e-48
5	167370930	C	T	15.4	0.53	0.70406	0.060301	0.512853	0.00286289
5	75427126	T	A	3.992	0.34	0.13068	0.063197	0.748262	0.0625422
1	182023423	G	A	6.678	0.3	0.17327	0.060301	0.681495	0.808001
10	119304555	G	A	11.08	0.32	0.38131	0.182457	0.919222	2.18491
10	62178604	C	A	5.152	0.44	0.08984	0.056003	0.563725	0.345882
1	240596387	C	T	1.131	0.19	0.03326	0.063197	0.741513	0.147794
5	56172646	T	C	3.019	0.17	0.10186	0.060301	0.454617	0.963873
18	43309467	C	T	2.091	0.21	0.18389	0.060301	0.490337	0.333487
6	16237841	G	A	11.96	0.44	0.24527	0.091372	0.796534	1.7269
5	35968499	A	G	5.15	0.21	0.20377	0.063197	0.828951	0.0028629
4	89054079	T	C	1.596	0.29	0.09055	0.060301	0.658004	0.187741
7	37989620	A	G	13.44	0.13	0.12364	0.078618	0.921695	0.511471
6	167540663	A	G	3.609	0.28	0.13516	0.063197	0.267478	0.306886
9	15295939	C	T	7.514	0.33	0.15234	0.060301	0.8785	1.79186
6	31088060	C	T	7.924	0	0.11534	0.060301	0.777338	0.0625422
22	38173059	G	T	1.441	0.28	0.11352	0.068591	0.451871	0.185214
2	68290529	C	A	12.86	0.49	0.47444	0.090647	0.881454	0.269968
6	32376654	G	T	0.697	0.2	0.09092	0.060301	0.663969	1.19079e-96
12	26488122	T	A	13.43	0.24	0.16582	0.060301	0.907033	0.185214
6	143927902	C	T	1.557	0.35	0.08252	0.060301	0.808364	0.402643
12	14652081	A	G	2.084	0.33	0.09527	0.283776	0.389339	3.10321e-41
1	173010208	C	G	5.821	0.41	0.22437	0.060301	0.730287	0.0625422
14	35870786	G	A	14.63	0.34	0.88345	0.320204	0.743314	1.73346
14	106323864	T	A	0.601	0.25	0.2506	0.074216	0.37202	1.14033
11	126246486	A	C	0.777	0.35	0.04313	0.060301	0.729408	0.247757
7	107445619	T	C	4.91	0.32	0.05215	0.063197	0.602738	0.0022945
19	1045816	G	A	0.253	0.1	0.03858	0.060301	0.726782	0.462695
1	63176673	T	G	4.333	0.3	0.08744	0.060301	0.652036	5.28686e-15
2	102948819	C	T	0.549	0.27	0.04279	0.060301	0.342951	0.306886
2	54348850	A	G	1.956	0.34	0.13113	0.060301	0.640969	0.247757
3	37516184	C	T	3.078	0.25	0.07908	0.060301	0.710238	0.313911
6	99280768	C	G	22.8	0.45	0.89719	0.182457	0.778156	1.2707
8	118185308	A	C	3.164	0.52	0.38136	0.063197	0.66444	0.62565
1	173310285	G	A	8.754	0.25	0.2126	0.063197	0.625148	2.51935e-30
1	120264823	C	G	8.406	0.4	0.36292	0.082826	0.627267	2.55175
16	58623970	C	G	3.764	0.32	0.1305	0.128073	0.343355	0.637233
10	54073991	G	A	22.5	0.7	0.93547	0.172434	0.940729	2.16663
6	90996349	C	T	3.544	0.23	0.06542	0.060301	0.289248	0.243943
7	50511553	T	C	6.662	0.29	0.16503	0.060301	0.839134	4.21777e-05
17	10031823	C	A	0.106	0.32	0.06283	0.060301	0.164178	1.53214
2	65215650	A	T	6.82	0.44	0.49466	0.183864	0.74011	1.10412
11	61640521	G	A	0.563	0.21	0.07903	0.060301	0.554969	2.15857e-94
20	17435564	C	T	0.739	0.35	0.06279	0.060301	0.664405	1.13073
17	7571635	A	T	10.5	0.49	0.17615	0.068591	0.852291	0.998768
2	200134004	A	G	0.928	0.44	0.34927	0.060301	0.709129	0.622787
19	5839788	A	G	4.166	0.6	0.16496	0.060301	0.180193	1.05421
16	85956447	C	T	1.272	0.27	0.07433	0.060301	0.443166	0.185214
11	89875353	G	C	0.329	0.16	0.07473	0.063197	0.456968	0.00286289
15	35047618	G	A	2.984	0.22	0.13407	0.125351	0.74844	1.789
6	31367023	C	G	2.812	0.2	0.05861	0.068936	0.2047	0
1	159682242	T	A	5.632	0.47	0.19773	0.063197	0.77299	0.918951
14	60765191	G	A	0.688	0.59	0.16575	0.175069	0.494709	0.450881
7	65336847	G	A	4.681	0.46	0.03151	0.060301	0.543028	2.74856e-25
7	107207410	T	C	3.413	0.29	0.13516	0.060301	0.666493	0.0625422
13	61112354	T	C	9.103	0.26	0.89909	0.063197	0.694729	0.71924
12	6440508	T	A	4.574	0.57	0.10942	0.137589	0.738704	1.16163
2	162849054	T	A	2.636	0.64	0.14747	0.065499	0.454443	0.678816
17	2127749	T	A	11.83	0.24	0.09643	0.060301	0.859055	0.260237
8	19796130	C	T	8.397	0.37	0.20238	0.104817	0.789667	0.345882
10	63751748	G	A	5.97	0.27	0.17172	0.060301	0.79295	0.333487
15	60894787	C	T	5.488	0.32	0.16911	0.063197	0.630026	0.388575
9	80076340	A	T	0.495	0.22	0.13718	0.091713	0.742382	0.690876
16	15130916	C	T	7.172	0.39	0.27852	0.331037	0.637647	1.71618
1	207784091	C	T	1.559	0.29	0.08136	0.060301	0.494377	0.187741
8	128233217	G	A	2.014	0.44	0.5676	0.060301	0.355477	2.77777
14	92434273	C	T	1.557	0.45	0.08508	0.083675	0.23272	0.187741
1	121280485	A	G	5.166	0.21	0.09023	0.112256	0.601144	0.185214
2	201576135	A	G	7.921	0.28	0.55849	0.059349	0.54609	0.808001
1	216714377	T	C	18.97	0.62	0.97896	0.063197	0.845615	1.01136
18	57571283	A	G	4.202	0.34	0.20301	0.231597	0.610489	0.429157
11	2021011	C	A	7.15	0.26	0.14838	0.119651	0.489472	0.185214
18	60055293	A	C	1.083	0.32	0.09338	0.068591	0.745556	0.402643
8	128032277	A	G	0.073	0.24	0.04753	0.063197	0.159396	0.185214
6	31172157	G	T	1.311	0.3	0.23223	0.076284	0.382881	0.800093
1	72302396	G	T	0.81	0.14	0.13542	0.060301	0.383718	0.147794
1	214618231	A	G	6.727	0.29	0.1723	0.059349	0.419099	0.984971
10	64257464	G	A	4.976	0.44	0.20784	0.060301	0.575103	0.759858
4	155535740	T	C	3.215	0.34	0.07809	0.060301	0.684967	0.185214
22	25006722	A	C	0.504	0.26	0.10796	0.060301	0.653002	0.226462
4	10688314	G	A	3.296	0.08	0.10795	0.060301	0.582377	7.57371e-38
6	152069419	G	A	1.306	0.41	0.0907	0.063197	0.470097	0.985935
1	227798017	G	A	5.217	0.36	0.14371	0.060301	0.810447	0.00286289
4	77408171	G	T	0.61	0.37	0.14138	0.060301	0.633796	0.260237
6	6346762	C	T	1.686	0.34	0.03669	0.091245	0.253762	0.185214
5	32792095	C	T	6.234	0.33	0.10418	0.060301	0.771735	1.789
19	11198491	C	T	6.104	0.35	0.08867	0.067067	0.789801	1.94812
8	20852739	G	A	1.211	0.37	0.07851	0.060301	0.40423	8.31919e-113
2	234158242	A	G	1.624	0.37	0.0793	0.060301	0.620017	0.462695
20	10640042	T	C	6.628	0.31	0.18868	0.125526	0.779816	1.06824
20	5934309	C	T	3.114	0.13	0.0708	0.121303	0.822131	0.493601
5	131665638	G	A	0.42	0.16	0.11933	0.063197	0.568328	0.147794
3	66431818	G	C	1.574	0.2	0.21163	0.12342	0.372997	0.147794
4	7852851	C	T	2.564	0.18	0.11292	0.060301	0.657161	0.429157
16	20374599	C	T	1.042	0.34	0.07495	0.063197	0.204969	0.00286289
6	87866881	A	G	7.775	0.42	0.22534	0.112256	0.655286	0.796488
12	356382	C	T	1.085	0.38	0.15136	0.060301	0.23974	0.188077
12	20230635	A	G	18.36	0.32	0.93133	0.063197	0.847011	0.185214
6	25826119	C	T	1.556	0.2	0.06885	0.063197	0.509455	0.208878
6	160907220	A	G	0.034	0.17	0.02243	0.060301	0.257749	1.40886e-45
1	184659318	T	A	0.32	0.39	0.06005	0.060301	0.122438	1.41154e-38
10	92589410	G	A	12.57	0.38	0.46187	0.083675	0.891026	0.106622
12	111707289	G	A	2.714	0.18	0.1353	0.083675	0.631772	0.188077
11	102401633	G	A	10.15	0.8	0.18955	0.060301	0.745984	2.36214
4	90645674	C	T	2.871	0.38	0.04382	0.063197	0.269786	0.929421
5	78276747	C	T	9.586	0.27	0.3221	0.121303	0.844537	1.60449
11	43606064	C	A	10.71	0.39	0.30799	0.091372	0.760932	1.50578
10	12292565	T	A	14.41	0.3	0.90495	0.125526	0.806564	0.810527
8	121610806	G	A	6.72	0.3	0.04846	0.060301	0.720188	0.462695
10	8103141	C	A	18.49	0.35	0.95063	0.182457	0.820852	2.35928
16	51169613	C	T	3.648	0.39	0.09734	0.060301	0.739611	1.37628e-152
15	79105576	G	A	1.004	0.29	0.03099	0.060301	0.443463	0.855202
3	13548254	G	A	2.602	0.21	0.16192	0.074216	0.603638	0.99177
6	106533579	G	C	10.97	0.56	0.49399	0.125351	0.677441	1.75336
2	169756108	G	T	14.61	0.63	0.12432	0.060301	0.700827	0.799067
3	156799356	T	C	3.489	0.54	0.2518	0.091713	0.361915	0.79723
15	53946232	A	G	4.465	0.32	0.11262	0.060301	0.771794	0.00286289
6	116758795	A	G	1.841	0.36	0.21196	0.175069	0.753231	0.580203
11	69244787	A	G	3.68	0.36	0.04948	0.074216	0.433936	0.185214
11	64439799	T	C	1.282	0.55	0.11713	0.060301	0.577474	1.21823
15	97326865	G	A	2.014	0.46	0.08429	0.063197	0.570869	0.0847532
2	173311536	G	A	1.543	0.36	0.11962	0.083675	0.573397	0.765417
6	117211383	A	G	5.648	0.23	0.24728	0.063197	0.661874	0.45881
6	32376360	T	C	1.398	0.31	0.10728	0.060301	0.623079	1.91813e-87
9	4743995	G	A	4.469	0.22	0.06902	0.060301	0.791643	0.243943
2	25036973	C	T	5.953	0.34	0.14162	0.137589	0.657025	0.984282
1	70905674	T	G	6.375	0.24	0.16775	0.125526	0.752576	1.52122e-36
12	125261839	T	C	1.704	0.43	0.13387	0.078125	0.357165	0.372955
7	143110800	G	A	12.29	0.2	0.8676	0.091713	0.74794	1.41999
8	18259034	C	G	2.775	0.2	0.07426	0.060301	0.600037	6.59772e-62
12	111350221	C	T	5.392	0.21	0.10869	0.060301	0.801959	0.984971
17	29234725	C	T	4.019	0.39	0.0624	0.059349	0.700642	0.0625422
3	121793490	G	A	5.224	0.39	0.30692	0.063197	0.375479	1.25993
2	44071625	C	A	6.958	0.25	0.24258	0.060301	0.655883	0.927407
2	31482213	C	G	3.181	0.26	0.14005	0.060301	0.519443	0.492101
17	3392938	A	C	11.3	0.23	0.93881	0.060301	0.744779	0.92898
6	131892426	C	G	4.168	0.26	0.05388	0.060301	0.73951	6.59772e-62
9	22119128	G	A	4.97	0.17	0.0899	0.060301	0.631277	0.185214
4	156877026	G	A	0.167	0.3	0.0327	0.063197	0.141175	1.06276e-52
2	204802685	T	C	0.733	0.22	0.12597	0.060301	0.4418	0.247757
5	53300640	A	G	0.049	0.23	0.06163	0.060301	0.176654	0.547112
11	8605647	G	A	7.944	0.27	0.39955	0.060301	0.571538	1.11321
1	228881945	G	A	4.685	0.62	0.12898	0.083675	0.817196	0.394092
6	27418144	C	A	6.428	0.41	0.1262	0.063197	0.772333	0.185214
3	179170908	A	G	2.016	0.35	0.22237	0.060301	0.566438	0.847655
6	152010254	A	G	1.45	0.13	0.1899	0.060301	0.457995	0.985935
8	19824045	C	A	11.35	0.27	0.57276	0.175069	0.735885	0.968669
15	62020140	A	G	6.34	0.41	0.22719	0.063197	0.743691	7.00854e-08
6	29853438	C	T	0.327	0.12	0.03232	0.056003	0.482186	3.30363e-42
2	33955044	G	A	3.132	0.32	0.11535	0.060301	0.711937	0.185214
3	141135478	G	A	5.631	0.35	0.18014	0.060301	0.632741	0.62565
2	210871262	G	A	1.183	0.44	0.12475	0.068591	0.64011	0.269968
5	150457485	G	C	5.156	0.29	0.09196	0.060301	0.367315	1.93149
2	161351758	A	T	0.478	0.41	0.14695	0.063197	0.333182	2.03204e-148
1	159685212	A	T	0.18	0.29	0.09938	0.063197	0.48409	3.33616e-69
20	5587958	G	T	1.346	0.18	0.10768	0.060301	0.536366	0.0625422
20	45288246	G	C	0.032	0.17	0.02185	0.083675	0.322416	0.462695
11	118551954	A	G	1.159	0.29	0.08581	0.060301	0.620264	0.185214
20	39314224	T	C	2.71	0.4	0.1161	0.104817	0.523366	0.185214
10	123238052	T	C	0.46	0.69	0.22149	0.283776	0.440545	0.912327
8	145005450	T	C	3.995	0.21	0.1082	0.072005	0.325457	1.02128
6	32864890	G	C	0.714	0.26	0.10942	0.136301	0.69078	0.185214
1	207757235	A	G	6.167	0.34	0.23006	0.060301	0.674437	0.810527
10	64431694	T	C	5.312	0.41	0.1383	0.060301	0.861304	0.148273
7	100486035	C	A	7.359	0.18	0.22929	0.292527	0.484637	2.71618
6	32376542	T	C	3.107	0.22	0.1211	0.060301	0.726925	9.57842e-36
10	46026792	T	C	4.413	0.49	0.07291	0.060301	0.780829	0.746617
4	1246815	G	A	0.819	0.62	0.08299	0.083675	0.384106	0.185214
11	95994983	C	A	5.068	0.38	0.16843	0.060301	0.166343	0.578332
7	27286538	C	T	10.54	0.31	0.87457	0.104817	0.484617	1.11489
6	168941387	A	G	1.341	0.27	0.04734	0.126568	0.321639	0.188077
8	73165651	C	T	0.233	0.37	0.04428	0.091372	0.249785	0.982302
7	106303006	T	C	1.133	0.39	0.09147	0.083675	0.511109	4.54956e-189
4	111782942	G	A	0.655	0.4	0.08506	0.063197	0.186847	2.53173e-117
4	187150478	A	G	1.927	0.15	0.12183	0.060301	0.372945	0.330576
5	98103443	T	G	21.5	0.74	0.91302	0.146926	0.856363	0.808001
3	66790662	G	A	0.108	0.37	0.04248	0.063197	0.786117	1.34006e-103
6	50804521	A	G	3.035	0.27	0.16294	0.104817	0.539945	0.296164
18	53201258	T	C	2.931	0.33	0.11327	0.060301	0.645427	1.17754
7	120981415	A	G	1.897	0.32	0.19094	0.060301	0.753729	1.29913e-91
6	33548493	C	T	0.506	0.39	0.04699	0.091966	0.738232	0.185214
15	43836949	G	A	7.48	0.19	0.14408	0.063197	0.503481	0.00286289
16	73030173	C	T	2.847	0.21	0.06203	0.063197	0.419535	0.679798
12	21380630	A	T	1.186	0.39	0.0841	0.063197	0.590818	0.00286289
9	28426408	A	G	2.648	0.17	0.13643	0.063197	0.475394	0.62565
15	51530167	G	A	1.701	0.34	0.16717	0.060301	0.658362	0.269968
19	39738005	C	A	13.33	0.31	0.30273	0.182457	0.830115	1.42002
12	115109075	G	C	12.81	0.42	0.94772	0.068936	0.830356	1.4878
1	31884219	C	T	5.607	0.22	0.13162	0.091372	0.596165	0.0028629
2	234825180	T	G	3.633	0.43	0.17366	0.060301	0.735202	1.40886e-45
17	37759667	A	T	16.12	0.53	0.38823	0.104817	0.906292	0.808001
13	45911095	C	T	21.1	0.57	0.94953	0.320204	0.814344	1.49442
15	58730571	T	C	4.238	0.2	0.13678	0.060301	0.416455	0.0847532
15	70387090	C	T	2.706	0.48	0.14732	0.125351	0.883104	1.25993
17	68172543	C	T	13.94	0.52	0.97315	0.078618	0.8859	0.936697
13	92988497	G	A	2.279	0.21	0.07069	0.063197	0.360161	0.306886
10	63828998	A	G	8.491	0.38	0.25737	0.063197	0.803318	0.956273
5	158894306	C	T	7.526	0.47	0.18493	0.060301	0.597466	0.622787
2	102614037	C	T	1.495	0.24	0.06989	0.063197	0.2598	0.361897
9	6213927	G	A	0.156	0.21	0.04277	0.063197	0.442945	3.01827e-38
3	72497078	T	G	6.587	0.37	0.20234	0.182457	0.736943	0.185214
7	128593948	A	G	9.492	0.27	0.29402	0.059349	0.807973	0.622787
6	109616497	A	T	9.574	0.47	0.73346	0.060301	0.863753	1.61456
15	62362839	A	G	1.883	0.41	0.14553	0.056003	0.445497	0.148273
2	213295643	T	C	1.416	0.42	0.13826	0.063197	0.610839	0.649715
3	87274437	T	G	3.832	0.32	0.05286	0.063197	0.565997	6.63913e-18
7	44230014	C	G	1.595	0.35	0.12646	0.060301	0.530327	0.547112
10	113931433	G	A	0.955	0.52	0.1041	0.121303	0.648104	0.143092
11	18421554	A	T	10.63	0.31	0.84684	0.12342	0.755221	2.19145
15	51515933	T	G	12.88	0.45	0.15237	0.063197	0.922044	0.269968
11	112023579	G	C	2.271	0.38	0.16014	0.060301	0.549549	0.243943
1	38674585	A	G	2.087	0.48	0.1313	0.060301	0.521715	0.185214
8	19824749	T	C	15.87	0.37	0.87769	0.060301	0.863005	0.968669
1	79130155	G	A	2.292	0.42	0.09631	0.060301	0.772818	6.70813e-22
2	227595978	C	T	9.186	0.51	0.3163	0.060301	0.754626	0.622787
11	24741133	A	G	0.947	0.23	0.06255	0.063197	0.424975	0.00286289
16	68332747	G	A	6.803	0.51	0.32639	0.299256	0.543176	0.771059
1	26522723	G	A	0.684	0.19	0.04093	0.060301	0.499557	0.00286289
4	79281904	G	A	4.173	0.37	0.22938	0.134018	0.511472	0.870543
4	88768059	A	G	3.188	0.36	0.12535	0.060301	0.671509	1.96675e-58
3	119227138	T	C	6.253	0.3	0.16122	0.125526	0.708361	0.188077
5	60730870	T	A	3.518	0.26	0.13374	0.060301	0.795732	0.462695
1	115109967	T	C	10.56	0.52	0.78577	0.137589	0.679091	9.48503e-09
7	25991780	C	T	16.75	0.39	0.43683	0.064036	0.949256	2.41179
5	150273890	A	C	1.288	0.47	0.17865	0.059349	0.712182	0.188077
10	64281259	C	T	4.682	0.23	0.07405	0.063197	0.368258	0.148273
22	41328640	A	T	0.638	0.43	0.29048	0.175069	0.410595	0.394092
6	151939351	T	A	3.223	0.4	0.14758	0.060301	0.54759	0.00286289
1	192543180	G	A	1.93	0.34	0.13915	0.063197	0.465326	1.00538e-46
1	114305168	T	A	15.32	0.68	0.98149	0.175069	0.883077	1.20112
6	33540340	C	T	15.18	0.55	0.90784	0.129117	0.934494	1.11489
7	23503059	T	C	5.311	0.35	0.23034	0.100691	0.734027	0.492101
8	17205148	T	C	3.763	0.19	0.1796	0.060301	0.6468	0.0625422
2	31807940	T	C	7.959	0.4	0.16065	0.063197	0.797051	0.429707
12	88890581	C	G	5.705	0.48	0.30701	0.183335	0.529602	1.01688
5	88199223	C	T	3.006	0.19	0.13136	0.060301	0.219483	0.954569
17	3664538	C	T	1.175	0.27	0.1232	0.060301	0.591924	0.372955
2	230522642	A	T	0.133	0.3	0.06126	0.060301	0.244539	0.148273
6	27660508	T	C	3.281	0.29	0.03778	0.060301	0.413461	0.185214
16	76566577	G	C	0.625	0.41	0.23614	0.063197	0.511831	0.353412
6	398184	C	T	4.155	0.24	0.10118	0.063197	0.573284	1.72143
1	9320291	G	A	8.414	0.37	0.47229	0.096973	0.879893	0.800093
14	30398793	T	C	0.555	0.32	0.07701	0.063197	0.702563	0.531704
8	19795889	T	C	5.386	0.34	0.31939	0.091372	0.802716	1.15388
7	94939830	G	A	4.281	0.15	0.14464	0.063197	0.337339	0.12696
8	70976653	G	C	1.091	0.24	0.12486	0.12342	0.386873	0.353412
14	105390782	A	G	5.986	0.34	0.09862	0.074216	0.875441	0.185214
9	117547060	G	A	2.904	0.64	0.14014	0.060301	0.629745	0.110038
1	177898579	G	C	0.456	0.47	0.15306	0.083675	0.490357	0.188077
12	123640870	T	G	7.879	0.35	0.23105	0.083675	0.685986	0.106622
3	27764776	T	C	12.01	0.38	0.1769	0.182457	0.759559	1.25993
6	43856975	G	T	0.635	0.34	0.13705	0.060301	0.406186	3.13547e-45
15	79371187	G	A	1.027	0.28	0.09214	0.074216	0.396665	1.46353
4	106685825	C	A	0.828	0.4	0.05493	0.063197	0.601962	0.148273
6	32408500	T	G	8.585	0.22	0.25907	0.063197	0.735952	2.23782
2	228135426	G	A	8.251	0.41	0.46078	0.076284	0.543887	2.11783
10	114758520	C	T	2.994	0.29	0.12423	0.099841	0.623171	0.549175
11	116652351	A	G	3.696	0.21	0.11838	0.128073	0.413053	0.417219
22	24991370	C	T	3.558	0.1	0.12191	0.091713	0.528235	0.963873
3	67456973	G	C	0.629	0.23	0.09704	0.063197	0.692408	0.296164
6	13271220	G	A	6.878	0.19	0.15157	0.060301	0.626127	0.531097
9	6213824	G	C	0.025	0.12	0.04055	0.063197	0.473094	0.0847532
10	18725730	C	T	17.41	0.43	0.88597	0.060301	0.489851	0.729408
10	35297483	T	A	22.3	0.48	0.98173	0.121303	0.885115	1.27883
6	47454395	A	T	1.955	0.46	0.14302	0.099841	0.74592	0.917488
16	58440385	A	C	1.867	0.39	0.19464	0.060301	0.673834	0.621247
20	33765616	A	G	5.295	0.19	0.09929	0.060301	0.683066	0.647909
8	126450909	C	T	1.096	0.37	0.12739	0.082826	0.764663	1.41154e-38
2	27742174	T	C	0.951	0.43	0.11595	0.060301	0.562292	0.0625422
2	218148883	C	T	4.084	0.26	0.22845	0.060301	0.487205	0.928133
2	53897536	A	G	5.284	0.41	0.18457	0.175069	0.724202	0.148273
3	52853401	C	T	0.528	0.27	0.05436	0.060301	0.624418	0.269968
11	72373990	A	C	6.81	0.27	0.05699	0.067067	0.85061	0.768765
11	117036956	T	A	9.069	0.13	0.09301	0.082826	0.867198	0.450881
16	20443264	A	T	0.056	0.13	0.02891	0.063197	0.044042	0.00286289
4	4648259	C	T	2.185	0.4	0.03916	0.060301	0.592252	0.185214
2	203751981	A	G	3.128	0.28	0.06569	0.137589	0.450668	0.686423
17	46124148	T	C	17.65	0.59	0.88687	0.100691	0.859624	0.808001
5	131755651	C	T	1.188	0.31	0.12471	0.091966	0.406141	0.800093
15	84579186	C	A	3.157	0.3	0.0331	0.060301	0.126886	0.0847532
17	29164700	T	C	3.589	0.37	0.07754	0.128073	0.569636	0.148273
6	32373774	G	A	2.346	0.07	0.12132	0.060301	0.350933	1.13073
9	136925956	C	T	8.189	0.29	0.1256	0.097409	0.764843	0.844215
10	62224180	C	G	4.671	0.41	0.16503	0.063197	0.728226	0.345882
13	102930695	C	A	2.047	0.34	0.15819	0.063197	0.508318	0.372955
2	25185519	C	T	12.48	0.4	0.09209	0.076284	0.838708	0.57833
10	122522511	T	A	1.682	0.36	0.09687	0.060301	0.769835	9.66481e-24
18	44754161	C	T	4.998	0.19	0.16139	0.063197	0.438706	0.00286292
19	2179793	A	G	3.039	0.46	0.06291	0.074216	0.194213	0.462695
16	29984505	A	G	7.715	0.44	0.2748	0.091372	0.747411	1.88271
9	99161954	G	T	7.62	0.32	0.21534	0.066767	0.840171	0.333487
10	22294269	T	C	3.003	0.42	0.11183	0.063197	0.788657	5.26391e-52
17	619162	A	G	12.33	0.35	0.78326	0.119651	0.690883	1.15913
2	48329	A	G	9.887	0.5	0.34938	0.060301	0.826761	2.51935e-30
10	30335243	C	T	3.82	0.15	0.1202	0.060301	0.68203	0.00286289
12	100815850	T	A	8.943	0.28	0.20591	0.063197	0.633367	0.622787
15	61076315	C	T	1.261	0.26	0.0523	0.060301	0.449624	0.388575
19	41310609	A	G	3.92	0.43	0.09491	0.292527	0.652129	0.647909
15	75900855	T	C	0.775	0.25	0.06925	0.128073	0.51319	0.961366
12	115122875	C	A	12.1	0.54	0.43581	0.182457	0.739641	1.4878
3	11641410	G	A	2.873	0.25	0.12607	0.060301	0.178224	0.492101
14	25506439	C	T	2.492	0.24	0.1161	0.060301	0.553601	2.25015
5	2314192	G	T	0.232	0.27	0.13213	0.060301	0.505666	4.53469e-33
5	173362457	T	C	3.396	0.33	0.05598	0.060301	0.689718	0.679798
1	76216519	C	T	2.971	0.16	0.05992	0.083675	0.32725	0.174287
20	21743528	C	T	1.611	0.31	0.12504	0.063197	0.672596	2.47876e-33
11	2194914	A	G	0.412	0.19	0.0857	0.048193	0.418618	0.636096
12	123827106	G	A	5.164	0.28	0.14988	0.121303	0.552097	0.892754
12	102800005	A	G	16.66	0.53	0.85753	0.063197	0.603306	1.44067
4	90646102	G	A	4.776	0.54	0.18736	0.063197	0.546347	1.55067
3	52532308	G	A	5.649	0.36	0.16397	0.074216	0.827038	1.58311
9	136131022	C	T	4.188	0.24	0.13217	0.074216	0.633775	0.185214
10	17223154	G	T	1.34	0.14	0.1025	0.083675	0.351866	0.330576
2	165541199	T	C	6.962	0.32	0.12585	0.063197	0.834911	0.0625422
9	12692252	T	G	1.066	0.23	0.06965	0.063197	0.39654	0.243943
1	31183711	C	A	5.469	0.27	0.1283	0.060301	0.722036	7.73197e-46
15	58723711	C	T	4.37	0.43	0.22756	0.060301	0.706578	1.07652
14	68784502	C	G	1.115	0.43	0.18091	0.060301	0.372691	0.00286289
20	22038156	G	A	2.58	0.32	0.08129	0.063197	0.613884	3.59929e-21
6	41915143	T	C	5.684	0.24	0.04135	0.060301	0.50057	0.587755
7	50750758	G	A	1.366	0.19	0.07922	0.060301	0.524307	0.52149
7	17337763	T	C	0.981	0.29	0.09147	0.060301	0.485568	1.7099
3	52278944	T	C	5.083	0.55	0.25163	0.068936	0.365836	2.24711
7	150668963	T	A	9.1	0.21	0.1632	0.091966	0.840624	1.15848
10	131427372	A	G	0.181	0.19	0.04366	0.076284	0.13203	0.411676
21	17101132	C	G	1.912	0.31	0.13507	0.060301	0.57739	0.185214
17	44079636	G	A	4.571	0.25	0.19626	0.074216	0.730012	0.966401
2	121225516	C	T	4.939	0.21	0.09348	0.091372	0.677038	9.94495e-66
7	16707595	G	C	1.189	0.34	0.65625	0.060301	0.728524	1.37556
2	106438368	G	A	3.36	0.37	0.13341	0.078125	0.508007	0.871637
2	33359565	G	A	20.2	0.5	0.95297	0.574621	0.892139	1.68025
4	47568564	A	G	0.561	0.26	0.09313	0.063197	0.464105	0.280326
3	66445476	C	G	21.6	0.53	0.92636	0.12342	0.71282	0.892754
7	66092246	C	T	15.19	0.31	0.53984	0.060301	0.956931	0.185214
7	97816072	T	C	2.835	0.42	0.15883	0.121303	0.685731	0.492101
11	14914706	T	C	4.092	0.41	0.17798	0.060301	0.543284	0.0028686
10	96036696	G	A	2.911	0.11	0.11241	0.060301	0.537729	0.243943
2	68624344	T	C	3.809	0.27	0.24802	0.063197	0.660006	0.729408
6	31368391	A	T	2.918	0.35	0.18617	0.182457	0.550174	1.9284
3	195800465	T	C	5.007	0.23	0.18803	0.048193	0.608565	1.59372
3	56718804	A	T	2.248	0.44	0.03732	0.091372	0.396745	0.622787
5	8463633	G	A	0.271	0.34	0.07633	0.083675	0.185513	1.37403e-74
7	17337417	C	T	5.644	0.36	0.06613	0.060301	0.508485	0.185214
16	79632498	T	C	14.64	0.48	0.86594	0.209056	0.682166	1.74812
20	42988303	G	A	0.754	0.27	0.07676	0.060301	0.162933	0.985935
13	74513180	C	T	6.058	0.19	0.13004	0.106748	0.759864	0.51579
3	135913296	C	G	16.37	0.56	0.9188	0.090647	0.856671	1.91997
11	27495883	C	T	0.15	0.27	0.09413	0.060301	0.245505	9.84265e-62
9	8314642	A	G	8.773	0.45	0.95095	0.183335	0.705995	0.953363
7	150641557	A	G	0.028	0.4	0.1038	0.060301	0.286386	1.53664
6	31123882	G	A	8.683	0.39	0.26779	0.068591	0.834228	1.2011
9	137285160	C	T	7.642	0.29	0.09003	0.074216	0.766029	1.15534
4	77359789	G	A	3.276	0.25	0.1225	0.083675	0.760188	0.260237
8	76478616	A	G	0.627	0.41	0.14462	0.063197	0.49014	0.973267
9	88970509	C	T	6.274	0.35	0.15524	0.056003	0.442048	0.185214
3	87275661	T	C	3.515	0.38	0.19158	0.100691	0.335839	0.429157
4	149365236	C	G	10.25	0.39	0.18312	0.125351	0.434752	1.98663
13	23471370	G	A	1.632	0.12	0.06878	0.063197	0.247587	0
6	32733242	T	A	6.789	0.13	0.14437	0.063197	0.514665	5.29407e-31
14	38682693	G	A	3.492	0.38	0.12815	0.091372	0.332572	0.99177
2	165349463	T	C	1.582	0.48	0.16267	0.183335	0.622125	0.296164
17	42240198	T	G	0.676	0.34	0.02271	0.125526	0.341121	2.59379e-49
10	80842748	T	C	5.3	0.28	0.13646	0.081037	0.704624	0.573789
6	127605432	C	T	1.851	0.31	0.05639	0.125526	0.44148	0.187741
3	171996519	C	G	5.135	0.24	0.12919	0.059349	0.821302	0.0625422
2	33361217	A	G	7.156	0.33	0.22717	0.060301	0.673219	0.445452
10	18241829	T	C	5.515	0.3	0.17322	0.063197	0.662479	0.00286289
4	80497692	C	T	2.758	0.44	0.37523	0.067067	0.561674	0.99177
1	162209578	A	G	0.805	0.38	0.11508	0.060301	0.430798	0.46554
9	100613783	T	C	2.534	0.26	0.16467	0.104817	0.28757	0.185214
17	26104823	C	T	0.035	0.19	0.03335	0.060301	0.675421	0.0847532
14	37132828	C	T	12.88	0.31	0.17966	0.182457	0.795001	1.40148
8	135637639	C	T	1.428	0.18	0.14719	0.067067	0.47557	0.188077
2	75939935	G	A	2.984	0.14	0.02701	0.121787	0.584522	0
3	150469996	A	G	0.986	0.29	0.14046	0.091713	0.47436	0.647909
17	801065	G	A	0.166	0.17	0.03807	0.112256	0.764895	0.12696
11	2427211	G	A	4.096	0.09	0.19497	0.059349	0.886674	0.462695
6	32733236	T	A	0.278	0.14	0.06831	0.063197	0.19689	3.32709e-37
14	73975760	G	T	0.878	0.47	0.09888	0.067067	0.36137	0.188077
6	31905522	G	A	0.723	0.37	0.04529	0.060301	0.271514	0.746617
5	150450251	T	C	2.748	0.43	0.14148	0.081037	0.715995	1.48588
5	96250585	A	G	2.945	0.2	0.14302	0.063197	0.574324	0.306886
5	172664173	C	T	7.777	0.34	0.19734	0.127595	0.723375	0.975801
1	247600813	G	T	0.456	0.38	0.1128	0.063197	0.453668	0.333487
5	78345936	C	T	4.293	0.2	0.08741	0.060301	0.813427	0.00286289
8	129161752	A	G	2.152	0.34	0.09761	0.060301	0.52635	1.08497e-60
1	21834899	A	T	4.466	0.43	0.18893	0.104817	0.846821	0.185214
6	96023755	A	T	4.211	0.38	0.15812	0.060301	0.65005	0.622785
2	44072551	C	G	10.23	0.26	0.5864	0.060301	0.825662	1.54698
12	64263318	C	T	5.235	0.26	0.11403	0.102588	0.324962	0.492101
20	39314120	G	T	4.552	0.26	0.1546	0.104817	0.767021	0.185214
17	27717200	C	T	6.625	0.55	0.35797	0.064036	0.911962	1.61723
10	9316443	T	A	4.433	0.46	0.08573	0.063197	0.651881	3.6815e-22
19	49209566	A	G	10.04	0.17	0.33297	0.068591	0.821811	5.52063e-24
13	40117748	C	G	2.392	0.3	0.09879	0.060301	0.625548	0.0964537
12	65770709	C	A	5.376	0.3	0.21086	0.060301	0.323751	0.869105
16	83764256	C	T	0.152	0.18	0.0173	0.060301	0.332667	0.0847532
8	55384408	G	A	2.141	0.36	0.07124	0.091372	0.38153	0.185214
6	32573895	A	G	1.09	0.29	0.12513	0.060301	0.693875	1.42971e-12
11	130718711	T	G	7.337	0.36	0.20342	0.063197	0.782392	0.808001
21	27776307	T	G	6.031	0.28	0.17877	0.060301	0.372535	0.663841
7	24321827	C	T	1.229	0.33	0.03133	0.056003	0.356706	3.56518e-56
6	29908252	G	A	0.093	0.17	0.04123	0.060301	0.63824	1.36768e-49
2	230223790	C	G	2.373	0.32	0.2209	0.063197	0.676044	0.148273
12	131499167	A	G	2.149	0.3	0.08384	0.074216	0.467354	1.12709
16	28921866	G	A	5.19	0.38	0.2024	0.083675	0.61113	2.44973
5	147856507	C	T	5.477	0.19	0.17474	0.060301	0.574743	0.739742
6	25870664	G	A	2.273	0.33	0.07399	0.063197	0.52083	0.00286289
14	81451052	C	T	3.814	0.16	0.0402	0.063197	0.490841	0.430929
14	72417484	G	C	5.239	0.18	0.10682	0.063197	0.740575	0.12696
12	104318053	A	G	5.369	0.3	0.22485	0.063197	0.769433	0.79723
6	146918609	C	G	0.89	0.21	0.102	0.063197	0.492483	9.17039e-112
3	186433471	C	T	0.084	0.08	0.02474	0.060301	0.394034	2.27682e-45
6	11219070	G	C	18.28	0.61	0.93913	0.060301	0.695067	2.9883
7	150641873	G	T	3.314	0.34	0.24745	0.074216	0.635072	3.50326
3	51072562	C	T	0.386	0.36	0.0552	0.063197	0.561251	0.243943
14	88489241	A	G	2.597	0.24	0.14856	0.060301	0.556259	0.185214
3	119119278	G	A	0.753	0.13	0.0473	0.083675	0.556979	0.106622
6	32861168	A	G	0.747	0.34	0.08319	0.10224	0.211395	0.185214
8	11349576	C	A	6.479	0.28	0.08122	0.063197	0.651925	0.79723
8	106579649	G	T	0.995	0.41	0.12264	0.060301	0.533763	0.187741
3	11400877	C	T	0.658	0.3	0.0452	0.060301	0.434774	0.388575
6	32020961	G	C	0.5	0.31	0.09647	0.083675	0.645264	0.0625422
19	51364380	C	T	5.512	0.19	0.11131	0.060301	0.592966	2.59166e-10
2	145423945	G	T	11.94	0.52	0.2431	0.060301	0.606712	0.969571
4	54852213	C	T	5.181	0.26	0.21068	0.063197	0.436584	1.45776
4	3473246	A	G	2.908	0.3	0.05559	0.104817	0.356703	0.148273
16	11187587	C	G	5.779	0.31	0.15294	0.060301	0.316752	0.763545
7	20174433	G	A	6.995	0.29	0.05323	0.125526	0.710778	1.30258
6	127438642	C	A	5.859	0.36	0.14261	0.104817	0.507245	1.6363e-41
10	96071548	T	C	5.259	0.4	0.14659	0.063197	0.714633	0.866265
7	73026151	A	T	0.295	0.29	0.07113	0.060301	0.647884	0.168198
10	102303152	A	C	0.755	0.12	0.04817	0.128073	0.434053	0.296164
6	32407404	G	C	7.12	0.47	0.13826	0.125351	0.734821	0.79723
3	140394979	G	A	7.614	0.33	0.08115	0.063197	0.807754	2.26199e-27
19	45405634	G	C	0.147	0.29	0.09378	0.12342	0.414798	0.679798
17	46669456	G	A	20.9	0.46	0.93749	0.104817	0.956442	1.4878
3	39522595	T	C	3.903	0.15	0.04292	0.063197	0.490071	0.0028629
6	32626975	A	C	1.799	0.26	0.17256	0.060301	0.839561	0.185214
6	135377603	A	C	1.87	0.2	0.07186	0.083675	0.706516	0.306886
12	41366042	G	T	1.095	0.34	0.09737	0.060301	0.601511	0.573789
2	55843385	G	C	7.048	0.18	0.14873	0.112256	0.73632	0.981702
7	119912849	A	G	13.85	0.46	0.88413	0.182457	0.391204	1.04117
8	19818274	C	G	1.325	0.17	0.19032	0.060301	0.381495	0.345882
11	26351773	T	C	3.327	0.32	0.19992	0.060301	0.621091	0.00286293
2	203531126	C	T	1.922	0.42	0.08069	0.060301	0.62561	0.800093
12	45774146	G	A	3.034	0.19	0.13383	0.125526	0.570575	1.13826
4	130034210	T	G	5.52	0.31	0.22819	0.060301	0.653649	0.62565
6	12927603	G	A	4.131	0.23	0.10796	0.060301	0.40479	0.531097
2	102985950	T	C	10.07	0.21	0.19175	0.063197	0.874715	0.12696
10	6102259	C	T	0.213	0.28	0.03897	0.060301	0.586855	0.781187
11	128331430	A	G	9.693	0.41	0.25906	0.175069	0.851213	1.60237
10	25217885	G	C	0.109	0.16	0.02369	0.060301	0.520187	0.46554
11	48064218	T	C	1.65	0.46	0.10139	0.083675	0.516599	0.772969
9	137279571	G	A	1.701	0.33	0.10233	0.074216	0.762462	1.95569
2	182319660	T	A	3.483	0.44	0.14709	0.063197	0.741785	1.50324
2	169783209	A	G	4.294	0.31	0.11042	0.063197	0.408838	0.0625422
10	69993070	G	A	7.896	0.46	0.23035	0.091372	0.791524	0.185214
4	155484015	C	T	13.94	0.84	0.54954	0.063197	0.402319	0.587857
6	34213434	C	T	8.759	0.44	0.3845	0.193828	0.831957	1.57171
22	32028700	G	C	1.435	0.34	0.0833	0.083675	0.519784	0.313911
5	102599660	G	A	1.948	0.25	0.14224	0.083675	0.466725	0.00286289
3	30682977	G	A	4.554	0.29	0.15632	0.059349	0.601046	0.796488
10	1155896	G	A	4.173	0.33	0.18545	0.074216	0.597723	0.647909
7	136642816	G	A	5.132	0.37	0.15435	0.060301	0.611632	0.411676
8	55384704	G	A	5.095	0.36	0.09904	0.091372	0.809756	0.185214
8	121562403	G	C	0.738	0.22	0.15561	0.060301	0.623965	0.462695
19	49228231	G	C	9.884	0.45	0.92465	0.106651	0.66369	3.29453
16	89818340	G	C	1.725	0.17	0.08297	0.059349	0.828734	0.763706
6	32780572	T	C	0.135	0.38	0.12143	0.060301	0.452762	0.440792
8	16850338	A	G	1.914	0.3	0.28485	0.060301	0.727728	0.886163
11	47336442	G	C	0.299	0.26	0.08442	0.121303	0.672803	0.243943
22	18439598	A	G	5.232	0.29	0.18302	0.083675	0.637412	1.08804
19	9996438	C	G	2.825	0.28	0.13786	0.114383	0.635779	0.46554
11	65336544	C	A	6.229	0.37	0.04435	0.10224	0.547042	0.79723
1	20207074	T	G	7.026	0.26	0.08913	0.060301	0.780601	0.991317
2	36682570	T	C	3.244	0.4	0.15209	0.060301	0.308949	0.587857
6	32707400	G	A	1.605	0.13	0.07058	0.060301	0.436515	1.29137e-50
9	82341069	A	C	10.8	0.73	0.22074	0.331037	0.835971	0.894192
17	53054749	A	T	1.734	0.24	0.08694	0.060301	0.715589	0.679798
11	62200846	C	T	0.102	0.33	0.0569	0.060301	0.632265	0.185214
1	3083294	C	T	3.26	0.27	0.08886	0.074216	0.766981	1.14901
17	46841993	T	C	9.567	0.34	0.13258	0.091372	0.763124	0.00286289
4	79513384	A	G	6.711	0.47	0.24162	0.060301	0.694879	1.78275
8	118024945	T	C	0.051	0.47	0.05324	0.063197	0.229325	0.00286289
2	102957532	T	C	1.644	0.15	0.16208	0.063197	0.614815	0.492101
10	101380224	C	A	14.13	0.43	0.80285	0.182457	0.900036	2.08927
2	242260931	C	G	6.406	0.33	0.09114	0.114383	0.72618	0.746617
11	2489911	C	T	0.09	0.32	0.01918	0.091372	0.588509	0.440792
4	149081331	C	A	10.06	0.42	0.25893	0.060301	0.833502	1.01136
4	103511905	T	C	3.081	0.39	0.08783	0.063197	0.784948	0.976418
7	100494960	G	T	9.646	0.49	0.17328	0.182457	0.751566	2.09589
8	130496365	G	A	4.264	0.38	0.17713	0.060301	0.732861	0.185214
6	32707168	A	T	1.129	0.22	0.16141	0.060301	0.784216	1.297e-13
12	66360274	T	C	0.47	0.28	0.15357	0.060301	0.363353	1.87071e-116
5	148903070	C	T	4.063	0.44	0.04734	0.081037	0.193765	0.720532
6	31440599	G	T	0.57	0.23	0.06921	0.060301	0.717129	9.84265e-62
1	161200227	T	C	3.873	0.49	0.18358	0.292756	0.472349	0.857972
2	237105050	C	T	4.864	0.14	0.19008	0.060301	0.513567	0.0028629
11	118618085	T	A	3.299	0.37	0.12589	0.068591	0.270071	0.185214
1	94551518	C	T	6.726	0.5	0.16477	0.060301	0.578377	0.685316
17	32305285	G	A	1.685	0.41	0.04984	0.112256	0.7323	0.188077
7	96119174	G	A	5.678	0.37	0.10438	0.063197	0.807645	0.915281
17	47570963	T	C	2.291	0.4	0.1666	0.059349	0.334922	3.53715e-22
15	51049077	C	G	7.843	0.27	0.47945	0.078618	0.568256	0.00286289
7	27784458	T	C	6.613	0.28	0.22584	0.091713	0.829619	2.89757
20	16456088	A	G	4.598	0.51	0.80684	0.060301	0.55642	0.800093
16	56993935	C	T	1.045	0.16	0.05528	0.060301	0.468823	2.60723e-51
4	942833	C	T	0.076	0.14	0.03377	0.074216	0.361378	0.188077
21	42746363	C	T	3.045	0.18	0.11583	0.060301	0.625201	0.763545
1	159286386	C	T	2.339	0.44	0.15659	0.063197	0.713636	2.68938e-63
6	32636282	G	A	2.928	0.46	0.14986	0.074216	0.608776	2.24527
11	83620447	G	A	2.035	0.27	0.14871	0.063197	0.959679	0.622974
1	162192689	A	G	3.218	0.37	0.11789	0.091713	0.687434	0.46554
8	9183339	C	T	3.728	0.24	0.12567	0.063197	0.650792	0.99177
4	73323903	C	T	2.385	0.31	0.10261	0.063197	0.195499	0.00286289
16	57012699	A	G	0.351	0.23	0.05146	0.059349	0.542421	0.168198
6	82879581	A	G	5.712	0.52	0.2154	0.060301	0.654979	0.808001
12	102875257	C	T	22.4	0.45	0.95499	0.060301	0.842198	1.45144
1	4012991	C	T	4.221	0.38	0.09293	0.060301	0.348541	0.185214
13	76325868	A	G	4.88	0.34	0.19186	0.063197	0.768825	0.445592
16	88852409	C	T	1.861	0.43	0.12938	0.182457	0.559765	0.991345
10	96696674	T	C	2.61	0.28	0.10936	0.063197	0.715653	0.982483
10	83633390	C	G	10.12	0.41	0.29907	0.068936	0.671803	0.808001
4	74866106	G	A	5.467	0.45	0.13548	0.060301	0.846105	0.185214
8	81438310	G	A	1.336	0.35	0.04854	0.083675	0.659772	0.00286289
8	103935912	G	T	15.55	0.34	0.96219	0.292756	0.827544	0.188077
1	115239355	G	A	2.218	0.3	0.03233	0.063197	0.306317	1.3335e-16
2	243029225	C	T	4.941	0.37	0.1004	0.091372	0.489894	2.51935e-30
8	19815106	T	C	2.495	0.18	0.0909	0.078618	0.712565	1.33765
12	26689621	A	G	0.702	0.3	0.08833	0.078618	0.33323	0.12696
2	162029566	T	C	9.557	0.33	0.15965	0.066767	0.811917	1.66637
1	11979312	G	A	4.317	0.33	0.13062	0.125526	0.476095	5.28399e-38
1	158575766	G	A	1.667	0.28	0.07224	0.060301	0.677696	1.75818e-92
6	105410037	T	C	4.068	0.25	0.14796	0.060301	0.702034	0.00440281
17	29333829	C	A	3.012	0.47	0.05795	0.060301	0.320777	1.30054
12	88954180	T	C	1.603	0.18	0.07775	0.060301	0.624436	0.208878
19	39741418	C	A	8.53	0.31	0.20126	0.056003	0.810761	1.75769e-30
1	102464570	A	G	0.517	0.37	0.1145	0.063197	0.791917	1.69707e-117
6	485849	C	T	3.004	0.44	0.07218	0.343423	0.658481	0.915124
7	44230381	G	A	5.136	0.44	0.18907	0.060301	0.760997	0.547115
6	33057835	C	T	1.24	0.15	0.06899	0.083675	0.2567	5.42237e-48
11	5472735	T	G	6.108	0.21	0.18815	0.063197	0.599641	0.208878
8	90729368	G	A	1.672	0.32	0.06588	0.083675	0.679067	3.07129e-37
7	130680316	G	A	3.268	0.55	0.14787	0.060301	0.694941	0.185214
15	92935272	A	T	8.323	0.33	0.15901	0.125351	0.848495	0.986453
11	102695385	C	A	2.274	0.47	0.12534	0.060301	0.666505	0.185214
6	11042850	C	T	8.906	0.34	0.32595	0.104817	0.804226	1.7269
1	152551547	A	G	0.166	0.31	0.06486	0.063197	0.381728	4.12052e-112
1	165693084	A	G	0.115	0.35	0.02671	0.060301	0.41986	3.99466e-100
11	5021575	C	T	4.289	0.3	0.23452	0.063197	0.571593	1.07644e-26
11	589595	T	A	2.181	0.24	0.13245	0.137589	0.436218	0.148273
18	57570528	G	A	12.28	0.35	0.8821	0.292527	0.830502	1.05194
15	63422640	G	A	0.813	0.29	0.0484	0.175069	0.443774	0.306886
22	30573552	T	C	18.26	0.35	0.95402	0.060301	0.873019	0.622787
1	112415583	C	T	2.686	0.2	0.06332	0.063197	0.628849	0.12696
3	169580157	A	G	5.928	0.19	0.13785	0.091966	0.705279	0.148273
17	6027839	C	T	10.88	0.48	0.12101	0.060301	0.769877	8.10465e-41
19	50092002	T	G	8.187	0.44	0.42472	0.175069	0.795876	1.0905
5	72470853	T	C	1.681	0.54	0.18104	0.060301	0.420519	0.0625422
1	25293485	G	C	1.115	0.27	0.19445	0.060301	0.686614	0.79723
6	31241116	C	T	1.506	0.25	0.10751	0.104817	0.355434	0.988665
2	25483673	C	T	3.309	0.38	0.1011	0.087872	0.74807	0.647909
16	53816838	G	A	3.538	0.29	0.13158	0.060301	0.522186	0.462695
14	69255644	A	C	1.73	0.44	0.45726	0.457825	0.216311	0.931831
5	87836419	T	G	15.82	0.67	0.98686	0.091713	0.87017	0.810864
16	15138411	A	G	1.016	0.14	0.07167	0.152955	0.360864	0.462695
2	134327733	C	G	2.701	0.35	0.0673	0.091713	0.402298	5.60692e-30
6	41891995	T	A	7.634	0.31	0.05567	0.081037	0.851758	0.891912
6	32305238	C	T	13.07	0.21	0.13044	0.063197	0.836149	0.188077
2	63133584	G	C	1.664	0.38	0.06867	0.063197	0.555732	0.306886
19	33906192	G	A	3.964	0.17	0.07173	0.074216	0.886547	0.361897
4	9927553	A	G	1.576	0.14	0.04228	0.060301	0.266193	1.28091
6	32441577	G	C	1.936	0.38	0.10701	0.091966	0.62177	0.79723
5	40679498	T	C	4.645	0.41	0.18524	0.182457	0.446722	1.73161
1	172055179	C	T	1.532	0.18	0.04583	0.063197	0.31676	0.168198
7	124462155	G	A	0.811	0.27	0.09043	0.060301	0.217614	3.5497e-93
7	134785709	T	C	3.263	0.39	0.18536	0.063197	0.598938	0.333487
4	155482946	C	T	4.716	0.28	0.11117	0.063197	0.587702	2.35649e-32
5	58979926	A	G	6.667	0.42	0.25505	0.060301	0.547313	0.936697
20	1610357	T	C	1.581	0.19	0.06538	0.060301	0.692159	0.247757
1	230305172	A	C	1.254	0.23	0.12448	0.060301	0.412474	0.945503
11	116618464	G	A	5.743	0.36	0.15384	0.121303	0.76064	1.36768e-49
1	101414270	C	T	2.212	0.27	0.06198	0.060301	0.147768	0.0625422
12	124204277	T	G	7.652	0.48	0.13353	0.128073	0.560416	0.247757
2	202162905	G	A	5.557	0.4	0.08611	0.063197	0.596281	0.291836
16	9936040	G	A	0.428	0.43	0.05078	0.083675	0.560424	0.696686
8	143312749	C	T	4.738	0.29	0.12365	0.060301	0.256271	0.0028629
11	128582637	C	T	3.449	0.27	0.07415	0.060301	0.295857	0.462695
3	38887315	T	C	1.463	0.43	0.16009	0.063197	0.511346	0.00286289
4	144105382	T	C	1.115	0.08	0.29415	0.090647	0.339732	1.05431
1	61792008	G	A	8.884	0.42	0.10834	0.060301	0.82139	0.462695
2	56121481	C	T	3.448	0.44	0.21029	0.063197	0.610203	0.260237
14	23979019	C	G	4.021	0.39	0.16603	0.060301	0.790077	0.796488
4	1096236	A	G	3.392	0.29	0.07424	0.083675	0.615563	0.00286289
15	62362769	G	A	0.093	0.49	0.06202	0.056003	0.179007	0.148273
6	32863767	G	A	5.101	0.41	0.06566	0.112256	0.654684	0.185214
4	17878590	A	G	6.504	0.47	0.19139	0.063197	0.680418	0.295208
15	95397622	G	A	2.715	0.41	0.12718	0.074216	0.441632	0.185214
3	133534231	C	T	3.949	0.46	0.16035	0.137589	0.510923	0.799107
12	123824635	C	T	2.978	0.14	0.11072	0.128073	0.0946406	0.0847532
9	136204198	A	T	0.174	0.3	0.08624	0.10224	0.445205	5.32876e-49
6	7106147	C	T	1.587	0.43	0.14038	0.078125	0.600052	0.492101
14	51402696	C	T	5.982	0.14	0.37351	0.060301	0.678415	1.3376
9	22042086	G	A	10.99	0.48	0.12304	0.135981	0.752744	1.78018
6	32636392	T	A	6.989	0.41	0.16112	0.074216	0.53808	1.25993
3	37605310	T	C	3.638	0.33	0.14331	0.060301	0.57019	0.313911
6	10980988	T	C	12.26	0.41	0.15918	0.060301	0.791069	4.7468e-12
6	32626750	A	G	1.907	0.27	0.13265	0.060301	0.698656	0.185214
20	1920783	G	A	0.976	0.35	0.09814	0.083675	0.720227	0.185214
1	159682036	T	C	6.787	0.36	0.20763	0.063197	0.741273	0.622787
6	33216012	T	C	9.305	0.38	0.23545	0.215285	0.767317	0.79723
19	48374213	A	G	2.887	0.23	0.03309	0.060301	0.270974	0.462695
2	201570635	C	T	7.228	0.47	0.25071	0.050388	0.735171	0.797439
1	156029509	C	G	0.336	0.36	0.12545	0.059349	0.356213	4.95535e-106
13	41129924	T	C	17.61	0.53	0.9546	0.283776	0.915036	1.12606
6	111544839	C	T	1.078	0.49	0.11034	0.083675	0.298146	0.00286289
3	186453524	G	A	0.537	0.18	0.04793	0.063197	0.369752	0.549175
13	47238421	T	G	2.489	0.24	0.06625	0.091713	0.451571	0.0847532
12	56865040	G	T	1.536	0.5	0.20416	0.320204	0.362908	0.243943
6	126804568	T	G	9.31	0.36	0.23041	0.063197	0.81499	1.08763e-30
4	103552430	A	G	3.141	0.21	0.11917	0.060301	0.629705	8.51149e-29
8	95937940	A	G	0.007	0.17	0.02349	0.121303	0.137428	0.00286289
11	116663319	T	C	3.988	0.44	0.25531	0.074216	0.55036	2.63521
12	90008194	A	C	3.592	0.42	0.13708	0.060301	0.590639	0.280326
1	76189445	T	C	2.384	0.2	0.12272	0.097409	0.372987	0.185214
11	130272385	T	G	3.37	0.54	0.04498	0.060301	0.631233	0.185214
5	158876700	A	G	5.677	0.36	0.16642	0.060301	0.838866	0.61937
4	145564979	G	C	6.592	0.17	0.18296	0.091372	0.766828	0.185214
1	11838696	A	G	6.658	0.03	0.13796	0.083675	0.712759	0.00286289
6	167177726	T	C	0.25	0.28	0.08521	0.065574	0.207259	1.17434
6	16289615	G	A	3.84	0.32	0.11121	0.060301	0.662757	0.306886
6	41930725	G	A	1.806	0.34	0.06762	0.060301	0.234293	0.587755
5	78336283	A	G	3.117	0.23	0.07906	0.063197	0.623264	0.00286289
3	24352376	C	T	6.174	0.51	0.16894	0.063197	0.713468	0.722865
2	48666338	G	A	0.562	0.36	0.043	0.060301	0.891492	3.35527e-48
15	77921069	G	C	1.193	0.21	0.17218	0.068591	0.350845	1.29866
5	61924008	C	T	4.536	0.52	0.1446	0.327786	0.55465	0.373789
9	108537072	T	C	2.636	0.41	0.18785	0.078618	0.774151	0.00286289
5	127168878	G	A	3.531	0.2	0.11302	0.063197	0.662481	1.32999e-32
11	240754	A	C	3.231	0.15	0.14113	0.121303	0.83608	0.809468
1	67820961	G	T	0.809	0.38	0.07904	0.060301	0.435229	0.77115
3	52835468	T	C	4.605	0.22	0.04351	0.060301	0.302915	0.251173
12	109999068	G	A	6.201	0.37	0.19217	0.083675	0.915239	0.462695
1	107597303	T	A	8.514	0.43	0.24849	0.060301	0.642622	0.622787
6	43906364	C	T	1.424	0.51	0.10735	0.060301	0.841252	0.185214
5	88098120	A	G	6.098	0.27	0.07451	0.063197	0.753654	0.954569
1	68634825	C	T	1.052	0.31	0.09301	0.060301	0.206907	0.00286289
10	6106192	C	T	5.305	0.42	0.09954	0.060301	0.828246	0.781187
10	73591794	G	A	4.078	0.42	0.06204	0.137589	0.482567	1.04319
4	145566477	T	C	8.636	0.23	0.09658	0.183864	0.303168	0.291836
4	189069010	G	A	7.222	0.26	0.36965	0.060301	0.490408	0.808001
10	81059649	C	T	5.556	0.26	0.20553	0.072005	0.423165	1.00257
12	66344706	A	G	3.436	0.44	0.11777	0.060301	0.505985	0.243943
16	11347869	G	A	16.43	0.32	0.93965	0.097409	0.743956	1.42288
4	44730393	A	G	1.739	0.11	0.06347	0.063197	0.48011	2.51935e-30
9	22114495	A	C	2.168	0.19	0.18225	0.060301	0.70869	0.249932
20	3193732	G	A	3.305	0.21	0.14254	0.231597	0.668398	0.0847532
20	34046335	T	C	6.499	0.39	0.19536	0.121303	0.708893	1.2707
4	9992998	T	C	4.594	0.44	0.1213	0.063197	0.650649	0.492101
5	102614387	A	G	4.344	0.38	0.24938	0.060301	0.530358	0.622787
12	121437802	A	G	5.873	0.37	0.14932	0.059349	0.759766	0.865012
6	9698578	A	G	4.11	0.45	0.20129	0.063197	0.358926	0.810864
2	198300526	G	T	2.057	0.48	0.23897	0.090647	0.59973	1.12752
10	5149993	C	A	1.329	0.25	0.0706	0.060301	0.306242	1.84041e-71
11	10325730	G	A	10.67	0.36	0.28627	0.064036	0.699404	1.99835
8	24150017	T	C	1.974	0.39	0.13624	0.060301	0.68092	0.185214
6	34217015	C	T	8.015	0.46	0.15093	0.182457	0.798513	0.800097
14	97033919	C	T	2.92	0.45	0.19621	0.059349	0.420586	1.77489
5	110406108	G	C	6.221	0.54	0.18249	0.182457	0.55536	1.60932
13	33159155	C	T	1.913	0.41	0.0756	0.060301	0.274493	1.99586e-25
1	159252002	G	A	3.437	0.37	0.44007	0.063197	0.245731	0.185214
10	79680399	G	A	4.49	0.23	0.1206	0.099841	0.46217	0.499125
8	27459317	A	G	1.25	0.3	0.14652	0.121303	0.847788	0.746617
8	81153998	T	C	0.166	0.37	0.03639	0.074216	0.287755	2.51662e-76
13	100038825	T	C	9.397	0.24	0.17599	0.074216	0.772057	0.611585
9	22034051	G	A	4.373	0.3	0.16832	0.060301	0.744189	8.46345e-33
7	148658676	G	A	1.294	0.29	0.06959	0.060301	0.379865	5.36659e-44
2	166545257	G	A	13.5	0.47	0.97678	0.083675	0.789691	0.62565
22	39833437	T	C	12.35	0.46	0.38645	0.182457	0.881774	0.79723
10	44465791	G	C	1.182	0.23	0.11794	0.063197	0.584861	0.185214
5	168257170	T	C	7.563	0.28	0.35859	0.091372	0.843138	1.13579
14	98601232	G	C	16.31	0.67	0.97267	0.063197	0.731284	1.59831
5	134499380	G	T	10.93	0.32	0.29032	0.063197	0.822596	0.62565
12	66353276	C	T	1.059	0.47	0.14904	0.083675	0.566074	0.243943
10	101771094	T	C	0.816	0.28	0.12336	0.060301	0.491364	8.69406e-14
1	100109949	T	G	10.65	0.46	0.17349	0.060301	0.839181	0.185214
19	1119779	C	T	6.439	0.19	0.19612	0.099915	0.791953	0.931831
13	94010179	A	G	4.312	0.24	0.12337	0.060301	0.547588	1.10412
3	64705541	T	C	6.683	0.39	0.21164	0.060301	0.814868	0.622787
14	68760185	C	T	6.481	0.28	0.0953	0.060301	0.726397	1.05976
5	33958910	A	C	5.739	0.36	0.05861	0.091713	0.674495	0.685329
18	57570403	G	C	1.115	0.34	0.18901	0.292527	0.569026	1.04117
1	145442254	G	C	2.024	0.43	0.15538	0.320204	0.484715	1.6333
17	59484578	G	T	11.17	0.46	0.64217	0.104817	0.640994	1.38633
15	68043147	A	T	4.375	0.2	0.35541	0.087872	0.70421	1.08548
9	110253501	C	T	9.98	0.42	0.13278	0.182457	0.895217	1.0021
4	7218349	C	G	1.715	0.21	0.02572	0.060301	0.402283	0.960762
19	11202460	T	A	9.351	0.49	0.29583	0.100949	0.756271	3.19625
6	32521083	T	C	2.879	0.34	0.13629	0.060301	0.6145	0.977458
13	110929605	T	C	1.775	0.31	0.16419	0.060301	0.54197	0.756114
6	38106657	A	G	2.247	0.23	0.08249	0.096973	0.428321	0.647909
3	86986820	C	T	19.99	0.47	0.93259	0.063197	0.850892	1.61269
14	98600560	T	A	5.265	0.4	0.14055	0.063197	0.460521	8.35547e-76
4	73435784	A	G	6.082	0.54	0.24187	0.182457	0.720959	1.789
16	28548943	G	C	1.568	0.58	0.16593	0.175069	0.496476	0.148273
7	158847091	T	A	3.801	0.25	0.07152	0.060301	0.791758	0.0847532
2	106455021	A	G	10.76	0.26	0.0856	0.112256	0.885707	0.686423
11	45250816	C	A	11.7	0.36	0.31498	0.083675	0.647047	1.17982e-46
2	152957380	G	A	2.215	0.47	0.06829	0.091372	0.798313	0.185214
1	199995063	C	T	5.821	0.12	0.10085	0.060301	0.460941	1.75769e-30
7	2018805	C	T	2.157	0.3	0.05828	0.074216	0.540136	1.85147
13	43134935	C	T	2.422	0.14	0.06418	0.063197	0.392989	2.91297e-32
8	19824604	A	T	8.589	0.23	0.94313	0.083675	0.811921	0.345882
1	204585914	G	A	21.4	0.46	0.97624	0.102588	0.729069	0.808001
2	60614420	C	A	11.07	0.24	0.20089	0.060301	0.807866	0.808001
8	4560293	C	T	0.317	0.29	0.07857	0.063197	0.703128	0.0625422
6	160962633	G	A	6.053	0.2	0.09102	0.063197	0.768186	0.296164
3	168970994	C	T	5.348	0.31	0.215	0.063197	0.431027	1.2707
7	17919493	C	T	12.86	0.37	0.11703	0.060301	0.81464	0.208878
10	3108213	G	T	0.965	0.35	0.08565	0.217501	0.194676	0.716918
11	8639325	G	A	15.33	0.44	0.97336	0.183335	0.876725	0.810864
10	5405315	G	A	1.625	0.37	0.07799	0.063197	0.723085	0.148273
1	157670757	C	T	3.885	0.87	0.15155	0.060301	0.717183	1.05144
3	38598459	C	T	9.233	0.25	0.13401	0.063197	0.766819	0.330576
4	9923835	C	T	1.214	0.22	0.05854	0.060301	0.711487	0.492101
2	20887369	C	A	7.965	0.39	0.08791	0.083675	0.814631	0.00286289
7	28190121	C	T	1.341	0.31	0.13579	0.091713	0.696819	0.344766
9	139120105	A	G	4.23	0.35	0.08044	0.099915	0.64874	0.333487
6	31019562	G	A	9.798	0.12	0.30492	0.060301	0.886949	0.185214
12	102317374	T	C	3.217	0.49	0.18441	0.060301	0.423742	0.333487
3	189356221	G	A	0.019	0.24	0.04027	0.063197	0.381899	0.531097
6	29602539	C	T	13.68	0.38	0.45862	0.112256	0.747623	1.42002
1	21785981	G	T	0.895	0.25	0.05539	0.060301	0.178118	0.204865
2	121102479	C	G	22.1	0.41	0.79263	0.182457	0.824335	1.10347
11	89200873	C	T	1.628	0.33	0.03675	0.091245	0.218617	0.0625422
14	85858447	G	A	1.682	0.2	0.05975	0.063197	0.581134	0.185214
21	40547310	G	A	14.99	0.56	0.9164	0.067067	0.956152	0.956274
10	95895127	G	A	2.19	0.23	0.19901	0.060301	0.25198	0.429157
9	37003075	A	G	6.333	0.38	0.22922	0.182457	0.557098	1.16163
20	52775159	G	A	2.047	0.13	0.08274	0.063197	0.216811	0.306886
4	31148602	A	T	0.21	0.34	0.17921	0.063197	0.624765	8.58359e-40
20	3188021	T	C	7.671	0.39	0.15459	0.068591	0.760524	0.881983
2	204730805	C	G	3.874	0.18	0.19027	0.063197	0.591888	0.000464617
8	129160655	T	A	5.064	0.46	0.06956	0.060301	0.704943	0.587086
10	5405265	G	A	6.475	0.35	0.16427	0.063197	0.561372	0.956274
6	32407440	T	C	2.507	0.41	0.15424	0.182457	0.593578	2.2517
6	25844831	C	T	3.395	0.31	0.11656	0.060301	0.338132	0.188077
12	66358967	A	T	3.634	0.7	0.97628	0.175069	0.627678	0.762113
2	25298048	T	C	2.033	0.36	0.10307	0.060301	0.712264	0.800093
11	104036988	G	T	0.405	0.47	0.12117	0.063197	0.358083	5.24105e-89
2	62727363	A	C	0.906	0.28	0.2066	0.060301	0.617115	0.002863
12	20724891	A	G	4.038	0.37	0.11487	0.063197	0.782575	0.280326
19	8642982	T	C	4.691	0.49	0.18026	0.074216	0.53001	0.148273
14	99719468	A	G	4.656	0.21	0.19347	0.115951	0.682627	0.429157
11	67419990	C	T	11.26	0.35	0.81301	0.060301	0.438917	1.11241
1	172345336	T	G	6.489	0.39	0.19392	0.063197	0.52295	0.765417
6	35034193	T	A	10.85	0.15	0.14925	0.081037	0.854659	0.893288
22	39269928	T	C	0.097	0.4	0.19404	0.091713	0.27933	0.983137
6	106532756	C	G	6.256	0.43	0.34542	0.050388	0.560988	0.79723
17	44019838	G	A	3.879	0.46	0.06798	0.091966	0.880062	2.56132
6	38444081	C	T	7.347	0.62	0.31829	0.091713	0.54788	1.38633
6	7564123	G	A	5.191	0.27	0.10347	0.128073	0.804522	0.622974
17	39958344	T	C	1.161	0.43	0.32316	0.333777	0.356287	0.800093
3	188072518	T	C	3.908	0.33	0.15821	0.060301	0.654312	0.208878
17	40505508	G	A	4.191	0.35	0.1151	0.060301	0.577474	0.989128
5	173383608	T	A	5.968	0.41	0.25958	0.060301	0.432723	0.679798
6	160910463	C	T	1.654	0.34	0.03102	0.060301	0.102799	5.08648e-31
17	61560763	T	C	6.209	0.31	0.10257	0.074216	0.724003	0.956245
17	33322783	C	T	7.179	0.43	0.19061	0.12342	0.692738	0.373789
10	49699939	C	T	6.856	0.11	0.09641	0.060301	0.809242	0.306886
17	40514388	T	C	7.999	0.41	0.08304	0.102588	0.817677	1.78636
12	103695378	A	C	1.142	0.41	0.21986	0.112256	0.748203	0.00286289
1	207929327	A	G	7.663	0.38	0.06156	0.059349	0.832909	2.1509
10	114752410	C	T	1.582	0.28	0.08275	0.068591	0.72469	0.734389
8	4403364	C	T	3.493	0.33	0.10062	0.063197	0.487033	0.0625422
18	67536617	T	C	9.542	0.27	0.3127	0.063197	0.842774	0.12696
11	128331288	C	T	10.62	0.55	0.16487	0.292756	0.878601	0.97958
15	62363300	G	A	7.678	0.29	0.12434	0.056003	0.737329	6.46619e-31
11	66833327	G	A	3.819	0.2	0.13561	0.074216	0.45976	0.547112
1	21834056	G	A	2.312	0.32	0.09244	0.074216	0.661099	5.48171e-29
6	32707644	G	C	0.204	0.19	0.07867	0.060301	0.619659	0.185214
17	48273903	A	C	8.312	0.29	0.22567	0.12342	0.810734	0.631082
11	76248622	A	G	3.547	0.48	0.14182	0.121303	0.379111	0.00286289
22	50966773	C	A	6.918	0.18	0.19497	0.068936	0.83584	1.25993
11	17377871	A	C	0.626	0.1	0.07411	0.063197	0.615179	0.00286289
4	87956990	A	G	4.819	0.34	0.12577	0.081037	0.671164	0.865012
6	160834828	T	C	0.889	0.19	0.05402	0.063197	0.463881	0.0847532
2	43541412	A	G	3.766	0.33	0.10334	0.063197	0.765406	0.796488
16	68591386	T	C	3.449	0.11	0.14009	0.121303	0.663227	0.204865
12	11855663	T	C	3.892	0.28	0.13257	0.060301	0.468381	0.547112
3	128296506	C	T	5.064	0.25	0.10307	0.091713	0.633173	0.185214
12	112869780	A	G	5.54	0.4	0.14783	0.059349	0.605498	1.56508
11	30608453	T	C	3.607	0.4	0.19041	0.182457	0.575861	0.531097
1	34189443	G	A	4.677	0.23	0.15425	0.128073	0.647871	0.147794
4	106618948	T	C	7.87	0.57	0.09259	0.060301	0.847026	0.148273
2	33955231	G	C	11.31	0.38	0.89752	0.091713	0.755164	1.61344
6	20666055	G	A	0.453	0.2	0.07944	0.063197	0.789633	0.148273
1	120454086	A	G	8.813	0.45	0.16142	0.060301	0.87111	2.74856e-25
11	126283681	C	T	8.119	0.22	0.28794	0.060301	0.585358	0.685329
17	47436812	A	T	0.799	0.48	0.17621	0.081037	0.598783	0.306886
6	45244478	C	A	2.786	0.36	0.09683	0.060301	0.657642	0.903521
2	180566242	A	G	3.152	0.33	0.15474	0.063197	0.659306	0.148273
13	73688889	G	A	0.53	0.39	0.0998	0.060301	0.246393	3.90649e-14
6	152010343	T	C	5.771	0.19	0.19543	0.060301	0.666276	0.985935
6	16129072	A	G	20.1	0.53	0.98475	0.182457	0.771244	2.09981
1	221917338	A	G	3.857	0.3	0.13822	0.112256	0.405703	1.25993
6	135540222	G	A	13.86	0.42	0.90784	0.292756	0.842067	0.860731
18	56382893	C	T	3.237	0.21	0.11155	0.060301	0.643506	0.361897
2	164593148	C	G	10.6	0.4	0.35697	0.064036	0.741502	0.204641
16	73050706	G	T	6.224	0.47	0.37176	0.060301	0.615572	1.4878
2	229888365	T	C	9.526	0.44	0.23334	0.063197	0.759525	0.70754
1	205736663	C	A	7.075	0.32	0.14094	0.060301	0.564486	0.804584
18	53154167	C	T	2.296	0.41	0.12376	0.060301	0.63826	0.992331
16	80637311	G	T	1.569	0.4	0.22058	0.078618	0.383494	0.00286289
10	112255894	C	T	10.85	0.4	0.47545	0.183864	0.84975	1.37556
4	73435488	C	G	3.736	0.46	0.32466	0.182457	0.625532	0.800093
20	36840458	G	C	0.724	0.35	0.03716	0.060301	0.471104	0.939108
6	32376019	G	T	0.833	0.17	0.13821	0.078125	0.666154	2.1199
2	217726767	A	G	1.127	0.35	0.11898	0.060301	0.686903	2.70553e-104
9	22121357	T	C	1.816	0.3	0.11104	0.063197	0.712895	1.08763e-30
4	100072567	C	T	5.626	0.24	0.10713	0.063197	0.512615	0.188077
2	111989349	A	C	0.673	0.3	0.11222	0.077002	0.431035	0.185214
10	8304767	C	A	0.8	0.23	0.04397	0.063197	0.212359	6.63552e-41
15	75077100	G	A	6.09	0.37	0.15397	0.083675	0.641266	2.64927
6	32603242	G	A	0.851	0.25	0.12262	0.063197	0.476627	0.492101
9	22097022	C	T	3.693	0.3	0.1579	0.060301	0.668093	0.289831
13	23864744	C	T	0.544	0.2	0.04285	0.060301	0.651586	0.243943
3	18481990	A	C	19.27	0.57	0.90949	0.056003	0.831225	1.23893
6	34821394	A	G	1.029	0.28	0.03537	0.060301	0.403416	0.148273
3	133503750	C	T	9.373	0.3	0.22742	0.060301	0.909989	0.549175
5	56912226	A	G	1.252	0.25	0.0859	0.063197	0.69561	3.1406e-123
19	19469629	T	C	4.045	0.39	0.03247	0.059349	0.493088	0.185214
5	6324166	T	C	1.401	0.34	0.10052	0.060301	0.387114	1.4383e-53
12	94234882	C	G	4.209	0.3	0.12284	0.121303	0.578887	0.345891
6	29689254	G	C	0.155	0.24	0.06771	0.091372	0.398685	1.19598e-59
11	72927934	T	A	6.716	0.58	0.18409	0.091372	0.649482	0.306915
7	150652360	C	T	0.731	0.24	0.10265	0.108573	0.674578	2.52561
8	19815847	T	C	0.853	0.24	0.0956	0.060301	0.591189	0.345882
5	1344682	C	T	6.829	0.24	0.1526	0.119651	0.676681	0.333487
17	27917201	G	T	9.075	0.39	0.21491	0.182457	0.793031	2.62235
22	24997005	T	C	1.314	0.27	0.06157	0.060301	0.772784	0.963873
19	1064411	A	G	3.516	0.23	0.15935	0.068936	0.467857	1.62843
1	55503171	C	T	1.073	0.4	0.07604	0.056003	0.37913	4.92577e-65
16	240390	C	T	3.391	0.2	0.10956	0.17184	0.395748	0.599268
11	34903504	G	A	6.627	0.43	0.14388	0.060301	0.738122	0.313911
5	109035798	T	G	3.567	0.35	0.11012	0.083675	0.560462	0.148273
20	52791390	C	G	7.996	0.24	0.09973	0.182457	0.408014	1.77939
1	158977712	G	A	3.683	0.52	0.04605	0.104817	0.351749	2.42994
13	111958484	C	T	1.605	0.21	0.0552	0.128073	0.519662	3.92996e-55
11	5223921	G	A	0.254	0.22	0.06952	0.060301	0.534003	0.00286289
17	74946573	G	A	1.306	0.27	0.08036	0.072005	0.755952	0.185214
10	70931353	T	C	13.98	0.52	0.98	0.292756	0.88608	1.30258
2	106439888	G	A	3.455	0.24	0.2368	0.060301	0.776219	1.48365
6	32724061	A	G	5.011	0.36	0.03381	0.060301	0.552057	0.247757
1	156192057	C	G	2.914	0.29	0.09166	0.125526	0.674408	0.960762
2	211543147	T	G	3.985	0.4	0.16857	0.078618	0.777555	0.333487
4	22821404	C	T	2.179	0.3	0.05794	0.063197	0.400345	7.16672e-94
1	119955624	T	C	1.337	0.23	0.04342	0.063197	0.55891	5.31862e-56
3	114367033	T	C	11.96	0.2	0.61182	0.060301	0.92788	0.813052
7	144076915	C	G	3.441	0.11	0.06471	0.128073	0.625769	0.12696
19	33527677	T	A	3.508	0.27	0.25095	0.060301	0.294535	0.330576
2	219908001	G	A	1.879	0.26	0.08447	0.056003	0.581872	4.03507e-42
15	45721040	G	T	0.429	0.31	0.06864	0.074216	0.823552	0.800093
19	45398785	C	T	2.538	0.14	0.11014	0.12342	0.403941	0.865012
6	34206645	C	G	7.999	0.43	0.17993	0.166053	0.623119	2.53783
17	68173088	G	A	15.32	0.5	0.93246	0.063197	0.906269	0.936697
11	102716268	G	A	5.291	0.37	0.19299	0.060301	0.622037	0.621754
1	221917378	T	A	4.398	0.26	0.08585	0.112256	0.31927	0.79723
9	136152070	G	C	1.126	0.32	0.07858	0.104817	0.42579	3.54872e-31
1	4713221	C	A	7.137	0.34	0.16987	0.127595	0.484971	0.291836
2	85790316	T	A	5.625	0.25	0.02725	0.060301	0.204221	0.440792
6	160839213	A	G	3.012	0.15	0.06358	0.063197	0.519237	0.0847532
12	66360068	C	T	9.543	0.46	0.86585	0.060301	0.724447	0.86673
15	35047895	T	A	3.671	0.25	0.18795	0.125351	0.704473	0.185214
15	58723709	C	T	5.72	0.43	0.21419	0.060301	0.733595	1.07652
2	135630865	C	T	1.874	0.38	0.14465	0.063197	0.62828	0.247757
11	2691484	G	T	1.276	0.28	0.09248	0.060301	0.811872	0.440792
11	59938832	G	A	0.514	0.26	0.07084	0.060301	0.407336	1.22098e-67
12	24390304	T	C	1.436	0.21	0.10669	0.060301	0.581874	2.73365e-108
1	67597295	C	A	1.823	0.43	0.11881	0.060301	0.409731	0.00286289
13	110405966	C	A	2.633	0.29	0.08261	0.059349	0.296337	2.00785e-66
8	118186197	A	G	1.129	0.44	0.1067	0.063197	0.447706	0.00286289
7	95600231	A	G	1.888	0.33	0.09727	0.063197	0.60568	0.52149
9	4844507	G	T	2.779	0.32	0.30483	0.128073	0.553806	1.09454
5	131659885	A	G	6.392	0.19	0.08979	0.063197	0.79877	0.147794
8	128426434	G	A	2.123	0.53	0.08621	0.063197	0.723534	0.00286289
5	74648496	G	T	0.755	0.35	0.06111	0.12342	0.3182	0.563564
2	103054803	T	C	2.646	0.25	0.08121	0.063197	0.460705	0.0847532
7	50134637	G	T	1.438	0.27	0.1262	0.063197	0.507461	0.148273
16	68821126	C	T	6.86	0.21	0.25852	0.068591	0.738644	1.65798
1	171080239	A	G	5.551	0.36	0.21162	0.078618	0.722762	0.188119
1	169660002	G	T	0.359	0.49	0.1836	0.104817	0.380233	0.345882
18	60793521	C	T	4.648	0.57	0.20791	0.063197	0.728234	1.06282
13	113536712	C	T	3.445	0.44	0.10149	0.283776	0.691196	0.188077
3	138844201	C	T	1.363	0.29	0.10177	0.063197	0.541823	0.147794
5	153568905	T	C	8.36	0.4	0.12609	0.182457	0.706008	1.45837
3	67417045	G	C	12.78	0.39	0.94435	0.060301	0.773645	0.918951
1	248042672	C	G	2.979	0.3	0.13264	0.063197	0.521145	0.188077
6	33593687	C	G	1.969	0.3	0.10044	0.060301	0.698674	0.609034
15	91172224	G	A	1.669	0.2	0.06148	0.083675	0.52923	0.0625422
15	50848996	A	G	1.064	0.24	0.09406	0.060301	0.715358	0.492101
17	38169714	G	A	2.513	0.22	0.08544	0.066767	0.517077	0.185214
5	55437875	G	A	3.458	0.41	0.16986	0.060301	0.763648	0.0625422
2	231116986	A	G	1.353	0.38	0.0667	0.063197	0.575005	0.148273
4	106158999	G	T	0.729	0.45	0.16695	0.060301	0.322508	0.148273
10	50098566	C	T	1.376	0.22	0.062	0.078125	0.312878	0.148273
10	104849011	G	A	10.58	0.5	0.27322	0.331037	0.663604	1.08548
19	49137357	C	T	3.603	0.45	0.09618	0.10224	0.389523	1.47703
6	127456866	G	T	0.867	0.31	0.07154	0.063197	0.509019	0.00286289
1	152551801	C	A	0.116	0.38	0.05552	0.063197	0.314797	0.185214
20	22566820	C	T	8.136	0.37	0.22007	0.127595	0.880838	0.79723
10	76295135	C	T	3.528	0.4	0.06476	0.083675	0.461348	0.57833
10	8105874	G	T	3.795	0.26	0.22396	0.125351	0.556243	1.74726
9	136143528	T	G	1.78	0.15	0.22989	0.060301	0.357724	0
19	19469548	T	C	15.51	0.42	0.73304	0.068591	0.875437	0.188077
2	88891181	T	C	4.868	0.33	0.2397	0.060301	0.633164	1.60449
11	43728534	A	T	11.35	0.25	0.16527	0.081037	0.849806	0.894192
1	203155998	G	A	0.041	0.77	0.16999	0.091966	0.644865	2.11155
20	16451467	A	G	4.379	0.2	0.09016	0.060301	0.785639	0.00286289
6	29941857	G	T	0.602	0.31	0.10348	0.091372	0.761187	0.185214
11	24517179	A	G	1.092	0.52	0.1675	0.063197	0.396957	2.79684e-24
15	25923487	T	C	2.665	0.39	0.05645	0.091713	0.379182	0.00286289
20	44542794	C	A	10.15	0.38	0.25657	0.060301	0.792615	3.01827e-38
6	135357037	A	C	13.33	0.6	0.49671	0.121303	0.782671	0.929673
6	29914089	G	A	5.397	0.35	0.18072	0.059349	0.58325	0.975909
1	55513061	T	C	2.452	0.21	0.07683	0.083675	0.616146	0.647909
14	68700097	T	C	9.537	0.43	0.63415	0.060301	0.750753	0.810864
11	78050112	G	A	2.559	0.27	0.08716	0.063197	0.595225	0.696686
7	142372587	C	T	2.066	0.3	0.06404	0.063197	0.485795	1.14005e-25
6	25548617	T	C	1.881	0.28	0.12915	0.083675	0.654052	0.188077
6	32628621	T	C	0.657	0.25	0.1934	0.060301	0.370232	0.587857
21	44593161	G	A	1.522	0.24	0.21925	0.182457	0.873384	1.23571
5	93550490	A	C	2.892	0.43	0.21211	0.060301	0.587649	0.62565
6	51673573	C	T	2.231	0.27	0.08703	0.063197	0.680228	0.0625422
7	28199444	C	G	3.037	0.45	0.17371	0.060301	0.495148	0.344766
8	128032602	G	A	1.522	0.24	0.05454	0.063197	0.572809	0.185214
3	153220902	T	C	4.112	0.29	0.09972	0.060301	0.682942	2.13287e-12
6	41352649	C	T	2.447	0.33	0.09654	0.056003	0.649745	2.41465e-60
12	90500160	G	A	1.7	0.28	0.08575	0.060301	0.239675	5.48171e-29
6	160670964	A	C	3.506	0.41	0.20502	0.060301	0.658177	0.803311
8	76450292	A	C	9.477	0.37	0.12194	0.063197	0.721583	1.15848
11	64330490	C	T	4.338	0.3	0.12354	0.060301	0.618749	0.269968
10	59066317	G	A	0.172	0.35	0.03335	0.063197	0.567911	1.1715e-51
17	11408280	G	C	0.593	0.38	0.10203	0.060301	0.569435	0.00286289
6	117873740	A	G	1.468	0.31	0.09395	0.060301	0.627641	0.649715
11	45874662	A	G	9.275	0.45	0.2129	0.134018	0.808793	1.10412
6	31142261	G	A	2.881	0.13	0.13158	0.091713	0.683974	0.857972
11	16900835	T	C	2.766	0.26	0.14296	0.060301	0.777669	0.333487
8	27465677	A	G	3.453	0.14	0.12037	0.096973	0.520871	0.931831
8	6323397	T	C	0.533	0.24	0.10126	0.060301	0.29612	0.993469
22	40877514	G	A	0.768	0.32	0.04472	0.060301	0.455647	0.306886
17	33332427	G	A	9.38	0.31	0.84812	0.320204	0.557179	0.185214
4	106815088	T	C	7.632	0.42	0.20323	0.091372	0.783597	1.12961
11	85675910	T	C	8.622	0.39	0.56814	0.060301	0.805565	0.462695
6	136367621	C	G	0.504	0.34	0.12854	0.063197	0.487776	0.147794
2	198895868	G	A	1.467	0.29	0.06844	0.063197	0.246646	0.306886
2	81688416	C	T	0.955	0.34	0.0833	0.067067	0.270388	3.87264e-88
5	40791437	G	A	0.341	0.42	0.13935	0.060301	0.645999	0.891904
6	31326790	C	G	6.925	0.2	0.18556	0.091372	0.663294	0.185214
10	96441949	G	A	0.399	0.42	0.06824	0.060301	0.267045	1.38831e-78
5	96286734	G	A	3.61	0.23	0.12974	0.059349	0.640566	0.306886
17	7536999	A	C	0.465	0.37	0.07643	0.060301	0.422453	8.55561e-31
1	177897975	C	T	13.34	0.56	0.98077	0.091713	0.465971	0.62565
5	88195752	A	G	3.76	0.3	0.16151	0.060301	0.669362	0.954569
2	678414	G	C	1.75	0.49	0.13207	0.112256	0.608463	1.47703
1	208086100	C	G	6.72	0.49	0.06283	0.091372	0.382449	0.622787
20	12932481	G	A	11.15	0.36	0.3593	0.063197	0.910862	0.185214
13	102964672	G	A	3.781	0.35	0.14892	0.063197	0.563421	0.187741
7	142457132	A	C	0.383	0.37	0.0698	0.063197	0.588883	0.602434
19	51877668	A	G	4.358	0.33	0.15254	0.060301	0.733977	0.185214
1	118729326	A	T	0.22	0.23	0.06682	0.060301	0.494408	2.5671e-45
1	154813596	T	G	4.941	0.25	0.07609	0.048193	0.626108	0.333487
14	101139536	C	T	10.58	0.44	0.20471	0.182457	0.87837	0.185214
15	49736189	G	A	10.78	0.33	0.33455	0.063197	0.801204	0.402643
6	31241600	G	A	6.567	0.18	0.11183	0.060301	0.732366	1.53001
22	24172071	G	A	0.827	0.28	0.10758	0.17184	0.743608	1.16479
8	20001995	G	A	3.312	0.22	0.10646	0.060301	0.37963	9.59932e-91
15	97326628	C	T	3.747	0.43	0.10787	0.091245	0.564012	1.07207
6	32786382	A	G	0.416	0.26	0.0424	0.060301	0.386683	0.57833
14	75744580	C	A	9.173	0.42	0.67398	0.064036	0.690488	2.7769
2	192010784	T	C	2.273	0.19	0.1226	0.063197	0.353131	0.636096
12	90101395	G	A	7.472	0.36	0.15731	0.182457	0.800095	1.07756
22	29111891	T	C	3.406	0.36	0.07993	0.125526	0.650221	0.970125
14	101306120	G	T	1.651	0.14	0.16066	0.087872	0.557148	0.411676
6	32044316	C	T	0.12	0.53	0.04296	0.060301	0.708258	1.1367
16	225299	C	T	5.809	0.31	0.27764	0.104817	0.627087	0.945024
2	43722818	C	T	4.819	0.36	0.21257	0.063197	0.80154	0.981702
6	31582572	T	C	1.875	0.49	0.13171	0.060301	0.73612	0.79723
11	118752542	G	A	5.097	0.43	0.26934	0.063197	0.809709	5.48171e-29
12	66226241	A	G	1.34	0.53	0.13623	0.128073	0.525432	0.429157
15	48411821	C	T	7.703	0.62	0.11738	0.060301	0.366673	0.810864
18	20713058	G	A	2.652	0.31	0.06819	0.083675	0.371439	8.55561e-31
17	41831063	T	A	8.014	0.54	0.17257	0.060301	0.714648	3.06499
6	32627405	C	G	0.051	0.34	0.08449	0.083675	0.314385	0.587857
5	76031698	A	G	4.478	0.57	0.23463	0.068591	0.747606	0.185214
5	35046673	C	G	3.529	0.19	0.19267	0.060301	0.647301	0.0625422
3	169150878	G	A	16	0.58	0.76608	0.063197	0.478637	0.64791
15	68086749	C	T	8.116	0.45	0.19871	0.060301	0.733429	1.08319
6	43753722	G	A	21.1	0.62	0.95393	0.231597	0.952244	1.24576
7	116191812	G	C	0.612	0.13	0.14877	0.078125	0.49862	1.06852
5	15784868	G	C	1.144	0.31	0.08058	0.083675	0.714078	0.0847532
14	88472428	A	G	2.16	0.21	0.19272	0.063197	0.437042	0.188077
2	43638855	C	T	2.783	0.45	0.13879	0.060301	0.318556	0.796488
22	21963521	A	G	5.031	0.4	0.05867	0.059349	0.404497	1.72743
1	17673972	A	G	3.829	0.24	0.08515	0.078125	0.199408	1.38035
4	25931662	A	C	1.892	0.45	0.22533	0.060301	0.502879	0.622787
9	4815154	C	G	3.579	0.33	0.0979	0.060301	0.553422	0.656972
11	65599538	G	A	13.44	0.28	0.17778	0.121075	0.884672	0.838773
3	17123322	C	G	3.778	0.41	0.13793	0.083675	0.69073	1.06452
6	161009461	G	A	5.332	0.36	0.08118	0.063197	0.613777	0.296164
8	90803724	G	A	4.1	0.28	0.13054	0.060301	0.468101	3.1312e-29
4	5369092	G	A	1.333	0.32	0.08743	0.060301	0.507839	0.653929
5	150728750	A	G	1.539	0.47	0.13236	0.091713	0.536415	0.987112
5	137706422	T	C	4.583	0.47	0.09968	0.060301	0.757125	1.29866
10	78695402	G	A	2.102	0.23	0.16419	0.066767	0.197822	0.313911
1	197326404	A	G	2.331	0.39	0.20116	0.067067	0.665074	0.499125
5	137587806	A	G	9.758	0.44	0.19465	0.060301	0.687843	1.85954e-75
8	36641772	G	A	0.659	0.61	0.11418	0.063197	0.378193	0.00286289
22	45962251	G	A	6.087	0.36	0.1249	0.091966	0.846884	1.47421
17	59284477	T	G	4.6	0.36	0.14063	0.060301	0.47148	0.87761
2	159899954	A	G	1.042	0.31	0.09767	0.060301	0.299518	0.462695
5	52410868	T	C	3.194	0.42	0.16984	0.067067	0.630391	0.185214
6	29970338	A	G	0.441	0.35	0.10415	0.056003	0.31799	0.185214
18	6941449	T	C	4.699	0.39	0.17936	0.060301	0.813999	1.23367e-71
10	105725551	C	T	8.565	0.32	0.14446	0.072005	0.757454	0.185214
1	172188732	G	C	1.176	0.38	0.15775	0.063197	0.506902	0.168198
16	50715424	T	A	6.764	0.63	0.21583	0.060301	0.611224	1.86579
12	56364544	C	T	20.9	0.61	0.94892	0.231597	0.848204	1.79075
4	106482780	G	A	4.785	0.21	0.11384	0.056003	0.772667	0.0028629
9	98279905	C	T	14.81	0.42	0.88354	0.182457	0.587305	0.808001
5	78316188	T	G	9.072	0.23	0.13191	0.060301	0.847258	0.00286289
1	112392309	G	C	0.902	0.15	0.17474	0.060301	0.471186	0.312174
20	33171645	A	G	7.078	0.25	0.13155	0.083675	0.849691	1.68626
1	35910160	C	T	8.936	0.67	0.32987	0.12342	0.607196	1.69416
14	62600159	T	A	10.5	0.45	0.19828	0.063197	0.8447	0.99177
16	79634635	A	G	21.6	0.55	0.9398	0.182457	0.849321	1.39576
16	50714979	T	C	0.633	0.17	0.11839	0.060301	0.399492	0.269968
15	32926543	T	C	5.308	0.39	0.10137	0.121303	0.806863	0.0625422
10	80923078	G	A	6.471	0.35	0.15095	0.074216	0.441747	1.80856
16	85956397	T	C	1.553	0.17	0.11262	0.060301	0.20046	7.58814e-31
12	33576288	G	A	1.162	0.28	0.11282	0.081037	0.360154	0.0625422
11	24517030	A	C	0.522	0.35	0.17643	0.063197	0.612525	2.23751e-46
5	122503971	A	C	0.024	0.29	0.11181	0.060301	0.235627	0.306886
7	23483704	T	C	4.834	0.43	0.19352	0.083675	0.778136	1.2808
1	2405997	C	T	5.078	0.43	0.1326	0.074216	0.80212	0.333487
15	58725239	T	C	3.05	0.11	0.1165	0.060301	0.720167	0.0847532
10	67965041	T	A	2.266	0.23	0.02669	0.063197	0.461587	0.243943
2	234827995	C	T	2.967	0.36	0.12781	0.063197	0.638516	0.00286289
8	76477995	T	G	3.147	0.31	0.18499	0.063197	0.517259	0.973267
12	115107611	G	A	8.471	0.38	0.26221	0.104817	0.915687	0.79723
12	2420244	G	A	3.864	0.32	0.1131	0.060301	0.755517	0.765417
14	54414738	G	A	11.59	0.48	0.91345	0.104817	0.637701	1.6025
14	50042976	T	G	0.042	0.42	0.03661	0.083675	0.236627	0.185214
9	22031440	G	A	10.94	0.37	0.94383	0.060301	0.546623	0.147023
1	67598205	A	C	1.524	0.22	0.08988	0.060301	0.58142	0.00286289
9	113801608	C	G	14.74	0.41	0.81165	0.125351	0.786898	0.810864
4	9937798	G	A	16.6	0.25	0.84462	0.060301	0.908428	0.492101
1	199996172	G	A	5.412	0.67	0.25245	0.060301	0.306532	0.622787
8	57285320	T	G	1.124	0.31	0.12209	0.063197	0.462749	1.31263e-95
10	73773602	C	T	5.928	0.24	0.15716	0.074216	0.701817	0.185214
2	151345676	C	T	2.156	0.41	0.0665	0.063197	0.58124	0.462695
10	104591152	T	A	6.332	0.23	0.14901	0.066767	0.728238	0.269968
5	56192415	T	C	1.508	0.3	0.07374	0.074216	0.613145	1.38228e-115
16	85930957	G	C	1.159	0.35	0.10118	0.091372	0.265082	5.48171e-29
22	42393351	C	G	8.536	0.68	0.43899	0.295636	0.658098	0.12696
6	12905351	C	A	8.094	0.27	0.18107	0.063197	0.775453	0.350966
8	27193923	G	T	0.99	0.23	0.10013	0.060301	0.593634	1.15534
7	44223479	G	A	0.838	0.26	0.07674	0.060301	0.539955	0.547112
6	118639183	C	A	7.656	0.33	0.19455	0.063197	0.723401	0.185214
12	49687378	G	A	5.227	0.56	0.12894	0.182457	0.77825	0.333008
11	111165100	A	G	1.524	0.3	0.13396	0.060301	0.793238	0.00286289
17	79235986	G	T	0.613	0.22	0.0374	0.074216	0.715791	1.294
18	12785458	T	C	13.95	0.52	0.72048	0.060301	0.707543	1.54626e-81
15	69863542	A	G	2.966	0.27	0.08046	0.060301	0.684655	0.185214
3	41987225	C	T	3.235	0.24	0.07896	0.060301	0.3995	0.57833
16	50836315	A	G	2.931	0.45	0.13074	0.060301	0.255813	5.48171e-29
6	167532740	T	G	3.547	0.23	0.11975	0.060301	0.417606	1.10412
6	32635965	G	T	0.689	0.27	0.17032	0.060301	0.63355	1.19987
6	31542482	C	T	3.162	0.82	0.30789	0.074216	0.462524	0.185214
11	118477226	A	C	7.086	0.55	0.1533	0.127595	0.763708	1.23038
14	55614362	A	G	9.003	0.34	0.10986	0.128073	0.7966	3.67751e-68
16	82658823	C	T	0.209	0.43	0.11257	0.104817	0.720527	0.185214
6	121771207	G	T	0.726	0.21	0.08307	0.12342	0.416781	3.75843e-30
12	57489692	C	T	1.796	0.46	0.20761	0.193828	0.537776	0.966401
14	75939818	G	A	1.66	0.32	0.08007	0.059349	0.160565	0.147794
16	20441215	A	G	4.641	0.09	0.12843	0.063197	0.66571	0.00286289
17	68175960	T	C	5.557	0.49	0.54659	0.078618	0.719261	0.936697
4	58071594	G	C	4.073	0.47	0.19044	0.060301	0.712801	1.05642e-11
6	32863040	G	A	8.75	0.28	0.12932	0.15397	0.715253	0.79723
2	235355603	C	T	4.662	0.41	0.16242	0.066767	0.432384	1.06118
2	5835047	T	C	13.91	0.66	0.98271	0.366681	0.898117	0.685329
19	2170550	C	A	6.177	0.26	0.11439	0.115951	0.676293	0.647909
9	123640520	C	G	7.704	0.35	0.17402	0.125351	0.494666	2.7025
8	86267714	C	T	4.056	0.39	0.08564	0.063197	0.640417	0.306886
10	95348099	G	A	3.184	0.45	0.05234	0.060301	0.478663	0.62565
3	72424471	A	G	13.64	0.63	0.97958	0.327786	0.880068	0.904455
1	218610551	A	G	4.231	0.34	0.1885	0.060301	0.435054	0.696686
15	45652889	A	C	9.621	0.24	0.03833	0.060301	0.729082	1.66595e-17
6	32977044	G	A	5.879	0.28	0.15362	0.090647	0.766371	2.18411
11	2317496	C	G	2.69	0.4	0.11832	0.060301	0.639215	0.333487
14	70498503	A	G	2.86	0.52	0.1516	0.175069	0.527668	0.188077
18	46389888	C	G	13.15	0.37	0.14498	0.074216	0.815279	0.986689
2	219151767	C	T	7.74	0.37	0.71116	0.091966	0.627083	1.54385
1	156700707	C	T	3.476	0.35	0.13162	0.121787	0.606806	0.00286289
11	47656301	C	G	6.198	0.42	0.18191	0.128073	0.537261	0.148273
17	2172264	C	T	1.652	0.33	0.22029	0.060301	0.79439	0.260237
5	109220991	C	T	10.16	0.42	0.7762	0.074216	0.910213	0.185214
6	31440641	G	T	0.709	0.22	0.0664	0.083675	0.645866	3.92996e-55
5	122860577	G	A	1.7	0.35	0.1331	0.060301	0.141021	1.89822
5	158788597	T	G	1.226	0.39	0.06512	0.083675	0.71112	1.58546e-52
12	121439584	C	T	3.477	0.24	0.19712	0.121787	0.437117	0.865054
15	53049094	A	T	17.01	0.66	0.93641	0.060301	0.826978	0.622787
20	57613476	T	C	16	0.47	0.35371	0.060301	0.679027	0.955241
15	59487924	C	T	0.816	0.48	0.08407	0.121303	0.698828	0.673236
1	19284099	C	A	16.3	0.34	0.36867	0.125351	0.820913	0.808001
5	150274079	A	G	5.908	0.43	0.19274	0.283776	0.805926	0.865012
16	72108291	C	T	2.585	0.27	0.11782	0.066767	0.619205	0.148273
6	32603291	A	T	0.15	0.26	0.16656	0.063197	0.729171	0.492101
9	116991429	A	G	7.329	0.2	0.14549	0.091966	0.77444	0.800093
6	12906926	G	A	0.839	0.27	0.06554	0.063197	0.703065	0.345882
15	38763815	C	T	4.415	0.38	0.11875	0.060301	0.637413	1.09839
2	66771771	A	T	0.447	0.38	0.33593	0.063197	0.542166	0.547922
1	162318698	G	A	3.214	0.26	0.07238	0.063197	0.353536	0.46554
3	41239493	A	G	6.854	0.3	0.16523	0.10224	0.721298	1.17754
2	42273734	G	A	3.134	0.35	0.1094	0.128841	0.469128	0.185214
10	60572694	T	A	14.3	0.44	0.38171	0.063197	0.883657	0.903113
8	52858800	A	G	2.706	0.25	0.06129	0.060301	0.33107	2.51935e-30
1	220087462	A	G	4.495	0.43	0.27138	0.060301	0.432342	0.62565
19	17904259	C	G	2.553	0.34	0.08606	0.060301	0.527987	0.188077
3	159704641	T	A	1.765	0.35	0.04557	0.060301	0.384116	2.74557e-71
3	53122257	T	C	0.96	0.39	0.06922	0.083675	0.249903	0.00286289
12	23898671	T	G	0.458	0.32	0.04114	0.060301	0.442382	0.391096
3	185637041	A	C	1.733	0.36	0.06526	0.082826	0.469196	0.306886
6	6347907	T	C	1.773	0.24	0.06788	0.063197	0.736819	2.93006e-42
6	32412809	T	A	4.12	0.4	0.18657	0.063197	0.521967	0.647909
9	107692080	T	C	0.803	0.31	0.0644	0.060301	0.601246	1.27254e-83
11	68194226	G	C	4.003	0.14	0.09433	0.074216	0.825952	0.402643
11	78091037	T	C	0.201	0.22	0.05882	0.060301	0.617124	0.511471
16	75251299	T	C	0.021	0.43	0.02306	0.060301	0.136926	0.333008
11	1036243	C	G	1.937	0.31	0.06081	0.074216	0.335339	0.188077
8	126083417	A	G	10.04	0.42	0.15018	0.128073	0.839499	0.462695
19	17752615	C	T	1.054	0.35	0.07376	0.125526	0.546824	0.394092
6	22139729	G	A	3.042	0.21	0.14039	0.060301	0.637957	5.92375e-59
10	121535448	C	T	2.107	0.4	0.0635	0.063197	0.483271	0.00286289
12	113605769	C	T	0.657	0.31	0.07275	0.121303	0.326331	1.67819
1	152062750	A	G	2.093	0.35	0.15849	0.063197	0.659106	0.185214
13	50301658	T	C	2.622	0.25	0.10085	0.121303	0.749562	0.695358
6	135740033	T	C	0.312	0.42	0.06442	0.060301	0.573182	0.306886
5	96242435	C	T	2.758	0.19	0.07743	0.063197	0.807725	0.306886
2	232988585	T	A	7.41	0.21	0.17624	0.060301	0.733663	0.771059
6	106556493	A	G	0.231	0.66	0.15924	0.083675	0.469861	0.945356
12	104445143	T	C	2.055	0.31	0.08052	0.060301	0.689451	0.00286289
8	11350721	C	G	2.111	0.25	0.11421	0.063197	0.473925	0.79723
5	1317699	G	A	1.877	0.27	0.0976	0.068591	0.393867	0.79723
17	61975688	C	T	0.616	0.2	0.05413	0.060301	0.400008	3.10321e-41
9	22119195	T	C	2.23	0.66	0.12134	0.060301	0.754278	0.185214
1	205242869	G	A	6.427	0.5	0.64764	0.134018	0.455904	1.2131
3	135915822	C	A	10.1	0.49	0.16522	0.064036	0.394271	0.945503
12	103354349	A	C	0.055	0.38	0.28707	0.104817	0.609926	0.98709
16	19897740	T	C	6.191	0.48	0.0934	0.050388	0.611871	0.945503
11	17004484	A	G	5.505	0.29	0.09871	0.087872	0.784266	0.945503
6	206860	C	T	3.56	0.28	0.03938	0.063197	0.373099	2.13172e-35
11	7963067	G	A	2.711	0.3	0.13093	0.063197	0.665416	0.185214
11	116657667	C	T	6.876	0.28	0.21864	0.112256	0.66694	0.602434
11	76262660	A	T	7.571	0.48	0.28955	0.175069	0.795056	0.810864
20	4676677	G	A	0.768	0.4	0.07362	0.060301	0.591108	1.48811
11	60760575	G	A	9.031	0.38	0.25979	0.060301	0.792216	2.25689
17	54868990	C	T	0.488	0.22	0.03567	0.063197	0.748396	2.66171e-59
19	33181535	A	T	0.161	0.4	0.07304	0.056003	0.24664	0.185214
6	10995985	T	C	1.172	0.34	0.07783	0.10224	0.390733	0.306886
5	131714411	C	T	5.733	0.45	0.335	0.083675	0.58633	0.492101
20	62409453	C	T	2.456	0.27	0.03374	0.135981	0.355394	1.02128
6	97002766	A	G	1.58	0.56	0.24524	0.125526	0.433636	0.188077
12	53726866	C	G	4.173	0.4	0.11984	0.056003	0.727432	0.291836
7	35131	A	T	0.165	0.19	0.04394	0.096973	0.314471	0.185214
6	32171288	C	T	1.29	0.24	0.12875	0.060301	0.443817	0.616143
4	9943185	C	A	3.708	0.36	0.10012	0.060301	0.642874	0.306886
6	136001241	T	C	3.243	0.32	0.11972	0.063197	0.757205	1.61859e-60
5	1289277	G	A	3.615	0.42	0.02077	0.074216	0.609196	0.706704
2	202150698	G	A	5.405	0.48	0.13382	0.060301	0.723658	0.883303
6	33146053	C	G	3.463	0.51	0.16471	0.060301	0.472826	0.168198
2	43325605	G	A	1.551	0.25	0.0844	0.056003	0.392967	4.97697e-69
12	104422300	C	T	0.89	0.24	0.06153	0.060301	0.299554	0.00286289
5	35045826	A	G	2.979	0.21	0.0303	0.060301	0.692933	0.062636
5	1309434	C	T	1.093	0.35	0.05471	0.063197	0.576322	6.63552e-41
2	49201170	T	C	3.003	0.26	0.1394	0.063197	0.761506	0.388575
6	27115786	G	A	3.708	0.33	0.03934	0.064036	0.597256	0.185214
6	133407517	C	T	4.648	0.36	0.18691	0.063197	0.548089	2.13287e-12
8	67361409	G	A	3.701	0.43	0.14803	0.060301	0.595584	0.208878
16	70045889	A	C	0.401	0.15	0.07674	0.083675	0.425179	0.98529
19	50337964	T	C	3.944	0.38	0.10333	0.137589	0.695228	0.66777
3	132593134	G	A	0.311	0.25	0.08844	0.063197	0.387491	7.31647e-102
5	131652002	A	C	1.7	0.16	0.26087	0.060301	0.3491	1.55661
22	50971706	A	T	0.314	0.26	0.14621	0.104817	0.28168	0.99177
16	57004459	G	A	5.457	0.3	0.17672	0.063197	0.694534	0.353412
14	58334544	A	G	0.116	0.41	0.11263	0.060301	0.584278	0.00286289
15	68079655	G	T	16.51	0.57	0.97873	0.091713	0.787228	1.08548
3	88193493	C	T	17.3	0.69	0.8985	0.060301	0.748811	0.188077
18	58040478	G	A	1.582	0.41	0.1298	0.063197	0.458591	2.59591e-88
5	32768534	G	A	14.51	0.48	0.28535	0.063197	0.861249	1.10412
4	170873680	G	T	7.501	0.26	0.14308	0.060301	0.703251	1.13345
10	319853	G	T	1.466	0.36	0.17185	0.083675	0.605402	8.2515e-17
6	25819532	C	T	6.386	0.27	0.23389	0.060301	0.42047	1.818
12	131456847	G	A	2.659	0.32	0.08129	0.060301	0.597253	0.333487
7	92236421	G	A	4.934	0.52	0.22315	0.175069	0.61108	1.08001
11	30885783	C	T	1.937	0.51	0.08985	0.060301	0.332451	0.148273
13	78391153	C	A	10.85	0.36	0.22029	0.063197	0.562198	0.622787
4	146793391	G	A	3.929	0.38	0.11756	0.059349	0.642752	0.148273
1	171949562	C	T	5.322	0.2	0.09757	0.060301	0.622575	0.168198
3	2138834	A	G	12.03	0.4	0.1937	0.091372	0.891309	0.247757
9	4266428	G	C	0.954	0.3	0.13422	0.063197	0.567971	0.0625422
8	119966171	C	T	2.298	0.36	0.13396	0.056003	0.634811	2.35496e-89
6	32193718	T	C	1.621	0.12	0.0734	0.060301	0.481869	4.17013e-47
6	27224588	G	A	0.696	0.29	0.05067	0.083675	0.713027	1.41154e-38
7	110899634	C	T	3.082	0.33	0.06307	0.060301	0.238861	0.306886
1	172214860	A	G	3.04	0.34	0.16162	0.063197	0.77183	0.168198
6	126660740	T	C	4.184	0.34	0.12475	0.060301	0.810617	4.38054e-32
6	157097355	C	T	8.613	0.44	0.14895	0.10224	0.684093	0.991081
1	53699126	T	C	4.492	0.57	0.13227	0.137589	0.763622	0.915281
2	25368005	G	A	1.529	0.32	0.1013	0.128073	0.706281	0.188077
11	61492039	C	A	10.22	0.42	0.30672	0.060301	0.890563	0.771059
7	106302691	T	C	3.592	0.25	0.14361	0.060301	0.714478	0.185214
10	61417903	G	A	3.647	0.35	0.09889	0.102588	0.496773	0.0625422
5	147846753	C	T	1.203	0.35	0.05434	0.060301	0.639098	0.554527
20	44561920	A	G	5.46	0.39	0.09192	0.100691	0.377058	0.79723
9	22119427	T	C	9.643	0.32	0.52321	0.060301	0.703772	0.808001
5	156932954	G	C	0.728	0.2	0.09247	0.060301	0.390956	0.51579
13	54388052	C	T	21.7	0.53	0.94064	0.063197	0.733909	0.622787
8	144566217	G	C	0.177	0.38	0.07119	0.074216	0.441935	0.148273
6	14115552	G	A	18.78	0.35	0.77237	0.060301	0.860363	1.08479
1	65817637	C	T	0.008	0.18	0.02503	0.060301	0.657101	0.106622
10	104614613	C	T	8.296	0.31	0.21402	0.060301	0.806002	0.188077
8	33459013	A	G	1.636	0.58	0.03831	0.060301	0.54846	1.33969e-41
1	160852656	T	C	4.094	0.31	0.19627	0.060301	0.795754	0.0625422
5	110426697	C	G	0.819	0.19	0.10424	0.056003	0.448129	0.99177
16	11179000	C	T	3.764	0.36	0.1967	0.060301	0.694107	0.763545
6	50815514	T	A	9.065	0.31	0.50479	0.104817	0.625824	0.622787
20	9365742	C	G	1.081	0.18	0.02581	0.121303	0.363171	0.430929
1	11862331	G	A	8.458	0.13	0.26394	0.087233	0.615013	2.3294
16	60391890	C	T	9.647	0.21	0.88417	0.078618	0.88181	0
9	136132350	T	C	2.639	0.13	0.10466	0.072005	0.64882	0.312174
2	669023	C	T	6.469	0.42	0.13527	0.320204	0.777291	0.679798
3	35678946	A	T	1.619	0.24	0.07869	0.056003	0.746063	0.978463
15	37352229	T	A	1.783	0.2	0.05886	0.063197	0.428285	0.56722
7	127126049	A	G	13.41	0.36	0.1601	0.060301	0.831843	0.622787
2	192552366	G	T	0.039	0.47	0.09614	0.060301	0.415281	0.00286289
12	57525939	C	T	22.2	0.54	0.97702	0.087233	0.93541	2.38054
1	68635338	C	T	1.19	0.32	0.10673	0.060301	0.410494	0.00286289
10	81932998	C	T	9.851	0.27	0.19395	0.108573	0.781543	0.411676
2	170204925	A	G	20.5	0.32	0.96897	0.060301	0.7378	1.52621
10	131979025	A	G	3.33	0.29	0.13672	0.17184	0.675743	0.734389
9	22115078	G	T	2.285	0.25	0.19785	0.060301	0.763861	0.995187
16	11837871	G	C	1.698	0.33	0.20536	0.076284	0.49447	0.79723
5	40679567	T	C	4.764	0.38	0.11856	0.215285	0.286568	0.763545
6	109783934	A	G	7.432	0.4	0.35837	0.343423	0.702563	0.956274
21	43836781	C	A	3.533	0.13	0.09473	0.067067	0.716064	0.394092
15	79042756	G	A	3.252	0.35	0.06981	0.060301	0.182314	3.55548e-24
2	31402363	C	T	2.034	0.17	0.02581	0.063197	0.278284	0.00286289
15	73653485	A	G	5.563	0.19	0.07765	0.081037	0.703105	0.187741
7	150919383	T	A	2.435	0.22	0.20129	0.128073	0.4744	0.739411
6	117585021	G	A	2.543	0.42	0.12115	0.104817	0.543399	8.18444e-68
8	4181094	T	C	1.93	0.37	0.1125	0.060301	0.55389	0.0625422
4	25931563	T	G	5.617	0.39	0.21108	0.060301	0.486964	0.621247
14	64196135	C	T	1.645	0.44	0.03424	0.074216	0.345752	5.48171e-29
12	66228023	G	A	3.811	0.45	0.16231	0.083675	0.48224	0.429157
19	49248295	G	A	11.88	0.08	0.12526	0.091966	0.859968	0.333487
11	125181215	C	T	1.918	0.33	0.11587	0.060301	0.643266	0.174287
15	80431141	G	A	0.599	0.48	0.13178	0.060301	0.667906	1.69707e-117
1	180965055	A	G	4.878	0.38	0.07876	0.060301	0.816276	0.462695
1	208085735	G	A	3.104	0.39	0.08876	0.091372	0.794267	0.353412
3	134233594	C	A	6.774	0.39	0.06369	0.060301	0.67264	0.511471
10	13990629	T	C	4.638	0.3	0.10434	0.060301	0.819754	0.0847532
10	17260419	T	A	13.35	0.3	0.92234	0.087872	0.830786	2.78091e-45
13	113694499	T	C	1.028	0.25	0.05376	0.060301	0.207254	0.208878
15	71697440	A	C	0.61	0.23	0.02624	0.063197	0.423139	0.00286289
17	61971957	T	C	4.446	0.36	0.03049	0.060301	0.768332	0.622787
1	172193303	C	T	4.799	0.34	0.12509	0.063197	0.244191	0.353412
6	135377508	T	C	3.855	0.16	0.11912	0.060301	0.735872	0.492101
3	123094328	T	C	3.205	0.29	0.22556	0.067067	0.755169	0.573789
2	109607349	G	A	2.186	0.41	0.07046	0.060301	0.306715	1.40426e-36
1	240605898	A	G	2.232	0.22	0.0773	0.063197	0.693465	0.147794
3	49512992	C	T	2.686	0.43	0.14333	0.059349	0.206728	0.493601
20	33730464	A	G	4.01	0.27	0.15047	0.128073	0.455058	0.466112
6	127438857	C	A	15.48	0.34	0.22036	0.172434	0.863308	0.185277
6	130349913	A	G	19.19	0.4	0.97627	0.060301	0.838897	0.765879
5	131678145	G	C	8.169	0.25	0.24166	0.063197	0.66542	0.333008
4	55093395	C	T	16.41	0.46	0.18454	0.182457	0.849763	1.6714
14	68789343	G	A	4.348	0.35	0.14691	0.060301	0.570919	0.188077
11	18368643	C	T	2.422	0.42	0.06492	0.121303	0.675298	0.918245
11	61844684	G	A	7.379	0.35	0.14414	0.060301	0.829909	2.91297e-32
15	63424400	T	G	10.08	0.21	0.25887	0.083675	0.836286	0.306886
6	20722432	C	T	1.18	0.31	0.09368	0.060301	0.502354	0.148273
6	151932995	G	A	0.745	0.15	0.08673	0.060301	0.440264	0.00286289
2	234672860	G	A	3.551	0.29	0.18877	0.060301	0.664906	0.333487
16	85946894	G	A	5.116	0.34	0.15591	0.060301	0.621137	1.05916
6	116383372	T	G	4.687	0.36	0.09386	0.060301	0.539859	6.94212e-43
12	57844011	C	T	5.524	0.45	0.21373	0.083675	0.364573	0.883024
8	98655301	G	A	2.294	0.33	0.09411	0.060301	0.804745	0.185214
2	24583861	G	A	6.108	0.34	0.26811	0.125351	0.536169	2.17722
19	54786341	C	G	1.48	0.28	0.06538	0.060301	0.233225	1.75769e-30
10	123338578	C	T	2.581	0.34	0.06297	0.087233	0.676917	1.09754
10	119496352	T	C	2.192	0.55	0.133	0.127595	0.649574	0.976866
13	51382042	G	A	3.227	0.38	0.10252	0.063197	0.573282	0.00286289
17	38128919	C	G	8.703	0.28	0.20749	0.056003	0.631349	0.188077
16	53855556	T	C	3.771	0.34	0.10609	0.060301	0.776145	0.647909
12	121407739	A	T	0.418	0.4	0.04936	0.060301	0.632439	0.00286289
11	114392357	G	A	8.409	0.43	0.08249	0.063197	0.82784	5.22352e-32
6	152111666	C	T	0.467	0.31	0.07226	0.063197	0.641115	1.17115
15	99194819	T	C	15.19	0.33	0.64786	0.119651	0.803125	1.62272
6	160667867	A	G	2.318	0.29	0.11908	0.091713	0.776963	0.00286289
7	25873149	G	A	3.786	0.42	0.11333	0.060301	0.466447	1.9349e-13
13	80909769	A	C	0.692	0.35	0.16504	0.121303	0.406847	0.974304
15	28196523	A	G	1.897	0.2	0.07603	0.060301	0.336634	0.333487
19	35554751	G	A	4.775	0.11	0.18888	0.068591	0.671014	0.333487
3	119560990	C	T	2.866	0.2	0.17727	0.060301	0.440941	1.17434
10	63467619	G	A	8.971	0.32	0.39493	0.063197	0.835088	0.00286289
14	60976943	C	G	3.712	0.29	0.16031	0.182457	0.539265	0.492101
21	32918532	C	T	2.55	0.21	0.0914	0.060301	0.661229	0.587755
15	53940139	T	G	6.256	0.2	0.12783	0.060301	0.726614	0.00286289
1	17722952	T	C	2.135	0.24	0.05434	0.060301	0.660983	2.76207e-112
5	58338437	A	C	5.185	0.37	0.20787	0.063197	0.655331	1.11962
19	33452093	G	A	5.506	0.11	0.10641	0.125526	0.404326	0.188077
6	32573950	G	T	0.61	0.25	0.07711	0.060301	0.668859	3.2875e-102
11	11506024	T	C	1.258	0.24	0.03607	0.060301	0.487664	0.00286289
6	43857191	A	G	5.462	0.38	0.14278	0.060301	0.888971	4.23762e-30
19	49202125	G	A	8.569	0.36	0.13752	0.060301	0.691826	0.188077
6	4146373	A	G	1.247	0.19	0.07423	0.060301	0.497621	1.49903e-69
5	132049255	G	A	3.499	0.21	0.08028	0.060301	0.266514	0.833367
13	27641558	T	C	4.053	0.49	0.24421	0.175069	0.755544	0.784482
11	102070843	C	T	2.748	0.34	0.03242	0.060301	0.596162	0.609034
10	12878043	G	A	1.413	0.25	0.17169	0.135981	0.664996	0.988383
20	37455178	G	T	2.094	0.32	0.16007	0.087872	0.754974	0.800093
13	53613990	G	A	18.11	0.38	0.92807	0.060301	0.763069	0.685329
9	113802365	G	A	3.881	0.4	0.0572	0.056003	0.358563	4.37709e-58
7	143109124	C	T	3.836	0.43	0.12306	0.102588	0.652007	2.60723e-51
17	66382958	C	T	12.4	0.4	0.13805	0.067067	0.79246	2.25184
6	101844914	T	G	9.003	0.33	0.78036	0.060301	0.652376	0.808001
2	164490066	A	T	0.376	0.32	0.04051	0.063197	0.562038	0.00286289
9	33139685	C	T	1.17	0.4	0.12827	0.060301	0.4945	1.25993
10	105846038	A	G	0.9	0.56	0.13162	0.060301	0.547263	0.185214
5	131412276	C	T	0.988	0.4	0.11748	0.060301	0.499368	0.99177
6	134557217	A	G	4.777	0.33	0.11187	0.060301	0.561836	1.47703
6	160862579	T	C	0.395	0.52	0.08802	0.060301	0.445297	0.0847532
11	118487143	C	T	5.616	0.36	0.14306	0.128841	0.722997	0.859772
15	58722569	G	A	4.937	0.46	0.16119	0.063197	0.464732	0.881983
4	57898729	A	G	7.966	0.42	0.4479	0.068591	0.830193	0.402643
16	1037147	G	A	6.197	0.25	0.17794	0.074216	0.646641	0.617784
18	57571367	G	A	2.801	0.45	0.23035	0.331037	0.486361	0.429157
7	128576843	T	C	4.768	0.3	0.23572	0.104817	0.505081	0.185215
6	485078	G	A	3.519	0.37	0.09289	0.121303	0.210805	5.71787e-84
7	7679107	A	C	0.761	0.29	0.24508	0.100691	0.446399	0.997304
3	169098861	C	T	1.869	0.27	0.09757	0.063197	0.538297	0.462695
11	48328998	G	A	4.827	0.26	0.12697	0.063197	0.736249	0.185214
15	79042736	T	C	1.234	0.35	0.06798	0.060301	0.320839	3.55548e-24
2	134262385	C	G	18.86	0.45	0.95733	0.063197	0.712484	0.976199
6	142703499	A	C	3.752	0.3	0.25331	0.060301	0.719288	0.57833
8	128031918	G	A	8.912	0.27	0.46385	0.063197	0.870961	0.185214
3	122049181	G	C	1.892	0.42	0.19251	0.063197	0.634113	0.260237
6	142765849	C	A	3.346	0.44	0.13237	0.102588	0.488612	0.763545
22	32869623	C	T	1.355	0.39	0.09246	0.134018	0.644021	0.965428
16	56999328	C	T	2.168	0.19	0.14016	0.063197	0.498051	0.965428
20	43061975	T	G	2.593	0.32	0.21123	0.060301	0.700908	1.42002
11	88558128	T	C	0.357	0.26	0.07284	0.063197	0.465844	0.482556
3	186559425	A	G	10.95	0.85	0.40378	0.060301	0.721277	0.808001
7	116357759	C	T	21.2	0.58	0.97526	0.060301	0.574479	1.40397
4	166255789	G	T	2.019	0.22	0.15305	0.128073	0.731245	0.188077
10	50115959	C	T	2.09	0.35	0.20387	0.060301	0.511575	0.333487
12	54340622	T	C	3.366	0.24	0.17652	0.104817	0.35921	0.989035
1	47396141	G	A	2.562	0.16	0.06271	0.063197	0.460538	0.269968
15	84560382	G	A	2.838	0.38	0.11342	0.063197	0.719756	0.0847532
15	75019185	C	T	8.914	0.26	0.24813	0.182457	0.905744	0.185214
11	2481739	T	C	1.246	0.24	0.06699	0.074216	0.679476	0.440792
11	47441027	G	C	3.122	0.17	0.20869	0.12342	0.569558	1.57338
19	49208741	G	C	0.517	0.39	0.09057	0.175069	0.538985	0.971969
18	29340853	G	A	2.083	0.4	0.05468	0.063197	0.783899	0.188077
8	60034012	G	A	6.163	0.28	0.14022	0.078618	0.717913	3.65357e-50
6	31475345	T	G	1.32	0.09	0.06234	0.137589	0.39871	0.188077
6	112122180	T	C	3.492	0.26	0.1543	0.081037	0.303511	1.98521
11	96022489	C	A	2.065	0.32	0.07811	0.060301	0.610471	0.763545
10	121704635	G	A	0.093	0.41	0.04542	0.059349	0.781939	5.00686e-110
10	107024954	G	A	14.05	0.43	0.98784	0.063197	0.867482	0.892754
2	185601641	T	C	7.886	0.22	0.04017	0.060301	0.816365	0.0625422
5	141690258	T	C	10.27	0.45	0.87894	0.292527	0.729434	1.11489
19	17282832	A	G	4.086	0.23	0.03362	0.072005	0.333498	0.647909
12	56520009	T	C	6.251	0.48	0.14838	0.123371	0.702885	1.92382
12	114802095	C	G	3.559	0.26	0.20963	0.060301	0.288761	0.462698
4	88963172	G	A	3.718	0.3	0.14649	0.082826	0.635262	1.24416
6	131929454	G	A	7.888	0.4	0.06785	0.125526	0.703549	0.643444
8	89052460	A	T	8.417	0.59	0.96957	0.121303	0.770012	0.771059
6	121755313	G	A	2.87	0.34	0.06142	0.065574	0.543869	0.79723
10	65129917	T	C	4.658	0.33	0.16846	0.081037	0.790705	0.187741
20	17205071	C	T	0.114	0.28	0.11684	0.063197	0.536342	1.08675e-138
1	154418405	G	C	0.161	0.12	0.05775	0.060301	0.249946	0.809468
12	29939628	A	G	13.85	0.48	0.11505	0.060301	0.93684	4.75457e-90
9	136144578	G	C	0.303	0.18	0.15341	0.060301	0.369618	0.185214
7	38215894	G	A	8.489	0.4	0.06266	0.060301	0.799563	7.65869e-81
2	234673588	G	C	0.1	0.29	0.09075	0.060301	0.382198	0.148273
11	46743432	G	A	2.343	0.31	0.10901	0.060301	0.567652	0.718206
18	52627116	T	C	4.02	0.56	0.1342	0.060301	0.653483	0.185214
16	67225847	G	A	8.035	0.5	0.23189	0.182457	0.696123	2.7804
16	7461432	G	A	1.802	0.23	0.06987	0.060301	0.538123	0.430929
1	67630493	G	A	6.987	0.42	0.15744	0.063197	0.808918	0.188077
6	100062862	C	T	8.348	0.41	0.3012	0.182457	0.940304	0.492101
6	138051468	G	A	3.219	0.49	0.18612	0.063197	0.632817	0.185214
18	19999749	A	G	0.078	0.32	0.01784	0.060301	0.319039	3.35527e-48
10	102991131	G	A	14.49	0.38	0.18504	0.104817	0.909427	1.60791
2	19546618	A	G	3.494	0.4	0.23056	0.078618	0.718306	0.185214
9	94922307	A	C	5.374	0.42	0.16032	0.083675	0.80998	0
15	99260603	A	G	3.145	0.51	0.06081	0.083675	0.592003	0.814719
15	28513286	G	A	2.817	0.35	0.14036	0.128073	0.416131	0.481379
6	119033063	G	A	2.744	0.28	0.13652	0.063197	0.339179	2.86618e-18
19	46183979	C	G	8.597	0.14	0.22118	0.068591	0.862551	0.0625422
19	49208629	G	C	0.804	0.25	0.07991	0.083675	0.675726	0.00286289
7	107245291	T	C	4.473	0.19	0.10832	0.060301	0.827323	0.106622
2	668596	C	T	0.477	0.42	0.07111	0.231514	0.282387	0.679798
7	120758749	G	A	1.17	0.22	0.06331	0.063197	0.608026	0.800093
1	177251586	A	C	0.042	0.32	0.23569	0.060301	0.295476	3.5285e-52
9	127570710	C	A	5.653	0.36	0.13608	0.074216	0.720987	1.56079
9	98256309	G	A	6.761	0.24	0.17821	0.097409	0.611681	1.03216
1	95539778	A	G	5.827	0.24	0.06623	0.060301	0.711102	1.59498e-93
2	56092936	G	C	0.185	0.46	0.1134	0.063197	0.524021	5.00686e-110
1	19765017	C	T	11.65	0.32	0.65629	0.081037	0.729331	2.40316
18	43187427	T	C	2.255	0.28	0.12077	0.060301	0.767438	0.0625422
17	38065171	T	A	6.315	0.32	0.16018	0.083675	0.694204	0.979831
11	2850668	G	A	5.412	0.18	0.05696	0.074216	0.641839	0.626006
3	186559474	C	G	4.76	0.86	0.20908	0.060301	0.692356	0.185214
8	12979786	T	C	14.06	0.38	0.15584	0.087872	0.900967	0.247757
2	191936383	A	G	2.395	0.31	0.10864	0.060301	0.384401	0.450881
1	23710342	G	A	6.178	0.31	0.20414	0.091372	0.533998	1.14288
6	13713366	G	C	0.891	0.22	0.08326	0.112256	0.425326	0.668897
8	9185182	C	G	5.796	0.14	0.19463	0.063197	0.709877	6.35801e-09
8	26205397	G	C	2.172	0.37	0.11333	0.081037	0.691472	1.55533
16	85955545	C	T	2.647	0.19	0.17891	0.060301	0.578742	0.44714
9	136135194	G	A	2.887	0.14	0.08647	0.074216	0.56045	1.62675e-31
5	170846460	C	A	19.69	0.4	0.45638	0.172434	0.936232	0.647909
5	133900880	T	A	8.182	0.17	0.15253	0.082826	0.732028	0.431535
17	70122962	C	T	3.302	0.41	0.17375	0.059349	0.623716	1.15913
2	118844183	T	C	0.578	0.36	0.14671	0.060301	0.639057	0.79723
6	151814133	T	C	1.593	0.48	0.02587	0.091372	0.437265	1.68006e-28
2	196519839	C	T	9.662	0.46	0.08865	0.060301	0.742303	0.269968
19	33532128	T	C	5.653	0.3	0.21092	0.096973	0.58511	1.75038
6	159467516	A	T	11.71	0.48	0.35021	0.063197	0.872917	0.808001
13	106112252	T	G	7.293	0.39	0.22011	0.060301	0.795638	1.17655e-31
13	95923115	C	T	6.18	0.18	0.13654	0.091713	0.866124	0.247757
9	111807856	A	T	5.173	0.26	0.14589	0.121303	0.852429	0.00286289
3	36868175	A	G	1.488	0.4	0.06723	0.063197	0.378722	1.48361e-65
19	21666116	A	G	5.455	0.38	0.04227	0.123371	0.37534	0.188077
16	88840748	G	A	4.511	0.28	0.14599	0.091713	0.70232	0.800093
6	38367437	C	T	5.781	0.5	0.16985	0.063197	0.69418	0.770372
1	152488846	T	G	6.631	0.26	0.18892	0.074216	0.414349	0.808001
6	121770464	A	T	11.25	0.5	0.82407	0.320204	0.803321	1.19369
2	165540988	A	G	3.464	0.24	0.12439	0.063197	0.737142	0.0625422
6	32441934	T	C	1.713	0.29	0.07134	0.066767	0.459555	0.185214
13	99956783	A	G	4.379	0.31	0.1863	0.060301	0.645521	0.291836
1	7879130	T	G	6.518	0.14	0.26804	0.121303	0.588763	0.92864
21	17100557	C	T	2.05	0.31	0.1254	0.060301	0.412919	0.991129
18	10736751	A	G	3.411	0.39	0.16764	0.083675	0.754288	0.00286289
4	89885055	G	A	2.865	0.33	0.26348	0.083675	0.512038	0.333487
1	22776765	C	A	1.201	0.45	0.11059	0.060301	0.399437	3.58659e-97
10	115479784	C	A	5.463	0.29	0.17046	0.060301	0.751742	1.73831
6	25608009	C	T	2.809	0.15	0.15625	0.060301	0.600339	0.188077
17	68163960	G	A	5.729	0.4	0.16548	0.063197	0.474743	0.185214
16	165374	T	C	2.961	0.22	0.08586	0.060301	0.671718	0.148273
5	174151169	T	C	10.69	0.44	0.19679	0.182457	0.743454	2.20529
5	110859853	G	T	1.828	0.24	0.1353	0.060301	0.525089	1.15253e-06
15	58722568	C	T	2.84	0.44	0.15095	0.063197	0.905423	0.881983
2	220029544	G	C	0.021	0.48	0.04464	0.121303	0.34451	0.0964537
1	165394593	C	G	3.527	0.22	0.15178	0.063197	0.47546	0.778665
1	156169304	G	A	8.446	0.39	0.18579	0.231597	0.724301	1.73252
8	19673346	G	A	0.457	0.47	0.05926	0.091372	0.399149	3.10321e-41
6	142679648	C	T	13.5	0.37	0.78154	0.060301	0.618818	1.38633
16	4038006	G	C	2.53	0.22	0.04135	0.074216	0.448123	0.269968
12	49464221	T	C	5.868	0.35	0.27526	0.112256	0.710196	1.40345
1	114999576	A	G	1.476	0.33	0.07829	0.121303	0.480521	0.57833
16	11682944	G	A	0.303	0.49	0.13648	0.060301	0.55495	0.372955
8	124659083	G	C	3.591	0.26	0.24688	0.060301	0.470238	1.60739
5	56249251	A	G	3.57	0.4	0.05633	0.121075	0.671732	0.983674
4	15734200	C	G	3.643	0.51	0.10171	0.063197	0.675832	0.0625422
19	50926565	C	T	5.542	0.2	0.16586	0.072005	0.675347	1.33571
5	110406516	C	G	9.956	0.25	0.18229	0.172434	0.793518	1.4202
10	111736749	G	T	1.473	0.34	0.22645	0.060301	0.555519	1.56993
17	68172600	G	A	11.97	0.46	0.96125	0.063197	0.890479	0.936697
1	227914429	C	G	5.446	0.35	0.19049	0.059349	0.553594	0.185214
1	65696034	G	C	1.785	0.36	0.62037	0.283776	0.68408	0.247757
1	26741106	T	C	3.356	0.12	0.20764	0.100691	0.46924	0.785513
11	117532709	G	A	3.611	0.31	0.17165	0.060301	0.624297	0.147794
2	60718708	G	A	2.397	0.18	0.09315	0.059349	0.940335	1.15221
11	133767410	G	A	13.88	0.52	0.22098	0.292756	0.749456	1.60986
22	29301144	C	T	0.354	0.47	0.03156	0.099841	0.631674	0.148273
8	82026179	A	G	3.339	0.56	0.18953	0.091372	0.749814	9.09084e-39
6	162000579	T	G	5.898	0.45	0.15799	0.063197	0.795623	0.753894
12	24738861	G	A	6.112	0.37	0.19416	0.060301	0.552433	5.99182e-17
17	16844863	C	A	2.775	0.24	0.12562	0.060301	0.739165	0.796488
12	1614066	G	C	1.516	0.45	0.12246	0.074216	0.610611	0.185214
1	207941718	C	T	3.316	0.25	0.13949	0.231597	0.246767	0.361897
20	57584032	C	T	4.029	0.41	0.16245	0.060301	0.462324	0.185214
6	32707371	G	A	1.292	0.13	0.06315	0.060301	0.433365	2.54278e-80
11	35329820	A	C	3.392	0.35	0.16509	0.060301	0.39084	0.366074
9	4291773	C	T	3.834	0.29	0.08728	0.063197	0.632047	0.0625422
19	49094856	C	T	9.453	0.44	0.59682	0.060301	0.636986	1.38633
6	34555389	T	C	6.455	0.59	0.17836	0.327786	0.690172	0.188077
15	89056003	A	C	0.433	0.46	0.14944	0.175069	0.644993	0.333487
16	16127378	C	T	5.666	0.29	0.16307	0.060301	0.385843	1.93026
12	92378307	T	C	1.962	0.3	0.10839	0.091713	0.477328	0.99095
17	68173022	C	T	13.85	0.48	0.93017	0.063197	0.918208	0.936697
4	189060169	A	C	0.205	0.31	0.16358	0.060301	0.639458	5.98532e-63
3	188580837	T	C	2.014	0.34	0.16594	0.060301	0.524446	0.208878
3	119260226	G	T	0.235	0.42	0.08685	0.060301	0.768078	0.333487
1	240045978	A	T	0.47	0.18	0.03511	0.060301	0.311862	0.547112
6	160959433	T	C	2.988	0.28	0.08031	0.063197	0.493435	0.296164
1	9409340	C	T	2.235	0.22	0.11735	0.074216	0.798172	0.748779
4	75670976	T	C	6.027	0.28	0.15583	0.063197	0.851923	0.12696
2	71687185	C	G	3.333	0.21	0.14575	0.091372	0.722887	0.333008
16	1837107	G	A	3.965	0.28	0.12757	0.129117	0.300043	0.836066
10	105674095	T	C	1.226	0.3	0.08576	0.060301	0.622117	0.226462
5	172194873	C	T	0.592	0.29	0.12293	0.12342	0.646539	3.63782
17	7559037	C	T	13.23	0.39	0.1924	0.258966	0.926452	1.04485
17	68173533	C	T	8.313	0.36	0.22601	0.078618	0.734712	0.936697
8	129076509	C	T	4.417	0.34	0.11757	0.059349	0.809692	1.77098
2	33702375	C	T	8.697	0.14	0.23131	0.060301	0.731847	0.499125
8	98654487	G	T	1.464	0.32	0.15079	0.072005	0.650707	2.41267e-21
15	93967740	G	A	5.172	0.27	0.11921	0.060301	0.493173	7.08139e-12
19	10211507	G	A	4.163	0.32	0.14193	0.074216	0.555791	1.06282
1	196686859	A	G	0.253	0.28	0.04521	0.076284	0.341648	0.345882
4	123161963	G	T	12.37	0.37	0.8797	0.060301	0.810594	0.106627
3	187868821	G	A	2.153	0.36	0.14288	0.059349	0.599215	0.79723
14	73033703	A	G	6.04	0.23	0.28862	0.060301	0.608449	0.185214
17	45013146	C	T	9.417	0.59	0.24899	0.231514	0.753531	1.12185
6	138198982	C	T	6.284	0.3	0.16848	0.128073	0.704982	0.865012
11	64356942	C	T	9.662	0.41	0.65126	0.091372	0.563852	0.611585
17	57848739	C	T	14.26	0.38	0.70398	0.060301	0.900102	0.188077
6	49398115	C	T	0.428	0.5	0.05285	0.078618	0.515368	0.148273
1	200102178	C	T	3.123	0.31	0.12185	0.060301	0.383739	0.554527
22	35712553	A	G	1.147	0.18	0.06806	0.060301	0.274742	0.51579
17	73871911	G	A	5.252	0.25	0.1396	0.134018	0.552975	1.28522
2	65222951	T	A	15.4	0.56	0.794	0.060301	0.87231	0.929672
22	29451656	A	G	15.27	0.57	0.87689	0.209056	0.698829	0.945503
15	78774374	A	G	6.6	0.15	0.11706	0.099841	0.784644	0.679798
1	78693968	C	T	20.5	0.68	0.9566	0.056003	0.804802	0.622787
12	6307788	C	T	9.12	0.4	0.1553	0.104817	0.796785	1.16163
8	134146011	C	A	5.801	0.13	0.13096	0.060301	0.877765	0.296164
12	45833755	G	A	5.942	0.42	0.08973	0.063197	0.875471	0.148273
16	58770075	G	T	1.89	0.26	0.1017	0.060301	0.291243	0.185214
1	2501222	G	T	1.498	0.26	0.0781	0.067067	0.653748	1.29207e-27
1	65993287	C	T	4.792	0.2	0.27335	0.056003	0.683472	1.03216
12	21388905	G	T	1.206	0.1	0.03011	0.063197	0.245638	0.00286289
6	34765955	T	C	5.351	0.29	0.15019	0.060301	0.834796	0.148273
3	30767494	C	T	7.644	0.29	0.32131	0.063197	0.638953	1.58934e-22
20	34026914	C	T	5.487	0.46	0.07289	0.050388	0.713945	1.09339
6	161017584	C	G	6.423	0.32	0.14559	0.063197	0.663157	0.296164
9	123635903	T	C	7.445	0.4	0.14657	0.280822	0.717875	4.30583
15	78805789	G	C	0.074	0.51	0.08928	0.056003	0.463211	0.00286289
12	16188854	C	T	10.85	0.66	0.29473	0.099841	0.572256	0.684864
6	80845754	A	G	1.506	0.1	0.06715	0.060301	0.446055	0.226462
11	8253766	G	T	13.46	0.45	0.74388	0.060301	0.800235	0.573789
7	72968823	T	C	7.371	0.52	0.1159	0.068591	0.804774	0.333487
2	65598141	G	A	7.379	0.58	0.27169	0.081037	0.50823	2.09981
8	11045151	A	C	11.69	0.24	0.89365	0.081037	0.890148	0.62565
12	123795826	C	T	5.691	0.33	0.1599	0.137589	0.548219	0.0847532
15	74307279	C	T	0.858	0.29	0.0558	0.060301	0.324771	0.809468
3	169300113	A	C	2.38	0.37	0.36182	0.063197	0.699875	0.774088
13	48516687	T	C	3.404	0.43	0.11116	0.128073	0.486589	0.280326
1	165735496	G	A	3.26	0.42	0.07771	0.060301	0.757614	0.763545
18	29178983	G	A	3.686	0.36	0.2315	0.060301	0.318845	0.622786
6	32611792	A	G	2.341	0.32	0.13225	0.063197	0.598049	0.492101
5	88147889	A	G	4.595	0.34	0.1316	0.063197	0.521048	0.954569
12	66250092	A	G	0.872	0.41	0.1314	0.060301	0.594438	0.188077
11	5264263	T	C	3.292	0.28	0.21888	0.063197	0.711228	0.79723
9	114301469	C	T	3.361	0.17	0.1593	0.121303	0.458691	0.333487
7	139505018	A	G	5.349	0.26	0.1161	0.063197	0.6986	0.148273
22	29621989	G	A	5.236	0.37	0.19425	0.127595	0.466793	1.15534
9	13488003	C	T	12.83	0.53	0.80686	0.060301	0.649951	0.808001
1	230297778	A	T	0.336	0.33	0.13864	0.060301	0.673657	0.148273
1	65979457	C	T	12.16	0.51	0.64441	0.063197	0.374596	1.65495
14	74990679	G	A	2.499	0.24	0.12822	0.060301	0.592086	1.56333
16	52635209	A	G	5.801	0.21	0.20956	0.063197	0.515811	0.622787
6	31172225	G	A	1.505	0.2	0.20567	0.060301	0.49713	0.185214
6	31383108	T	C	0.979	0.31	0.03573	0.137589	0.307269	1.20842e-63
12	66336406	C	T	4.369	0.38	0.13391	0.060301	0.598983	0.243943
5	1283095	C	T	6.102	0.38	0.2931	0.129117	0.632524	0.706704
6	32635687	T	C	1.031	0.22	0.07373	0.060301	0.421401	0.587857
20	12987716	C	A	7.63	0.33	0.16274	0.063197	0.823575	0.185214
1	209755450	G	A	0.708	0.32	0.07257	0.060301	0.627948	2.90863e-132
18	53213326	G	A	4.122	0.38	0.08309	0.083675	0.672559	0.992331
19	8272775	T	A	2.647	0.21	0.03793	0.060301	0.366609	0.00286289
13	93946055	T	C	15.06	0.42	0.33189	0.060301	0.829575	1.7269
6	135376930	T	C	4.963	0.27	0.17265	0.091713	0.770973	1.29866
6	159466615	C	A	6.419	0.57	0.18879	0.060301	0.743584	0.185214
6	31505887	T	C	9.342	0.28	0.06302	0.082826	0.84016	0.361897
6	151903361	C	T	1.222	0.39	0.04576	0.060301	0.535763	0.00286289
9	136150317	C	G	7.943	0.27	0.14349	0.125351	0.393834	0.185214
20	56070964	C	T	0.793	0.17	0.05414	0.060301	0.648248	3.10321e-41
17	2069886	G	C	9.719	0.41	0.4001	0.078125	0.837568	0.260237
9	126524436	C	T	0.952	0.41	0.13026	0.134018	0.713192	1.37556
1	6146203	C	T	0.458	0.2	0.05767	0.074216	0.489941	0.306886
9	34730754	G	A	7.695	0.4	0.25999	0.083675	0.568467	0.622787
16	308108	C	G	1.95	0.22	0.17138	0.060301	0.38439	0.333487
12	28126776	T	C	2.874	0.39	0.15322	0.127595	0.64437	0.991078
1	98502594	A	C	2.589	0.28	0.10422	0.063197	0.743718	1.60805e-42
3	182760541	A	C	1.25	0.35	0.12837	0.121303	0.57263	0.57833
10	62321562	G	C	0.039	0.4	0.06737	0.063197	0.529561	0.345882
6	31143529	C	G	2.105	0.17	0.10692	0.106748	0.709834	0.857972
2	678241	T	C	8.127	0.43	0.2634	0.112256	0.832222	0.865012
22	29100889	C	A	5.727	0.22	0.16361	0.121303	0.424522	1.15534
17	65901203	G	A	3.392	0.49	0.07036	0.059349	0.774088	0.462695
4	156586949	C	T	1.863	0.29	0.12633	0.091372	0.355091	8.44231e-80
11	31407788	G	A	6.385	0.23	0.06064	0.083675	0.63891	0.148273
4	89063985	G	A	3.069	0.22	0.03518	0.060301	0.536464	0.187741
6	102518312	A	G	3.993	0.4	0.16153	0.063197	0.468654	8.49529e-36
1	120516618	C	T	5.409	0.51	0.20894	0.059349	0.739139	0.599268
18	71017503	G	A	1.52	0.33	0.11411	0.060301	0.477809	1.50066e-23
2	61081184	A	G	1.354	0.16	0.09538	0.063197	0.507409	1.57172e-126
2	118689345	T	C	12.14	0.37	0.51005	0.060301	0.941273	0.12696
12	45825040	G	A	3.885	0.28	0.17449	0.292756	0.742636	0.333487
15	69070707	T	C	2.383	0.28	0.09206	0.121303	0.587847	0.185214
6	41348718	G	A	3.002	0.31	0.08456	0.091372	0.674656	1.23367e-71
2	42103300	T	C	2.892	0.31	0.14416	0.060301	0.66556	1.1715e-51
22	32882121	G	A	2.653	0.22	0.11571	0.060301	0.279877	0.353412
3	121995415	C	T	4.373	0.39	0.09771	0.063197	0.709949	0.394092
15	75019623	T	C	0.412	0.36	0.09409	0.104817	0.347964	1.05815e-89
13	80909943	C	T	5.858	0.41	0.15144	0.121303	0.730533	3.61598e-46
18	58041715	G	A	0.04	0.41	0.0325	0.063197	0.134082	1.18368e-55
1	169101526	C	T	12.87	0.55	0.95208	0.331037	0.833822	0.996575
8	10683420	C	A	1.301	0.14	0.24875	0.128073	0.416468	1.01054
10	93348014	A	G	15.68	0.36	0.60349	0.063197	0.685646	2.2165
15	35047364	G	A	8.685	0.65	0.23337	0.172434	0.939918	0.333487
10	51549533	T	G	3.097	0.45	0.11611	0.060301	0.814956	0.306886
6	136171069	C	T	2.106	0.39	0.07067	0.063197	0.793967	6.46268e-54
1	117038382	T	G	1.601	0.23	0.09683	0.060301	0.581858	0.185214
2	67637449	A	G	3.789	0.45	0.12748	0.125526	0.61703	0.00286289
11	107372953	A	C	1.57	0.28	0.09023	0.128073	0.736287	7.26684e-22
4	145564168	T	C	1.312	0.4	0.0802	0.056003	0.638129	1.00483e-69
8	130495914	C	T	7.801	0.45	0.34022	0.060301	0.544284	0.808001
8	19824896	T	G	3.716	0.34	0.17745	0.060301	0.508642	1.0674e-15
12	111841921	T	C	7.724	0.52	0.29863	0.123371	0.747096	2.2165
7	14184379	T	C	6.298	0.4	0.20164	0.060301	0.777462	1.61412
16	58209063	T	A	7.927	0.13	0.1441	0.121303	0.784003	0.989128
14	79935983	G	C	1.337	0.4	0.19136	0.060301	0.598473	0.759858
22	37521478	G	A	1.566	0.39	0.09901	0.074216	0.547193	0.359501
11	72464514	A	G	7.019	0.39	0.26093	0.074216	0.785551	1.14932
6	32635481	C	G	6.52	0.29	0.24814	0.060301	0.779891	0.587859
10	90748338	T	C	5.949	0.25	0.16485	0.056003	0.828733	0.388575
13	113753128	A	G	3.075	0.43	0.13304	0.129117	0.405526	0.394092
11	100173388	T	C	2.473	0.39	0.09293	0.063197	0.720649	0.00286289
11	2182210	G	A	2.648	0.53	0.19361	0.074216	0.548119	0.554527
1	206973277	C	T	5.576	0.08	0.05165	0.060301	0.593331	0.616961
4	95224768	T	A	5.636	0.18	0.15926	0.060301	0.637961	0.188077
2	61205606	G	T	1.757	0.4	0.10839	0.060301	0.785876	0.865012
6	31102372	G	A	3.811	0.09	0.06701	0.060301	0.869806	0.00286289
9	117570266	C	T	0.821	0.36	0.08218	0.060301	0.615538	2.4544e-105
10	65121644	G	A	0.741	0.47	0.07279	0.060301	0.316587	0.372955
10	18734311	A	G	5.381	0.31	0.1123	0.063197	0.519731	0.729408
16	79635540	C	G	7.026	0.49	0.20769	0.125351	0.462929	1.38498
6	7726057	A	G	9.66	0.33	0.19644	0.182457	0.488425	2.11947
10	65279908	C	G	5.098	0.42	0.20611	0.112256	0.634381	0.185214
7	15240080	A	G	3.377	0.28	0.16058	0.060301	0.73455	0.00286289
13	24206091	T	C	0.886	0.36	0.09465	0.091713	0.395403	0.647909
14	55347834	C	T	0.081	0.19	0.0258	0.060301	0.658938	0.440792
13	106112426	C	G	0.316	0.49	0.14426	0.060301	0.402051	4.5224e-148
4	75022116	T	C	6.322	0.27	0.15499	0.060301	0.764553	0.00286289
4	86640049	A	T	0.805	0.24	0.0468	0.063197	0.216717	0.57833
21	43835855	A	C	0.972	0.28	0.35418	0.076284	0.409548	1.00611
6	32707783	A	G	1.927	0.33	0.10293	0.060301	0.48733	1.71844e-29
2	43553263	T	G	7.056	0.41	0.21532	0.063197	0.5087	1.41927
5	150469048	T	A	5.196	0.36	0.16066	0.060301	0.628464	0.696686
2	75927650	C	A	7.962	0.28	0.09348	0.121303	0.784541	0.00286289
20	57469227	C	G	10.2	0.28	0.15526	0.183572	0.590844	1.00522
5	36303067	G	A	4.157	0.43	0.07149	0.060301	0.157292	0.796799
18	53054961	G	A	19.44	0.57	0.88683	0.059349	0.820343	2.59105
7	66421387	G	A	2.75	0.34	0.10304	0.331037	0.270081	0.00286289
1	108359505	T	C	4.395	0.28	0.06511	0.060301	0.508455	0.549175
12	58162121	C	G	8.161	0.27	0.30693	0.12342	0.754913	0.62565
8	119966333	T	A	4.384	0.32	0.09694	0.056003	0.803363	2.83208e-83
5	11084808	C	T	4.737	0.31	0.15654	0.063197	0.622917	0.430929
4	157720253	T	C	7.317	0.43	0.07471	0.076284	0.811616	1.11639
[truncated: 970 more rows]

## Sheet: test_splicing_deleterious
Chromosome	Position	Reference allele	Observed allele	CADD score	GWAVA score	FATHMM score	FitCons score	DANN score	FunSeq2 score
2	11727507	G	A	1.744	0.17	0.11012	0.602189	0.547437	0.679798

## Sheet: test_splicing_neutral
Chromosome	Position	Reference allele	Observed allele	CADD score	GWAVA score	FATHMM score	FitCons score	DANN score	FunSeq2 score
2	11682944	G	C	2.038	0.37	0.30338	0.091713	0.736873	2.09961

## Sheet: test_missense_deleterious
Chromosome	Position	Reference allele	Observed allele	CADD score	GWAVA score	FATHMM score	FitCons score	DANN score	FunSeq2 score	MAPP prediction	MAPP score	PhD-SNP prediction	PhD-SNP reliability index	PolyPhen-1 prediction	PolyPhen-2 score	SIFT score	SNAP prediction	SNAP score	PredictSNP1 prediction	PredictSNP1 score
6	32363816	T	C	16.31	0.26	0.00465	0.547309	0.597565	2	Deleterious	0.890161	Neutral	8	Benign	1	0.17	Neutral	8	Neutral	0.75
22	29121087	A	G	22.7	0.59	0.9437	0.724815	0.998382	4	Neutral	0.122475	Disease	0	Benign	0.116	0.01	Neutral	3	Neutral	0.63
2	234669144	G	A	13.57	0.47	0.33906	0.547309	0.99696	3	Neutral	0.527377	Disease	7	Benign	0.964	0.03	Neutral	5	Neutral	0.6
17	43923683	A	G	5.89	0.13	0.00295	0.578056	0.437272	1	Deleterious	0.828136	Neutral	9	Benign	0.98	1	Neutral	7	Neutral	0.74
22	42526694	G	A	17.45	0.28	0.985	0.696353	0.998843	2	Neutral	0.27086	Disease	4	Benign	1	0.01	Non-neutral	2	Deleterious	0.72
6	151936677	G	A	14.89	0.28	0.53578	0.491513	0.8554	2	Neutral	0.998695	Neutral	7	Benign	0.948	0.29	Neutral	6	Neutral	0.74

## Sheet: test_missense_neutral
Chromosome	Position	Reference allele	Observed allele	CADD score	GWAVA score	FATHMM score	FitCons score	DANN score	FunSeq2 score	MAPP prediction	MAPP score	PhD-SNP prediction	PhD-SNP reliability index	PolyPhen-1 prediction	PolyPhen-2 score	SIFT score	SNAP prediction	SNAP score	PredictSNP1 prediction	PredictSNP1 score
6	32317568	G	A	12.6	0.18	0.04503	0.573888	0.997033	2	Neutral	0.915757	Neutral	7	Benign	0.324	0.19	Neutral	2	Neutral	0.83
22	42526763	C	T	2.144	0.2	0.01174	0.696353	0.731318	1	Neutral	0.586309	Neutral	3	Benign	0.514	0.14	Neutral	6	Neutral	0.74
17	43226796	C	A	10.46	0.49	0.17294	0.504199	0.935117	3	Neutral	0.741052	Neutral	7	Benign	0.314	0.35	Non-neutral	1	Neutral	0.63
6	151744739	T	A	19.34	0.4	0.70695	0.65145	0.862185	2	Neutral	0.0881134	Neutral	8	Benign	0.99	1	Neutral	5	Neutral	0.68
22	29091147	A	C	22.7	0.54	0.98921	0.643519	0.96343	4	Neutral	0.294508	Neutral	5	Benign	0.752	0	Neutral	6	Neutral	0.63
2	234669259	T	C	13.04	0.42	0.68724	0.547309	0.811257	3	Neutral	0.199313	Neutral	6	Benign	0.996	0.23	Neutral	6	Neutral	0.75

## Sheet: test_synonymous_deleterious
Chromosome	Position	Reference allele	Observed allele	CADD score	GWAVA score	FATHMM score	FitCons score	DANN score	FunSeq2 score
6	25916979	C	T	11.3	0.28	0.02017	0.573888	0.751499	0
19	54697079	C	T	8.432	0.27	0.01271	0.702456	0.871729	0
6	32190406	A	G	0.11	0.13	0.00541	0.547309	0.503431	0
1	169551682	T	C	1.591	0.41	0.1357	0.573888	0.528814	0
21	37833307	C	T	0.377	0.21	0.04677	0.547309	0.770059	0
20	48522330	G	A	7.024	0.27	0.78516	0.724815	0.635293	0
10	100147060	A	G	5.28	0.17	0.76488	0.658983	0.614427	0
1	155162067	C	T	7.079	0.23	0.00046	0.723109	0.525687	0
5	176378574	G	T	2.153	0.46	0.0921	0.724815	0.451323	0
11	61551356	T	C	12.88	0.3	0.0788	0.643519	0.755405	0
6	30075864	A	G	16.44	0.21	0.02076	0.59043	0.936464	0
15	78911181	T	C	14.64	0.47	0.42718	0.596874	0.651487	0
4	57798189	G	A	2.132	0.26	0.08563	0.724815	0.350984	0
17	44828931	G	A	17.12	0.55	0.38732	0.709663	0.856807	0
17	62007498	A	G	4.482	0.24	0.00354	0.658983	0.503468	0
15	89398105	C	T	9.982	0.12	0.89882	0.602189	0.436037	0
15	89388905	C	T	6.448	0.16	0.02924	0.576033	0.319438	0
9	27556780	G	A	11.82	0.35	0.8524	0.724815	0.712615	0
4	24578097	C	T	13.7	0.43	0.54263	0.702456	0.646609	0
17	79596811	C	T	13.67	0.61	0.00897	0.724815	0.715102	0
1	197070776	C	T	9.506	0.23	0.14282	0.643519	0.635812	0
5	138861146	C	G	3.408	0.21	0.02014	0.48864	0.345262	0
12	70954464	C	T	15.04	0.24	0.16345	0.602189	0.503823	0
17	57287454	A	G	6.613	0.54	0.01675	0.52208	0.482617	0
6	31930351	A	G	18	0.36	0.16444	0.697927	0.621928	0
15	78894339	G	A	6.472	0.34	0.93771	0.696353	0.555254	0
15	78789488	C	T	15.79	0.4	0.11658	0.724815	0.679002	0
1	196654324	A	C	0.004	0.29	0.02172	0.573888	0.428123	0
3	49701983	G	A	11.18	0.3	0.12477	0.576033	0.689942	0
16	75263661	G	A	15.13	0.53	0.7408	0.702456	0.906077	0
10	37508450	A	C	0.002	0.17	0.01487	0.573888	0.455775	0
2	73746923	C	T	1.041	0.25	0.01947	0.658983	0.911073	0

## Sheet: test_synonymous_neutral
Chromosome	Position	Reference allele	Observed allele	CADD score	GWAVA score	FATHMM score	FitCons score	DANN score	FunSeq2 score
15	78786365	T	G	10.11	0.67	0.8104	0.724815	0.662782	0
1	196646655	T	C	0.247	0.13	0.02673	0.573888	0.537422	0
4	57798144	A	G	0.022	0.3	0.31783	0.724815	0.380843	0
1	155161833	C	G	3.166	0.31	0.01561	0.645312	0.510806	0
15	89389082	C	T	10.58	0.19	0.01136	0.576033	0.538048	0
6	30078330	C	T	2.828	0.27	0.00304	0.577349	0.589051	0
20	48522264	G	A	7.068	0.25	0.80795	0.724815	0.525296	0
16	75263739	G	A	9.714	0.53	0.3056	0.702456	0.700172	0
10	37507982	A	C	0.002	0.15	0.21935	0.573888	0.465119	0
15	78894357	G	T	9.292	0.22	0.85505	0.696353	0.821256	3
3	49701959	A	G	6.456	0.45	0.80836	0.576033	0.755776	0
2	73747139	A	C	0.002	0.35	0.04548	0.709663	0.417071	0
6	31930324	G	A	11.77	0.39	0.02526	0.697927	0.834514	0
10	100144822	G	A	9.177	0.13	0.73976	0.709663	0.856536	0
1	169677679	A	G	16.42	0.19	0.0852	0.573888	0.679645	0
11	61553564	C	T	10.3	0.48	0.11018	0.696353	0.659853	0
4	24578019	G	A	12.73	0.44	0.85042	0.702456	0.743119	0
12	70949831	A	G	3.034	0.39	0.29489	0.602189	0.656296	0
17	44845737	G	A	10.52	0.4	0.45172	0.687403	0.629377	0
15	78909452	T	C	5.616	0.21	0.26442	0.658983	0.669206	0
6	25916949	C	T	13.78	0.26	0.14837	0.573888	0.507074	0
5	138857098	C	T	6.794	0.21	0.00832	0.602189	0.581763	0
5	176395667	C	T	12.51	0.46	0.60704	0.724815	0.469845	0
17	57287667	T	C	17.66	0.25	0.17478	0.672317	0.697682	0
17	62007552	G	A	7.785	0.2	0.0291	0.658983	0.461683	0
19	54696167	C	A	15.88	0.23	0.35543	0.685571	0.814408	0
15	89401825	T	C	0.002	0.26	0.47915	0.658983	0.346055	0
21	37833304	G	A	12.72	0.32	0.9159	0.547309	0.67693	0
9	27562451	A	G	10.31	0.25	0.90771	0.709663	0.823481	0
17	79618706	G	A	12.85	0.28	0.03384	0.645312	0.885071	0
1	197070761	T	C	1.839	0.27	0.21219	0.643519	0.564552	0
6	32189032	T	C	0.022	0.15	0.00698	0.547309	0.489901	0

## Sheet: test_nonsense_deleterious
Chromosome	Position	Reference allele	Observed allele	CADD score	GWAVA score	FATHMM score	FitCons score	DANN score	FunSeq2 score
19	49206674	G	A	37	0.3	0.88638	0.658983	0.99536	3

## Sheet: test_nonsense_neutral
Chromosome	Position	Reference allele	Observed allele	CADD score	GWAVA score	FATHMM score	FitCons score	DANN score	FunSeq2 score
19	49206298	C	T	35	0.24	0.14954	0.658983	0.9976	3

[truncated: 10 more sheets: train_regulatory_deleterious, train_regulatory_neutral, train_splicing_deleterious, train_splicing_neutral, train_missense_deleterious, train_missense_neutral, train_synonymous_deleterious, train_synonymous_neutral, train_nonsense_deleterious, train_nonsense_neutral]
