# Supplementary material for: PredictSNP2: A Unified Platform for Accurately Evaluating SNP Effects by Exploiting the Different Characteristics of Variants in Distinct Genomic Regions
Source: PLoS Comput Biol. 2016 May 25;12(5):e1004962. doi: 10.1371/journal.pcbi.1004962 (PMC4880439; doi:10.1371/journal.pcbi.1004962)
Supplement: S3 Dataset — (XLSX) [file pcbi.1004962.s003.xlsx]

## Sheet: test_regulatory_deleterious
Chromosome	Position	Reference allele	Observed allele	CADD score	GWAVA score	FATHMM score	FitCons score	DANN score	FunSeq2 score
10	47915898	A	G	0.123	0.309409	0.94692	0.618467	0.65158	0
16	64982659	G	T	5.213	0.43	0.33259	0.573888	0.499286	0
16	29107568	A	G	15.49	0.6	0.92585	0.183335	0.948411	0.185214
20	30368810	A	G	5.078	0.42	0.08871	0.446627	0.121401	2
6	30025285	C	T	5.709	0.29	0.07224	0.137589	0.469577	0.622787
9	127215772	C	G	12.68	0.18	0.77405	0.606814	0.788942	2
2	95522772	T	C	1.314	0.406026	0.06894	0.072005	0.339441	0.185214
16	83984776	A	C	1.643	0.35	0.05415	0.596394	0.583753	3
19	10163267	G	A	5.586	0.46	0.15632	0.060301	0.642281	0.808001
1	31902418	A	G	1.071	0.33	0.15458	0.602189	0.729427	1
19	51671008	C	T	4.892	0.37	0.1255	0.060301	0.99623	0.185217
6	3045682	G	C	7.482	0.46	0.95166	0.060301	0.584542	0.185214
3	12317736	A	G	1.899	0.35	0.0673	0.063197	0.174459	1.75769e-30
15	80215601	C	T	13.47	0.24	0.92155	0.519653	0.893875	1
12	57111948	G	T	7.483	0.24	0.50361	0.536957	0.682923	3
1	200337896	C	T	6.679	0.45	0.15252	0.633826	0.442231	0.185214
1	12954982	G	A	24.7	0.24	0.10059	0.573888	0.978722	2
10	33495156	A	C	2.025	0.15	0.17125	0.547309	0.785047	2
1	161200709	C	T	22.3	0.41	0.95384	0.536957	0.994532	-0.04856
1	148741720	T	C	0.857	0.22	0.02767	0.653264	0.256991	1
8	74128497	C	G	10.63	0.43	0.93564	0.083675	0.809747	0.185214
6	163587266	C	A	12.39	0.19	0.24207	0.547309	0.988207	1
20	29632643	T	C	21.4	0.58	0.96287	0.565031	0.989864	2
20	17640580	T	G	5.274	0.51	0.17126	0.630245	0.654726	0
16	29496723	A	G	1.706	0.44	0.05597	0.709663	0.371174	0
3	12942408	G	A	8.716	0.42	0.43263	0.723109	0.52115	-1.31203
20	25755940	G	T	1.23	0.36	0.04916	0.576033	0.522994	0
9	45727954	C	A	0.504	0.43	0.04294	0.602189	0.363818	0
11	117965535	A	G	16.3	0.3	0.97753	0.573078	0.962548	2
14	24910233	T	A	10.62	0.27	0.32012	0.643519	0.88191	3
1	47333708	G	A	8.804	0.42	0.95724	0.063197	0.408437	0.185215
4	9176176	A	C	0.115	0.244804	0.05648	0.573888	0.324231	1
3	195346312	C	T	1.146	0.184914	0.09745	0.547309	0.971641	0.185214
16	90095561	C	T	3.284	0.21	0.11039	0.576033	0.486425	1
17	79278768	G	A	4.664	0.28	0.1311	0.074216	0.889712	0.185214
3	195345599	G	A	1.24	0.34495	0.0455	0.602189	0.634288	0.185214
19	54724458	A	G	2.882	0.19	0.05784	0.547309	0.483528	1
5	21884149	G	A	19.01	0.38	0.97437	0.277913	0.869935	0.892754
16	69153034	G	C	14.03	0.57	0.96103	0.702456	0.997334	2
20	17640112	A	G	5.332	0.29	0.09961	0.743671	0.335805	0
10	51464656	G	C	8.948	0.459041	0.90045	0.653264	0.972256	1
2	96593025	C	T	3.087	0.55	0.0782	0.547309	0.996631	1
21	47613570	T	C	13.22	0.29	0.75179	0.724815	0.823038	1
9	33385600	G	A	8.394	0.31	0.46495	0.573078	0.478464	2
1	148741790	C	T	0.041	0.21	0.03428	0.618467	0.456556	0
7	1887362	G	A	0.355	0.19	0.08594	0.578056	0.896975	1.51
11	61644174	G	A	1.728	0.48	0.07067	0.723109	0.284484	2
22	25715772	C	G	0.242	0.17	0.07744	0.083675	0.312566	0.185214
16	29496130	A	G	1.279	0.45	0.04898	0.602189	0.959774	1
9	141070695	G	A	1.037	0.354778	0.88898	0.183335	0.689309	0.185214
2	96617106	A	C	0.001	0.49	0.08508	0.463624	0.32161	0
19	36388619	G	T	9.708	0.52	0.34133	0.608884	0.991865	2
21	39528493	G	A	1.139	0.41	0.12203	0.063197	0.615891	0
2	74392328	C	A	7.546	0.43	0.30148	0.446627	0.582259	-0.661796
19	50473221	T	C	0.003	0.35	0.01787	0.060301	0.16508	0.185214
16	12021486	G	A	2.753	0.23	0.07243	0.618467	0.520708	0.503533
11	6173522	G	A	13.25	0.24	0.13517	0.547309	0.73201	0
6	56470690	G	A	11.96	0.32	0.12367	0.670488	0.420378	0
9	141071420	G	A	0.046	0.414297	0.87562	0.183335	0.680106	0.185214
20	23531143	G	A	3.036	0.26	0.14775	0.063197	0.422199	0.185214
11	85437427	C	A	17.57	0.43	0.87738	0.491513	0.997267	3
7	76631515	G	A	1.308	0.41	0.15481	0.295636	0.688955	0.247757
19	54725992	G	A	0.696	0.11	0.08106	0.547309	0.601683	0
15	90800404	G	A	34	0.19	0.99466	0.59043	0.9996	3
13	42014246	T	C	0.43	0.32	0.04122	0.063197	0.368153	0.185214
10	51465138	C	T	15.94	0.422854	0.95597	0.659464	0.994357	1
20	29632638	C	A	20.4	0.54	0.91043	0.565031	0.911392	2
17	38249536	C	T	27.8	0.58	0.96749	0.679469	0.993071	0
3	183754294	G	C	23.1	0.18	0.91868	0.547309	0.949876	2
16	70011854	T	C	0.043	0.17	0.04542	0.659464	0.948351	1.80962e-49
6	29856402	A	C	5.831	0.42	0.45109	0.217501	0.254263	0.79723
9	46390581	C	G	0.958	0.4	0.05472	0.573888	0.363888	1
7	72469999	G	T	1.011	0.445782	0.88994	0.659464	0.367886	0.185214
1	148262322	A	T	5.213	0.44	0.10756	0.573888	0.186988	1
9	78790197	C	G	1.617	0.377461	0.08509	0.573078	0.190527	2
16	90162579	C	T	3.542	0.28	0.80257	0.060301	0.807332	0.185214
16	78586334	T	A	7.036	0.34	0.25529	0.091713	0.787035	1.30538
15	23407031	T	C	0.001	0.268192	0.03389	0.573888	0.176675	1
10	51225281	C	G	0.183	0.430674	0.92161	0.618467	0.365636	1
14	38276594	A	T	38	0.27	0.98206	0.573888	0.9892	3
11	123964675	C	A	10.07	0.46	0.30614	0.091713	0.637257	0.808001
3	64072820	T	C	5.33	0.24	0.12737	0.135981	0.809876	0.185214
19	58514126	A	G	6.695	0.44	0.45743	0.519653	0.380058	0
1	236343437	G	C	2.342	0.21	0.14467	0.547309	0.235802	2
9	33385602	A	C	0.478	0.35	0.13223	0.573078	0.439981	0
15	28630499	C	G	8.641	0.35	0.952	0.573888	0.974696	1
22	18721555	G	T	0.656	0.44	0.04297	0.573888	0.887719	1
20	30436629	C	T	4.807	0.280527	0.21338	0.596491	0.97235	2
19	50473574	C	T	0.495	0.17	0.06476	0.060301	0.161592	9.40284e-83
1	70144128	C	T	25.8	0.67	0.97759	0.573888	0.980976	3
9	78790192	C	G	2.004	0.38	0.05848	0.573078	0.431473	2
12	9583286	A	G	1.523	0.35	0.66926	0.331037	0.219655	0.185214
14	107131128	G	T	11.45	0.29	0.41218	0.067067	0.874073	6.20083e-38
16	21847717	C	G	3.562	0.45	0.02441	0.659464	0.541978	1
4	7009289	A	G	1.381	0.35	0.1148	0.607795	0.38579	0
16	21902166	C	A	11.76	0.54	0.88343	0.183335	0.579048	0.185214
12	31270149	G	C	3.803	0.31	0.06517	0.125351	0.278331	0.185214
2	241624695	T	C	1.313	0.35748	0.03108	0.547309	0.511951	1
1	1580524	C	T	1.586	0.511139	0.05191	0.743671	0.906134	0
1	24392600	G	A	1.272	0.2	0.05309	0.573888	0.400241	0.820532
16	90161618	C	T	15.07	0.21	0.88351	0.083675	0.942142	0.185214
10	47929856	C	T	10.3	0.43	0.93733	0.618467	0.801177	0
19	15881887	G	A	3.46	0.16	0.0943	0.063197	0.965121	0.185214
16	90162556	G	A	9.161	0.24	0.95395	0.060301	0.63674	0.185214
11	65359910	C	T	3.406	0.52	0.11963	0.503968	0.828192	1
9	34835315	A	G	5.123	0.3	0.17935	0.573888	0.826626	0.807308
5	177457620	C	T	0.489	0.25	0.04826	0.573888	0.576053	0
1	16865623	G	C	0.522	0.394602	0.02641	0.577349	0.261487	0
12	9574042	C	A	10.28	0.47	0.93786	0.331037	0.854266	0.185214
18	76874995	T	C	3.777	0.18	0.04776	0.547309	0.385365	2
2	95513820	C	T	0.034	0.481707	0.02378	0.063197	0.678717	0.185214
17	34499226	C	T	7.988	0.487583	0.93248	0.618467	0.962535	1
5	140536698	G	A	15.63	0.25	0.93298	0.547309	0.798206	0
13	111109179	C	A	5.186	0.21	0.50366	0.578056	0.884296	0.531704
19	54726324	G	C	0.002	0.14	0.02382	0.547309	0.427097	1
12	45567083	C	T	7.206	0.43	0.10136	0.333777	0.838749	0.185214
1	16865744	A	C	0.25	0.347569	0.02158	0.59043	0.120681	1
12	9463773	G	A	10.02	0.2	0.91752	0.283776	0.715534	0.185214
2	96521607	G	C	22.4	0.36	0.93231	0.565031	0.962026	1
5	140615609	G	A	8.659	0.37	0.73413	0.072005	0.789967	0.808001
17	76228088	T	A	1.758	0.53	0.04044	0.606814	0.71243	0
16	15696509	G	A	2.008	0.354056	0.11995	0.463624	0.251835	1
5	766939	G	A	9.443	0.15	0.90464	0.645312	0.830682	1.19776
2	132110828	G	T	2.811	0.2	0.86514	0.59043	0.528003	2
12	24736711	G	A	2.608	0.31	0.11511	0.135981	0.7484	0.185214
13	53151292	A	C	0.028	0.31	0.03136	0.060301	0.364912	0.185214
1	87599377	A	G	11.46	0.26	0.19279	0.576033	0.917716	2
2	241624664	C	A	4.362	0.354983	0.06794	0.547309	0.538031	0
9	115381038	T	C	20.4	0.66	0.99031	0.877121	0.9984	3
5	179280247	C	T	1.335	0.26	0.10505	0.608884	0.473039	1
1	145359169	T	A	13.95	0.27	0.06628	0.618467	0.37444	1
17	3213690	T	C	13.68	0.3	0.67852	0.060301	0.776309	0.808001
5	140615541	G	C	8.608	0.32	0.20244	0.175069	0.714442	0.185214
10	51225299	C	A	0.112	0.42	0.88562	0.653264	0.417481	1
7	72395971	A	G	3.458	0.35	0.03287	0.52208	0.514573	0
15	42302338	A	C	1.962	0.15	0.27824	0.573888	0.450211	0
11	4731519	G	T	13.5	0.2	0.25731	0.547309	0.991139	0.312175
15	42302340	C	G	2.044	0.11	0.24888	0.573888	0.736044	1
10	52504892	T	C	9.853	0.37	0.85578	0.658983	0.283991	1
15	100332827	G	A	2.368	0.32	0.79407	0.083675	0.517632	0.185214
12	9452017	C	A	11.12	0.529637	0.42252	0.343423	0.794037	0.808001
7	142480031	G	A	0.927	0.3	0.1376	0.060301	0.607043	0.185214
10	13735744	G	A	1.471	0.23	0.09319	0.536957	0.532809	2
9	39900571	C	T	4.006	0.474012	0.59819	0.573888	0.668395	0.185214
2	96521220	G	A	0.133	0.34	0.70941	0.601832	0.410667	0
8	19456585	T	C	2.085	0.24	0.14097	0.063197	0.532296	0.333487
2	219941063	G	A	8.058	0.45	0.10197	0.743671	0.741324	0
19	54725995	G	A	2.231	0.14	0.1075	0.547309	0.485293	1.68813
5	140536415	A	T	15.65	0.47	0.99484	0.547309	0.985784	2
15	76074470	A	G	2.69	0.39	0.08625	0.060301	0.354036	0.185214
12	97078909	C	T	0.326	0.14	0.20956	0.573888	0.327797	0
17	18997106	G	T	2.363	0.48086	0.10796	0.618467	0.779475	0
12	13526328	G	T	0.009	0.19	0.1687	0.573888	0.412339	-1.41279
12	9453740	C	T	5.032	0.49	0.77197	0.331037	0.89125	0.185214
19	19552534	C	T	0.42	0.1	0.0212	0.547309	0.667464	0.857972
2	132044797	C	A	15.66	0.37	0.61858	0.618467	0.971426	1
8	105105754	C	T	22	0.356318	0.99647	0.653264	0.999288	2
20	25755694	C	G	11.27	0.321067	0.12122	0.578056	0.318038	1
14	36840934	G	A	2.255	0.3	0.03914	0.078618	0.432197	0.185214
1	39801566	C	G	13.9	0.37	0.13928	0.670488	0.922136	3
15	32777014	G	A	9.918	0.28287	0.26768	0.573888	0.95787	1
9	119903693	G	A	15.67	0.23	0.24457	0.653264	0.821874	0
14	95108170	C	A	1.715	0.47	0.07215	0.060301	0.72278	0.185214
12	133049673	A	G	5.912	0.23	0.05569	0.547309	0.21096	1
16	15696468	A	G	2.142	0.27848	0.08066	0.463624	0.389723	0
20	17639786	T	G	1.052	0.33	0.08969	0.743671	0.327274	3
2	96521138	T	C	0.001	0.43	0.06282	0.565031	0.561223	1
4	190904277	C	A	10.52	0.39	0.95781	0.083675	0.690934	0.185214
11	48387983	T	C	0.001	0.42	0.12137	0.573888	0.21381	1
2	132044787	G	A	14.48	0.36	0.56996	0.618467	0.979234	1
15	82637420	C	T	0.78	0.24	0.12283	0.618467	0.448139	0
12	133049425	G	A	0.592	0.27	0.08692	0.547309	0.800456	1
19	23405522	T	C	8.331	0.19	0.17478	0.702456	0.287017	1
22	41617318	G	C	2.614	0.32	0.10846	0.463624	0.530374	0
15	90807050	G	A	6.241	0.66	0.23623	0.514364	0.967495	3
2	241624694	T	C	0.31	0.409786	0.03817	0.547309	0.22247	0
1	145359109	T	A	0.003	0.32	0.0457	0.618467	0.227387	1
9	78790177	G	C	0.934	0.35	0.06633	0.573078	0.302734	2
6	114292109	C	G	15.19	0.56	0.25075	0.52208	0.967444	2
13	53106822	C	T	9.8	0.53	0.95857	0.063197	0.507814	0.808001
2	132912316	G	A	11.41	0.29	0.31363	0.573888	0.996272	2
4	9388034	T	C	0.002	0.22	0.16808	0.618467	0.595482	1.83322
19	55045032	C	T	5.828	0.27	0.12625	0.573888	0.093128	1
16	29496854	A	G	1.741	0.4	0.06038	0.709663	0.958422	1
3	75475639	T	C	7.464	0.42	0.85351	0.283776	0.23845	0.185214
12	132589423	G	A	4.534	0.459159	0.22672	0.658983	0.632882	0
4	106158509	G	A	29.1	0.56	0.97642	0.547309	0.995595	3
16	90095620	A	G	3.019	0.27	0.06755	0.576033	0.289817	1
22	21576218	G	A	26.6	0.19	0.96433	0.602189	0.998889	2
5	122725999	C	T	21	0.5	0.9698	0.547309	0.969857	2
12	53207919	C	T	12.97	0.52	0.21486	0.547309	0.992806	2
11	114401577	T	C	0.625	0.44	0.08497	0.573888	0.465404	0
12	9451905	G	A	1.653	0.44	0.87137	0.331037	0.469272	0.185214
2	96617113	G	A	11.04	0.5	0.05753	0.463624	0.644657	1
16	29394552	G	T	2.02	0.34	0.04297	0.618467	0.785732	0
15	20644038	G	C	6.967	0.58	0.95372	0.183335	0.718819	0.756202
20	17639876	T	G	5.82	0.36	0.20489	0.743671	0.298621	3
3	161089886	T	C	8.176	0.48	0.31191	0.064036	0.436421	0.188077
2	132044730	G	A	6.699	0.26	0.13255	0.653264	0.977453	1
1	167385323	T	A	13.25	0.64	0.98335	0.083675	0.626055	3
9	127220513	G	C	13.88	0.18	0.89839	0.725225	0.986849	2
19	58513878	A	G	7.787	0.28	0.15881	0.519653	0.709244	1
15	28632820	T	C	1.838	0.41	0.92184	0.573888	0.313513	1
11	48387689	T	C	7.334	0.31	0.36064	0.573888	0.980184	1
7	66773946	G	T	12.03	0.36	0.91667	0.343423	0.893498	0.185214
15	20777700	C	T	2.729	0.626878	0.41672	0.063197	0.334579	0.185214
17	73597544	A	G	22.2	0.48	0.96627	0.691665	0.970966	0
19	23405952	A	G	0.779	0.25	0.09569	0.702456	0.559722	0
3	14105809	A	G	0.002	0.27	0.0641	0.547309	0.153092	1
11	107463159	A	G	15.06	0.38	0.80897	0.608004	0.503967	0
2	132045031	T	C	3.412	0.37	0.06254	0.618467	0.42188	1
6	132695962	G	A	0.083	0.2	0.09841	0.547309	0.344765	0
15	20643901	C	T	9.465	0.67	0.97712	0.277913	0.664546	0.808001
15	20450242	G	T	4.541	0.59	0.13046	0.083675	0.828263	0.185214
16	90095582	T	C	2.893	0.26	0.07155	0.576033	0.402038	1
16	30235187	A	G	1.478	0.34	0.05168	0.573888	0.956182	0
12	56558430	A	C	19.72	0.56	0.93478	0.702456	0.991692	0
10	97116219	C	T	17.85	0.19	0.97032	0.547309	0.880984	0
17	36351981	T	C	15.04	0.82	0.98396	0.743671	0.838629	2
4	3590868	C	A	8.095	0.43	0.25756	0.547309	0.979973	1
5	17491526	C	T	10.79	0.5	0.96247	0.060301	0.733456	0.185214
3	195452668	C	G	0.733	0.26	0.08218	0.547309	0.560681	0
18	49208	G	A	5.881	0.17	0.87876	0.602189	0.711276	1
14	95078737	G	A	4.759	0.65	0.32053	0.573888	0.73977	1.6333
10	5204841	C	T	23.1	0.28	0.96981	0.573888	0.988257	2
19	56662763	A	C	4.966	0.14	0.15319	0.658983	0.860617	1
5	137144191	C	T	7.156	0.62	0.73178	0.063197	0.439342	0.185214
15	20644850	G	A	9.813	0.677589	0.96297	0.183335	0.773574	0.808001
15	76030993	A	G	11.68	0.41	0.09377	0.182457	0.874027	0
15	102292770	C	T	8.815	0.48	0.90315	0.083675	0.811153	0.185214
19	56662762	C	G	6.903	0.14	0.15566	0.658983	0.913336	1
2	96521090	T	C	0.002	0.36	0.09743	0.565031	0.889734	1
16	29393718	A	G	1.112	0.48	0.12618	0.618467	0.326052	0
16	74425826	G	A	4.291	0.13	0.82886	0.573888	0.774216	1
6	7987279	C	T	11.4	0.37	0.90764	0.175069	0.859986	0.647909
9	141070111	T	C	3.932	0.35934	0.85974	0.078618	0.70204	0.185214
5	140615413	C	G	8.865	0.4	0.29677	0.083675	0.545752	0.808001
2	96521512	A	C	8.833	0.36	0.86019	0.565031	0.266842	1
6	142455731	C	A	24.2	0.37	0.99358	0.573888	0.988838	2
16	30236441	A	G	3.179	0.36	0.04236	0.573888	0.269634	0
2	95513821	G	A	0.243	0.56	0.03626	0.063197	0.610137	0.185214
1	41236337	C	T	19.87	0.41	0.92784	0.635938	0.998615	4
8	99045326	G	A	21.6	0.35	0.98105	0.658983	0.993701	2
8	146202846	T	C	11.12	0.24	0.9575	0.231597	0.739296	0.185214
1	47348878	C	T	4.807	0.58	0.96142	0.063197	0.357216	0.185354
16	29495104	A	C	2.023	0.41	0.02655	0.709663	0.933441	1
17	3213868	C	T	1.786	0.22	0.22116	0.060301	0.42561	0.185214
5	135207187	G	A	6.683	0.42	0.26125	0.602189	0.393568	0
4	191002916	C	T	1.37	0.428607	0.16418	0.573888	0.888454	1
17	16734855	C	T	8.852	0.32	0.98262	0.083675	0.549802	0.808001
15	82934638	A	C	0.003	0.42	0.11818	0.618467	0.51757	0
8	26614258	G	A	2.117	0.35	0.03739	0.547309	0.929142	2
11	48387279	G	A	20.3	0.23	0.20133	0.573888	0.980703	1
19	33281944	C	G	0.134	0.16	0.12724	0.602189	0.372273	1
22	32072956	G	A	4.746	0.47	0.19383	0.606814	0.822744	0
14	94928594	C	A	1.08	0.27	0.15032	0.063197	0.691622	1.77258e-41
7	141784326	G	C	18.39	0.46	0.99123	0.547309	0.994278	2
6	153668238	A	G	0.885	0.39	0.02859	0.573888	0.357512	0
11	85436342	C	T	12.61	0.14	0.84711	0.602189	0.393056	0
16	30235619	T	G	2.828	0.43	0.0432	0.618467	0.96399	1
13	28519461	T	C	10.2	0.15	0.87657	0.659464	0.495565	1
1	206760357	T	G	13.85	0.35	0.24944	0.547309	0.965169	2.3618
16	29495901	T	G	3.634	0.47	0.0432	0.602189	0.975528	1
7	141765519	G	A	15.26	0.31	0.98843	0.547309	0.977147	2
9	141071110	A	G	2.156	0.294367	0.90116	0.078618	0.530216	0.185214
15	28630358	A	C	0.56	0.511196	0.85795	0.573888	0.825287	1
22	21838301	C	T	9.119	0.6	0.92305	0.277913	0.683899	0.185214
1	148753320	C	T	2.363	0.34	0.05589	0.573888	0.9914	1
5	668791	C	T	6.119	0.23	0.21961	0.645312	0.498778	0.067404
17	3214098	C	T	7.429	0.26	0.24999	0.060301	0.504092	0.808001
15	30437636	G	A	4.226	0.37	0.1039	0.618467	0.990503	1
16	822892	C	T	11	0.29	0.69593	0.578056	0.981482	2
3	75476735	C	T	8.705	0.27	0.97013	0.12342	0.662038	0.237013
3	195346038	A	C	0.382	0.34	0.05246	0.547309	0.615524	0.185214
21	14469130	A	G	3.184	0.43	0.2917	0.063197	0.594629	0.185214
19	35862414	C	T	14.03	0.36	0.96228	0.573888	0.833563	0
9	141070069	C	T	6.501	0.339047	0.91194	0.078618	0.943754	0.185214
11	123865636	C	T	22	0.37	0.19443	0.063197	0.689807	1
12	39709662	T	C	10.37	0.41	0.18295	0.602189	0.937211	2
8	82539144	G	T	16.07	0.5	0.75754	0.060301	0.817973	0.808001
16	29496643	A	G	3.693	0.43	0.04236	0.709663	0.471112	1
9	141071078	A	G	3.708	0.353051	0.94928	0.078618	0.406667	0.185214
16	29063626	C	A	1.61	0.27	0.12426	0.618467	0.474862	0
8	8088411	A	G	13.35	0.5	0.82861	0.292756	0.863556	0.185214
16	21846216	A	C	0.213	0.48	0.09748	0.659464	0.328994	0
16	64982680	G	A	5.411	0.38	0.14585	0.573888	0.3877	0
9	30832047	G	A	1.087	0.45	0.90345	0.078618	0.586909	0.185214
19	57176820	C	A	4.537	0.24	0.06972	0.074216	0.819827	0.00286289
11	63657701	C	T	6.649	0.193438	0.19784	0.491513	0.301047	0
16	29496695	T	G	1.727	0.46	0.04848	0.709663	0.684149	1
16	30675709	C	T	2.627	0.49	0.15178	0.576033	0.233047	3
15	68119755	G	A	10.71	0.27	0.16928	0.616487	0.94739	1
20	29624070	G	A	24.1	0.58	0.95991	0.601832	0.9967	2
11	49860463	C	T	2.932	0.32	0.04971	0.063197	0.440123	0.185214
11	48387833	T	C	9.805	0.51	0.94612	0.573888	0.0895613	2
3	110612033	C	G	4.698	0.28	0.18157	0.743671	0.944354	1
1	247902654	C	G	7.996	0.22	0.17091	0.573888	0.768591	0
14	107131072	G	A	4.508	0.34	0.8214	0.067067	0.765574	0.185214
1	47364584	C	T	8.408	0.41	0.48009	0.063197	0.749366	0.185214
17	73596691	A	T	0.366	0.16	0.0685	0.547309	0.6204	0
6	96034911	A	G	2.023	0.29	0.21189	0.063197	0.543126	0
9	141070915	C	T	0.892	0.35	0.84038	0.063197	0.660038	0.185214
14	38218168	G	A	9.829	0.29	0.14052	0.573888	0.530842	0
16	21846498	A	G	0.744	0.4	0.05033	0.618467	0.275298	0
1	174517038	A	G	0.157	0.29	0.05165	0.547309	0.106455	2
5	79647607	G	A	10.62	0.23	0.9573	0.283776	0.882975	0.185214
16	31766012	C	T	6.537	0.53	0.84339	0.463624	0.957264	1
16	21846917	T	G	1.398	0.46	0.04729	0.618467	0.70397	1
9	33625185	C	T	19.98	0.38	0.93113	0.292756	0.947836	0.185214
1	249111205	C	T	4.233	0.22	0.1264	0.54472	0.499605	0
12	31284434	T	A	11.09	0.44	0.97602	0.063197	0.850342	0.808001
6	28911802	G	A	5.657	0.1	0.38503	0.606814	0.676699	1
11	85436503	G	A	35	0.25	0.28784	0.602189	0.997093	3
20	30618853	C	T	16.23	0.37	0.92507	0.851219	0.94845	0
6	4735035	T	C	0.002	0.18	0.03129	0.574621	0.204858	1.60428
15	32777138	G	A	1.956	0.22	0.06455	0.573888	0.576739	1
22	18727100	G	C	5.39	0.469481	0.06039	0.573888	0.248345	1
15	20649647	C	T	12.87	0.7	0.97698	0.183335	0.841722	0.808001
14	95109850	G	A	2.923	0.34	0.13566	0.060301	0.865893	0.185214
5	751256	C	A	1.465	0.21664	0.08085	0.602189	0.630191	-3.10269
1	55165942	G	A	4.89	0.22	0.17345	0.573888	0.337862	0.188077
17	15608004	G	A	11.35	0.26	0.96637	0.320204	0.852475	0.492101
12	13526360	C	T	8.268	0.22	0.1494	0.573888	0.478992	0
20	25755895	C	T	12.53	0.47	0.20253	0.576033	0.347913	1
13	64320999	T	C	0.16	0.21	0.03553	0.573888	0.492764	0
10	51464851	G	A	0.292	0.54	0.93298	0.659464	0.565109	0
1	148756607	G	T	0.028	0.480816	0.03583	0.653264	0.50634	1
7	142479988	C	T	5.61	0.33	0.95932	0.060301	0.379574	0.808001
19	56719853	C	A	0.02	0.19	0.17699	0.547309	0.20466	1
17	21731166	C	T	11.84	0.31	0.89624	0.643519	0.533273	0
1	148751738	A	G	0.002	0.41	0.03533	0.618467	0.257838	1
7	92098680	C	T	10.6	0.295595	0.24634	0.602189	0.992153	1
7	76631555	C	T	11.16	0.37	0.83596	0.295636	0.612095	0.25531
22	21576172	G	A	23	0.2	0.96968	0.600433	0.989991	2
2	96521885	C	A	3.199	0.448347	0.19134	0.657636	0.264112	1
10	124365554	C	T	7.492	0.41	0.12173	0.573888	0.941782	1
6	56472659	G	A	11.53	0.38	0.15408	0.65145	0.275413	3
1	145360624	G	A	0.108	0.4	0.05872	0.547309	0.163987	0
16	64697	G	C	11.47	0.46	0.83376	0.709663	0.880884	1
4	5975538	G	A	17.09	0.11	0.19261	0.547309	0.995547	-1.75098
19	16675918	T	C	2.933	0.37	0.14626	0.137589	0.586362	0
6	45296454	A	G	17.86	0.7	0.98707	0.547309	0.892831	0
12	31353379	G	A	4.021	0.63	0.9224	0.060301	0.675793	0.185214
20	17639686	G	T	1.462	0.33	0.21898	0.743671	0.352941	0
19	41532021	G	A	10.16	0.24	0.83411	0.172434	0.975097	0.185214
10	42920884	C	T	9.285	0.27	0.91819	0.547309	0.784994	0.185214
1	145360608	T	A	22.4	0.32	0.09544	0.602189	0.961351	1
11	48387960	T	C	0.001	0.41	0.08051	0.573888	0.1433	1
10	134898361	C	T	6.601	0.2	0.09833	0.072005	0.795389	1
15	23264983	G	A	8.345	0.25	0.91899	0.618467	0.781393	1
10	123297911	T	C	0.725	0.29	0.10583	0.463624	0.447439	0
17	64881075	A	G	1.858	0.17	0.15142	0.573888	0.36707	0
15	102293058	T	G	8.165	0.46	0.90365	0.083675	0.313888	0.185214
15	23259270	A	G	1.497	0.41	0.10692	0.573888	0.289994	0
6	31239688	T	G	0.461	0.12	0.04257	0.519653	0.456674	2.00815
12	97078469	G	T	3.146	0.31	0.19733	0.573888	0.46439	2.68219
7	48887661	G	A	10.33	0.32	0.54775	0.578056	0.915816	1
9	141071154	T	C	1.652	0.267117	0.9484	0.063197	0.62247	0.185214
22	18835523	T	C	0.233	0.13	0.02734	0.573888	0.18181	1
6	31506691	G	A	5.855	0.23	0.20287	0.759307	0.793475	0
9	33662389	A	G	1.193	0.13	0.06856	0.573888	0.0497282	0.185214
11	67564162	A	G	1.496	0.07	0.07484	0.068591	0.343904	0.185214
16	29394948	A	G	1.574	0.479617	0.01983	0.618467	0.269372	0
10	97116205	C	T	19.67	0.28	0.98158	0.547309	0.999333	3
15	100333090	T	C	1.027	0.31	0.04965	0.060301	0.414383	5.57801e-28
19	50475211	T	G	2.926	0.17	0.04669	0.074216	0.375396	0.185214
2	96521455	A	G	0.088	0.27	0.91039	0.565031	0.451447	0
9	46386740	T	C	1.307	0.46	0.06173	0.618467	0.870752	1
2	95522815	A	G	3.097	0.427349	0.04136	0.074216	0.133918	0.185214
2	237150058	C	A	12.5	0.21	0.98824	0.578056	0.94165	2
9	100056271	C	T	12.47	0.48	0.36105	0.696353	0.83658	0
18	1278586	C	A	5.339	0.21	0.09321	0.063197	0.306056	0.185214
4	41628818	A	G	0.011	0.21	0.03954	0.547309	0.228845	0
15	102516466	C	G	15.54	0.58	0.92019	0.292756	0.937747	0.185214
10	49917775	G	A	14.5	0.64	0.74684	0.547309	0.946734	0.771059
10	12292348	G	T	2.577	0.2	0.28485	0.732433	0.983731	0.995742
6	123102396	T	C	2.881	0.24	0.13109	0.547309	0.567825	0
17	34500226	T	C	6.274	0.45	0.92929	0.618467	0.924987	1
14	96137710	C	T	4.892	0.32	0.13166	0.056003	0.514116	0.185214
3	75986695	G	A	2.921	0.5	0.27103	0.601832	0.540851	0
6	56472759	C	T	20.4	0.56	0.94609	0.65145	0.998947	4
12	133050585	A	G	0.002	0.27	0.74166	0.578056	0.0796583	1
20	25755907	C	A	22.3	0.46	0.19449	0.576033	0.943923	2
4	9176248	G	A	1.356	0.276955	0.0784	0.573888	0.896062	1
20	17639857	G	T	0.076	0.31	0.11367	0.743671	0.382426	0
19	22939426	C	G	0.014	0.26	0.03665	0.573888	0.380787	0
10	71391490	G	A	8.821	0.39	0.23526	0.709663	0.517657	0
8	133067315	G	A	8.912	0.47	0.22846	0.547309	0.770867	1
10	134145293	G	T	4.873	0.49	0.1533	0.52208	0.375083	0
1	148262321	G	T	36	0.45	0.10949	0.573888	0.954197	2
7	303255	T	A	0.11	0.274544	0.01876	0.067067	0.0533793	0
10	42965643	T	C	3.548	0.44	0.93557	0.063197	0.669957	2.51935e-30
19	1782989	T	G	0.696	0.4	0.09523	0.498162	0.591055	0.00286289
8	39331042	C	A	0.123	0.24	0.05045	0.060301	0.519059	0.185214
17	78252636	T	C	3.321	0.21	0.12809	0.645312	0.48849	2
9	141070969	A	G	0.144	0.39	0.79627	0.078618	0.0865456	0.185214
2	96525782	T	C	0.002	0.6	0.07784	0.565031	0.151518	0
15	102516150	C	G	14.64	0.725875	0.84871	0.292756	0.876467	0.185214
11	114421909	T	C	2.317	0.54	0.06776	0.547309	0.260675	0
10	5203729	C	T	4.748	0.28	0.10262	0.573888	0.489175	1
5	668488	T	G	0.417	0.19	0.03972	0.576033	0.0464683	2.2265
22	21044631	G	A	1.743	0.15	0.0334	0.547309	0.390726	0.185214
15	82637079	C	T	6.716	0.28	0.79306	0.653264	0.29967	1
17	21730703	G	A	12.87	0.21	0.87408	0.658983	0.679688	1
3	47933138	T	C	10.85	0.49	0.13038	0.618376	0.399038	2
17	71166821	G	A	2.571	0.36	0.18955	0.616094	0.660704	2
13	111109415	C	G	6.403	0.21	0.62729	0.578056	0.981539	0.531704
16	29110458	T	C	14.02	0.34	0.88614	0.175069	0.922743	0.783609
16	21848295	T	G	1.582	0.45	0.0432	0.618467	0.332169	0
20	4713247	G	A	3.775	0.15	0.10228	0.547309	0.598207	1
11	94917569	A	C	1.864	0.3	0.34753	0.547309	0.850036	3
2	96525750	T	A	10.99	0.62	0.07883	0.565031	0.688034	1
19	55048261	C	G	10.93	0.38	0.13956	0.573888	0.835822	1
20	6182286	C	G	1.54	0.32	0.90544	0.292756	0.42644	0.185214
5	140537261	C	T	18.88	0.24	0.97517	0.602189	0.993495	2
5	14652342	G	A	9.721	0.48	0.96281	0.283776	0.914555	0.185214
17	20224794	A	G	0.007	0.47	0.02453	0.070486	0.0779096	0.185214
14	96135924	G	A	2.775	0.35	0.09451	0.091372	0.790057	0.185214
6	56329527	C	A	22.2	0.56	0.99573	0.65145	0.991363	4
8	26614202	G	A	0.658	0.355295	0.05881	0.547309	0.265122	0
6	114292112	G	C	13.29	0.44	0.1879	0.52208	0.936859	2
2	171570468	C	G	9.206	0.28	0.12805	0.608004	0.586056	0
1	85009952	C	T	7.632	0.71	0.89883	0.060301	0.469648	0.808001
2	241624688	A	C	0.075	0.414786	0.03543	0.547309	0.121988	1
3	195346014	T	C	0.346	0.35	0.0511	0.547309	0.962187	0.185214
8	105161027	C	T	18	0.3	0.97043	0.675528	0.773026	0
16	90095558	C	T	3.129	0.2	0.08435	0.576033	0.968845	1
17	3214341	C	T	21.3	0.26	0.99334	0.078125	0.897436	0.808001
19	54726839	C	T	4.977	0.2	0.04213	0.514364	0.884162	1
17	39258211	C	T	12.21	0.26	0.68744	0.491513	0.798301	1
16	29498676	T	C	0.801	0.44	0.04352	0.709663	0.989077	1
15	82935129	C	G	2.619	0.495825	0.06386	0.618467	0.606516	1
4	41631718	C	T	16.97	0.37	0.98772	0.547309	0.998466	2
22	46499079	C	T	4.976	0.24	0.11268	0.576033	0.936223	1
2	69693017	G	C	1.796	0.32	0.34907	0.80507	0.940035	1.3882
2	96593000	A	G	2.868	0.57	0.05993	0.547309	0.925654	1
2	96521334	T	C	0.005	0.28	0.48151	0.565031	0.390565	1
15	82934743	A	C	0.949	0.41	0.05027	0.618467	0.841319	1
9	90388118	G	T	2.873	0.3	0.93469	0.121075	0.478397	0.185214
4	5977658	G	T	7.02	0.24	0.15038	0.547309	0.505408	2
2	96517452	T	C	0.002	0.39889	0.06271	0.565031	0.109444	1
5	147807322	A	G	17.95	0.58	0.97782	0.779548	0.969962	3
5	21482109	G	C	0.764	0.56	0.06951	0.073421	0.319476	0.185214
18	49131	C	T	6.905	0.14	0.92459	0.602189	0.808982	1
19	54726237	C	G	0.212	0.145544	0.04561	0.547309	0.461123	1
17	34499227	G	A	7.979	0.36	0.93434	0.618467	0.99199	2
17	62796759	A	C	6.186	0.61	0.87438	0.070486	0.335821	0.808001
6	96034885	G	A	1.709	0.35	0.1481	0.573888	0.441174	0
19	49559762	C	A	10.71	0.39	0.23035	0.503968	0.822059	2
3	97957559	C	A	12.63	0.31	0.94175	0.063197	0.47338	0.808001
10	81604541	A	C	22.4	0.4	0.7514	0.618467	0.990225	1
10	5204939	G	A	1.347	0.24	0.13906	0.573888	0.149671	0
19	54726241	C	T	3.442	0.16	0.11651	0.547309	0.586199	1
1	161565479	G	A	8.578	0.2	0.21677	0.091713	0.713336	0
22	21322174	G	A	10.93	0.38	0.25453	0.666236	0.978529	2
10	89124859	G	A	13.08	0.21	0.0694	0.618467	0.926035	1
3	14106367	T	A	4.548	0.1	0.06168	0.576033	0.245558	1
20	61143777	G	A	3.383	0.31	0.1612	0.072005	0.697086	0.185214
2	96521744	T	C	0.003	0.4	0.88659	0.565031	0.697841	1
19	50840356	G	A	17.98	0.48	0.97472	0.068591	0.841207	1.41703
4	3590817	T	C	4.04	0.45	0.13203	0.547309	0.732605	1
12	9580293	A	G	8.405	0.4	0.86646	0.331037	0.509337	0.808001
14	107131164	A	C	0.076	0.31	0.06407	0.067067	0.278762	1.45325e-57
7	303149	T	A	1.97	0.310649	0.03153	0.600433	0.190112	1
19	50474224	G	A	3.941	0.16	0.05418	0.060301	0.287621	0.185214
20	26084261	A	G	2.186	0.66	0.80948	0.066767	0.179177	0.185214
15	23261950	A	G	1.526	0.23	0.03332	0.573888	0.376411	0
15	102292829	C	G	8.896	0.4	0.9102	0.083675	0.49325	0.185214
1	247712456	G	A	2.428	0.53	0.14167	0.573888	0.928949	1
7	55753014	C	T	16.17	0.43	0.97593	0.083675	0.889665	0.807861
9	139866247	T	G	2.204	0.16	0.0622	0.578056	0.464457	1
19	15881909	A	G	5.263	0.15	0.31446	0.063197	0.361954	1.19598e-59
17	21201701	C	G	0.139	0.46	0.08213	0.074216	0.403025	0.865012
9	141070116	G	A	8.1	0.355927	0.95703	0.078618	0.945523	0.185214
19	15882884	C	T	19.14	0.28	0.92982	0.063197	0.839754	0.611585
12	9580280	A	G	4.791	0.34	0.88789	0.331037	0.49481	0.185214
15	23444016	G	A	8.715	0.45	0.89137	0.078618	0.68986	0.185214
19	58762724	A	C	2.95	0.47	0.12177	0.575934	0.529545	0
5	668261	G	A	0.804	0.18	0.08186	0.645312	0.658582	-2.43126
3	101295507	A	G	18.75	0.33	0.90608	0.283776	0.73082	0.50944
5	70516189	T	G	9.249	0.62	0.93164	0.277913	0.661804	0.185214
4	1244567	A	G	4.002	0.23	0.17156	0.209056	0.522576	0.185214
15	102513547	C	T	16.58	0.61	0.87844	0.283776	0.932129	0.185214
19	11796135	C	T	7.608	0.46	0.88787	0.060301	0.622446	0.969106
17	21730847	G	T	0.629	0.24	0.88565	0.602189	0.425119	1
12	70352300	C	T	18.2	0.37	0.95444	0.618467	0.999007	2
19	33304649	G	A	7.018	0.26	0.89941	0.602189	0.712375	0
11	55747409	G	A	2.076	0.34	0.07956	0.060301	0.485528	0.185214
7	158415196	T	C	11.79	0.5	0.94579	0.125526	0.494147	5.76785e-10
12	10659128	G	A	6.087	0.16	0.90985	0.659464	0.292845	0
9	139864341	A	G	0.528	0.17	0.03867	0.578056	0.54098	1
2	96521640	C	T	12.02	0.43	0.37087	0.657636	0.140301	1
19	12221164	C	T	10.02	0.62	0.74226	0.702456	0.843632	0
19	49561436	C	T	13.84	0.49	0.49261	0.606884	0.930117	2
12	97052014	C	A	24.5	0.37	0.96035	0.573888	0.997688	2
1	149676155	G	T	3.068	0.279722	0.03551	0.577349	0.753953	1
4	41633322	C	A	21.3	0.18	0.95892	0.547309	0.522174	2
20	30513735	C	T	17.64	0.16	0.95037	0.618376	0.628674	0
1	149676532	A	G	1.385	0.43	0.05081	0.566861	0.30579	1
6	51275018	G	A	10.73	0.55	0.9469	0.277913	0.852984	0.185214
21	46528693	A	T	3.582	0.36	0.09869	0.547309	0.456953	1
22	21829555	T	G	15.54	0.457871	0.90437	0.277913	0.847912	0.808001
6	13470336	A	C	0.404	0.38	0.11864	0.491513	0.617686	0
2	96517905	A	T	0.35	0.22	0.0918	0.565031	0.288387	1
9	117092701	C	A	0.282	0.16	0.07016	0.547309	0.536039	2
2	96525723	C	T	10.11	0.54	0.84104	0.565031	0.669139	1
8	23147564	G	A	14.96	0.42	0.86218	0.709663	0.924836	-2.1771
16	18452429	A	C	1.621	0.49	0.04	0.659464	0.850514	1
1	116915996	A	C	18.19	0.59	0.22171	0.52208	0.853072	1
16	824291	G	A	5.36	0.15	0.18457	0.578056	0.984051	1
21	43166026	G	C	10.96	0.27	0.20439	0.596394	0.861152	2
2	33952577	G	A	11.44	0.31	0.96074	0.060301	0.911112	0.185214
2	96517893	T	C	0.025	0.22	0.09395	0.565031	0.325203	1
19	55048253	G	A	8.522	0.41	0.10035	0.573888	0.955218	1
5	140615015	T	C	14.79	0.42	0.40742	0.060301	0.652169	0.185243
2	167133597	G	A	26.3	0.3	0.9592	0.653264	0.992396	0
12	9451897	A	C	0.669	0.42	0.1538	0.331037	0.584398	0.185214
3	14106354	C	T	7.675	0.17	0.68486	0.578056	0.406744	0
11	49860568	A	G	0.843	0.31	0.26177	0.063197	0.518248	0.185214
16	1470199	G	A	5.557	0.45	0.09207	0.672317	0.76413	0
4	190904383	G	A	3.985	0.46	0.91602	0.083675	0.56714	0.185214
11	89806438	T	C	0.497	0.19	0.04985	0.573888	0.587042	0
20	58606327	C	A	6.92	0.3	0.07872	0.618467	0.570007	0
22	20715953	A	T	0.039	0.34	0.03989	0.060301	0.257589	0.188077
16	823284	C	T	9.406	0.19	0.19667	0.576033	0.994085	2
3	155755327	G	A	0.564	0.54	0.19183	0.060301	0.238146	0.51579
2	96521486	G	A	0.006	0.34	0.06858	0.565031	0.0852222	1
2	905914	G	C	0.032	0.26	0.19112	0.135981	0.410973	0.185214
16	90095729	C	T	2.732	0.23	0.10505	0.576033	0.812655	1
12	133049616	A	G	0.151	0.249983	0.24577	0.547309	0.125377	1
10	79626778	A	T	4.954	0.41	0.17686	0.491513	0.799	0
8	7154982	C	A	3.252	0.28	0.05357	0.063197	0.413851	0.185214
11	48387825	T	G	0.203	0.44	0.93729	0.573888	0.28989	1
16	67686	T	C	9.729	0.37	0.84871	0.696353	0.663638	1
1	171121173	A	G	0.002	0.36	0.16858	0.573888	0.355865	1
1	148012533	T	G	0.002	0.49	0.03781	0.618467	0.0593648	1
17	39257946	G	C	0.222	0.17	0.08416	0.578056	0.466901	0
2	96525794	C	A	0.001	0.6	0.0503	0.657636	0.104475	1
8	7154917	A	C	0.709	0.22	0.03043	0.063197	0.24431	0.185214
16	21848004	A	G	1.902	0.38	0.05025	0.573888	0.571943	1
3	128292497	C	T	11.39	0.15	0.19733	0.547309	0.853507	2
18	49147	G	A	7.15	0.17	0.85597	0.602189	0.78364	1
5	140615131	G	T	11.81	0.32	0.2415	0.083675	0.799828	0.185214
5	179079222	C	T	2.367	0.2	0.06906	0.667716	0.393694	0
17	74222490	A	G	11.21	0.25	0.10095	0.059349	0.79399	0.333487
22	18727115	G	T	0.072	0.457481	0.02223	0.573888	0.177667	1
20	25755702	T	C	0.003	0.350985	0.12947	0.578056	0.150457	1
22	31685259	C	T	16.86	0.22	0.24411	0.563428	0.980952	2
4	140811069	C	G	14.19	0.1	0.91094	0.547309	0.991609	1
16	21854860	G	A	0.112	0.63	0.04288	0.659464	0.9926	1
20	25755913	C	A	22.7	0.47	0.17869	0.576033	0.943607	2
5	174422444	G	A	9.381	0.45	0.0667	0.063197	0.876094	0.185214
10	112696659	A	G	8.639	0.37	0.84892	0.068591	0.347649	0.372955
6	133048010	C	T	5.373	0.27	0.1754	0.547309	0.561319	2
5	140242751	G	A	9.868	0.18	0.94815	0.489635	0.864713	0
15	82934936	A	C	2.107	0.4	0.79471	0.573888	0.663225	1
11	48387679	A	G	0.381	0.31	0.33362	0.573888	0.666162	0
16	824957	C	T	10.05	0.172733	0.61044	0.578056	0.993918	1
12	45567852	C	T	9.4	0.35	0.20987	0.277913	0.761628	0.185214
15	100332648	C	T	6.82	0.4	0.91193	0.067067	0.588557	0.185214
14	107131089	A	G	1.582	0.33	0.19602	0.067067	0.946128	1.33787e-25
12	133050265	A	G	0.036	0.196009	0.72004	0.547309	0.187042	1
15	82637294	T	C	0.003	0.27	0.05144	0.573888	0.257783	0
3	185649584	C	G	21.5	0.64	0.96458	0.698795	0.972529	4
7	37960275	C	A	10.54	0.55	0.27787	0.503968	0.887672	1
1	241756678	C	A	1.047	0.51	0.15794	0.602189	0.391754	0
17	21731124	C	A	14.15	0.32	0.95566	0.643519	0.561578	0
12	97043781	G	A	7.388	0.22	0.96497	0.573888	0.377422	0
3	14106332	G	C	2.36	0.16	0.85299	0.576033	0.169399	-1.04251
20	31477139	G	A	7.951	0.33	0.96877	0.547309	0.507151	0
10	36811916	G	A	18.17	0.13	0.93828	0.709663	0.997818	1
15	82637460	T	C	0.008	0.26	0.8656	0.618467	0.246389	1
10	89120661	G	C	1.088	0.15	0.05855	0.618467	0.220711	1
9	139877807	C	A	7.172	0.6	0.0721	0.074216	0.847271	1.47462
19	54656934	C	T	6.138	0.36	0.16301	0.572659	0.990731	3
2	33952679	C	T	1.486	0.34	0.08468	0.060301	0.85511	0.185214
15	102292723	A	C	0.662	0.45	0.88291	0.060301	0.134682	0.185214
2	96551974	A	G	0.002	0.461144	0.0258	0.547309	0.0304079	1
16	74425461	A	G	4.339	0.42	0.05108	0.573888	0.423216	1
4	191002957	G	A	0.262	0.412804	0.04017	0.573888	0.866488	1
9	141070139	C	T	4.726	0.414394	0.86416	0.078618	0.693508	0.185214
19	3728405	C	T	3.966	0.18	0.12333	0.607795	0.269629	2
9	90388119	G	A	9.248	0.39	0.98606	0.121075	0.521113	0.808001
7	26576535	T	C	0.002	0.31	0.07376	0.573888	0.222257	1
1	210804430	G	A	1.625	0.17	0.07579	0.573888	0.895891	2
16	15225056	A	G	5.731	0.37	0.61667	0.743671	0.29877	1.33093
22	42971987	T	C	14.86	0.37	0.87469	0.320204	0.606576	0.808001
12	31307356	T	C	10.62	0.48	0.9531	0.060301	0.821471	0.808001
6	124603390	A	G	2.139	0.24	0.1042	0.573888	0.310701	2
20	62474816	G	A	2.97	0.28	0.09468	0.578056	0.889726	1
12	9571742	C	G	15.6	0.48	0.9664	0.331037	0.754076	0.808001
10	36812831	A	G	17.68	0.27	0.96414	0.709663	0.970669	0
2	74392328	C	T	7.376	0.43	0.21503	0.446627	0.512859	0
6	41168752	C	T	12.65	0.67	0.91291	0.076284	0.61866	2.38288
9	46386902	G	A	0.027	0.22	0.03048	0.618467	0.910291	1
19	50474214	A	G	0.128	0.23	0.03586	0.060301	0.0909693	0.185214
22	50014239	C	T	3.745	0.36	0.05979	0.547309	0.518715	1
5	33751454	A	T	1.506	0.2	0.21372	0.602189	0.909627	2
10	30653864	A	C	3.401	0.2	0.13214	0.596394	0.515538	0
9	78790182	G	C	0.867	0.36	0.06838	0.573078	0.341124	2
16	29096538	C	T	16.28	0.59	0.92517	0.183335	0.847163	0.807536
19	24010315	G	A	16.04	0.27	0.96854	0.709663	0.998942	2
9	141070125	C	T	7.543	0.353427	0.95613	0.078618	0.918972	0.185214
2	95522786	T	C	0.087	0.41	0.04435	0.072005	0.117133	0.185214
13	44734696	A	G	4.389	0.34	0.11095	0.060301	0.609498	0.188077
1	2121528	A	T	0.329	0.42	0.1701	0.504199	0.190856	0
2	96521609	T	C	19.24	0.44	0.89972	0.565031	0.844035	1
1	145360574	G	C	10.39	0.34	0.05266	0.602189	0.811313	1
21	47613623	C	T	2.726	0.28	0.12365	0.724815	0.537134	0
6	29230718	A	C	8.676	0.23	0.36621	0.063197	0.866269	0.808001
6	160913983	G	A	0.95	0.36	0.05995	0.083675	0.666502	0.185214
7	156903223	C	T	0.48	0.45	0.0827	0.573078	0.586656	1
10	52419481	G	C	2.28	0.2	0.77136	0.060301	0.181443	0.185214
2	132905758	C	T	1.887	0.33	0.06138	0.573888	0.552747	0
3	33686053	T	A	2.56	0.48	0.2324	0.091713	0.837082	2
15	20777971	G	A	0.005	0.62	0.02667	0.078618	0.711699	0.185214
11	48387275	T	C	23.9	0.37	0.97952	0.573888	0.998041	2
6	163612012	C	A	5.768	0.15	0.21259	0.547309	0.936626	1
11	55259581	G	A	3.688	0.38	0.14055	0.063197	0.690494	0.185214
9	67786101	C	T	2.076	0.43	0.04926	0.618467	0.520644	1
16	3583135	A	C	18.33	0.41	0.9698	0.602189	0.993477	3
20	17639668	A	G	0.183	0.4	0.10117	0.743671	0.19835	0
13	64321010	A	G	0.198	0.19	0.02755	0.573888	0.516579	1
15	90800449	C	T	22.7	0.16	0.97348	0.59043	0.990467	3
11	2018089	G	A	4.096	0.431118	0.13014	0.072005	0.914905	0.185214
7	72420448	C	G	3.715	0.49	0.26124	0.320204	0.578114	0.865012
6	26422353	C	T	5.176	0.34	0.15369	0.151085	0.686767	0.185214
20	25755751	G	A	8.102	0.387278	0.07313	0.578056	0.376157	1
9	136215642	T	C	1.943	0.24	0.07152	0.600757	0.508807	0
9	127237731	T	C	16.26	0.59	0.9453	0.505578	0.998307	2
12	132589649	C	T	8.943	0.46	0.91309	0.608884	0.369909	1
4	5528028	C	T	8.125	0.4	0.06116	0.602189	0.370099	0
15	23441628	C	G	2.463	0.6	0.33714	0.063197	0.323108	0.185214
1	145328389	C	G	0.028	0.303548	0.0583	0.547309	0.509541	1
16	79245961	T	C	3.617	0.32	0.21249	0.675528	0.682466	2
12	68947121	T	C	7.316	0.41	0.93284	0.078618	0.846787	0.185214
12	133050247	G	T	0.352	0.17	0.88655	0.547309	0.679869	1
22	21570340	G	A	23.8	0.16	0.94204	0.602189	0.997513	1
19	53787609	A	G	1.058	0.21	0.09334	0.083675	0.491273	0.185214
2	96604606	C	A	5.277	0.38	0.09186	0.547309	0.961242	1
16	70016573	G	A	2.939	0.25	0.04695	0.659464	0.472432	0.185214
11	5142134	C	T	0.911	0.25	0.09504	0.063197	0.478006	0.185214
1	87104586	G	A	4.035	0.53	0.16861	0.060301	0.717486	0.185214
9	141071552	C	T	6.829	0.330536	0.95638	0.078618	0.592114	0.185214
15	102515299	G	A	15.14	0.57	0.96703	0.283776	0.926643	0.185214
7	142482291	G	A	1.112	0.25	0.15093	0.060301	0.377113	0.185214
16	29496489	A	G	3.624	0.46	0.04236	0.709663	0.344073	0
3	14105923	C	T	9.428	0.24	0.18168	0.547309	0.539567	1
4	140811075	C	T	8.103	0.13	0.88709	0.547309	0.433407	0
11	48999520	T	A	4.248	0.18	0.05938	0.063197	0.202365	3.54872e-31
6	15546294	C	T	0.641	0.08	0.11031	0.48864	0.890506	2
16	21847645	A	G	2.986	0.42	0.04236	0.653264	0.32437	1
10	112696573	T	C	5.64	0.36	0.82668	0.068591	0.149799	0.372955
9	119160776	G	A	1.248	0.37	0.13576	0.573888	0.805535	1
7	38725484	G	A	21.6	0.16	0.13042	0.547309	0.992388	1
10	6370191	T	C	4.447	0.33	0.1185	0.602189	0.408349	0.185214
17	64881085	G	A	0.436	0.25	0.15112	0.573888	0.840351	2
11	5142035	G	A	5.521	0.22	0.15496	0.063197	0.733848	0.185214
8	104212925	A	C	0.956	0.25	0.08617	0.573888	0.957097	1
8	39250888	A	G	2.728	0.32	0.39605	0.063197	0.751761	0.808001
4	191002977	G	A	5.398	0.4	0.6871	0.573888	0.88577	0
1	148262330	C	T	11.03	0.47	0.08983	0.573888	0.141009	1
6	56471005	A	G	11.51	0.26	0.18995	0.65145	0.397646	0
16	30235745	T	G	0.825	0.4	0.04749	0.618467	0.951958	1
20	17639846	T	G	5.535	0.34	0.17776	0.743671	0.245226	3
22	16157762	C	T	1.553	0.42	0.09029	0.573888	0.848878	0
6	133055633	G	C	7.431	0.14	0.22164	0.573888	0.958322	2
12	133049516	T	G	0.001	0.19	0.24677	0.547309	0.0510161	1
7	142480063	C	A	10.46	0.32	0.96508	0.060301	0.535721	0.808001
8	55576286	C	T	15.53	0.65	0.98267	0.063197	0.741926	0.808001
1	145367719	G	A	16.56	0.42	0.11935	0.602189	0.678732	1
16	29495487	A	G	3.43	0.44	0.04236	0.602189	0.378884	0
2	242688292	C	T	3.141	0.34	0.06595	0.576033	0.717225	1
7	142482229	T	A	15.5	0.33	0.90708	0.060301	0.799552	0.185214
1	236343344	G	A	3.836	0.33	0.1866	0.547309	0.969209	2
19	52097461	A	C	4.391	0.19	0.09872	0.503968	0.591298	1
12	31267847	C	T	5.764	0.36	0.73273	0.083675	0.817153	0.185214
1	155186729	T	C	10.4	0.47	0.95017	0.271638	0.258303	0.185214
11	48387946	G	T	0.001	0.37	0.12107	0.573888	0.157682	1
6	133055452	G	C	23.1	0.25	0.93964	0.573888	0.995555	3
2	241889878	A	G	13.47	0.15	0.93931	0.573078	0.917337	2
3	110612031	G	A	0.798	0.26	0.08086	0.743671	0.780395	1
20	2797015	G	A	1.959	0.66	0.15461	0.578056	0.403298	-1.55648
7	142482242	G	A	9.374	0.27	0.95006	0.060301	0.640114	0.808001
12	9453702	C	T	14.27	0.530524	0.98226	0.231597	0.89775	0.808001
14	50065444	G	A	5.312	0.35	0.63262	0.519653	0.869434	1
19	55049184	G	A	0.002	0.22	0.04934	0.573888	0.427066	1
6	12933866	C	T	2.742	0.4	0.1146	0.547309	0.308393	0.206658
14	48143868	G	A	16.09	0.28	0.8063	0.606884	0.969343	0
16	79245820	G	T	7.485	0.37	0.28483	0.675528	0.780208	2
7	102220173	A	C	1.021	0.46	0.07233	0.618467	0.710195	0.280326
11	65004309	C	T	2.977	0.38	0.08043	0.121787	0.784168	0.185214
22	18835163	G	A	2.368	0.12	0.05776	0.573888	0.822203	1
14	76965196	C	T	7.242	0.24	0.22839	0.602189	0.987123	2
20	25755770	C	G	0.008	0.40858	0.06577	0.576033	0.255399	1
9	141070687	C	T	4.248	0.341646	0.91173	0.078618	0.578331	0.185214
21	14468951	T	C	3.784	0.44	0.95408	0.063197	0.507105	0.185214
11	123964464	T	G	8.55	0.5	0.29228	0.091713	0.616912	0.808001
16	29393697	T	G	1.498	0.55	0.12288	0.618467	0.814152	1
7	142481888	T	C	12.43	0.37051	0.91043	0.060301	0.782989	0.185214
7	92098868	G	C	9.55	0.17	0.39213	0.602189	0.939892	0
1	148004781	T	C	2.33	0.41	0.06024	0.602189	0.384444	1
1	35320955	G	A	10.07	0.6	0.08974	0.343423	0.82254	0.00286289
1	233785716	T	G	2.823	0.22	0.06131	0.547309	0.55979	0
16	15696466	A	G	0.198	0.272092	0.01659	0.463624	0.254934	1
10	42922659	G	A	15.42	0.23	0.96952	0.547309	0.958833	0.805707
16	29394313	A	G	4.596	0.36	0.04236	0.653264	0.641248	1
5	112228765	C	A	6.688	0.17	0.10101	0.54472	0.741552	1
1	148004786	T	C	0.014	0.41	0.02609	0.602189	0.127078	1
5	112227799	A	G	13.19	0.34	0.86835	0.709663	0.860077	2
1	47366085	C	T	2.272	0.6	0.09832	0.063197	0.440205	0.185214
4	191003220	C	G	2.654	0.41	0.08498	0.48864	0.543928	0
6	56469029	C	G	17.05	0.36	0.91781	0.670488	0.95826	3
10	51465650	C	T	13.34	0.46	0.89132	0.653264	0.944843	1
2	96521438	A	G	0.001	0.26	0.38535	0.565031	0.39235	1
16	74425961	G	A	0.888	0.259823	0.81996	0.573888	0.306971	1
15	102515335	C	G	14.69	0.54	0.9261	0.283776	0.864017	0.185214
19	54726833	T	C	9.354	0.18	0.09917	0.514364	0.953725	1
10	128191368	T	C	3.524	0.26	0.07636	0.547309	0.695812	1
19	54724457	T	C	0.078	0.18	0.05042	0.547309	0.620763	1
2	96521689	C	T	9.619	0.41	0.87126	0.565031	0.440931	0
16	29395403	T	G	2.274	0.47	0.09844	0.659464	0.787669	1
15	102516373	C	T	12.82	0.58	0.78529	0.292756	0.880848	0.185214
17	21731270	T	C	13.98	0.38	0.89776	0.643519	0.62252	1
10	30653858	A	C	2.584	0.2	0.08956	0.596394	0.51953	0
16	21847148	T	G	4.304	0.45	0.0515	0.618467	0.693548	1
7	98937609	A	G	2.213	0.42	0.05888	0.463624	0.426026	3
11	50246855	C	T	16.47	0.54	0.97179	0.078618	0.780896	0.805707
15	90800375	C	G	12.81	0.18	0.99425	0.590023	0.812358	0
10	89124767	C	G	19.96	0.49	0.07561	0.618467	0.995612	1
18	32887692	C	T	3.045	0.32	0.15931	0.331037	0.367927	0.185214
5	667972	G	A	0.016	0.15	0.03256	0.463624	0.733715	-0.552269
21	14469652	G	T	0.518	0.46	0.06323	0.063197	0.428701	0.185214
7	92098682	G	A	6.681	0.295595	0.14555	0.602189	0.922831	0
12	8386973	C	T	5.872	0.39	0.10092	0.121787	0.934368	0.185214
8	146203346	T	G	4.101	0.19	0.19152	0.343423	0.0832585	0.185214
16	12021346	C	T	4.039	0.17	0.10049	0.573888	0.90001	-1.55363
16	21846768	A	G	1.577	0.41	0.04236	0.618467	0.342576	0
3	14105927	G	C	1.52	0.21	0.2672	0.547309	0.234214	1
10	51464844	C	T	23.1	0.49	0.9536	0.659464	0.997529	1
14	105302878	A	G	13.94	0.38	0.95735	0.083675	0.723528	0.185214
18	48104	T	C	1.045	0.4	0.72725	0.602189	0.190285	0
9	139635442	C	T	9.714	0.23	0.32594	0.578056	0.721248	0
19	24010322	G	A	10.81	0.27	0.90612	0.709663	0.985559	2
9	141070950	A	G	5.774	0.365929	0.94928	0.078618	0.675154	0.185214
16	29495837	A	G	4.029	0.46	0.04236	0.709663	0.977435	1
16	29394681	A	G	4.312	0.32	0.0429	0.653264	0.301953	0
2	96521608	G	A	0.169	0.42	0.88258	0.565031	0.284424	0
18	19994773	A	G	0.828	0.31	0.07468	0.573888	0.713967	0
16	29495140	A	C	1.061	0.41	0.05113	0.709663	0.985616	1
16	70055798	G	A	14.33	0.72	0.95321	0.343423	0.932	0.808001
11	48387335	C	A	25.7	0.39	0.29087	0.573888	0.990028	2
17	3214529	G	A	6.788	0.22	0.42772	0.060301	0.700313	0.185214
16	74425769	C	T	22.5	0.25	0.89385	0.573888	0.996095	1
20	25755892	T	C	0.002	0.46	0.20647	0.576033	0.249549	1
1	178514898	G	A	1.639	0.41	0.10032	0.602189	0.556662	1
10	860576	C	T	5.859	0.4	0.10709	0.463624	0.480604	0
2	33952673	C	T	8.5	0.34	0.90337	0.060301	0.860507	0.185214
16	88620345	A	C	1.646	0.22	0.0728	0.576033	0.386881	0.185214
1	148004732	A	C	0.251	0.43	0.01968	0.658983	0.509498	1
7	37960355	G	A	10.4	0.38	0.18045	0.674405	0.844029	0
21	10862826	G	A	23.6	0.48	0.95515	0.081037	0.975085	8.92174e-24
1	57499062	C	T	13.96	0.28	0.1113	0.602189	0.581247	0
12	57111539	G	A	0.629	0.26	0.13393	0.696353	0.307337	3
16	30236327	A	G	2.733	0.33	0.04236	0.573888	0.410248	0
19	53884775	C	A	0.048	0.2	0.03739	0.575934	0.446553	1
11	4825648	A	T	7.376	0.38	0.23406	0.573888	0.968278	1
19	51670809	G	A	3.871	0.31	0.11575	0.060301	0.98778	0.185214
2	137639872	T	G	23.1	0.44	0.98241	0.658983	0.982107	2
9	141069883	G	A	3.519	0.334099	0.93148	0.078618	0.591268	0.185214
7	32956881	A	G	0.178	0.395506	0.05598	0.121075	0.271556	0.188077
14	20697600	T	G	8.897	0.16	0.24392	0.063197	0.985594	0.185214
20	34147311	C	A	13.52	0.42	0.98557	0.072005	0.577571	0.808001
17	26940071	A	G	14.02	0.612864	0.17923	0.575934	0.794393	0
9	127215319	C	T	19.08	0.17	0.32045	0.61531	0.970989	1
15	52630015	G	C	19.88	0.68	0.98648	0.527494	0.998582	3
11	85435306	G	A	32	0.26	0.30901	0.602189	0.994202	3
13	101833649	C	T	1.328	0.28	0.05666	0.573888	0.83946	2
1	144811836	G	A	0.961	0.24	0.49322	0.685742	0.547016	0
5	140536313	G	A	2.174	0.26	0.11497	0.578056	0.832396	1
1	148011763	C	T	0.976	0.52	0.10322	0.573888	0.464336	0
16	90095597	T	C	1.455	0.25	0.02951	0.576033	0.233629	1
1	93646433	T	C	10.4	0.44	0.43066	0.519653	0.667674	0.523038
5	38821204	T	C	3.808	0.14	0.04781	0.547309	0.459964	0
6	25097322	T	A	16.92	0.34	0.9909	0.547309	0.994061	0.808001
5	112228667	G	A	7.948	0.14	0.25965	0.670488	0.894797	1
19	54726628	C	T	2.097	0.144091	0.10808	0.602189	0.960303	1
5	21482111	A	G	4.005	0.51	0.02282	0.073421	0.263505	0.185214
3	64072744	A	G	0.191	0.22	0.11987	0.134018	0.494317	0.185214
2	130900188	A	G	1.948	0.2	0.07632	0.59043	0.524106	1
20	30513710	G	T	21.5	0.29	0.99205	0.618376	0.998401	3
10	46970531	G	T	8.057	0.45	0.24917	0.606814	0.677268	0
15	20450242	G	C	3.587	0.59	0.12369	0.083675	0.709496	0.185214
6	10430465	C	T	20.8	0.42	0.89595	0.060301	0.875885	1.42002
6	31239697	C	A	9.138	0.16	0.10822	0.519653	0.956646	1.0267
16	66940	G	A	14.94	0.37	0.90031	0.643519	0.899652	0
3	75475709	T	C	6.984	0.41	0.29014	0.121787	0.599332	0.185214
16	30236029	C	G	3.213	0.35	0.04352	0.659464	0.978939	1
7	48887797	T	C	1.151	0.13	0.0352	0.578056	0.068991	0
16	29495562	A	C	1.467	0.44	0.04351	0.602189	0.427501	0
6	29069299	C	T	35	0.16	0.11902	0.573888	0.991334	2
2	132912341	C	T	11.01	0.23	0.31797	0.063197	0.851515	2
14	36840835	G	A	0.766	0.32	0.08255	0.078618	0.501728	0.185214
9	85670573	C	T	2.392	0.18	0.11313	0.547309	0.456746	1
5	156277784	C	T	10.77	0.39	0.96457	0.277913	0.769149	0.185214
2	96563206	A	T	0.002	0.42	0.07478	0.573888	0.255429	0
1	202794857	C	A	23	0.18	0.98504	0.602189	0.991118	2
6	24205492	C	T	2.34	0.42	0.19849	0.600433	0.931109	2
1	149676401	A	G	6.264	0.44	0.03039	0.408882	0.633633	1
16	21847810	T	G	2.729	0.46	0.05171	0.653264	0.619955	1
2	132110862	G	C	1.127	0.21	0.18105	0.59043	0.505994	0
14	91233244	T	C	4.681	0.26	0.63853	0.059349	0.453051	0.333008
15	23264144	A	G	0.432	0.18	0.03721	0.618467	0.199261	1
17	50212286	C	T	4.638	0.23	0.1475	0.68496	0.908361	2
9	45727257	A	C	0.604	0.14	0.05734	0.658983	0.333789	1
12	57112395	T	G	1.699	0.26	0.12978	0.536957	0.33012	0
9	33385603	C	T	2.275	0.36	0.20943	0.573078	0.243345	2
7	142760493	G	A	0.982	0.43	0.07098	0.063197	0.208604	0.185214
19	54726816	A	T	3.398	0.12	0.0329	0.514364	0.853094	0
10	3183827	G	A	7.9	0.43	0.24102	0.564498	0.835633	0
12	133050602	A	G	0.001	0.29	0.049	0.578056	0.0240576	1
11	55747217	C	T	2.528	0.28	0.09297	0.060301	0.287116	0.185214
15	42032233	A	T	19.33	0.44	0.99247	0.702456	0.987564	0
16	15696474	A	C	1.614	0.27848	0.08657	0.463624	0.42779	0
22	18835365	T	G	2.149	0.13	0.01999	0.573888	0.445248	0.910985
21	14468783	C	T	3.675	0.49	0.80429	0.063197	0.438114	0.185214
3	187897059	G	A	0.692	0.18	0.10087	0.596394	0.716323	1
20	24930085	G	A	5.024	0.36	0.1455	0.573888	0.991085	1
6	133055789	G	T	0.611	0.24	0.37032	0.573888	0.817572	2
17	16734727	C	A	9.696	0.39	0.97958	0.060301	0.631134	0.808001
2	176995522	A	T	20.5	0.4	0.89245	0.596491	0.907634	4
16	70010463	A	C	0.258	0.24	0.04933	0.659464	0.288171	0.185214
7	888226	A	G	2.346	0.343548	0.36326	0.723109	0.895346	1
15	20649560	C	T	10.54	0.71	0.97698	0.183335	0.737846	0.808001
17	34499299	A	C	1.713	0.36	0.15946	0.618467	0.311645	1
1	146244609	C	T	2.062	0.53	0.0845	0.618467	0.911514	0.185214
7	26578124	C	T	0.045	0.08	0.19353	0.547309	0.350492	1
16	29495636	T	G	1.312	0.48	0.05639	0.602189	0.707011	1
22	21832202	G	A	8.361	0.46	0.91465	0.277913	0.839225	0.185214
19	3728407	G	A	2.214	0.16	0.14825	0.607795	0.578701	2
16	29495446	A	G	3.433	0.47	0.04236	0.602189	0.968159	1
3	155744364	A	G	11.21	0.36	0.89269	0.060301	0.762202	0.185214
1	45111052	G	A	13.24	0.187913	0.12612	0.486962	0.643985	2
2	21365706	C	G	16.14	0.49	0.95711	0.573888	0.987169	2
16	29376056	T	A	12.46	0.43	0.95755	0.618467	0.990028	0.185216
1	150779775	G	A	6.384	0.22	0.18165	0.491513	0.523407	0
15	102292811	C	A	11.05	0.44	0.88363	0.083675	0.676979	0.185214
4	190904578	C	A	16.68	0.27	0.92487	0.083675	0.883021	0.185214
2	132044975	C	T	0.756	0.38	0.03919	0.618467	0.431722	0
16	33013664	C	T	5.996	0.46	0.57069	0.063197	0.513587	1.26976e-28
7	92099637	G	A	11.11	0.31	0.33989	0.547309	0.992768	1
12	11420444	C	G	0.002	0.27	0.04478	0.078618	0.116813	1
2	71620563	A	G	9.857	0.28	0.20122	0.702456	0.258154	0.547112
10	89124914	T	A	22.5	0.23	0.10039	0.618467	0.988241	1
16	90095573	C	T	3.226	0.24	0.09665	0.576033	0.425644	1
2	96614322	A	C	0.002	0.34	0.03035	0.602189	0.463457	1
12	9463867	G	A	17.26	0.34	0.98169	0.283776	0.837079	0.808001
19	15550387	G	A	15.05	0.41	0.94499	0.645312	0.999356	2
5	140614507	T	C	14.44	0.39	0.96768	0.060301	0.781956	0.185214
6	133055392	C	T	17.1	0.18	0.9333	0.573888	0.94719	3
9	127216844	T	C	0.026	0.27	0.1521	0.576033	0.346012	1
16	21848150	T	G	2.158	0.41	0.0432	0.618467	0.574036	1
7	50778600	T	C	1.92	0.29	0.11475	0.709663	0.232702	2
21	15352143	C	T	5.258	0.4	0.18282	0.112256	0.716799	0.185214
3	52621464	G	A	19.28	0.55	0.98254	0.724815	0.997243	5
9	125423915	G	A	1.272	0.31	0.05984	0.573888	0.743017	1
11	48387668	C	G	9.267	0.39	0.25085	0.573888	0.94944	2
2	48960037	C	T	6.761	0.28	0.29754	0.602189	0.512046	0
11	5142008	C	T	10.51	0.27	0.20962	0.063197	0.584524	0.185227
19	19290300	G	A	0.522	0.24	0.12604	0.175069	0.56644	0.188077
9	141070064	G	A	7.04	0.33	0.95703	0.078618	0.889142	0.185214
16	70010610	C	T	0.298	0.24	0.01968	0.659464	0.986695	0.185214
2	132905792	G	C	0.662	0.29	0.08461	0.573888	0.964927	2
2	132044753	A	C	7.595	0.26	0.16149	0.653264	0.736701	0
9	78790136	T	C	2.271	0.3	0.08816	0.573078	0.198732	2
19	41430339	C	T	7.357	0.26	0.82143	0.060301	0.324185	0.185214
18	49522	G	A	7.359	0.32	0.92931	0.547309	0.784384	0
9	99960660	C	T	5.899	0.6	0.52503	0.231597	0.80356	0.185214
6	32552130	C	A	0.002	0.31	0.11481	0.475579	0.29259	2
12	133049981	A	G	0.074	0.21	0.02922	0.547309	0.559699	0
16	21846475	A	G	1.538	0.42	0.04236	0.618467	0.967731	1
12	45567091	G	A	5.392	0.43	0.71379	0.333777	0.854436	0.185214
16	3131663	A	G	0.925	0.28	0.05527	0.602189	0.353369	0
19	7975100	G	C	2.768	0.32	0.23588	0.578056	0.752966	2
1	85723140	C	G	10.69	0.3	0.0775	0.608884	0.811359	2
19	33281906	G	C	10.21	0.13	0.92449	0.602189	0.969942	2
16	1479250	C	T	7.471	0.1	0.05754	0.578056	0.48018	0.66543
7	156433243	C	G	8.025	0.36	0.14269	0.519653	0.695552	1
2	102509334	A	C	5.074	0.32	0.32301	0.698795	0.565623	0
12	97043713	G	A	10.71	0.17	0.20725	0.573888	0.729571	2
21	46354912	G	A	0.363	0.391428	0.1076	0.576033	0.862926	1
19	53418471	A	G	0.97	0.21	0.07186	0.231597	0.30258	0.185214
16	29495572	A	G	3.316	0.47	0.04236	0.602189	0.920074	1
10	61718318	C	T	0.051	0.35	0.17591	0.547309	0.4158	1
10	135272566	G	A	11.23	0.33	0.98057	0.578056	0.997666	0.870543
1	19597040	C	T	13.66	0.18	0.96241	0.072005	0.766355	2
6	31239681	A	T	8.668	0.12	0.08575	0.519653	0.733178	1.0267
19	54726843	C	G	6.961	0.21	0.0511	0.514364	0.808438	0.997845
9	113550161	G	A	9.506	0.26	0.20089	0.573888	0.632986	2
12	133050630	A	G	0.638	0.318609	0.85392	0.578056	0.24199	1
6	56473451	A	G	18.43	0.57	0.94205	0.608884	0.998645	4
6	160921913	G	A	8.776	0.347075	0.87812	0.175069	0.445717	0.808001
5	177466410	G	A	11.51	0.39	0.02221	0.573888	0.883119	1
11	48387890	T	C	10.02	0.48	0.26331	0.573888	0.983467	2
15	102515344	A	C	13.45	0.55	0.96116	0.283776	0.900961	0.185214
10	17949554	G	A	0.197	0.5	0.10833	0.573888	0.300948	0
9	44991181	C	A	1.659	0.47	0.0574	0.618467	0.594206	0
19	15549635	C	T	8.329	0.24	0.17446	0.578056	0.930673	1
15	20457244	G	C	3.313	0.62	0.96848	0.083675	0.334133	0.808001
1	227247074	A	T	20.7	0.33	0.98644	0.547309	0.930865	0
11	86382777	G	C	3.384	0.42	0.16606	0.606814	0.576351	0
10	133608291	T	G	0.002	0.21	0.08204	0.600433	0.250085	1
12	63359553	C	G	3.764	0.27	0.07952	0.277913	0.599483	0.185214
12	97078887	G	A	11.98	0.28	0.64423	0.573888	0.940166	2
16	30235724	T	G	1.574	0.35	0.02643	0.618467	0.27015	0

## Sheet: test_regulatory_neutral
Chromosome	Position	Reference allele	Observed allele	CADD score	GWAVA score	FATHMM score	FitCons score	DANN score	FunSeq2 score
5	140612679	A	G	0.165	0.39	0.05518	0.060301	0.524574	2.42848e-39
16	29085600	G	C	7.503	0.48	0.88908	0.059349	0.597685	0.185214
10	50966122	T	C	3.855	0.16	0.17227	0.060301	0.553557	0.148273
19	15546053	A	C	0.123	0.42	0.04339	0.059349	0.269165	0.429157
6	56473733	T	G	20.7	0.61	0.99115	0.608884	0.995465	4
16	1472101	A	G	5.015	0.41	0.06819	0.083675	0.658784	0.188077
5	140617273	T	G	2.769	0.3	0.0905	0.074216	0.256089	1.01776e-43
8	105160069	C	A	3.929	0.36	0.12873	0.060301	0.553108	0.361897
1	148252162	G	A	6.898	0.45	0.1394	0.078618	0.824472	0.0625422
10	30657716	G	A	1.08	0.36	0.15711	0.060301	0.465137	0.188077
9	141063543	G	A	2.778	0.46	0.06488	0.063197	0.376408	5.08648e-31
19	50475385	T	A	1.9	0.17	0.05998	0.074216	0.76593	1.32627e-99
1	148931239	T	G	5.007	0.37	0.27868	0.172434	0.110742	0.185214
17	20224732	C	A	2.359	0.39	0.10113	0.070486	0.550775	0.185214
2	96523047	A	G	0.858	0.06	0.1205	0.060301	0.341851	0.00286289
16	21813918	G	A	1.286	0.5	0.0497	0.121303	0.37133	0.185214
2	96473094	A	G	0.596	0.29	0.03982	0.063197	0.316319	1.09894e-34
4	190861768	G	C	3.452	0.41	0.30296	0.064036	0.345319	2.24283
12	97043549	T	C	4.2	0.17	0.19857	0.063197	0.692157	0.00286289
16	29107559	A	C	15.1	0.6	0.90468	0.183335	0.926262	0.185214
3	195447484	C	G	0.838	0.17	0.02218	0.060301	0.333303	7.61296e-40
16	21825418	C	G	2.163	0.28	0.0607	0.059349	0.634169	5.0082e-25
19	41430151	G	T	5.273	0.5	0.1157	0.060301	0.821476	1.36063e-47
16	90095482	C	A	7.105	0.2	0.1743	0.645312	0.902044	1
8	26614138	A	G	1.627	0.33	0.09044	0.547309	0.582756	1
1	161199805	A	G	11.07	0.49	0.14319	0.69639	0.857613	1.04319
1	202795262	G	A	0.2	0.57	0.13925	0.083675	0.604739	0.188077
20	25755709	G	C	0.383	0.28	0.14072	0.578056	0.209743	1
9	90387983	T	C	6.213	0.22	0.14952	0.056003	0.700118	5.23248e-11
8	26614226	C	T	7.169	0.3	0.09366	0.547309	0.372264	0
9	139649247	G	A	2.569	0.18	0.08745	0.072005	0.650603	0.492101
6	24203535	C	A	3.066	0.18	0.02385	0.060301	0.195004	0.143092
17	64876951	C	T	0.37	0.34	0.04357	0.063197	0.596053	0.388575
10	112678657	G	T	13.7	0.25	0.47434	0.064036	0.871027	0.800093
15	20653826	A	G	2.96	0.36	0.02338	0.063197	0.652234	9.54719e-27
5	33751884	G	A	3.507	0.25	0.15421	0.060301	0.721303	0.00286289
12	97051722	C	T	10.96	0.43	0.84862	0.573888	0.731839	0
16	21963589	A	G	1.244	0.39	0.08558	0.100691	0.495401	0.79723
10	52505590	T	A	9.037	0.21	0.60207	0.060301	0.351021	0.0625422
6	45515254	G	A	0.179	0.63	0.1217	0.060301	0.48739	0.643444
1	155187144	A	G	13.36	0.46	0.93609	0.175069	0.635952	0.808001
22	21820203	G	T	7.325	0.39	0.18599	0.083675	0.924401	0
1	147806849	G	A	10.14	0.63	0.30867	0.064036	0.776676	1.76634
1	150779401	G	A	5.263	0.36	0.20128	0.091966	0.520209	0.168198
17	16735990	G	A	4.804	0.59	0.31869	0.060301	0.816953	0.185214
16	64984179	G	A	2.206	0.44	0.14671	0.063197	0.361959	1.12771
7	141765705	T	C	0.06	0.21	0.05598	0.060301	0.437026	0.0625422
1	148931789	G	A	2.424	0.45	0.10725	0.104817	0.466274	0.984929
10	123294967	G	A	0.175	0.5	0.09001	0.17184	0.650846	1.90134
9	33673319	C	T	3.591	0.23	0.0757	0.060301	0.619014	0
16	29347278	T	C	5.869	0.31	0.1243	0.059349	0.747112	0
7	142482556	T	C	1.006	0.35	0.04186	0.060301	0.471344	2.7538e-18
6	133055734	T	C	23.1	0.49	0.96224	0.573888	0.994278	3
3	12327431	T	G	4.115	0.4	0.11188	0.091372	0.60552	0.686423
22	21845364	C	T	6.79	0.46	0.09016	0.183335	0.643349	0.185214
16	96650	G	C	0.751	0.37	0.07678	0.125526	0.398446	0.511471
3	195383159	G	C	0.79	0.15	0.07144	0.060301	0.626397	0.185214
15	30434659	T	C	1.728	0.45	0.07313	0.063197	0.408504	0.00286289
17	62790050	G	C	3.458	0.42	0.0876	0.060301	0.522328	0.185214
16	21995058	T	A	6.388	0.36	0.19602	0.121303	0.685601	1.63541e-64
19	54742999	C	A	3.766	0.17	0.02939	0.060301	0.517262	0.960762
2	96640347	C	T	3.816	0.56	0.06669	0.060301	0.322031	0.00286289
3	101283170	C	T	0.457	0.31	0.02733	0.059349	0.432859	0.00286289
1	148565462	T	C	6.231	0.41	0.07921	0.121075	0.708125	0.00286289
16	30675315	G	A	16.6	0.53	0.82228	0.068936	0.808411	1.135
12	133036856	T	C	0.123	0.28	0.04524	0.104817	0.0814966	7.40457e-37
20	25759958	T	C	2.274	0.38	0.08241	0.078618	0.249215	0.00286289
2	48961395	C	T	4.916	0.28	0.16715	0.060301	0.82961	0.361897
19	1781576	G	A	2.195	0.22	0.06433	0.056003	0.809496	8.13557e-27
12	97078908	C	T	8.775	0.19	0.27481	0.573888	0.88632	2
12	57111118	T	G	9.661	0.51	0.78562	0.536957	0.613671	3
6	142466654	G	T	8.339	0.24	0.07221	0.060301	0.783727	6.36842e-87
16	29342546	T	C	2.802	0.22	0.05316	0.060301	0.68761	3.18092e-32
2	130899997	C	G	0.993	0.2	0.11011	0.577349	0.659449	1
20	25759997	C	T	2.581	0.37	0.05697	0.063197	0.359216	0.00286289
2	96613514	G	C	0.975	0.3	0.07118	0.060301	0.483487	0.00286289
5	140241027	G	T	0.891	0.45	0.29857	0.175069	0.544893	0.810864
2	241889798	C	T	2.116	0.1	0.11246	0.547309	0.348894	0
17	3214106	C	A	3.281	0.25	0.14059	0.060301	0.342053	0.185214
1	87105695	T	C	1.365	0.21	0.13445	0.060301	0.584269	4.76881e-37
17	38246286	A	G	16.13	0.51	0.94688	0.175069	0.798776	1.30258
1	206760494	C	T	9.202	0.29	0.55263	0.083675	0.833717	2.34998
16	29362711	T	C	6.215	0.4	0.29349	0.135981	0.698266	0.185214
11	48326662	A	T	1.053	0.26	0.06927	0.063197	0.633662	5.87718e-25
15	20629957	C	T	1.194	0.32	0.03559	0.063197	0.547419	0
1	145442264	T	A	9.319	0.47	0.16574	0.320204	0.814867	2.25577
3	64072872	G	A	2.981	0.22	0.10145	0.135981	0.54949	0.185214
9	141069460	G	A	2.849	0.39	0.18046	0.063197	0.858399	5.08648e-31
2	21268612	C	T	1.153	0.41	0.18898	0.056003	0.406955	1.85954e-75
3	195311084	T	A	3.435	0.48	0.20408	0.060301	0.589366	0.429157
12	70352153	A	T	0.28	0.24	0.1911	0.063197	0.500399	0.00286289
1	149670366	C	T	6.105	0.43	0.14305	0.183864	0.870277	0.79723
16	21809167	G	A	10.46	0.47	0.86516	0.331037	0.582388	8.60462e-10
16	3584233	G	A	7.713	0.35	0.1535	0.083675	0.839961	0.647909
6	163586569	C	A	2.538	0.2	0.14003	0.067067	0.457136	0.188077
15	83167422	A	T	7.563	0.36	0.41273	0.060301	0.674889	1.23501e-25
5	147810349	A	C	1.226	0.48	0.1493	0.060301	0.791722	0.148273
2	95515018	C	A	2.38	0.45	0.09882	0.063197	0.51653	0.185214
11	48347534	T	C	3.392	0.34	0.46523	0.063197	0.781787	0.808001
3	64072684	G	A	3.803	0.22	0.15824	0.091966	0.83562	0.185214
16	69151413	T	C	11.79	0.62	0.84784	0.320204	0.637948	0.106622
7	142482184	A	C	0.084	0.14	0.03998	0.060301	0.494821	0.98363
12	13526156	C	T	4.24	0.25	0.09693	0.573888	0.29705	0
16	74411957	G	A	1.222	0.1	0.02235	0.078618	0.435893	0.00286289
19	50840192	T	C	5.582	0.34	0.17685	0.073421	0.772239	0.609034
3	14105499	T	C	5.42	0.22	0.41556	0.060301	0.583949	0.00286289
3	14106568	C	T	1.585	0.52	0.05307	0.063197	0.288281	0.00286289
20	25760103	G	A	1.465	0.51	0.17216	0.063197	0.359624	0.00286289
17	15605252	C	T	0.275	0.28	0.04488	0.125526	0.306401	0.306886
1	35320991	G	A	4.848	0.49	0.13786	0.373304	0.722779	0.00286289
15	90807720	A	G	3.079	0.43	0.17587	0.091713	0.423528	0.800093
3	110612042	T	G	3.306	0.23	0.14001	0.743671	0.763129	0
19	51670397	G	T	1.455	0.61	0.0954	0.060301	0.762094	0.333487
17	78251518	G	A	2.379	0.28	0.1294	0.072005	0.641411	0.865012
4	9370839	C	T	2.167	0.25	0.05402	0.063197	0.165113	2.91297e-32
3	195311313	G	A	1.946	0.46	0.2638	0.060301	0.566162	0.185214
11	55319882	A	G	0.071	0.3	0.03432	0.063197	0.409543	3.04468e-111
15	23084828	C	A	3.696	0.2	0.10601	0.104817	0.465768	0.188077
5	14663047	T	C	0.078	0.37	0.11541	0.091372	0.355892	0.79723
8	19456473	C	T	1.775	0.25	0.04262	0.063197	0.340702	0.333487
5	673942	G	A	4.141	0.35	0.1006	0.125351	0.286065	0.247757
6	56471103	C	T	11.23	0.29	0.21007	0.65145	0.99761	4
4	190860583	A	G	0.61	0.21	0.07436	0.065499	0.427999	0.185214
10	128191659	A	G	0.857	0.24	0.18429	0.060301	0.212353	0.00286289
11	49832409	T	A	1.144	0.33	0.05372	0.063197	0.145811	0
12	9583221	G	A	8.079	0.44	0.86409	0.231597	0.744826	0.807997
9	33397790	G	T	1.179	0.16	0.08932	0.060301	0.660059	0.188077
7	37960154	C	T	8.514	0.52	0.24634	0.182457	0.575011	2.29116
10	37414679	G	C	3.615	0.62	0.07185	0.060301	0.893505	0.188077
1	2122723	C	G	0.703	0.27	0.06483	0.283776	0.375143	0.00286289
14	105290377	A	G	0.129	0.29	0.03661	0.056003	0.129031	0
2	96581721	A	T	0.275	0.3	0.14726	0.063197	0.419879	0.00286289
1	45109456	T	C	10.67	0.24	0.1812	0.17184	0.86908	0.931831
9	34835573	G	A	0.784	0.61	0.11696	0.063197	0.612866	0.185214
15	82569278	T	C	10.35	0.28	0.67766	0.063197	0.819232	0.306886
20	25745627	G	A	0.05	0.25	0.07212	0.573888	0.922194	1
15	82552583	A	T	0.506	0.36	0.0845	0.060301	0.694998	0.306886
6	124603378	A	G	6.015	0.37	0.0944	0.063197	0.748205	0.00286289
6	56468983	C	T	3.484	0.32	0.15903	0.65145	0.236286	0
19	56664539	G	A	7.593	0.31	0.11982	0.108573	0.756952	0.492101
9	141072058	G	A	0.257	0.41	0.04986	0.060301	0.485381	3.46287e-37
4	190860128	T	A	1.255	0.34	0.0542	0.060301	0.250657	7.34838e-65
14	106951238	G	A	3.536	0.41	0.05139	0.063197	0.62912	0.185214
19	51671188	C	G	1.953	0.33	0.09997	0.060301	0.443459	1.61859e-60
14	91234555	C	T	10.39	0.28	0.30685	0.060301	0.795918	0.147794
9	141070514	T	C	3.461	0.22	0.11539	0.063197	0.328899	0.982455
20	25759836	G	T	0.518	0.37	0.02467	0.063197	0.456455	0.00286289
6	4735115	C	T	0.807	0.09	0.04761	0.091713	0.609252	1.49131
19	50473530	T	C	2.147	0.27	0.04971	0.083675	0.743172	1.29913e-91
22	18804592	G	A	4.214	0.4	0.1066	0.063197	0.439705	7.80594e-11
15	76031008	C	T	15.48	0.47	0.88908	0.172434	0.938741	0.990493
18	113244	A	T	0.028	0.25	0.01652	0.063197	0.0380431	3.46287e-37
21	39528455	A	T	0.299	0.36	0.09798	0.573888	0.8559	2
7	48963064	G	A	1.348	0.13	0.02623	0.063197	0.26114	0.185214
19	3731337	A	G	2.103	0.15	0.06815	0.072005	0.462508	0.226462
16	30331730	G	C	0.953	0.28	0.07179	0.083675	0.372087	0.185214
5	140536184	G	T	21.8	0.38	0.99515	0.603688	0.998467	2
5	140614308	G	T	5.704	0.5	0.58616	0.083675	0.67683	0.808001
17	18927232	A	C	3.951	0.35	0.20637	0.074216	0.774584	0.844214
17	3213731	G	A	7.38	0.28	0.51103	0.060301	0.520424	0.808001
2	96582191	G	A	3.334	0.37	0.03324	0.063197	0.258914	0.188077
19	54723829	C	T	0.414	0.11	0.05102	0.060301	0.33378	1.14598
5	70671482	A	G	8.805	0.44	0.05909	0.060301	0.922118	6.58875e-46
15	20879368	C	T	3.603	0.37	0.07262	0.063197	0.547123	7.59848e-47
5	140538152	G	A	1.093	0.42	0.13713	0.063197	0.222679	0.00286289
19	56661904	A	G	1.819	0.37	0.02309	0.099841	0.165311	0.492101
5	122726095	C	G	14.06	0.52	0.53583	0.060301	0.81299	0.62565
12	13525943	C	T	2.062	0.51	0.06638	0.063197	0.21198	0.188077
6	160913931	C	T	6.117	0.47	0.73011	0.083675	0.777961	0.185214
17	26940272	G	A	3.119	0.63	0.18639	0.12342	0.420471	0.800093
4	140809315	A	G	6.58	0.29	0.20993	0.091713	0.665323	0.587857
6	32546863	G	T	1.318	0.45	0.10987	0.366681	0.608055	1.25993
21	14473416	G	A	1.933	0.41	0.06104	0.063197	0.659595	4.53469e-33
6	133055721	T	C	0.012	0.18	0.24125	0.573888	0.434392	0
11	89817771	C	T	2.953	0.27	0.02997	0.063197	0.709624	1.82247e-44
6	160921969	G	A	1.666	0.33	0.0795	0.175069	0.605628	0.185214
5	21478123	C	T	2.628	0.29	0.05355	0.060301	0.517854	3.54872e-31
9	119160791	T	C	6.236	0.32	0.29664	0.573888	0.971281	2
16	90095559	T	G	1.44	0.19	0.06215	0.576033	0.461246	0
6	114292185	T	C	9.208	0.65	0.04484	0.52208	0.553963	2
15	20875362	G	T	0.6	0.12	0.20645	0.063197	0.47572	0.185214
16	90096117	G	A	2.714	0.43	0.08811	0.129117	0.669853	1.67157
19	54724006	C	A	0.374	0.15	0.07108	0.060301	0.720594	0.960762
3	12942328	T	C	0.933	0.29	0.13681	0.295636	0.535594	0.168198
19	16675879	G	A	1.237	0.48	0.08427	0.137589	0.576914	0.531097
16	29342517	T	G	1.716	0.23	0.05072	0.060301	0.160236	8.274e-49
6	25097450	T	C	3.546	0.26	0.14922	0.060301	0.700347	0.429707
15	42300475	A	G	1.387	0.22	0.11636	0.063197	0.205565	0.148273
16	64989876	A	G	2.398	0.35	0.1576	0.063197	0.556887	0.147794
14	95109775	A	C	3.422	0.18	0.23801	0.060301	0.510369	9.48503e-09
9	99959667	C	T	2.15	0.2	0.41174	0.125526	0.537851	0.185214
16	29346178	G	A	1.88	0.42	0.129	0.060301	0.48704	0.185214
18	118436	G	A	1.765	0.67	0.56932	0.078618	0.738259	0.185214
1	247693966	T	C	0.305	0.51	0.01987	0.060301	0.360139	0.188077
1	148252935	C	T	2.598	0.4	0.01869	0.063197	0.48278	0.0625422
10	97116684	G	A	17.18	0.37	0.98022	0.547309	0.781466	0
19	54743004	A	T	1.9	0.11	0.10432	0.060301	0.58395	0.960762
16	15692013	G	A	3.081	0.21	0.13573	0.137589	0.500269	0.333487
15	90801059	A	T	9.445	0.4	0.1674	0.121075	0.858313	0.00286289
15	102390130	T	G	8.188	0.49	0.71448	0.063197	0.869296	1.17437e-21
2	102509338	C	T	5.595	0.28	0.22891	0.698795	0.672652	1
19	12221061	A	G	2.501	0.44	0.07879	0.12342	0.480504	0.226462
12	9580403	G	A	0.181	0.23	0.02152	0.125526	0.367135	1.59498e-93
9	141064741	A	C	0.034	0.23	0.03782	0.063197	0.215666	3.46287e-37
12	57109412	G	C	2.261	0.49	0.17014	0.082826	0.641923	0.462695
19	15545768	G	A	3.818	0.49	0.07455	0.059349	0.765844	0.243943
9	139870710	T	C	4.98	0.19	0.10782	0.074216	0.620249	0.185214
9	85672243	G	A	12.77	0.26	0.54986	0.056003	0.943928	0.148273
1	145095590	A	G	2.704	0.39	0.04609	0.060301	0.217138	0.188077
1	93619427	C	G	4.919	0.4	0.16792	0.175069	0.677484	0.702135
19	50473588	C	A	0.635	0.15	0.0634	0.060301	0.900056	0.185214
5	140538160	C	T	1	0.44	0.07719	0.063197	0.215105	0.00286289
6	26422354	C	T	5.735	0.34	0.13741	0.151085	0.639222	0.185214
1	147806447	C	T	8.444	0.26	0.25411	0.064036	0.506129	2.74253
20	17642630	G	A	7.58	0.26	0.03662	0.074216	0.922065	0.796488
4	189523290	G	A	1.787	0.14	0.06258	0.063197	0.638359	1.75769e-30
10	33495997	G	A	0.61	0.34	0.08785	0.060301	0.733624	0.511471
2	241623568	C	T	7.403	0.23	0.22821	0.074216	0.65213	0.185214
6	10430425	G	C	8.696	0.45	0.18494	0.060301	0.736378	0.79723
2	132046972	T	C	1.579	0.37	0.04953	0.063197	0.207046	0.226462
5	140534905	C	T	4.026	0.31	0.12203	0.059349	0.47031	1.1715e-51
11	6191743	C	T	5.039	0.47	0.18854	0.060301	0.567228	0.00286324
17	39255519	T	A	0.502	0.32	0.07507	0.060301	0.349122	7.7383e-85
10	51589688	T	G	2.954	0.55	0.1823	0.17184	0.571049	1.02128
16	33039720	G	T	3.28	0.29	0.67543	0.063197	0.689849	0.185214
16	29360210	C	T	2.269	0.32	0.05449	0.060301	0.633162	0.185214
1	247920528	G	T	0.013	0.29	0.04378	0.063197	0.233026	1.87071e-116
8	146203973	G	A	1.08	0.35	0.07572	0.128073	0.174286	8.58825e-17
5	137144441	G	A	1.907	0.58	0.15615	0.063197	0.609714	1.04596
2	95523584	G	A	10.74	0.36	0.80266	0.060301	0.658762	0.185214
8	7179415	A	G	3.275	0.43	0.10148	0.078618	0.642224	0
16	21963364	T	C	5.073	0.32	0.1234	0.112256	0.581593	2.66823e-29
2	219941030	T	C	0.984	0.54	0.08454	0.331037	0.524213	0.148273
17	21826341	C	T	0.589	0.22	0.0472	0.060301	0.34974	0.185214
5	140613990	A	C	1.502	0.45	0.32425	0.077002	0.589951	0.984451
17	3213862	C	G	1.538	0.22	0.09853	0.060301	0.456716	0.185214
1	236345718	C	A	6.328	0.18	0.12557	0.060301	0.621199	0.00286289
20	6105996	A	G	2.384	0.38	0.06756	0.060301	0.564279	5.48171e-29
1	148578654	A	T	0.109	0.39	0.06512	0.063197	0.373377	0.00286289
10	862530	C	T	4.526	0.33	0.1038	0.12342	0.471426	0.00286289
15	102390211	A	G	5.155	0.45	0.1452	0.063197	0.852194	9.85334e-16
16	29612146	T	C	0.444	0.41	0.054	0.097409	0.536316	0.185214
19	49560957	A	G	10.58	0.42	0.23584	0.119651	0.813194	0.934961
9	141069563	A	G	2.329	0.33	0.42466	0.063197	0.106888	0.185214
15	20700463	C	T	2.521	0.29	0.07365	0.063197	0.356623	4.2457e-23
16	29364166	A	T	1.411	0.38	0.06904	0.076284	0.617796	0.185214
13	64320877	G	A	1.414	0.46	0.04138	0.063197	0.711131	0.964489
9	78787695	C	T	9.626	0.26	0.57899	0.060301	0.778759	0.953363
16	74423073	C	G	0.34	0.27	0.03629	0.078618	0.295871	0.00286289
20	2795779	C	T	4.478	0.44	0.20767	0.074216	0.497218	0.188077
5	112227997	A	T	15.13	0.43	0.8118	0.696353	0.997976	1
7	72470276	T	C	0.372	0.29	0.55528	0.063197	0.202349	0
14	76964814	C	T	8.962	0.5	0.21857	0.060301	0.853581	0.51579
2	96546462	T	C	3.305	0.29	0.04918	0.060301	0.719009	0.00286289
17	34433282	C	T	4.543	0.28	0.10639	0.063197	0.640727	0.185214
1	16852865	T	C	1.666	0.21	0.03309	0.060301	0.281961	0
16	820328	A	C	0.312	0.24	0.07361	0.074216	0.333145	0.333487
22	32076919	G	A	3.834	0.35	0.06544	0.059349	0.510549	0.499125
12	9463968	G	A	5.108	0.1	0.07696	0.121787	0.709953	0.185214
8	7172824	G	A	4.117	0.38	0.07009	0.063197	0.904316	3.54872e-31
11	123849600	T	G	16.17	0.3	0.87743	0.063197	0.886656	1.08763e-30
14	38276855	A	T	3.345	0.13	0.20883	0.063197	0.266584	0.62565
5	767064	C	T	4.117	0.2	0.09608	0.578056	0.583728	-0.725366
11	4825612	G	C	1.151	0.28	0.21925	0.573888	0.95081	0.02327
10	134145288	C	A	9.015	0.42	0.26788	0.52208	0.65256	0
6	41169114	C	A	9.342	0.62	0.232	0.078125	0.842193	1.61742
10	6370338	C	T	6.797	0.56	0.15105	0.060301	0.596014	0.185214
5	21884101	A	G	19.59	0.39	0.96899	0.277913	0.910581	0.892754
1	200338053	T	C	3.119	0.33	0.1201	0.091713	0.795364	3.75435e-76
17	73597357	C	T	4.338	0.55	0.11759	0.065574	0.48933	1.42831
16	21813330	C	G	11.06	0.51	0.98902	0.065574	0.803426	0.99177
2	33953121	C	T	6.094	0.41	0.73015	0.078125	0.709234	0.185214
9	44900975	C	T	0.561	0.3	0.13078	0.063197	0.400955	0
11	123984683	T	C	7.736	0.31	0.16756	0.060301	0.79881	0.259452
15	102389848	T	C	0.455	0.42	0.17592	0.063197	0.612569	1.96675e-58
11	5130537	C	A	5.784	0.39	0.0926	0.063197	0.343023	4.53469e-33
10	17857058	A	C	0.867	0.29	0.10008	0.063197	0.530512	0.0625422
19	52097586	A	G	5.593	0.48	0.15766	0.182457	0.705344	0.800093
12	45567774	A	G	10.03	0.37	0.05306	0.183335	0.891821	0.185214
6	163611793	C	T	3.328	0.12	0.05405	0.060301	0.425861	0.633126
4	5529187	C	T	5.939	0.51	0.09781	0.060301	0.827825	0.00286289
7	156433555	C	A	11.41	0.5	0.05171	0.064036	0.577411	1.25993
3	195311327	C	T	1.343	0.5	0.14724	0.060301	0.564876	0.185214
14	106949327	C	G	6.781	0.35	0.06599	0.063197	0.784746	1.36843e-26
3	110611948	C	T	0.466	0.29	0.0578	0.125526	0.552584	0.00286289
19	53418420	A	C	0.007	0.19	0.03376	0.121303	0.20633	9.50057e-87
7	301227	C	G	2.742	0.31	0.08259	0.074216	0.66965	0.188077
19	58512227	G	A	3.642	0.4	0.21844	0.072005	0.728605	0.769181
1	47366096	G	T	0.824	0.56	0.13644	0.063197	0.661823	0.185214
13	101833577	G	A	5.01	0.3	0.15348	0.573888	0.833197	2
2	33952569	T	C	10.87	0.28	0.95273	0.060301	0.705044	0.185214
10	5237425	T	C	0.741	0.54	0.04583	0.060301	0.688439	0.00286289
9	141066120	T	C	0.933	0.4	0.06285	0.063197	0.43589	5.08648e-31
15	102282802	G	A	7.424	0.47	0.24256	0.060301	0.372354	0.00286289
19	54709443	T	G	6.692	0.22	0.20409	0.106797	0.537112	1.14598
18	119128	T	C	0.301	0.42	0.04363	0.063197	0.171238	1.62786e-39
5	177468964	G	A	3.928	0.27	0.08421	0.063197	0.518445	0.00286289
5	17389354	T	A	3.733	0.27	0.02673	0.060301	0.335246	1.74198e-42
12	97079040	C	T	0.548	0.18	0.07748	0.063197	0.319534	0.00286289
1	149613251	T	C	1.365	0.2	0.05522	0.063197	0.11539	0
11	48326063	C	G	0.206	0.17	0.01565	0.063197	0.280554	2.59379e-49
15	42304189	G	T	2.861	0.33	0.16963	0.063197	0.784654	0.148273
15	52632373	G	A	6.549	0.37	0.23196	0.065499	0.783105	0.696686
15	23314123	T	A	7.122	0.34	0.3994	0.078618	0.438692	3.30993e-35
7	66773866	A	G	6.396	0.26	0.15303	0.137589	0.374871	2.91297e-32
16	90165821	T	A	5.167	0.36	0.10285	0.060301	0.594669	0.185214
2	96583735	A	C	0.027	0.28	0.02098	0.063197	0.160706	0.00286289
5	174422094	G	T	0.965	0.33	0.07123	0.063197	0.486448	0.185214
20	4713217	G	A	0.577	0.12	0.08031	0.547309	0.225475	-0.600878
18	115645	C	A	3.192	0.27	0.06119	0.063197	0.326767	2.80202e-34
13	53108773	C	G	2.678	0.36	0.05837	0.063197	0.214203	0.185214
17	64878734	G	A	0.323	0.21	0.06956	0.063197	0.386715	0.388575
15	20490501	C	T	10.37	0.33	0.8935	0.060301	0.439609	9.48503e-09
12	31353619	T	C	2.532	0.25	0.16251	0.060301	0.579619	0.622787
12	133033979	G	A	4.374	0.14	0.07423	0.074216	0.910421	0.185214
11	48346202	G	T	0.34	0.39	0.09678	0.063197	0.533533	3.05795e-74
1	57509598	C	T	4.876	0.33	0.15689	0.078618	0.280772	1.05182
16	820302	G	T	1.66	0.13	0.17305	0.074216	0.761034	0.333487
2	96553596	G	A	0.097	0.35	0.04246	0.060301	0.59676	0.00286289
11	85437264	A	G	1.407	0.32	0.40329	0.527494	0.503182	1
19	54707276	C	T	5.739	0.38	0.15226	0.151085	0.637083	1.75799
19	54740705	G	A	2.696	0.39	0.06699	0.121075	0.45196	0.960762
20	17637829	G	A	2.011	0.34	0.08243	0.060301	0.472516	0.981702
2	96482601	G	A	8.179	0.39	0.18161	0.078618	0.782547	0.185214
2	132913003	T	C	3.311	0.42	0.07798	0.063197	0.756718	0.966994
15	83167559	C	T	0.642	0.17	0.03323	0.060301	0.598085	5.87399e-48
12	97078749	A	G	1.809	0.15	0.15835	0.063197	0.510616	0.00286289
6	132696016	T	G	3.848	0.5	0.22935	0.060301	0.552684	1.05177
2	132118427	T	A	1.088	0.36	0.06562	0.056003	0.391082	0.185214
1	116914639	G	C	4.263	0.33	0.3991	0.104817	0.631785	4.7468e-12
12	69002859	T	C	3.111	0.3	0.14794	0.060301	0.203309	0.185214
20	24929840	C	T	0.955	0.4	0.13401	0.063197	0.327968	0.291836
7	102120154	C	T	2.655	0.34	0.06333	0.060301	0.216406	0
22	50013573	A	G	1.993	0.32	0.02373	0.060301	0.223475	0.00286289
21	46354750	G	A	5.149	0.4	0.18544	0.731555	0.928559	1
19	53787375	C	T	0.43	0.19	0.04045	0.083675	0.520563	0.185214
6	133055876	G	A	6.109	0.55	0.42466	0.063197	0.574526	1.37556
2	167133929	G	T	2.447	0.27	0.13025	0.063197	0.347398	0.62565
3	185652032	T	C	5.385	0.24	0.10593	0.151085	0.458553	1.10412
6	29856655	G	C	2.282	0.37	0.10819	0.209056	0.634815	0.185214
20	25757701	T	G	4.024	0.28	0.07866	0.060301	0.750958	0.00286289
5	79647685	A	C	10.39	0.28	0.87793	0.059349	0.43993	0.185214
3	75475707	G	T	7.003	0.37	0.6389	0.121787	0.804647	0.185214
2	137746603	G	A	4.27	0.28	0.14108	0.063197	0.591591	0.0625422
16	29568155	C	T	1.679	0.42	0.05979	0.078618	0.542332	0
17	73595848	T	C	1.144	0.19	0.02481	0.060301	0.177456	0.208878
6	13470415	G	A	0.98	0.32	0.17046	0.527494	0.709984	1
8	39250629	A	T	0.137	0.15	0.069	0.063197	0.334788	2.22658e-106
17	36390759	G	A	1.86	0.52	0.05822	0.076284	0.905529	0.00286289
6	51479682	T	C	2.339	0.29	0.11871	0.063197	0.533428	6.50856e-49
15	102462051	G	A	0.128	0.31	0.06054	0.063197	0.157402	1.61156e-97
15	28900983	A	G	13.38	0.23	0.93259	0.231597	0.73963	0.185214
1	167385144	C	G	10.84	0.58	0.97367	0.292756	0.748963	0.79908
11	67564135	G	C	0.043	0.09	0.05675	0.068591	0.35044	0.185214
9	67290444	T	C	1.162	0.48	0.12439	0.056003	0.229388	0.185214
16	79246535	T	C	9.259	0.36	0.15573	0.258966	0.813875	0.734389
11	114418587	T	C	8.969	0.37	0.0782	0.060301	0.926721	0.00286289
19	50473570	T	C	0.251	0.21	0.0781	0.060301	0.412495	0.185214
17	16735173	G	A	9.478	0.31	0.10489	0.060301	0.899287	0.429707
3	75476692	C	A	6.003	0.31	0.13876	0.17184	0.910309	0.185214
16	29408955	C	T	5.049	0.37	0.05669	0.078618	0.87588	0.994633
6	56473679	A	G	11.39	0.55	0.23466	0.608884	0.224541	3
19	50475174	A	C	2.813	0.13	0.05284	0.074216	0.836673	0.185214
1	147807621	T	G	4.77	0.21	0.09442	0.090647	0.391865	0.185214
11	86381171	G	A	5.254	0.33	0.12411	0.056003	0.694047	0.312174
11	55747136	G	C	0.527	0.27	0.04886	0.083675	0.361242	0.185214
9	141070831	C	T	2.647	0.27	0.85991	0.078618	0.322514	0.185214
11	85437866	G	T	2.911	0.51	0.17432	0.573888	0.905809	1
10	3183883	G	A	0.41	0.37	0.10955	0.564498	0.595337	-0.513329
6	96033124	A	G	1.932	0.24	0.09329	0.063197	0.506459	0.00286289
16	820353	A	C	0.471	0.26	0.11109	0.074216	0.42557	0.333487
9	127220515	G	A	15.43	0.17	0.89724	0.077002	0.975013	2
17	34433029	A	G	16.26	0.34	0.34882	0.063197	0.890821	3.97081e-59
7	142481590	C	T	5.327	0.21	0.36505	0.060301	0.50316	0.622786
17	3214145	T	C	20.4	0.32	0.98455	0.060301	0.904991	0.808001
21	47620754	T	C	9.48	0.27	0.56859	0.137589	0.354187	0.547112
11	107462942	G	A	19.84	0.26	0.74389	0.125351	0.897255	0.247757
20	17638537	C	T	3.247	0.32	0.08377	0.081037	0.661162	1.59372
20	30514545	T	A	3.527	0.15	0.09941	0.060301	0.545261	0.482556
19	57177341	C	G	1.304	0.25	0.07544	0.074216	0.673103	0.188077
9	90388188	C	T	0.963	0.14	0.04896	0.056003	0.745333	7.62544e-118
16	60592	G	A	0.921	0.39	0.11478	0.063197	0.867508	0.185214
1	249112614	G	A	2.388	0.39	0.10334	0.121303	0.532131	0.402643
1	144678640	T	A	6.624	0.23	0.12485	0.060301	0.831181	0
21	14470167	A	C	0.286	0.48	0.07144	0.063197	0.43392	0.185214
16	70011298	T	C	3.148	0.27	0.0301	0.183335	0.804492	1.27218e-21
16	30135798	C	T	9.8	0.58	0.28582	0.060301	0.597448	0.79723
20	34145822	G	A	3.486	0.16	0.18897	0.128073	0.670529	0.185214
2	96558163	G	A	1.761	0.16	0.05597	0.063197	0.175699	0.00286289
15	68120644	T	C	10.2	0.32	0.2342	0.104817	0.68079	0.810863
7	158423664	A	C	0.246	0.41	0.13272	0.121787	0.514192	0.185214
4	189523389	C	T	2.682	0.19	0.06404	0.063197	0.844773	6.47851e-24
20	17634178	C	T	0.797	0.45	0.06103	0.060301	0.796245	0.981702
1	148349644	G	A	3.438	0.52	0.32022	0.060301	0.498711	0.185214
21	46528055	A	C	1.764	0.49	0.08661	0.060301	0.691277	0.57833
16	29344781	T	G	4.381	0.42	0.07582	0.060301	0.398405	4.54333e-26
15	82559422	A	G	2.736	0.38	0.12505	0.112256	0.609024	0.492101
5	671294	C	G	5.304	0.24	0.11379	0.073421	0.570862	0.247757
9	136215617	C	T	2.906	0.27	0.19724	0.600757	0.829888	0
10	49893366	C	T	5.552	0.36	0.19973	0.060301	0.80877	0.333487
20	29620216	C	T	2.424	0.39	0.02802	0.066767	0.269557	0.8948
7	141783543	G	A	2.833	0.34	0.09484	0.060301	0.371513	0.0625422
9	33625221	A	G	19.36	0.41	0.88369	0.292756	0.940676	0.185214
7	76631570	T	C	11.93	0.43	0.79334	0.129117	0.569335	0.247757
7	72420539	C	T	7.536	0.3	0.16362	0.17184	0.808221	0.865012
5	179073824	C	T	3.816	0.39	0.06916	0.060301	0.454602	3.54872e-31
20	30369090	C	T	0.687	0.44	0.04581	0.128073	0.52462	0.411676
20	17641364	G	A	0.38	0.37	0.09717	0.083675	0.538526	1.59372
22	21579934	G	A	0.536	0.43	0.02835	0.060301	0.724162	0.168198
9	141066800	G	A	4.844	0.32	0.08367	0.063197	0.788031	5.08648e-31
16	79245726	G	A	2.288	0.44	0.12064	0.675528	0.876839	-1.75364
3	75984540	G	A	2.66	0.46	0.10237	0.066767	0.774726	0.493601
2	96473546	G	C	0.249	0.33	0.04379	0.078618	0.507001	2.60723e-51
7	55753145	G	C	5.442	0.17	0.12797	0.060301	0.816977	0.185214
12	133034050	C	T	1.653	0.11	0.06135	0.074216	0.3994	0
11	94915792	A	G	3.774	0.38	0.09889	0.121303	0.727597	0.147794
6	153473725	C	T	0.716	0.25	0.08267	0.063197	0.303882	0.185214
14	95108072	C	T	2.631	0.45	0.07541	0.060301	0.699165	0.185214
16	29110135	A	G	2.264	0.16	0.03942	0.059349	0.453582	1.60194e-56
19	58511682	T	C	0.649	0.45	0.0361	0.137589	0.167773	0.583967
10	135236717	A	C	5.48	0.38	0.1491	0.115951	0.716155	0.247757
6	133048024	A	G	19.89	0.23	0.97707	0.547309	0.99235	3
5	21478101	G	A	0.212	0.26	0.03531	0.060301	0.732939	7.40457e-37
11	65360243	G	A	7.304	0.24	0.13487	0.182457	0.914697	0.98566
9	141070532	T	C	0.715	0.21	0.15766	0.063197	0.0766688	0.97593
16	15697599	G	A	1.536	0.38	0.06912	0.125526	0.658501	0.148273
12	9464229	C	T	5.507	0.12	0.08587	0.17184	0.839385	1.29349e-128
20	61145681	G	A	5.475	0.22	0.10758	0.074216	0.229915	0.185214
16	29339515	G	A	3.911	0.55	0.09877	0.060301	0.528524	0.79723
22	21633356	C	T	2.674	0.33	0.01991	0.063197	0.465921	0
19	49559518	C	G	8.675	0.47	0.05669	0.666236	0.601195	2
10	97116273	C	T	8.892	0.16	0.09221	0.547309	0.837337	0
19	24009443	A	G	0.862	0.27	0.09769	0.083675	0.82103	0.148273
19	54709379	G	A	2.669	0.2	0.12352	0.106797	0.404019	1.14598
21	10991876	T	A	6.02	0.32	0.0508	0.076284	0.448463	0.00286289
10	79627387	A	G	3.433	0.36	0.11712	0.106748	0.565105	0.499125
6	15545863	A	T	1.292	0.27	0.21312	0.060301	0.773218	1.38897
10	89156613	G	C	0.382	0.29	0.05645	0.060301	0.174235	2.91297e-32
2	132905099	G	T	0.621	0.27	0.06596	0.063197	0.758691	3.54872e-31
10	133608355	G	A	0.255	0.22	0.08865	0.600433	0.486079	0
1	233785641	A	T	4.117	0.34	0.07576	0.083675	0.849134	0.313911
18	76874460	C	T	2.055	0.17	0.10469	0.060301	0.461429	0.296164
19	23406120	G	T	0.03	0.39	0.11759	0.702456	0.367834	0
15	23283460	T	A	2.033	0.33	0.19936	0.183335	0.288323	0
15	102281418	T	C	7.879	0.44	0.1388	0.074216	0.893304	0.00286289
12	132590703	G	T	0.435	0.43	0.02969	0.060301	0.495598	0.00286289
4	7009912	G	A	2.754	0.39	0.13682	0.050388	0.469133	1.45429
19	15882016	C	G	3.022	0.25	0.12892	0.063197	0.644657	0.185214
9	125423881	T	G	1.393	0.34	0.14767	0.573888	0.933109	1
11	2018186	C	T	11.41	0.25	0.31275	0.129117	0.926617	0.185214
6	29077689	C	T	11.7	0.3	0.09254	0.063197	0.824346	5.42976e-64
9	141068637	G	A	1.079	0.3	0.05954	0.078618	0.428192	5.08648e-31
21	14472976	C	T	1.78	0.38	0.05669	0.063197	0.191905	0
8	39331043	C	T	0.558	0.22	0.0863	0.060301	0.727072	0.185214
2	241623790	C	A	6.321	0.26	0.06264	0.074216	0.796202	6.40839e-43
12	56557383	G	A	18.96	0.63	0.91003	0.193828	0.849941	1.76876
4	41634517	A	G	2.604	0.36	0.11008	0.060301	0.56271	0.188077
17	21826996	C	T	3.84	0.34	0.06735	0.060301	0.644533	5.96904e-31
4	190884855	G	A	4.328	0.32	0.16367	0.082826	0.227563	0.615233
2	132048479	T	G	1.596	0.23	0.05127	0.063197	0.151617	0.226462
7	142479755	C	G	1.52	0.03	0.08267	0.060301	0.588683	0.185214
7	302002	A	G	0.037	0.36	0.06281	0.074216	0.0488841	0.188077
2	96560303	T	C	0.446	0.27	0.05009	0.063197	0.494091	0.188077
14	96135857	C	T	0.393	0.47	0.05856	0.091372	0.599279	1.19598e-59
12	9455317	G	A	0.025	0.14	0.02811	0.231597	0.589681	1.60456e-134
16	21813147	C	G	1.176	0.43	0.84304	0.067067	0.521087	0.185214
17	21907893	T	G	2.639	0.22	0.02674	0.060301	0.261112	0
1	147759783	T	C	1.561	0.34	0.07272	0.063197	0.699794	4.73519e-42
15	20771825	G	T	0.288	0.44	0.04604	0.063197	0.533957	8.10025e-64
15	76074392	C	T	0.825	0.35	0.04666	0.060301	0.591146	3.09731e-48
19	35849410	A	T	8.417	0.63	0.87582	0.066767	0.68554	1.25156
22	20716154	A	G	4.426	0.36	0.09636	0.060301	0.0844743	0.188077
1	87599876	G	A	0.703	0.43	0.14915	0.129117	0.55788	0.333487
6	3026933	T	C	0.873	0.27	0.13215	0.121787	0.422966	0.79723
2	132039051	G	A	3.934	0.33	0.04254	0.078618	0.75436	0.226462
15	23443591	T	C	1.553	0.61	0.02527	0.063197	0.502274	4.48804e-29
10	89095040	G	A	2.231	0.13	0.0626	0.121303	0.651964	2.55039e-27
15	23285498	T	A	2.788	0.41	0.05992	0.277913	0.229926	0
9	141062494	A	G	14.77	0.32	0.70439	0.063197	0.975514	5.08648e-31
4	5977566	C	A	2.278	0.1	0.04013	0.060301	0.397612	0.00286289
13	111110833	G	A	0.08	0.22	0.07033	0.074216	0.563277	0.716918
4	106159264	C	T	1.778	0.32	0.05161	0.060301	0.15732	0.148273
16	31766921	C	T	3.284	0.54	0.0868	0.547309	0.928051	2
16	83984844	A	C	1.59	0.29	0.04606	0.68496	0.550648	3
22	21044704	C	T	8.083	0.14	0.15367	0.547309	0.921535	0.185214
19	55048320	A	T	17.1	0.39	0.64535	0.573888	0.8145	1
4	1244605	G	T	0.016	0.22	0.0865	0.121787	0.317071	1.73194
15	102464377	G	A	3.188	0.33	0.04563	0.063197	0.688574	2.60865e-28
10	61719107	T	G	13.16	0.49	0.67919	0.060301	0.837992	0.00286289
16	21825731	A	G	9.937	0.36	0.10733	0.059349	0.85838	0
12	132588412	C	T	0.097	0.38	0.02792	0.120862	0.680838	0.188077
1	145333562	C	G	0.068	0.36	0.03526	0.063197	0.273305	0.306886
19	11796326	A	G	2.493	0.34	0.09026	0.060301	0.690363	0.185214
20	62474759	C	T	2.092	0.33	0.07379	0.074216	0.510133	0.185214
2	74390530	A	G	1.196	0.34	0.0639	0.128073	0.38681	0.188077
3	155836414	A	C	0.101	0.3	0.13454	0.063197	0.461147	0.330576
2	96638132	C	T	4.586	0.52	0.07683	0.060301	0.236552	0.00286289
9	127237245	G	A	2.944	0.48	0.18899	0.065574	0.548803	0.188077
9	100056934	A	G	8.031	0.31	0.1613	0.060301	0.838202	0.00286305
5	177456317	C	G	1.293	0.31	0.05899	0.063197	0.261512	0.00286289
19	7975464	A	C	0.01	0.32	0.0873	0.12342	0.38844	0.660303
1	1598908	A	G	0.105	0.23	0.04183	0.125526	0.14983	0.00286289
11	4720668	C	T	2.564	0.37	0.05717	0.060301	0.375907	0.00286289
1	19597156	T	A	3.878	0.28	0.09392	0.074216	0.655615	0.185214
11	123984748	G	A	4.344	0.38	0.07408	0.078125	0.767522	0.79723
5	140617260	G	T	0.269	0.22	0.03014	0.074216	0.475751	2.54901e-50
17	76226721	C	T	7.453	0.47	0.1523	0.104817	0.912065	0.99177
7	72398760	A	T	1.819	0.5	0.15129	0.082826	0.834149	0.679798
16	29350722	G	A	4.751	0.35	0.06037	0.060301	0.389292	1.78822
16	29341214	A	C	0.036	0.37	0.03274	0.066767	0.324113	2.93405e-58
1	174518122	C	T	4.884	0.48	0.09414	0.060301	0.521415	0.929673
14	106948818	G	A	0.145	0.47	0.03298	0.063197	0.466694	3.76355e-46
7	142479625	A	T	0.242	0.08	0.12287	0.060301	0.298256	2.25339e-41
17	34433400	G	A	11.03	0.31	0.41994	0.063197	0.677355	0.622784
11	61648113	C	T	2.204	0.45	0.07438	0.074216	0.712609	1.93301
22	18773595	C	T	1.457	0.2	0.05569	0.063197	0.300246	0
2	95515296	C	T	0.125	0.5	0.0156	0.063197	0.327862	1.43205e-90
19	33321447	A	G	4.693	0.37	0.14719	0.060301	0.637034	0.429157
12	9448920	T	G	4.266	0.25	0.0919	0.175069	0.678845	4.3062e-13
20	29618562	A	T	0.11	0.2	0.04358	0.066767	0.367595	1.69203
10	30658147	A	G	5.497	0.32	0.1002	0.060301	0.770993	0.00286289
17	39260103	C	G	4.355	0.36	0.03293	0.060301	0.387305	0.185214
2	132040600	A	G	0.527	0.49	0.04725	0.078618	0.243754	0.226462
13	53152323	G	C	0.169	0.29	0.03935	0.060301	0.502357	2.07336e-32
16	29356326	A	G	0.475	0.19	0.03291	0.060301	0.203119	7.40457e-37
16	30135517	G	C	0.005	0.44	0.02983	0.060301	0.289361	0.79723
22	21832470	A	C	0.128	0.36	0.06798	0.078618	0.415063	2.74557e-71
1	24393729	G	A	4.122	0.11	0.06156	0.063197	0.759418	0.994633
1	144678738	T	C	1.506	0.22	0.02596	0.083675	0.418285	0
9	78792158	C	T	1.447	0.27	0.0577	0.083675	0.698631	0.330576
1	147806987	G	C	7.602	0.39	0.23465	0.064036	0.55061	1.76634
9	40495666	T	A	5.592	0.43	0.07828	0.063197	0.619661	2.8313e-21
22	41618372	A	G	3.04	0.38	0.02034	0.137589	0.616747	0.243943
4	189523256	A	G	0.189	0.1	0.02012	0.063197	0.127202	2.60723e-51
5	112228709	G	A	3.076	0.2	0.09293	0.670488	0.895432	1
2	241623979	G	A	1.096	0.25	0.04914	0.072005	0.263315	0.185214
5	179279839	G	A	5.063	0.52	0.14357	0.137589	0.706134	0.188077
1	161565705	A	G	0.441	0.15	0.04118	0.060301	0.21957	0.854111
9	46703421	T	G	5.569	0.47	0.10214	0.063197	0.754904	0.185214
22	31688172	C	T	7.85	0.37	0.3167	0.215285	0.734635	1.40632
2	96473345	T	G	1.104	0.28	0.08174	0.078618	0.38723	4.14863e-45
1	39802283	G	C	2.621	0.47	0.16715	0.463624	0.335748	3
10	51576402	T	C	14.67	0.54	0.59433	0.083675	0.847014	2.61265
8	55576577	A	G	4.31	0.34	0.17219	0.063197	0.835819	7.09104e-28
1	241756366	C	T	2.238	0.45	0.11582	0.060301	0.54006	0.0847532
3	14106499	G	A	2.429	0.46	0.10916	0.063197	0.329451	0.00286289
22	18824077	C	A	3.063	0.33	0.01576	0.063197	0.49622	2.65447e-27
22	18780459	C	T	1.167	0.31	0.10827	0.078618	0.693955	0.185214
5	156277561	G	A	4.632	0.48	0.06712	0.068591	0.928558	0.185214
9	44903481	A	T	1.149	0.34	0.06723	0.063197	0.374918	0
2	95521701	T	A	2.516	0.27	0.08917	0.060301	0.55394	2.06548e-46
7	92100483	C	T	7.041	0.43	0.08351	0.060301	0.651413	0.00286289
10	81587541	T	G	3.808	0.32	0.05988	0.112256	0.10367	1.70958e-27
19	36392355	G	A	2.732	0.35	0.08485	0.094292	0.439478	0.492101
16	3138472	G	A	0.767	0.26	0.07466	0.097409	0.381792	0.185214
2	33952995	C	G	1.815	0.3	0.07983	0.060301	0.268615	0.185214
14	95078677	G	T	3.915	0.91	0.43679	0.063197	0.868499	3.5997
10	112679191	C	T	6.8	0.45	0.60447	0.064036	0.732693	0.984971
10	13736352	T	C	5.726	0.26	0.14773	0.12342	0.779053	0.269968
6	133055729	C	T	22.6	0.22	0.82784	0.573888	0.997356	2
9	141069765	T	C	0.489	0.25	0.03993	0.063197	0.122506	3.46287e-37
11	114392676	A	T	0.175	0.4	0.12999	0.063197	0.468284	0.00286289
11	63655846	C	T	12.37	0.47	0.30803	0.128841	0.75403	2.38121
12	45567192	G	A	11.75	0.44	0.33109	0.333777	0.943752	0.185214
2	132912142	T	G	0.74	0.25	0.03718	0.063197	0.449574	0.966994
3	33689911	G	A	1.893	0.46	0.08615	0.060301	0.600854	0.820004
8	74172076	T	G	1.867	0.3	0.05403	0.060301	0.457445	2.95168e-99
15	102283726	A	G	0.893	0.44	0.03156	0.060301	0.653312	0.188077
6	31237893	G	T	5.036	0.29	0.11882	0.121787	0.811974	1.83326
7	156903308	T	C	17.71	0.37	0.07772	0.547309	0.709429	1
16	21963203	A	C	1.648	0.36	0.04574	0.112256	0.690005	2.60723e-51
14	50065359	C	G	6.613	0.38	0.41083	0.47417	0.504325	0
16	30136114	C	T	3.017	0.45	0.06541	0.067067	0.58882	0.185214
4	3592019	G	A	5.592	0.45	0.21187	0.060301	0.77399	0.188077
3	128292060	G	A	2.709	0.39	0.03899	0.060301	0.449063	0.00286289
5	135206837	T	A	8.039	0.42	0.18109	0.060301	0.788657	0.00286289
10	46971408	C	T	10.7	0.34	0.23089	0.182457	0.833679	1.10443
2	944603	G	A	5.297	0.36	0.12584	0.112256	0.384648	0.12696
12	133037091	G	A	3.205	0.13	0.08052	0.104817	0.709826	3.54872e-31
19	33282109	C	T	2.278	0.31	0.12831	0.060301	0.378217	0.00286289
8	8089646	G	A	3.641	0.33	0.07377	0.060301	0.728077	0.9861
8	133071997	C	T	13.38	0.69	0.51681	0.060301	0.753135	1.67603
13	64319681	T	C	0.742	0.24	0.02147	0.063197	0.14362	0
16	74400017	A	G	0.947	0.38	0.05975	0.083675	0.687471	1.70958e-27
6	31237254	C	T	3.291	0.38	0.09124	0.254355	0.28151	1.0267
15	32820574	T	C	1.407	0.18	0.02589	0.076284	0.20131	0
16	15696377	C	T	1.186	0.28	0.03887	0.547309	0.858505	1
19	54707248	A	T	6.188	0.38	0.12882	0.166053	0.834016	1.75799
19	53884458	G	A	0.001	0.28	0.05736	0.463624	0.0580799	1
1	178514967	C	T	4.63	0.33	0.2374	0.602189	0.747169	1
2	96646293	T	C	2.545	0.54	0.05389	0.060301	0.452413	0.00286289
3	187896943	C	T	6.205	0.33	0.12207	0.048193	0.59103	0.992149
11	49832368	A	G	2.072	0.33	0.07565	0.063197	0.434351	2.91297e-32
2	96578621	G	A	3.958	0.25	0.08495	0.078618	0.457787	0.00286289
11	5152503	G	T	0.877	0.44	0.10577	0.063197	0.608465	1.53955e-118
2	96645069	A	G	5.853	0.26	0.03739	0.060301	0.572689	0.188077
15	83057480	C	G	0.602	0.46	0.06035	0.078618	0.465487	2.23629e-69
12	31270328	C	T	5.402	0.27	0.28148	0.182457	0.663002	0.79723
12	133035932	C	T	4.248	0.44	0.06583	0.104817	0.55631	0.985819
6	7986654	A	G	1.273	0.45	0.03113	0.060301	0.0767493	1.44956
15	100332743	A	G	0.064	0.38	0.11199	0.067067	0.122983	0.185214
7	92098650	T	C	13.71	0.17	0.53587	0.547309	0.978005	1
9	33389306	C	G	1.174	0.16	0.09481	0.060301	0.324712	0.00286289
15	82569499	G	A	7.458	0.35	0.06267	0.063197	0.7236	0.306886
14	36791581	C	A	5.739	0.39	0.14075	0.063197	0.390227	0.00508354
16	29346622	G	A	3.442	0.37	0.77959	0.060301	0.322684	0
14	24909979	C	T	10.89	0.57	0.70718	0.320204	0.831723	2.29763
12	31309030	G	A	6.091	0.49	0.10845	0.060301	0.850824	0.185214
15	102390445	G	A	3.979	0.39	0.09083	0.063197	0.677541	0.185214
7	32984286	G	A	6.264	0.14	0.12354	0.091372	0.923616	0.00286289
1	149614771	C	T	0.116	0.34	0.02765	0.063197	0.556268	2.96051e-46
22	42971999	C	T	15.03	0.31	0.89546	0.320204	0.898341	0.807938
7	92101769	C	G	6.23	0.47	0.10448	0.060301	0.557846	0.00286289
7	48963383	A	C	0.108	0.17	0.03811	0.063197	0.574767	1.91813e-87
2	96549121	C	T	1.301	0.3	0.03819	0.060301	0.107043	0.00286289
10	12292454	A	G	5.847	0.25	0.18597	0.743671	0.471806	0.810527
15	32813871	T	A	4.332	0.23	0.09858	0.063197	0.38346	0
9	139877020	G	A	8.508	0.54	0.22235	0.074216	0.829548	2.36036
12	8386926	C	T	6.466	0.36	0.85889	0.068591	0.766528	0.185214
9	46700193	G	A	0.176	0.31	0.03404	0.063197	0.251033	1.29137e-50
2	96578331	C	G	3.263	0.37	0.07028	0.063197	0.223896	0.00286289
19	54728666	T	C	3.221	0.17	0.12099	0.060301	0.213615	1.95253
12	9457142	C	G	3.722	0.15	0.09515	0.128073	0.735324	9.19032e-20
15	100332561	G	A	2.753	0.43	0.25985	0.048193	0.759272	0.185214
21	43166626	T	G	4.525	0.37	0.0971	0.091966	0.439242	0.372955
19	55049332	G	C	2.193	0.24	0.15696	0.063197	0.718377	0.188077
22	16159060	G	A	1.836	0.57	0.05661	0.063197	0.436794	0
9	141070584	T	C	0.533	0.2	0.02411	0.078618	0.161413	0.185214
20	17642549	G	A	8.537	0.3	0.22624	0.074216	0.692472	2.2165
16	60600	G	A	0.925	0.38	0.10426	0.063197	0.870642	0.185214
8	23145585	T	G	8.229	0.65	0.20616	0.172434	0.732632	2.2407
1	31903634	T	C	4.328	0.26	0.08021	0.175069	0.792856	0.00286289
17	79278775	C	T	5.933	0.37	0.07061	0.074216	0.788376	0.185214
2	132043654	C	G	2.672	0.32	0.06268	0.078618	0.500525	0.226462
22	18725763	A	G	0.595	0.32	0.03929	0.063197	0.161199	0.00286289
18	19995075	T	C	0.32	0.39	0.06869	0.063197	0.480319	0.00286289
19	23406165	T	C	0.003	0.4	0.02157	0.702456	0.259982	0
12	9572244	A	G	0.661	0.31	0.03614	0.128073	0.483794	3.08974e-78
7	38725699	C	A	1.502	0.54	0.03879	0.060301	0.41087	0.00286289
4	140813664	T	A	6.318	0.38	0.09123	0.060301	0.8138	0.402643
16	12010444	A	C	6.122	0.41	0.40612	0.182457	0.703974	2.5074
16	29097297	C	T	3.23	0.37	0.45701	0.063197	0.783793	0.185214
1	85009837	G	T	2.967	0.63	0.16907	0.060301	0.777206	2.41714e-31
15	42033682	T	C	5.667	0.41	0.21462	0.128073	0.526515	0.929673
15	20875501	C	T	1.256	0.2	0.06039	0.063197	0.145307	1.36322e-40
2	241623729	C	T	5.258	0.3	0.07955	0.074216	0.49281	2.68718e-24
9	141069978	C	A	2.434	0.27	0.06265	0.063197	0.568195	0
22	21608470	A	G	0.248	0.4	0.02721	0.063197	0.524275	2.41465e-60
2	96541695	C	T	1.193	0.4	0.05722	0.063197	0.239869	0.00286289
1	47333601	T	C	11.63	0.28	0.90319	0.063197	0.69405	4.52852e-17
6	29273203	G	A	0.949	0.44	0.0806	0.060301	0.420237	2.83208e-83
8	146202334	T	G	9.605	0.34	0.56479	0.331037	0.953441	0.808001
10	51590519	A	C	1.346	0.45	0.27432	0.283776	0.559736	1.02128
2	96633504	A	G	7.431	0.5	0.06357	0.060301	0.754611	0.00286289
12	133035112	C	T	2.94	0.22	0.07416	0.104817	0.550905	0.185214
16	18594466	A	C	6.853	0.41	0.14097	0.060301	0.785081	0.259452
20	29618488	A	G	2.394	0.25	0.03046	0.066767	0.330977	1.69203
6	28897980	T	C	8.275	0.34	0.18544	0.060301	0.906027	1.28786e-18
17	21203820	G	C	1.172	0.57	0.2237	0.074216	0.525374	0.865012
12	39710524	G	A	4.328	0.28	0.15928	0.060301	0.639234	0.306886
1	227247515	A	C	3.322	0.29	0.18294	0.060301	0.579349	0.831665
14	106948781	A	G	3.542	0.34	0.08835	0.063197	0.680087	9.22038e-29
1	41235946	G	A	4.387	0.5	0.20502	0.137589	0.527358	0.802175
20	30435396	A	G	8.492	0.34	0.30013	0.060301	0.911485	0.991771
2	132043774	A	G	2.404	0.32	0.01946	0.063197	0.170078	0.226462
16	12010759	G	A	8.074	0.35	0.39203	0.125351	0.763715	1.54385
13	44734534	G	T	1.052	0.28	0.18369	0.060301	0.153803	0.188077
16	70011185	T	A	0.887	0.31	0.04586	0.183335	0.548515	0
10	5236808	C	T	6.216	0.39	0.08891	0.060301	0.797297	0.00286289
20	25757171	C	T	1.773	0.5	0.03433	0.091713	0.560547	0.00286289
11	48347492	G	A	1.818	0.4	0.16523	0.063197	0.366417	0.188077
10	52384913	A	G	10.28	0.43	0.53116	0.064036	0.81719	1.8369
9	113551235	A	C	0.96	0.23	0.07971	0.063197	0.469804	0.46554
16	29369040	G	T	1.55	0.34	0.07079	0.063197	0.683561	3.54872e-31
7	98936535	G	A	4.746	0.47	0.14741	0.128073	0.82018	0.695358
19	10163380	G	A	2.837	0.46	0.09665	0.060301	0.835631	0.185214
1	70224033	G	T	11.94	0.33	0.14271	0.063197	0.820016	0.330576
14	38218343	A	G	0.001	0.27	0.11005	0.573888	0.324609	1
16	70012318	G	T	1.401	0.21	0.02364	0.183335	0.439408	0
7	142482590	A	C	0.108	0.29	0.12026	0.060301	0.601943	0.185214
9	141065446	A	G	2.209	0.34	0.02776	0.063197	0.563935	5.08648e-31
10	37413682	C	T	2.615	0.4	0.05875	0.060301	0.91888	0.981755
10	47746682	A	G	1.088	0.3	0.0389	0.063197	0.285819	0.185214
4	41634859	C	T	6.444	0.18	0.19224	0.547309	0.564934	0
19	22939456	T	G	0.061	0.33	0.0449	0.573888	0.285523	1
1	144679246	G	A	2.272	0.32	0.06304	0.060301	0.387776	1.16768e-42
12	133065832	A	G	8.288	0.37	0.09491	0.125351	0.681973	0.188077
11	55746735	G	A	4.215	0.34	0.04002	0.060301	0.440905	0.185214
12	9449014	C	G	0.17	0.22	0.04841	0.175069	0.532372	5.71787e-84
10	71393025	A	G	2.765	0.22	0.08731	0.343423	0.393439	0.00286289
1	210805472	C	T	4.622	0.33	0.06362	0.063197	0.693258	0.675416
16	820398	C	A	3.786	0.06	0.15285	0.074216	0.736093	0.333487
7	1887697	C	G	1.409	0.28	0.0928	0.074216	0.496057	0.00286289
20	31477252	T	C	4.326	0.21	0.11118	0.060301	0.682464	0.188077
2	96644857	A	G	4.755	0.35	0.08592	0.060301	0.619158	0.00286289
19	54656555	C	T	2.444	0.31	0.1069	0.082826	0.910367	1.77939
12	53208932	T	A	6.61	0.2	0.12586	0.060301	0.608773	1.4235e-49
11	48326592	G	A	0.141	0.22	0.02224	0.063197	0.121595	2.59379e-49
4	9371274	G	T	0.2	0.29	0.04745	0.063197	0.341271	3.32076e-44
1	12947931	C	G	2.202	0.4	0.06393	0.063197	0.319828	1.92754e-27
21	14469584	T	C	0.458	0.4	0.61503	0.063197	0.284706	0.185214
13	42015595	C	T	1.971	0.27	0.07441	0.063197	0.640204	0
16	29413051	T	C	2.234	0.35	0.06715	0.063197	0.344684	0.188077
3	97981165	C	T	1.706	0.3	0.03563	0.063197	0.235416	5.42237e-48
5	38844751	C	G	1.616	0.26	0.13963	0.056003	0.600059	1.91414
9	78796733	G	A	3.19	0.22	0.11495	0.081037	0.565568	0.330576
2	69693006	C	T	6.723	0.22	0.28436	0.80507	0.680653	1.38666
6	31238345	T	G	7.765	0.3	0.11305	0.068591	0.662841	1.0267
3	14105552	G	A	1.797	0.49	0.0994	0.060301	0.495464	0.00286289
8	82569069	T	C	2.707	0.43	0.09622	0.060301	0.732571	5.40469e-39
13	28519377	C	T	6.402	0.46	0.05496	0.277913	0.614815	0.00286289
16	29338527	G	A	3.406	0.39	0.03323	0.060301	0.268754	0.185214
15	90800293	G	A	2.017	0.09	0.06552	0.091372	0.28365	0.00286289
2	95521095	G	A	1.115	0.29	0.03956	0.060301	0.152915	2.4584e-36
1	236340980	T	C	0.493	0.31	0.02989	0.060301	0.337693	0.00286289
10	42969180	A	G	1.561	0.38	0.07599	0.063197	0.272861	8.46759e-27
11	48326196	C	T	3.071	0.22	0.06826	0.063197	0.445463	5.87718e-25
7	26578283	G	A	5.447	0.51	0.19851	0.060301	0.699502	0.291836
14	20692999	T	G	10.65	0.42	0.74294	0.063197	0.740114	0.622787
19	55048437	C	T	1.025	0.37	0.05358	0.063197	0.494283	0.00286289
6	12933912	G	A	4.548	0.32	0.10887	0.547309	0.954366	1
16	29342500	T	A	3.425	0.29	0.08879	0.060301	0.190443	0
16	21823817	G	T	1.525	0.41	0.15624	0.128073	0.166328	1.42971e-12
17	74222347	C	G	18.16	0.19	0.94995	0.068591	0.927372	0.333487
9	127216595	G	T	19.25	0.47	0.97811	0.068936	0.910113	0.62565
7	26576757	G	C	5.812	0.25	0.37579	0.067067	0.757991	0.729408
4	5975547	G	A	26.9	0.16	0.95357	0.547309	0.995945	2
12	24736860	C	T	9.602	0.29	0.09594	0.060301	0.91229	0.185214
11	5152920	G	A	3.966	0.39	0.29585	0.063197	0.570769	0.185214
20	25758670	C	G	0.5	0.42	0.03753	0.063197	0.28258	0.00286289
7	142479741	C	T	2.066	0.07	0.10695	0.060301	0.529667	0.978729
16	88634861	C	T	2.704	0.09	0.07402	0.060301	0.885054	0
16	15696222	A	G	2.389	0.29	0.05508	0.083675	0.139196	0.148273
19	19289179	G	A	3.577	0.25	0.10385	0.121787	0.652979	1.26469
10	89099817	G	C	0.53	0.37	0.04989	0.060301	0.184865	1.94017e-45
16	21822727	A	G	0.81	0.32	0.03909	0.128073	0.564784	2.08127e-18
3	155655779	T	C	5.752	0.5	0.29714	0.231514	0.78668	0.968669
12	9580699	T	C	6.104	0.4	0.04231	0.125526	0.843836	1.27043e-05
15	102390166	C	T	3.466	0.35	0.05785	0.063197	0.577919	1.48159e-49
16	29610778	C	G	7.108	0.43	0.04235	0.068591	0.783689	0.185214
4	3588657	G	A	1.44	0.35	0.06038	0.078125	0.561429	0.00286289
16	29624247	C	A	7.5	0.46	0.06878	0.215285	0.673373	0.185214
12	31285101	A	G	3.393	0.15	0.0424	0.063197	0.637004	2.40808e-28
8	105104313	A	G	3.903	0.23	0.12887	0.063197	0.566324	0.361897
9	117093024	C	T	2.674	0.13	0.13444	0.059349	0.484777	0.800093
22	18827506	A	G	1.626	0.28	0.02191	0.063197	0.449321	2.47923e-47
1	144676861	C	T	1.435	0.48	0.10283	0.060301	0.638121	4.04276e-35
19	15881989	G	A	0.569	0.2	0.083	0.063197	0.510022	0.185214
10	89127064	C	T	0.017	0.29	0.0149	0.063197	0.630025	0.00286289
11	49052125	C	T	5.114	0.14	0.09368	0.063197	0.65695	0.00286289
12	9574951	T	C	0.729	0.29	0.05047	0.125526	0.46316	1.09625e-64
14	36791472	T	C	5.971	0.48	0.24748	0.063197	0.705082	0.622787
20	17634531	G	A	2.125	0.47	0.13791	0.060301	0.571926	0.796488
5	671338	T	C	3.425	0.2	0.05519	0.073421	0.366656	0.247757
15	20875358	C	T	4.553	0.14	0.33797	0.063197	0.722035	0.185214
12	63330046	T	C	12.03	0.49	0.94452	0.134018	0.547344	1.00833
15	80215987	C	A	9.201	0.44	0.59193	0.52208	0.771916	1
20	30512713	C	T	4.077	0.33	0.12741	0.060301	0.706154	0.482556
5	673408	T	C	6.351	0.29	0.12631	0.108573	0.769363	0.247757
11	48326640	G	T	0.36	0.21	0.05134	0.063197	0.46577	2.59379e-49
16	1469695	A	G	1.305	0.51	0.04034	0.112256	0.375017	1.3459e-66
19	3725873	C	G	0.551	0.46	0.08971	0.128841	0.479092	1.02369
8	104213686	C	T	1.837	0.33	0.05103	0.063197	0.665189	0.0625422
19	58761533	A	G	2.088	0.24	0.0315	0.17184	0.343832	0.0625422
15	102280793	A	T	2.649	0.23	0.09641	0.060301	0.631855	0.00286289
11	48347759	G	A	4.11	0.34	0.12544	0.063197	0.658162	5.23248e-11
19	41524153	T	C	0.529	0.38	0.11355	0.183335	0.50371	0.188077
2	71621316	G	A	4.856	0.17	0.10445	0.12342	0.591599	0.547112
2	242692490	T	C	3.344	0.24	0.04398	0.129117	0.596148	0.147794
17	71166701	A	G	14.41	0.42	0.7622	0.152955	0.838189	0.499125
12	9453864	A	G	1.653	0.33	0.0299	0.125526	0.395798	0.978574
6	96032879	G	A	0.04	0.35	0.03505	0.063197	0.472838	0.00286289
4	41631153	C	T	17.33	0.4	0.68051	0.060301	0.753296	0.188077
1	47349968	G	A	3.998	0.28	0.07243	0.063197	0.393355	0
5	112227636	G	A	3.459	0.24	0.33972	0.658983	0.397238	0
7	50778372	G	A	2.381	0.4	0.07078	0.083675	0.479188	0.52149
21	15352485	T	G	4.307	0.5	0.13396	0.182457	0.313077	0.185214
15	20494786	T	C	3.708	0.35	0.04333	0.060301	0.672178	0.185214
10	42921368	T	C	7.025	0.23	0.10867	0.060301	0.856251	3.1049e-18
12	133036296	T	G	5.876	0.38	0.10853	0.104817	0.736952	0.185214
2	96474721	G	A	2.665	0.4	0.06113	0.063197	0.206403	5.96904e-31
13	111110303	T	C	2.531	0.16	0.04914	0.074216	0.655419	0.716918
19	54711160	C	T	0.245	0.34	0.06722	0.292527	0.752527	1.14598
20	17641928	T	C	3.128	0.28	0.172	0.060301	0.560335	1.59372
6	56471798	T	C	6.233	0.17	0.20107	0.696353	0.96642	3
11	50246573	G	A	0.388	0.32	0.03021	0.063197	0.43968	0
19	54722911	T	C	2.942	0.11	0.10645	0.060301	0.352855	1.14598
2	96577142	C	A	1.229	0.35	0.10469	0.063197	0.050274	0.188077
17	50211171	A	G	6.035	0.18	0.21522	0.063197	0.816039	0.70754
12	11420387	T	C	0.006	0.27	0.06255	0.183335	0.449321	1
1	171121421	G	T	3.678	0.46	0.27585	0.063197	0.677289	0.226462
16	15189841	C	G	2.278	0.58	0.02413	0.059349	0.193008	0.296164
15	28900722	T	C	11.78	0.25	0.97208	0.331037	0.841359	0.808001
22	21321483	G	T	15.18	0.51	0.5817	0.127595	0.908643	1.73063
12	45566982	G	A	6.338	0.5	0.82288	0.175069	0.618592	0.185214
19	15882796	T	A	4.737	0.27	0.04704	0.063197	0.528786	6.42409e-13
18	32887914	A	G	11.05	0.35	0.89895	0.283776	0.781157	0.185214
5	140612726	C	A	6.97	0.39	0.17293	0.060301	0.528446	0.622787
6	31506744	A	C	7.415	0.3	0.12929	0.106797	0.593189	1.78191
19	19554745	G	C	2.112	0.24	0.10505	0.059349	0.609736	1.04319
2	176994739	G	A	21.6	0.43	0.37358	0.104817	0.973665	2.42881
18	114613	A	G	1.372	0.25	0.02718	0.063197	0.497892	1.56915e-48
12	133036199	G	A	2.28	0.28	0.06619	0.104817	0.784141	0.185214
22	25715747	C	T	0.69	0.16	0.06414	0.083675	0.785188	0.185214
15	83167559	C	A	0.702	0.17	0.05548	0.060301	0.464014	5.87399e-48
12	10703993	C	G	6.609	0.24	0.05292	0.063197	0.849865	0.185214
16	70016055	A	C	0.124	0.25	0.03402	0.078618	0.44712	2.96455e-62
6	56470289	T	C	7.771	0.26	0.42563	0.670488	0.48126	4
15	100333076	G	A	1.804	0.32	0.05071	0.060301	0.280129	5.57801e-28
20	58588333	T	C	3.93	0.25	0.17735	0.060301	0.753373	0.62565
6	56329713	T	C	1.405	0.48	0.07257	0.125526	0.352951	0.531704
2	132904677	A	G	0.519	0.33	0.00528	0.067067	0.349731	0.185214
2	171570080	C	G	10.59	0.48	0.11045	0.125351	0.868421	0.188077
16	30337186	A	T	0.162	0.35	0.02349	0.060301	0.124311	8.01692e-60
16	78586041	A	G	4.636	0.3	0.15203	0.091713	0.777619	0.734389
16	90089123	T	G	5.672	0.53	0.09985	0.064036	0.488417	0.865012
5	751470	A	G	0.102	0.07	0.03221	0.060301	0.10315	0.732274
9	44902128	G	A	0.97	0.39	0.04942	0.063197	0.468939	0
16	21854922	A	G	0.973	0.64	0.03671	0.063197	0.403039	0.00286289
1	146490754	A	G	2.649	0.34	0.04352	0.083675	0.678499	3.38554e-36
8	99048329	C	T	15.07	0.52	0.18138	0.175069	0.797632	0.361897
3	75475589	G	A	0.376	0.33	0.05626	0.068591	0.798875	0.99177
2	132118650	C	G	1.127	0.37	0.76261	0.056003	0.166822	0.185214
2	96484055	C	T	0.347	0.39	0.06204	0.078618	0.32836	0.185214
11	85431886	G	A	14.53	0.63	0.95131	0.083675	0.673657	0.729408
17	21907956	A	T	0.737	0.2	0.07295	0.060301	0.187611	0
2	237150311	T	C	16.14	0.47	0.95914	0.074216	0.688159	0.188077
10	134899585	G	A	8.261	0.24	0.11557	0.074216	0.898954	0.188077
9	127215330	C	A	12.61	0.22	0.20168	0.61531	0.555528	0
12	133065712	G	A	1.281	0.3	0.04326	0.125351	0.784457	0.188077
2	96601109	C	T	0.303	0.36	0.0438	0.060301	0.130347	0.00286289
3	14107071	C	T	3.245	0.52	0.07868	0.091245	0.665536	0.188077
16	29350077	G	A	4.106	0.36	0.07853	0.060301	0.719441	0.185214
1	55166381	G	T	2.739	0.16	0.18446	0.063197	0.729741	0.00286289
6	114293063	G	A	2.116	0.33	0.09858	0.091966	0.206651	1.17754
16	30347216	T	C	1.844	0.51	0.09541	0.096973	0.100061	1.78124
7	37960206	C	T	17.53	0.58	0.69668	0.606814	0.998434	2
19	56732335	T	C	0.558	0.18	0.0367	0.072005	0.167666	3.10321e-41
9	78788473	G	A	9.013	0.2	0.05744	0.060301	0.778239	0.330576
1	47364655	G	A	2.253	0.33	0.09088	0.063197	0.65672	0.185214
1	16850647	A	T	0.012	0.31	0.03994	0.060301	0.283599	7.40457e-37
18	1278665	C	T	10.2	0.18	0.27075	0.063197	0.839805	4.53469e-33
20	30620347	T	C	0.599	0.32	0.12684	0.121787	0.530534	2.02872e-70
15	28900391	C	T	4.341	0.15	0.28442	0.121303	0.619876	1.96782e-35
2	96582837	C	G	2.248	0.45	0.10398	0.063197	0.152334	0.188077
9	127215448	C	T	7.451	0.18	0.27545	0.673471	0.950152	1
3	47931291	A	G	4.28	0.31	0.11072	0.083675	0.433022	0.587857
1	146493578	G	A	7.51	0.33	0.17654	0.060301	0.81243	0.185214
14	96137646	T	C	0.779	0.18	0.09205	0.056003	0.34009	9.94495e-66
9	119903506	C	T	3.633	0.11	0.13527	0.063197	0.414495	0.148273
14	94929055	C	T	7.306	0.45	0.38684	0.063197	0.681304	0.62565
7	92102203	G	A	8.616	0.37	0.16887	0.060301	0.894681	0.00286289
17	21825993	T	G	2.599	0.27	0.02846	0.060301	0.173863	0.185214
15	23282589	A	G	1.789	0.39	0.38839	0.277913	0.328088	0.185214
2	96544119	G	C	0.646	0.37	0.08821	0.063197	0.335435	0.00286289
9	141069424	C	G	1.256	0.36	0.03645	0.063197	0.124963	5.08648e-31
3	183756780	A	C	0.042	0.38	0.13363	0.060301	0.208338	0.00286289
10	51590396	C	T	8.271	0.47	0.54358	0.320204	0.596478	1.64402
15	90799884	C	T	0.261	0.14	0.03752	0.121075	0.171829	0.00286289
11	85438808	A	G	16.34	0.59	0.9731	0.573888	0.424277	0
9	44904433	A	G	1.074	0.36	0.02058	0.063197	0.27205	0
6	123104703	A	G	2.816	0.15	0.23531	0.060301	0.552553	1.09734
9	30410144	C	T	6.434	0.25	0.15281	0.063197	0.61733	2.47586e-31
15	23283594	T	G	2.785	0.31	0.23281	0.078618	0.184817	0
10	5238170	T	C	2.293	0.64	0.21436	0.060301	0.784369	0.979625
3	161090322	A	G	11.83	0.48	0.45612	0.064036	0.715006	0.810864
1	148932219	G	A	2.722	0.38	0.22214	0.091372	0.599759	0.98142
16	90106270	A	G	1.936	0.24	0.08536	0.072005	0.648319	0.865012
14	48143852	C	T	16.04	0.27	0.91969	0.606884	0.985445	2
11	48345261	T	G	7.97	0.33	0.05642	0.063197	0.758344	0.185214
16	29340099	T	C	3.75	0.29	0.0554	0.067067	0.4714	0.976785
7	142760866	G	A	1.958	0.46	0.06497	0.063197	0.394267	7.59848e-47
2	74392940	C	T	10.25	0.42	0.10666	0.128073	0.82034	0.252795
16	90166109	A	C	0.505	0.44	0.06893	0.060301	0.420912	0
15	102279984	A	G	5.612	0.32	0.10263	0.602189	0.677433	0.00286289
10	47929852	C	T	10.92	0.42	0.89499	0.618467	0.703377	0
19	24009714	G	A	1.42	0.37	0.07375	0.059349	0.625054	0.148273
9	139870160	C	T	8.326	0.21	0.25901	0.050388	0.908278	1.73103
10	51589453	T	C	11.83	0.65	0.34076	0.320204	0.87017	1.64407
20	26085244	T	C	0.262	0.29	0.0446	0.060301	0.510419	2.93405e-58
16	70057136	C	T	6.712	0.37	0.03709	0.125526	0.406736	4.81838e-41
9	78784467	A	G	0.807	0.24	0.12987	0.121303	0.495153	0.330576
16	90095585	C	T	3.298	0.25	0.07061	0.576033	0.517955	1
7	76632135	C	T	3.563	0.36	0.11024	0.074216	0.521981	1.05391
16	90097672	C	A	7.63	0.45	0.24548	0.608884	0.989197	1.4878
17	34433429	A	G	2.622	0.25	0.19902	0.063197	0.622824	8.60462e-10
20	23522628	A	G	1.844	0.45	0.16926	0.063197	0.801266	4.21777e-05
19	33282145	T	G	9.71	0.21	0.83963	0.060301	0.570747	0.62565
12	57108695	C	G	2.025	0.4	0.10529	0.12342	0.477151	0.647909
22	46499191	G	A	5.02	0.27	0.13678	0.074216	0.621137	0.0028629
4	9370803	G	T	0.015	0.24	0.03076	0.063197	0.174997	1.09894e-34
9	33388289	C	T	2.876	0.35	0.06441	0.091966	0.75715	0.00286289
11	48326479	A	G	1.14	0.18	0.02701	0.063197	0.490335	2.82976e-44
7	886919	G	A	2.843	0.4	0.16378	0.129117	0.59013	1.16811
21	47613231	C	G	4.15	0.32	0.13766	0.128073	0.361456	0.547112
6	30025102	G	A	0.05	0.33	0.04379	0.175069	0.736542	2.26695e-229
3	14105278	C	T	8.296	0.22	0.18062	0.060301	0.782779	0.00286289
16	90165859	T	G	2.028	0.38	0.0528	0.060301	0.224899	0.185214
11	65004301	G	A	11.63	0.38	0.97582	0.283776	0.776528	0.808001
10	124376987	C	T	3.237	0.3	0.11247	0.063197	0.60648	0.147794
11	48328818	C	T	4.721	0.27	0.10838	0.063197	0.670779	1.80274e-63
3	52620714	G	T	0.774	0.59	0.28399	0.128073	0.332238	0.830677
1	85720326	G	T	0.764	0.19	0.05247	0.121303	0.221551	0.00286289
16	21995147	A	G	0.565	0.39	0.09062	0.121303	0.587809	2.28302e-77
12	97043961	G	A	6.722	0.25	0.13836	0.063197	0.773177	0.00286289
17	3214735	G	A	5.54	0.31	0.28843	0.060301	0.645264	0.622787
2	96582824	C	T	2.878	0.45	0.0997	0.063197	0.166212	0.188077
12	31269551	T	C	6.755	0.31	0.20551	0.060301	0.631913	0.185214
16	30193621	A	G	2.734	0.51	0.08506	0.091372	0.376439	0.185214
19	55045079	C	G	0.095	0.28	0.10535	0.573888	0.712044	1.92724
11	117957258	C	T	5.953	0.25	0.1889	0.060301	0.559573	0.247757
9	115379234	C	T	2.488	0.49	0.17334	0.060301	0.407016	0.994633
16	74397973	G	A	0.338	0.41	0.03887	0.17184	0.436545	1.50762e-48
10	42922692	G	C	9.786	0.25	0.82997	0.547309	0.593564	0.185214
10	50969501	C	G	12.15	0.42	0.18974	0.125351	0.842378	0.333487

## Sheet: test_splicing_deleterious
Chromosome	Position	Reference allele	Observed allele	CADD score	GWAVA score	FATHMM score	FitCons score	DANN score	FunSeq2 score
15	20740295	A	T	0.002	0.22	0.02971	0.573888	0.50131	0
7	100608370	A	C	12.56	0.36	0.75997	0.674405	0.987934	0
16	58537808	G	A	28.5	0.36	0.95625	0.696353	0.995002	3
11	12534909	T	G	27	0.27	0.99255	0.547309	0.994586	2
15	20740294	G	T	0.059	0.21	0.038	0.573888	0.503453	1
20	44174410	C	T	19.02	0.15	0.24875	0.547309	0.841251	2

## Sheet: test_splicing_neutral
Chromosome	Position	Reference allele	Observed allele	CADD score	GWAVA score	FATHMM score	FitCons score	DANN score	FunSeq2 score
15	42375978	C	T	23.7	0.33	0.91926	0.056003	0.99021	0.956274
15	31229463	G	A	5.592	0.49	0.21784	0.137589	0.574933	0.188077
20	44333556	C	A	0.741	0.42	0.08563	0.618467	0.522248	0.00286289
7	107763575	C	T	24.1	0.35	0.96857	0.573888	0.964328	0.62565
11	14520533	T	C	25.9	0.52	0.92742	0.10224	0.973018	1.5004
16	57016150	G	A	23.9	0.31	0.90127	0.060301	0.928266	0.353412

## Sheet: test_missense_deleterious
Chromosome	Position	Reference allele	Observed allele	CADD score	GWAVA score	FATHMM score	FitCons score	DANN score	FunSeq2 score	MAPP prediction	MAPP score	PhD-SNP prediction	PhD-SNP reliability index	PolyPhen-1 prediction	PolyPhen-2 score	SIFT score	SNAP prediction	SNAP score	PredictSNP1 prediction	PredictSNP1 score
17	42287592	A	G	21.7	0.43	0.52584	0.601644	0.860894	4	Deleterious	0.298046	Neutral	7	Benign	0.984	0.75	Neutral	7	Neutral	0.74
10	61552692	G	T	24.3	0.33	0.99681	0.697927	0.993086	2	Deleterious	0.416581	Neutral	7	Possibly damaging	0.996	0.01	Neutral	0	Neutral	0.6
9	137717724	G	A	13.35	0.16	0.52221	0.80507	0.343793	2	Deleterious	0.946864	Neutral	9	Benign	0.576	1	Neutral	6	Neutral	0.75
1	94645488	C	T	20.2	0.68	0.91612	0.618467	0.999613	3	Deleterious	0.974013	Neutral	5	Benign	0.916	0	Neutral	3	Neutral	0.63
8	125565703	G	A	21.3	0.47	0.89593	0.606735	0.999371	3	Neutral	0.00709208	Disease	5	Benign	1	0	Non-neutral	4	Deleterious	0.87
5	174936054	G	T	27	0.43	0.99058	0.724815	0.994469	3	Deleterious	0.301997	Disease	8	Benign	0.546	0.1	Neutral	1	Deleterious	0.51
22	37333459	C	T	25.5	0.38	0.72264	0.547309	0.99882	4	Deleterious	0.549869	Neutral	6	Benign	1	0.03	Non-neutral	1	Deleterious	0.55
11	57982361	C	G	18.26	0.23	0.07635	0.573888	0.980476	2	Deleterious	0.245916	Neutral	5	Benign	0.938	0.08	Neutral	1	Neutral	0.74
5	135391436	C	T	24.4	0.25	0.75307	0.709663	0.991431	2	Deleterious	0.69592	Neutral	7	Benign	0.398	0.04	Neutral	2	Neutral	0.74
21	45798938	G	A	31	0.15	0.98733	0.578056	0.999546	3	Deleterious	0.826197	Disease	2	Benign	1	0.02	Neutral	4	Deleterious	0.55
3	46399208	G	A	12.61	0.26	0.56185	0.573888	0.976107	1	Neutral	0.999882	Neutral	6	Benign	0.63	0.32	Neutral	6	Neutral	0.75
2	242195708	C	T	25.9	0.39	0.99021	0.724815	0.998653	4	Deleterious	0.538865	Neutral	4	Benign	0.346	0	Non-neutral	1	Neutral	0.63
7	31146119	G	A	31	0.29	0.99649	0.709663	0.999119	3	Deleterious	0.171247	Disease	8	Possibly damaging	0.998	0	Non-neutral	1	Deleterious	0.72
5	74325860	C	T	24	0.49	0.99205	0.658983	0.993331	2	Deleterious	0.107691	Neutral	6	Possibly damaging	0.986	0	Non-neutral	1	Deleterious	0.61
1	161928323	C	T	21.2	0.42	0.90621	0.709663	0.999267	3	Neutral	0.0303636	Disease	1	Benign	1	0	Non-neutral	0	Deleterious	0.87
11	5602444	C	T	14.11	0.23	0.34937	0.624306	0.994319	2	Neutral	0.00692617	Neutral	1	Possibly damaging	0.992	0.01	Non-neutral	2	Deleterious	0.76
20	10030767	C	T	21.9	0.49	0.97399	0.659464	0.999023	2	Deleterious	0.228014	Neutral	0	Benign	1	0	Neutral	0	Neutral	0.6
3	185978295	G	A	32	0.234183	0.94277	0.547309	0.995676	3	Deleterious	0.274762	Disease	8	Possibly damaging	0.928	0.19	Neutral	3	Neutral	0.6
6	101075830	A	G	28.6	0.45	0.99144	0.709663	0.999065	2	Deleterious	0.182307	Disease	3	Possibly damaging	0.888	0.01	Non-neutral	0	Deleterious	0.65
20	47685331	C	T	23.6	0.26	0.98169	0.702456	0.996104	3	Deleterious	0.378995	Neutral	1	Benign	0.992	0.13	Neutral	7	Neutral	0.75
1	214557039	G	A	7.805	0.47	0.36742	0.724815	0.822701	2	Neutral	0.03987	Neutral	8	Benign	1	0.31	Neutral	2	Neutral	0.63
15	40591423	C	T	19.51	0.4	0.54766	0.658983	0.982593	3	Deleterious	0.707576	Neutral	4	Benign	0.984	0.42	Neutral	7	Neutral	0.74
16	67865957	G	C	1.94	0.42	0.0861	0.709663	0.98299	2	Neutral	0.0055444	Neutral	7	Benign	0.984	0.06	Non-neutral	1	Deleterious	0.55
17	48452987	C	G	10.49	0.26	0.15702	0.658983	0.735248	2	Neutral	0.0681923	Neutral	7	Benign	0.278	0.1	Neutral	4	Neutral	0.74
13	45523871	T	A	32	0.51	0.92126	0.658983	0.99328	3	Neutral	0.00937109	Neutral	4	Possibly damaging	0.974	0	Neutral	0	Deleterious	0.61
5	125887777	C	T	13.55	0.26	0.35026	0.724815	0.841714	2	Deleterious	0.669092	Neutral	4	Benign	0.996	0.62	Neutral	3	Neutral	0.75
12	9318777	C	T	0.002	0.41	0.01621	0.547309	0.414627	1	Neutral	0.00323368	Neutral	8	Benign	0.976	0.5	Neutral	7	Neutral	0.65
20	61444697	G	C	0.371	0.22	0.00545	0.645312	0.38691	1	Deleterious	0.923157	Neutral	8	Benign	0.952	0.69	Neutral	1	Neutral	0.74
1	157557798	C	T	1.698	0.17	0.04682	0.547309	0.677927	2	Neutral	0.0966074	Disease	7	Benign	0.912	0.44	Neutral	1	Neutral	0.6
16	23079890	G	A	21.8	0.5	0.97432	0.608884	0.999163	3	Neutral	0.038959	Neutral	8	Possibly damaging	0.916	0.04	Neutral	0	Deleterious	0.52
1	220315224	C	T	20.9	0.46	0.96436	0.743671	0.999314	3	Neutral	0.0244203	Neutral	0	Benign	0.3	0	Neutral	0	Deleterious	0.51
13	99948383	G	T	13.23	0.25	0.0674	0.547309	0.715078	2	Deleterious	0.131667	Neutral	0	Benign	0.958	0.93	Neutral	4	Neutral	0.74
15	72456035	G	A	10.12	0.48	0.55676	0.602189	0.969132	3	Deleterious	0.39973	Neutral	6	Benign	0.67	0.33	Neutral	5	Neutral	0.74
11	56043535	C	A	25.1	0.25	0.96849	0.547309	0.996294	3	Neutral	5.3452e-05	Disease	4	Benign	1	0	Non-neutral	3	Deleterious	0.87
2	68753283	C	T	10.09	0.38	0.59211	0.658983	0.971866	3	Neutral	0.0560867	Neutral	8	Benign	0.804	0.24	Neutral	4	Neutral	0.71
17	74382586	C	A	22.6	0.52	0.98753	0.691665	0.993449	4	Deleterious	0.155963	Disease	3	Possibly damaging	0.526	0.01	Neutral	0	Deleterious	0.55
6	139564297	G	A	13.54	0.46	0.44665	0.547309	0.997751	2	Deleterious	0.759606	Neutral	8	Benign	0.948	0.02	Neutral	0	Neutral	0.6
8	139601645	G	A	22.6	0.35	0.9924	0.618467	0.991992	3	Deleterious	0.653669	Disease	2	Benign	1	0.12	Neutral	6	Neutral	0.6
11	5842404	C	G	10.25	0.23	0.27258	0.618467	0.995523	2	Deleterious	0.67945	Neutral	6	Benign	0.768	0.01	Neutral	0	Neutral	0.65
15	86808051	G	A	35	0.2	0.98807	0.547309	0.999519	2	Deleterious	0.836939	Neutral	2	Benign	1	0	Non-neutral	2	Deleterious	0.51
1	108700087	C	A	23.8	0.36	0.99287	0.709663	0.995212	3	Deleterious	0.229466	Disease	2	Benign	0.996	0.03	Non-neutral	1	Deleterious	0.55
15	69727837	C	T	18.22	0.7	0.98332	0.724815	0.998294	4	Neutral	2.99772e-06	Disease	6	Benign	1	0	Non-neutral	1	Deleterious	0.87
4	96761326	G	A	14.19	0.29	0.3895	0.48864	0.985598	3	Deleterious	0.114001	Neutral	7	Benign	0.724	0.14	Non-neutral	2	Neutral	0.65
20	44236765	G	A	15.11	0.37	0.02644	0.573888	0.940847	1	Neutral	0.0356929	Neutral	9	Possibly damaging	0.146	0.14	Non-neutral	1	Neutral	0.6
19	51022639	G	T	19.34	0.59	0.89779	0.723109	0.960966	2	Deleterious	0.99744	Neutral	0	Benign	0.996	0.15	Neutral	5	Neutral	0.75
17	8791611	C	T	16.24	0.37	0.08063	0.691665	0.931216	4	Deleterious	0.923292	Neutral	9	Benign	0.996	0.91	Neutral	0	Neutral	0.74
8	124359406	A	G	14.73	0.52	0.99762	0.724815	0.985831	4	Deleterious	0.373333	Neutral	5	Benign	0.67	0.02	Neutral	3	Neutral	0.68
19	45445539	C	T	11.36	0.5	0.00248	0.578056	0.982859	1	Deleterious	0.587464	Neutral	7	Benign	0.852	0.23	Neutral	1	Neutral	0.63
6	71234175	G	A	20.4	0.56	0.91564	0.65145	0.846045	4	Deleterious	0.165419	Neutral	7	Benign	0.876	0.61	Non-neutral	1	Neutral	0.65
9	121929550	G	A	35	0.48	0.94774	0.709663	0.99902	2	Neutral	1.77384e-05	Neutral	0	Benign	1	0	Non-neutral	2	Deleterious	0.79
7	150921024	C	T	19.88	0.55	0.95952	0.67197	0.998642	4	Deleterious	0.387393	Neutral	0	Benign	0.736	0.16	Neutral	2	Neutral	0.74
2	61297561	C	T	20.6	0.53	0.75107	0.709663	0.387989	3	Deleterious	0.921398	Neutral	10	Benign	0.988	0.97	Neutral	6	Neutral	0.74
7	134878080	G	A	17.92	0.38	0.91814	0.709663	0.998081	3	Neutral	0.0332823	Neutral	3	Benign	0.716	0.05	Non-neutral	2	Deleterious	0.61
7	15666531	C	T	27	0.4	0.9968	0.573888	0.993249	3	Deleterious	0.313529	Neutral	1	Possibly damaging	0.944	0.01	Neutral	3	Neutral	0.6
19	45781188	G	A	32	0.66	0.99152	0.723109	0.999404	4	Deleterious	0.471658	Disease	6	Possibly damaging	1	0	Non-neutral	0	Deleterious	0.72
16	72184517	A	G	15.15	0.32	0.15533	0.657636	0.967377	3	Deleterious	0.587522	Neutral	4	Possibly damaging	0.268	0.03	Non-neutral	0	Neutral	0.6
7	26224928	G	A	21.7	0.36	0.08928	0.697927	0.999332	3	Deleterious	0.57606	Disease	7	Benign	0.994	0	Neutral	2	Deleterious	0.51
12	95922612	C	T	28.8	0.45	0.96782	0.732669	0.997793	2	Deleterious	0.150433	Disease	4	Benign	0.952	0.07	Neutral	1	Neutral	0.63
4	75937790	C	T	3.154	0.12	0.02423	0.653264	0.467937	1	Deleterious	0.175572	Neutral	9	Benign	0.998	0.18	Neutral	5	Neutral	0.75
4	74608172	G	T	6.076	0.34	0.41329	0.573888	0.948309	2	Deleterious	0.528755	Neutral	7	Benign	0.828	0.16	Neutral	1	Neutral	0.74
1	23520183	C	T	29.5	0.45	0.9365	0.709663	0.99951	3	Deleterious	0.505419	Neutral	4	Possibly damaging	0.834	0.01	Non-neutral	1	Deleterious	0.55
17	79517647	C	G	2.233	0.34	0.90086	0.723109	0.97419	1	Deleterious	0.337049	Neutral	6	Benign	0.98	0.08	Neutral	4	Neutral	0.74
4	82125844	C	T	23.1	0.28	0.97508	0.573888	0.995106	3	Deleterious	0.300938	Neutral	8	Benign	0.736	0.52	Neutral	3	Neutral	0.74
10	113941536	C	T	23.8	0.57	0.96426	0.743671	0.99843	2	Deleterious	0.208081	Neutral	8	Possibly damaging	0.09	1	Non-neutral	0	Neutral	0.65
8	40554791	C	T	31	0.39	0.97752	0.709663	0.999287	2	Deleterious	0.146798	Neutral	0	Possibly damaging	0.796	0.02	Non-neutral	2	Deleterious	0.61
1	206784623	T	C	23.1	0.37	0.89344	0.662677	0.988274	3	Deleterious	0.841092	Neutral	4	Benign	0.568	0.01	Neutral	3	Neutral	0.65
5	44305146	C	T	29.9	0.39	0.98687	0.573888	0.998893	3	Deleterious	0.581482	Neutral	2	Benign	0.372	0.08	Non-neutral	2	Neutral	0.75
20	30671834	G	C	19.89	0.4	0.25556	0.658983	0.963123	3	Deleterious	0.781843	Neutral	3	Benign	1	0.06	Neutral	5	Neutral	0.75
19	58048626	C	T	1.207	0.44	0.00167	0.608884	0.346057	1	Deleterious	0.943084	Neutral	9	Benign	1	1	Neutral	6	Neutral	0.75
6	31516015	C	T	22.4	0.2	0.55718	0.672317	0.999106	3	Deleterious	0.185142	Neutral	6	Benign	1	0.04	Neutral	0	Deleterious	0.51
9	123917081	G	A	18.67	0.38	0.94592	0.658983	0.999261	2	Deleterious	0.942222	Neutral	8	Possibly damaging	0.994	0.02	Neutral	0	Neutral	0.6
4	184629671	C	T	21.8	0.2	0.98811	0.724815	0.998399	2	Deleterious	0.758263	Neutral	5	Benign	0.424	0.02	Neutral	0	Neutral	0.74
20	45131154	C	T	9.587	0.41	0.00153	0.724815	0.971508	2	Deleterious	0.8833	Disease	2	Benign	0.67	0.19	Neutral	5	Neutral	0.68
13	95818560	G	T	27	0.52	0.9888	0.658983	0.986308	3	Neutral	0.0726298	Disease	0	Possibly damaging	0.584	0	Neutral	6	Deleterious	0.64
15	34649679	G	A	17.14	0.4	0.56203	0.670488	0.998646	2	Neutral	0.0120626	Neutral	9	Benign	0.012	0.51	Non-neutral	1	Neutral	0.65
1	162368789	T	C	0.001	0.24	0.03147	0.475579	0.111855	1	Neutral	0.0425318	Neutral	6	Benign	1	0.47	Neutral	6	Neutral	0.63
3	48609570	C	T	25.7	0.6	0.26852	0.723109	0.988512	3	Deleterious	0.954157	Neutral	5	Possibly damaging	1	0.26	Neutral	4	Neutral	0.63
2	71748026	G	A	30	0.37	0.9822	0.658983	0.999012	3	Deleterious	0.75098	Neutral	5	Benign	0.32	0.06	Non-neutral	0	Neutral	0.74
14	45633577	C	T	35	0.56	0.96962	0.65145	0.999277	3	Neutral	0.0010398	Disease	7	Benign	0.98	0.05	Non-neutral	2	Deleterious	0.87
14	89061267	A	G	17.85	0.68	0.60187	0.54472	0.969629	3	Deleterious	0.129415	Disease	3	Benign	0.962	0.23	Neutral	6	Neutral	0.65
12	52756254	C	T	16.7	0.44	0.91057	0.600433	0.991428	3	Deleterious	0.92603	Disease	2	Benign	0.986	0.11	Neutral	6	Neutral	0.65
1	248367150	C	T	5.046	0.2	0.01329	0.573888	0.69644	2	Deleterious	0.103521	Disease	6	Possibly damaging	0.964	0.1	Non-neutral	3	Deleterious	0.61
11	47510463	A	G	22.2	0.55	0.99198	0	0.99901	3	Neutral	0.000204148	Disease	8	Benign	0.994	0	Non-neutral	3	Deleterious	0.87
19	23836410	T	C	21.9	0.56	0.51562	0.724815	0.967527	1	Neutral	0.000336328	Neutral	3	Benign	1	0	Non-neutral	4	Deleterious	0.76
6	90642261	C	G	16.52	0.35	0.99155	0.602189	0.990041	3	Neutral	5.8077e-06	Neutral	7	Possibly damaging	0.42	0.12	Non-neutral	0	Neutral	0.6
20	49626686	G	A	13.95	0.5	0.99113	0.570548	0.997663	3	Neutral	0.0981082	Disease	6	Benign	0.588	0.05	Non-neutral	0	Deleterious	0.76
15	86312204	C	A	22	0.4	0.99109	0.732669	0.97813	4	Deleterious	0.29344	Neutral	3	Benign	0.962	0.01	Neutral	0	Neutral	0.63
14	24568857	C	T	21.5	0.73	0.8026	0.702456	0.999221	4	Neutral	0.0642213	Neutral	1	Benign	0.954	0.01	Neutral	3	Deleterious	0.61
18	56390406	C	T	16.98	0.61	0.98086	0.709663	0.99917	3	Deleterious	0.296935	Neutral	4	Benign	0.992	0	Neutral	0	Neutral	0.63
10	120095078	G	A	23.5	0.59	0.93156	0.65145	0.977064	2	Neutral	0.000244704	Neutral	5	Benign	0.486	0	Non-neutral	2	Deleterious	0.51
16	31475864	C	T	6.94	0.34	0.0313	0.658983	0.814154	1	Deleterious	0.777283	Neutral	9	Benign	0.942	0.34	Non-neutral	0	Neutral	0.68
15	31206141	C	T	25.1	0.7	0.97065	0.743671	0.998001	3	Deleterious	0.245833	Neutral	4	Possibly damaging	0.99	0.01	Neutral	0	Neutral	0.6
16	28354353	T	G	0.076	0.33	0.00014	0.653264	0.0687092	1	Deleterious	0.99414	Neutral	10	Benign	0.996	1	Neutral	6	Neutral	0.74
10	76797677	G	A	32	0.560889	0.83417	0	0.998981	2	Deleterious	0.117636	Disease	2	Benign	1	0.01	Neutral	2	Deleterious	0.61
2	242147068	G	A	9.54	0.29	0.05809	0.603688	0.66716	1	Deleterious	0.939215	Neutral	8	Benign	0.36	1	Neutral	7	Neutral	0.83
5	167995799	C	T	23.6	0.50866	0.98226	0.732669	0.997172	4	Deleterious	0.989093	Disease	2	Benign	0.508	0.05	Neutral	1	Neutral	0.6
1	186363119	C	G	19.49	0.53	0.18797	0.743671	0.97249	2	Deleterious	0.996362	Neutral	6	Benign	0.996	0.1	Neutral	0	Neutral	0.75
3	52662972	G	A	35	0.64	0.9908	0.743671	0.999321	4	Neutral	0.0436514	Disease	2	Benign	1	0	Non-neutral	0	Deleterious	0.87
9	104133503	G	A	8.495	0.33	0.10232	0.547309	0.981751	2	Neutral	0.0973481	Neutral	5	Benign	0.99	0.02	Non-neutral	0	Deleterious	0.52
5	131055110	C	T	20.6	0.44	0.96615	0.083675	0.964089	4	Deleterious	0.681397	Neutral	6	Possibly damaging	1	0.82	Neutral	4	Neutral	0.63
11	117789345	G	C	0.101	0.08	0.02461	0.547309	0.465702	1	Deleterious	0.234306	Neutral	8	Benign	1	0.2	Neutral	0	Neutral	0.75
1	151060736	C	T	25.9	0.65	0.64147	0.602189	0.998885	4	Deleterious	0.813201	Neutral	6	Benign	0.766	0.08	Neutral	7	Neutral	0.74
3	149459391	G	A	21.2	0.4	0.95432	0.724815	0.997904	3	Deleterious	0.452016	Neutral	9	Benign	0.266	0.17	Neutral	5	Neutral	0.83
19	6374579	C	T	22.4	0.32	0.43862	0.658105	0.997448	3	Neutral	0.0134016	Neutral	3	Benign	0.284	0.07	Neutral	1	Neutral	0.75
5	150578630	C	T	17.37	0.28	0.04277	0.630245	0.997545	2	Neutral	0.05312	Neutral	8	Benign	0.872	0.56	Neutral	1	Neutral	0.68
4	185684398	C	A	22.3	0.53	0.38579	0.658983	0.98932	3	Deleterious	0.554905	Neutral	5	Benign	1	0.08	Neutral	7	Neutral	0.75
2	159530245	A	G	21.8	0.42	0.99508	0.743671	0.998374	3	Deleterious	0.184812	Disease	8	Benign	1	0	Non-neutral	2	Deleterious	0.76
1	245530320	C	T	11.24	0.316247	0.91708	0.624306	0.978836	2	Deleterious	0.198436	Neutral	6	Benign	0.49	0.04	Neutral	0	Neutral	0.74
11	55418468	C	A	18.44	0.21	0.03407	0.573888	0.965274	2	Neutral	0.00469069	Disease	2	Possibly damaging	0.714	0	Non-neutral	0	Deleterious	0.87
19	5866709	G	A	2.298	0.18	0.00392	0.578056	0.146501	1	Deleterious	0.739287	Neutral	1	Benign	0.986	0.55	Neutral	3	Neutral	0.75
3	38047955	C	T	15.75	0.15	0.10535	0.616094	0.998147	3	Deleterious	0.111335	Neutral	2	Benign	0.994	0.02	Neutral	3	Deleterious	0.51
6	128135017	C	T	23.9	0.55	0.92681	0.573888	0.990856	3	Deleterious	0.90679	Neutral	5	Benign	0.236	0.02	Neutral	4	Neutral	0.74
14	54898881	C	T	22.9	0.56	0.96684	0.743671	0.996395	2	Deleterious	0.167618	Neutral	6	Benign	0.888	0.15	Neutral	3	Neutral	0.74
10	99160214	C	T	12.57	0.257	0.20828	0.672317	0.994036	4	Deleterious	0.232536	Neutral	8	Benign	0.996	0.19	Neutral	0	Neutral	0.75
8	99115125	C	T	17.64	0.29	0.69055	0.709663	0.99356	2	Deleterious	0.966932	Neutral	0	Benign	0.71	0.18	Neutral	5	Neutral	0.74
9	86920199	G	A	18.27	0.17	0.10451	0.547309	0.956149	3	Deleterious	0.329448	Neutral	1	Benign	0.972	0.15	Neutral	3	Neutral	0.75
19	7975428	G	A	17.2	0.45	0.84867	0.702456	0.998952	3	Neutral	0.00515595	Disease	1	Benign	1	0	Non-neutral	3	Deleterious	0.87
6	97247344	C	T	21.1	0.49	0.987	0.608884	0.991227	3	Deleterious	0.862628	Disease	4	Benign	0.008	0.04	Neutral	4	Neutral	0.65
10	100481489	C	T	25.8	0.49	0.9294	0.573888	0.99929	3	Deleterious	0.848901	Neutral	4	Possibly damaging	0.906	0.32	Non-neutral	0	Neutral	0.6
6	39824190	T	A	24.5	0.36	0.93771	0.602189	0.990509	2	Deleterious	0.929966	Neutral	4	Benign	0.636	0	Neutral	2	Neutral	0.63
19	15586637	G	A	25.2	0.21	0.87478	0.547309	0.999028	2	Neutral	0.000252414	Neutral	7	Benign	1	0	Non-neutral	3	Deleterious	0.72
14	93125602	C	T	28.6	0.44	0.48878	0.658983	0.99899	3	Neutral	0.0708254	Disease	2	Benign	0.9	0	Neutral	5	Deleterious	0.55
14	25325177	G	A	23.1	0.55	0.98844	0.709663	0.979572	4	Neutral	0.00342847	Neutral	4	Possibly damaging	0.198	0.18	Non-neutral	2	Neutral	0.6
13	52971859	C	T	8.024	0.46	0.36459	0.618467	0.997226	2	Neutral	0.0753096	Disease	0	Benign	0.672	0.08	Neutral	2	Neutral	0.6
20	43530295	G	A	25.7	0.47	0.97458	0.702456	0.999298	4	Neutral	0.0921595	Disease	5	Possibly damaging	0.994	0	Non-neutral	1	Deleterious	0.87
4	101982313	C	G	32	0.51	0.98926	0.709663	0.997771	3	Deleterious	0.693674	Neutral	3	Possibly damaging	0.958	0.02	Non-neutral	2	Deleterious	0.55
1	205768201	G	A	25.5	0.36	0.98505	0.743671	0.999357	3	Neutral	0.0374902	Disease	3	Benign	0.996	0	Neutral	2	Deleterious	0.61
2	29038986	C	T	28	0.53	0.79388	0.602189	0.999359	3	Deleterious	0.220608	Neutral	0	Benign	1	0.03	Neutral	2	Deleterious	0.51
19	47969114	C	T	22.5	0.35	0.81418	0.723109	0.997699	3	Deleterious	0.541643	Neutral	3	Benign	0.276	0.03	Neutral	6	Neutral	0.74
14	77904173	C	G	23	0.47	0.89932	0.709663	0.941166	2	Deleterious	0.994886	Neutral	8	Benign	0.998	0.31	Neutral	6	Neutral	0.74
19	8319474	C	T	21	0.200611	0.02903	0.702456	0.993199	2	Deleterious	0.849084	Neutral	7	Benign	0.882	0.71	Neutral	4	Neutral	0.74
20	23807075	C	T	0.228	0.15	0.00044	0.547309	0.246348	1	Deleterious	0.949828	Neutral	7	Benign	0.998	1	Neutral	5	Neutral	0.74
20	33444618	C	T	22.9	0.65	0.6132	0.743671	0.951665	4	Deleterious	0.452312	Neutral	6	Benign	0.982	0.14	Neutral	7	Neutral	0.74
22	46725343	T	C	12.96	0.45	0.86711	0.724815	0.998343	2	Neutral	0.00172794	Neutral	0	Benign	0.986	0	Non-neutral	1	Deleterious	0.76
2	220080773	C	T	22.6	0.56	0.98635	0.724815	0.998372	3	Neutral	3.79655e-07	Disease	3	Benign	1	0	Non-neutral	5	Deleterious	0.87
4	119652620	G	A	35	0.5	0.96236	0.743671	0.999329	3	Deleterious	0.241277	Disease	4	Benign	1	0	Non-neutral	3	Deleterious	0.76
1	21268692	G	A	18.25	0.76	0.89794	0.724815	0.998581	4	Deleterious	0.953807	Neutral	8	Benign	0.976	0.01	Neutral	4	Neutral	0.65
1	57399055	G	A	26.3	0.4	0.91393	0.547309	0.997935	3	Neutral	0.0734984	Disease	2	Benign	0.518	0.02	Non-neutral	0	Deleterious	0.64
20	31876681	A	G	0.003	0.17	0.05212	0.547309	0.33922	1	Deleterious	0.121244	Neutral	5	Benign	0.968	0.15	Neutral	1	Neutral	0.74
5	72370577	C	T	35	0.299134	0.93473	0.653264	0.999231	2	Deleterious	0.105722	Disease	3	Benign	1	0	Non-neutral	3	Deleterious	0.76
2	100209829	G	T	24.6	0.42	0.99014	0.578056	0.994995	4	Neutral	0.0400838	Neutral	6	Benign	0.492	0.06	Neutral	1	Neutral	0.63
9	35957264	C	T	23	0.13	0.84213	0.563428	0.997924	2	Deleterious	0.942752	Disease	3	Benign	0.902	0.05	Neutral	4	Neutral	0.65
4	42145723	G	A	25.9	0.62	0.99755	0.724815	0.999311	2	Neutral	0.000141995	Neutral	3	Possibly damaging	0.952	0	Non-neutral	0	Deleterious	0.76
11	56043751	T	C	7.411	0.19	0.03647	0.547309	0.892422	2	Neutral	0.000329729	Neutral	6	Benign	0.832	0.47	Non-neutral	1	Neutral	0.6
14	57271061	C	T	22.6	0.31	0.82629	0.694767	0.938288	3	Deleterious	0.545108	Neutral	4	Benign	0.008	1	Neutral	2	Neutral	0.83
1	179090962	T	C	17.11	0.72	0.93538	0.608884	0.999024	4	Deleterious	0.470479	Disease	1	Benign	0.272	0	Non-neutral	2	Deleterious	0.51
8	15601103	G	A	28.5	0.42	0.99035	0.659464	0.999254	3	Deleterious	0.582118	Neutral	2	Benign	0.708	0.22	Neutral	2	Neutral	0.74
22	39148537	T	C	14.08	0.28	0.28068	0.658983	0.93817	2	Deleterious	0.165326	Neutral	7	Benign	0.878	0.07	Neutral	3	Neutral	0.74
19	43243169	G	A	0.007	0.12	0.00232	0.547309	0.808135	1	Deleterious	0.282122	Neutral	4	Benign	0.74	0.04	Non-neutral	1	Neutral	0.6
20	16360254	C	A	23.9	0.47	0.9775	0.658983	0.995093	3	Deleterious	0.313138	Neutral	1	Possibly damaging	0.872	0.08	Neutral	1	Neutral	0.63
16	72057134	G	A	23.3	0.27	0.90907	0.644132	0.997003	2	Deleterious	0.559958	Neutral	7	Benign	0.982	0.06	Neutral	6	Neutral	0.74
1	112999463	C	T	27.9	0.58	0.99536	0.724815	0.998893	4	Neutral	0.0323213	Disease	2	Possibly damaging	0.914	0.01	Non-neutral	0	Deleterious	0.87
11	111896360	T	G	21.4	0.49	0.74058	0.52208	0.98111	3	Neutral	0.00095882	Neutral	4	Possibly damaging	0.856	0.45	Neutral	2	Neutral	0.6
2	61006804	C	T	26.2	0.59	0.98522	0.724815	0.998717	3	Deleterious	0.8267	Neutral	1	Benign	0.774	0.15	Neutral	1	Neutral	0.74
5	175772332	G	A	21.9	0.45	0.84977	0.702456	0.998047	2	Deleterious	0.484449	Neutral	3	Benign	0.16	0.07	Neutral	2	Neutral	0.83
18	21914225	G	A	23.7	0.61	0.89319	0.709663	0.996806	2	Deleterious	0.470151	Neutral	6	Benign	0.394	0.05	Neutral	3	Neutral	0.83
10	85974013	T	G	9.034	0.25	0.85125	0.691665	0.993115	3	Neutral	0.00475185	Neutral	1	Possibly damaging	0.982	0	Neutral	1	Deleterious	0.61
19	45797675	G	T	14.09	0.3	0.53862	0.643519	0.981826	4	Deleterious	0.185752	Neutral	9	Benign	0.998	1	Neutral	6	Neutral	0.74
11	45935385	T	C	26	0.26	0.96847	0.743671	0.996489	2	Neutral	0.00669016	Disease	7	Benign	1	0	Non-neutral	6	Deleterious	0.87
14	74058832	C	T	7.648	0.34	0.06514	0.503968	0.973797	1	Deleterious	0.55737	Neutral	6	Benign	0.886	0.05	Non-neutral	0	Neutral	0.6
10	124591900	G	A	24.8	0.63	0.88652	0.702456	0.998172	2	Deleterious	0.106819	Neutral	2	Possibly damaging	0.982	0.01	Non-neutral	2	Deleterious	0.61
1	162325117	G	A	21.6	0.51	0.97514	0.709663	0.988352	3	Deleterious	0.229254	Neutral	6	Benign	0.974	0.38	Neutral	1	Neutral	0.74
7	17833866	G	A	25.7	0.73	0.99441	0.566861	0.996897	2	Neutral	0.0571777	Disease	1	Benign	0.106	0.08	Neutral	0	Neutral	0.65
8	30701641	C	A	24	0.44	0.04628	0.658983	0.995756	3	Deleterious	0.783895	Neutral	9	Benign	0.99	0.04	Non-neutral	1	Deleterious	0.51
8	99441462	C	T	20.4	0.3	0.92542	0.563428	0.997441	3	Neutral	0.067608	Disease	7	Benign	0.18	0	Neutral	4	Deleterious	0.61
11	59225131	G	A	11.46	0.14	0.23165	0.547309	0.99571	2	Deleterious	0.283652	Neutral	0	Benign	0.278	0.04	Neutral	0	Neutral	0.74
22	32179903	G	A	32	0.69	0.96176	0.743671	0.9994	3	Neutral	0.000354041	Disease	8	Benign	1	0	Non-neutral	6	Deleterious	0.87
20	43566759	C	T	22.4	0.39	0.97773	0.724815	0.99916	2	Neutral	0.0257758	Disease	8	Benign	1	0	Non-neutral	5	Deleterious	0.87
14	71057993	T	G	18.34	0.52	0.45782	0.724815	0.924284	2	Deleterious	0.346598	Neutral	9	Benign	0.986	0.24	Neutral	5	Neutral	0.74
3	37818995	G	C	20.7	0.22	0.98464	0.602189	0.998275	3	Neutral	0.0878715	Neutral	7	Benign	0.232	0.56	Neutral	4	Neutral	0.74
1	35884071	G	A	31	0.62	0.98158	0.724815	0.999554	3	Deleterious	0.878448	Disease	0	Benign	0.998	0.01	Non-neutral	3	Deleterious	0.65
17	7402425	C	T	21.2	0.33	0.96939	0.702456	0.998623	2	Neutral	0.00162412	Disease	6	Benign	1	0	Non-neutral	5	Deleterious	0.87
12	25380276	T	A	22.5	0.38	0.98477	0.709663	0.99594	4	Deleterious	0.0589939	Disease	6	Benign	0.968	0.01	Non-neutral	0	Deleterious	0.65
15	80845054	C	T	22.2	0.38	0.91036	0.709663	0.980758	3	Deleterious	0.837221	Neutral	2	Benign	0.992	0.06	Neutral	3	Neutral	0.75
15	43262760	G	A	18.82	0.63	0.85296	0.658983	0.956059	4	Deleterious	0.67341	Neutral	7	Benign	0.998	0.18	Neutral	5	Neutral	0.75
7	31614192	T	C	22.9	0.51	0.91884	0.573888	0.997588	3	Neutral	0.000381386	Neutral	1	Possibly damaging	0.994	0.2	Neutral	0	Deleterious	0.51
12	111070319	C	T	20.6	0.6	0.96893	0.658983	0.999272	2	Neutral	0.0163276	Neutral	1	Benign	1	0	Non-neutral	1	Deleterious	0.79
3	40275351	A	C	21.3	0.65	0.97572	0.602189	0.998224	3	Neutral	0.000100859	Neutral	3	Benign	0.24	0.03	Neutral	2	Neutral	0.63
3	151105776	G	A	22	0.345617	0.96788	0.616094	0.999388	3	Deleterious	0.892631	Neutral	3	Benign	0.998	0.08	Non-neutral	0	Neutral	0.6
18	21033426	C	T	22.6	0.63	0.59141	0.52208	0.991125	4	Deleterious	0.700041	Neutral	8	Benign	0.992	0.01	Neutral	0	Neutral	0.65
9	138378856	A	G	13.17	0.33	0.08202	0.723109	0.467308	2	Deleterious	1	Neutral	9	Benign	1	1	Neutral	6	Neutral	0.63
6	114378951	T	G	18.93	0.46	0.97779	0.658983	0.92738	3	Deleterious	0.964034	Neutral	6	Benign	0.862	0.54	Neutral	5	Neutral	0.74
8	16963026	G	A	34	0.34	0.98754	0.618467	0.999585	2	Deleterious	0.820721	Neutral	2	Benign	1	0.01	Non-neutral	1	Deleterious	0.61
1	161094125	C	T	19.1	0.58	0.9448	0.724815	0.999547	3	Neutral	0.0835227	Neutral	3	Benign	0.998	0.02	Neutral	0	Deleterious	0.61
21	37537165	A	G	21.6	0.32	0.8955	0.658983	0.74598	3	Deleterious	0.63894	Neutral	7	Benign	0.948	0.16	Neutral	3	Neutral	0.74
20	56089711	C	T	13.91	0.29	0.80617	0.600433	0.998212	3	Neutral	0.0825055	Neutral	5	Benign	0.348	0	Non-neutral	1	Neutral	0.6
10	105361734	C	T	26.6	0.4	0.96309	0.723109	0.998374	2	Neutral	5.25101e-05	Disease	2	Possibly damaging	1	0	Neutral	0	Deleterious	0.76
4	38879949	G	A	15.74	0.15	0.61086	0.709663	0.971985	1	Neutral	0.0750134	Neutral	5	Benign	0.82	0.47	Neutral	4	Neutral	0.71
21	46702334	C	T	21.4	0.21	0.96564	0.643519	0.979515	3	Deleterious	0.980927	Neutral	6	Benign	0.488	0.34	Neutral	2	Neutral	0.83
3	186024722	C	T	9.918	0.2	0.30795	0.573888	0.859914	2	Deleterious	0.810915	Neutral	7	Benign	0.998	0.39	Neutral	5	Neutral	0.75
10	8106058	T	A	22.1	0.27	0.93902	0.606884	0.989586	4	Deleterious	0.121405	Disease	10	Benign	0.75	0	Non-neutral	2	Deleterious	0.61
7	30638491	G	A	22.6	0.48	0.99748	0.643519	0.999461	3	Deleterious	0.729738	Neutral	2	Benign	1	0.01	Non-neutral	2	Deleterious	0.61
19	57724021	C	T	22.6	0.52	0.12669	0.608884	0.994434	2	Deleterious	0.130312	Neutral	6	Benign	0.934	0.01	Neutral	0	Neutral	0.65
1	32100892	G	A	21.1	0.59	0.95697	0.709663	0.995493	3	Deleterious	0.271068	Neutral	3	Benign	0.96	0.27	Neutral	4	Neutral	0.74
10	114182198	C	T	22.2	0.490848	0.97138	0.547309	0.998402	4	Deleterious	0.183273	Disease	3	Benign	0.978	0	Neutral	1	Deleterious	0.51
10	98383249	G	A	22.3	0.42	0.97476	0.602189	0.998391	2	Neutral	0.0274193	Neutral	5	Benign	0.656	0	Non-neutral	1	Deleterious	0.65
15	44092860	G	A	22.8	0.79	0.98968	0.52208	0.999116	4	Deleterious	0.368304	Neutral	5	Possibly damaging	0.994	0.18	Neutral	1	Neutral	0.63
19	19330009	G	A	25.1	0.27	0.98562	0.645312	0.996043	3	Deleterious	0.898368	Neutral	1	Benign	0.894	0.01	Non-neutral	2	Neutral	0.6
3	108076945	G	A	22.2	0.33	0.60026	0.573888	0.954562	2	Deleterious	0.287552	Neutral	8	Benign	0.424	0.27	Neutral	4	Neutral	0.83
22	42805464	T	A	23.7	0.26	0.94624	0.602189	0.992358	2	Neutral	0.0124592	Disease	0	Benign	1	0.44	Non-neutral	2	Deleterious	0.61
12	52714852	C	T	23	0.178936	0.79016	0.615948	0.998402	2	Deleterious	0.620041	Neutral	5	Benign	0.638	0.31	Neutral	5	Neutral	0.75
3	170802051	G	A	33	0.71	0.99008	0.709663	0.999298	3	Deleterious	0.459087	Disease	8	Possibly damaging	0.994	0	Neutral	1	Deleterious	0.61
1	7527959	C	G	24	0.4	0.97518	0.578056	0.98288	4	Deleterious	0.870062	Neutral	1	Benign	0.992	0.19	Non-neutral	2	Neutral	0.63
12	56501002	G	A	21.4	0.34	0.92302	0.575934	0.995963	4	Deleterious	0.123897	Disease	3	Benign	0.91	0.02	Neutral	3	Neutral	0.6
14	32561116	A	G	27.4	0.56	0.98525	0.658983	0.996434	4	Neutral	0.0937168	Neutral	1	Benign	1	0	Non-neutral	2	Deleterious	0.76
14	71205013	G	A	29.9	0.45	0.99602	0.608884	0.999265	3	Deleterious	0.593254	Neutral	6	Possibly damaging	1	0.01	Non-neutral	2	Deleterious	0.55
3	170802910	C	T	2.111	0.43	0.04294	0.709663	0.227084	2	Deleterious	0.285419	Neutral	8	Benign	0.998	1	Neutral	7	Neutral	0.74
1	165513987	T	G	15.56	0.35	0.58091	0.596491	0.99254	1	Neutral	0.00255132	Disease	8	Benign	0.952	0	Neutral	3	Deleterious	0.61
3	57283464	C	T	35	0.73	0.91503	0.709663	0.999358	3	Neutral	0.00194503	Neutral	0	Benign	1	0	Non-neutral	3	Deleterious	0.79
5	55209382	G	A	13.53	0.25	0.061	0.547309	0.898878	2	Deleterious	0.523967	Neutral	4	Benign	0.32	0.68	Neutral	4	Neutral	0.83
7	102668000	G	T	0.076	0.35	0.02536	0.602189	0.5723	1	Deleterious	0.996064	Neutral	9	Benign	0.928	0.09	Neutral	0	Neutral	0.74
17	10358258	C	T	21	0.51	0.98191	0.573888	0.991501	3	Deleterious	0.972372	Disease	4	Benign	0.994	0.03	Neutral	5	Neutral	0.6
7	142636746	A	T	9.968	0.24	0.2224	0	0.993437	1	Neutral	0.018447	Neutral	3	Benign	0.372	0.01	Neutral	1	Neutral	0.63
6	30164453	C	T	23.5	0.53	0.63905	0.724815	0.993775	3	Deleterious	0.772913	Neutral	5	Benign	0.488	1	Neutral	7	Neutral	0.83
10	135440242	C	T	8.888	0.32	0.02995	0.573888	0.805365	1	Deleterious	0.83439	Neutral	9	Benign	0.248	0.46	Neutral	6	Neutral	0.83
18	54398632	T	G	23.2	0.38	0.97335	0.653264	0.988699	3	Neutral	0.0396525	Disease	2	Possibly damaging	0.996	0	Neutral	0	Deleterious	0.76
15	85438332	C	T	5.966	0.22	0.02823	0.48864	0.733011	2	Deleterious	0.652019	Neutral	1	Benign	0.968	0.3	Neutral	1	Neutral	0.74
4	111397641	C	T	16.51	0.34	0.11978	0.527494	0.996675	2	Deleterious	0.156751	Neutral	6	Benign	0.836	0.22	Neutral	0	Neutral	0.74
7	106508499	G	A	14.82	0.28	0.87194	0.573888	0.841519	3	Deleterious	0.982938	Neutral	7	Benign	0.998	0.8	Neutral	6	Neutral	0.74
5	168119658	G	A	28.3	0.36	0.99157	0.653264	0.998873	3	Deleterious	0.576409	Neutral	2	Benign	0.994	0	Neutral	0	Deleterious	0.51
2	230661464	C	T	24.7	0.73	0.95523	0.743671	0.999171	4	Deleterious	0.919872	Neutral	5	Benign	0.886	0.03	Non-neutral	2	Deleterious	0.55
15	42737093	G	C	16.82	0.6	0.87947	0.743671	0.997136	2	Deleterious	0.585728	Neutral	9	Benign	0.076	0.27	Neutral	6	Neutral	0.83
1	152127983	T	A	1.208	0.29	0.06307	0.573888	0.881049	1	Deleterious	0.583347	Neutral	5	Benign	0.898	0.49	Neutral	3	Neutral	0.74
9	108370117	T	C	22.7	0.5	0.85953	0.653264	0.99107	3	Deleterious	0.152671	Neutral	7	Benign	0.972	0.06	Neutral	5	Neutral	0.74
2	102793014	C	T	20.2	0.35	0.95746	0.547309	0.999194	3	Deleterious	0.205576	Disease	6	Possibly damaging	0.994	0	Non-neutral	0	Deleterious	0.72
8	107782406	C	T	14.7	0.2	0.76599	0.573888	0.998734	3	Deleterious	0.419808	Neutral	8	Benign	0.89	0.01	Neutral	4	Neutral	0.68
19	45867687	T	C	25	0.2	0.94178	0.723109	0.998817	4	Neutral	0.000174891	Disease	9	Benign	0.998	0	Non-neutral	1	Deleterious	0.87
12	47629954	G	A	0.891	0.45	0.05017	0.658983	0.755491	1	Deleterious	0.410904	Neutral	1	Possibly damaging	0.316	0.33	Neutral	0	Neutral	0.75
18	7949192	G	A	15.69	0.34	0.84461	0.658983	0.957258	2	Deleterious	0.982323	Neutral	7	Benign	0.816	0.18	Non-neutral	1	Neutral	0.65
3	47460867	G	A	33	0.617372	0.9223	0.702456	0.99931	3	Deleterious	0.484436	Disease	1	Benign	1	0.01	Neutral	0	Deleterious	0.61
22	32112546	G	A	9.428	0.3	0.05129	0.608884	0.254	1	Deleterious	0.716863	Neutral	6	Benign	1	0.15	Neutral	4	Neutral	0.75
15	88679165	C	G	26.2	0.42	0.99143	0.658983	0.998224	4	Deleterious	0.140212	Disease	7	Possibly damaging	0.998	0	Neutral	0	Deleterious	0.61
1	248813785	A	T	10.92	0.24	0.0399	0.573888	0.935577	1	Neutral	1.88512e-06	Neutral	1	Possibly damaging	0.982	0.01	Non-neutral	4	Deleterious	0.76
1	247978712	G	A	3.659	0.21	0.00761	0.573888	0.537497	1	Deleterious	0.34548	Neutral	5	Possibly damaging	0.97	0.65	Neutral	2	Neutral	0.65
14	20822308	A	G	26.1	0.5	0.96985	0.724815	0.996359	3	Deleterious	0.215388	Neutral	5	Possibly damaging	0.178	0.04	Neutral	1	Neutral	0.65
4	36150095	C	T	34	0.47	0.95385	0.573888	0.999275	3	Deleterious	0.881861	Disease	3	Possibly damaging	1	0.04	Neutral	3	Deleterious	0.55
6	29408313	C	A	2.4	0.17	0.00198	0.547309	0.668665	1	Deleterious	0.664208	Neutral	7	Benign	0.998	0.07	Non-neutral	0	Neutral	0.63
1	25167282	C	T	34	0.68	0.97829	0.702456	0.99923	3	Neutral	0.000919205	Disease	8	Benign	0.982	0.06	Neutral	2	Deleterious	0.51
18	32455230	T	C	23	0.43	0.99062	0.653264	0.998859	4	Neutral	1.28865e-06	Neutral	1	Benign	0.756	0	Non-neutral	1	Deleterious	0.61
11	20101690	A	C	19.09	0.39	0.94588	0.724815	0.997308	3	Neutral	0.00108406	Neutral	8	Benign	0.982	0	Non-neutral	0	Deleterious	0.65
10	27499923	G	A	17.38	0.34	0.79493	0.724815	0.87681	1	Deleterious	0.251221	Neutral	8	Benign	1	0.12	Neutral	1	Neutral	0.75
2	220432115	C	T	17.51	0.280059	0.51317	0.702456	0.998931	2	Neutral	0.000743309	Disease	7	Benign	0.994	0.19	Non-neutral	1	Deleterious	0.72
2	175337838	C	T	19.98	0.45	0.29368	0.573888	0.975153	3	Deleterious	0.938313	Neutral	8	Benign	0.998	0.24	Neutral	5	Neutral	0.74
3	50334626	C	T	21.9	0.5	0.96646	0.723109	0.99957	2	Neutral	0.000115449	Neutral	5	Benign	1	0	Non-neutral	4	Deleterious	0.76
2	211471539	G	A	34	0.37	0.97437	0.653264	0.999466	3	Deleterious	0.341111	Disease	9	Possibly damaging	1	0	Neutral	0	Deleterious	0.61
1	54238156	C	T	22.7	0.61	0.98017	0.724815	0.998694	2	Neutral	0.01254	Neutral	4	Possibly damaging	0.514	0.05	Neutral	4	Deleterious	0.52
1	169562858	G	A	25.2	0.43	0.33069	0.547309	0.998894	2	Neutral	0.0810772	Disease	3	Benign	0.976	0	Non-neutral	0	Deleterious	0.87
17	17250250	C	T	33	0.210428	0.95506	0.723109	0.999154	2	Neutral	0.0835774	Neutral	6	Benign	1	0	Non-neutral	4	Deleterious	0.72
9	32487509	A	T	22.2	0.38	0.58545	0.608884	0.993049	3	Deleterious	0.696664	Neutral	3	Benign	0.976	0.01	Neutral	1	Neutral	0.63
17	7365821	G	A	17.77	0.59	0.96901	0.723109	0.998262	3	Neutral	0.0494922	Neutral	3	Benign	0.99	0	Non-neutral	2	Deleterious	0.76
2	237074648	C	T	22.7	0.57	0.95368	0.673471	0.999179	2	Deleterious	0.929617	Disease	1	Benign	0.234	0.01	Neutral	3	Neutral	0.65
1	227333303	T	A	23.6	0.54	0.7888	0.659464	0.992906	2	Neutral	0.0970077	Neutral	5	Benign	0.952	0.02	Neutral	3	Neutral	0.6
2	183699692	G	A	35	0.23	0.97413	0.060301	0.999303	2	Neutral	0.0345964	Neutral	2	Benign	1	0	Non-neutral	4	Deleterious	0.76
14	25102253	C	T	15.82	0.18	0.96808	0.573888	0.996793	3	Neutral	0.00188671	Disease	8	Benign	1	0	Non-neutral	5	Deleterious	0.87
4	72338593	G	T	17.11	0.73	0.97328	0.573888	0.998539	3	Deleterious	0.995508	Disease	5	Benign	0.996	0.14	Neutral	3	Neutral	0.63
7	106508257	C	T	7.352	0.41	0.21526	0.573888	0.224697	4	Deleterious	0.13877	Neutral	7	Benign	0.998	0.65	Neutral	6	Neutral	0.75
19	54483252	G	A	22.9	0.48	0.95245	0.519653	0.998991	2	Neutral	0.000753278	Disease	2	Benign	0.988	0	Non-neutral	2	Deleterious	0.72
8	12286498	G	C	5.3	0.18	0.64842	0.709663	0.977699	2	Deleterious	0.643076	Disease	2	Benign	0.174	0.01	Neutral	0	Neutral	0.63
3	52456816	G	A	34	0.39	0.92979	0.608075	0.999365	3	Neutral	1.09302e-05	Disease	7	Benign	1	0	Non-neutral	5	Deleterious	0.87
12	57000448	C	T	25.4	0.59	0.88884	0.724815	0.999007	3	Deleterious	0.990255	Neutral	8	Possibly damaging	0.994	0.39	Non-neutral	0	Neutral	0.6
10	27702272	C	T	23.6	0.2	0.57249	0.573888	0.995213	2	Neutral	0.0170518	Disease	4	Benign	0.998	0	Non-neutral	5	Deleterious	0.87
11	66616472	C	A	22.3	0.64	0.91351	0.643519	0.994483	3	Neutral	0.0164098	Disease	5	Possibly damaging	0.724	0	Non-neutral	2	Deleterious	0.87
4	146463845	G	A	22.9	0.59	0.99811	0.709663	0.96741	4	Neutral	0.0900655	Neutral	9	Benign	1	0.86	Neutral	2	Neutral	0.65
4	74477518	C	T	0.002	0.48	0.00444	0.547309	0.732483	1	Deleterious	0.973916	Neutral	7	Benign	1	0.02	Neutral	2	Neutral	0.63
16	15457644	C	G	2.504	0.275516	0.00024	0.659464	0.537211	1	Deleterious	0.854941	Neutral	6	Benign	1	1	Neutral	7	Neutral	0.75
12	53823694	G	A	17.95	0.28	0.55203	0.547309	0.274685	2	Deleterious	0.614952	Disease	3	Benign	0.966	1	Neutral	5	Neutral	0.65
8	42275478	G	A	35	0.32	0.99155	0.743671	0.999321	3	Deleterious	0.00529004	Neutral	0	Possibly damaging	1	0	Neutral	0	Deleterious	0.61
16	1413039	G	A	4.226	0.35	0.06641	0.702456	0.43872	3	Neutral	0.0218754	Neutral	8	Benign	0.992	0.54	Neutral	7	Neutral	0.65
1	166973437	C	T	22.3	0.42	0.90196	0.573888	0.998886	2	Neutral	0.0132149	Neutral	6	Benign	1	0	Non-neutral	3	Deleterious	0.72
17	38612791	G	T	34	0.63	0.98741	0.723133	0.996248	3	Neutral	0.00991776	Disease	6	Benign	1	0	Non-neutral	3	Deleterious	0.87
21	41143007	G	A	17.77	0.27	0.05976	0.653264	0.994237	2	Deleterious	0.673244	Neutral	9	Benign	0.672	0.37	Neutral	4	Neutral	0.75
5	79284386	T	A	22.6	0.66	0.98299	0.724815	0.992032	2	Neutral	0.0124708	Disease	1	Benign	0.982	0	Non-neutral	0	Deleterious	0.87
1	165514029	G	T	13.77	0.4	0.92562	0.596491	0.993863	2	Deleterious	0.134263	Neutral	0	Benign	0.884	0.01	Neutral	0	Deleterious	0.51
8	145140316	A	G	22.2	0.43	0.98748	0.697927	0.99918	2	Deleterious	0.746154	Neutral	4	Possibly damaging	0.362	0.53	Neutral	1	Neutral	0.75
3	10183614	A	G	2.922	0.35	0.10503	0.52208	0.539801	3	Deleterious	0.556751	Neutral	8	Benign	1	0.76	Neutral	2	Neutral	0.75
1	43814979	G	A	15.85	0.42	0.6711	0	0.991529	3	Deleterious	0.000216314	Neutral	6	Benign	0.996	0.13	Neutral	5	Neutral	0.63
8	99441436	T	C	20.9	0.31	0.98363	0.563428	0.998395	3	Deleterious	0.989592	Neutral	1	Possibly damaging	0.87	0	Non-neutral	0	Deleterious	0.61
11	66618280	C	G	22.3	0.65	0.96144	0.489635	0.997697	3	Deleterious	0.824414	Neutral	4	Benign	0.998	0.04	Neutral	5	Neutral	0.65
12	27113500	G	A	22.9	0.58	0.6391	0.80507	0.995155	4	Deleterious	0.379266	Neutral	6	Possibly damaging	0.874	0.02	Neutral	2	Neutral	0.6
5	147928256	G	A	28.3	0.25	0.99025	0.573888	0.998298	4	Deleterious	0.268116	Disease	0	Benign	0.994	0	Non-neutral	2	Deleterious	0.72
10	124598640	G	A	25.2	0.79	0.78857	0.743671	0.998405	2	Deleterious	0.280643	Disease	4	Benign	0.236	0	Non-neutral	0	Deleterious	0.51
19	42489240	C	T	29.7	0.38	0.94006	0.723109	0.999239	3	Neutral	0.087663	Disease	3	Benign	0.058	0	Neutral	6	Neutral	0.6
4	156638441	G	A	32	0.49	0.99778	0.618467	0.997343	3	Neutral	0.034561	Disease	7	Benign	0.548	0	Neutral	0	Deleterious	0.61
22	24086127	G	A	17.41	0.23	0.26184	0.658983	0.999028	3	Deleterious	0.185622	Neutral	5	Benign	0.514	0.02	Non-neutral	2	Deleterious	0.55
5	154393562	C	T	24.7	0.2	0.15243	0.643519	0.997155	1	Deleterious	0.549651	Disease	2	Benign	0.206	0	Non-neutral	1	Deleterious	0.61
15	66416238	G	A	33	0.55	0.77797	0.658983	0.999156	3	Neutral	0.0844144	Disease	8	Benign	1	0	Non-neutral	2	Deleterious	0.87
6	158900963	C	T	35	0.67	0.98625	0.608884	0.999408	3	Neutral	0.0117248	Neutral	1	Benign	0.996	0	Non-neutral	4	Deleterious	0.79
1	89448410	C	T	19.18	0.27	0.62556	0.702456	0.981904	1	Deleterious	0.193816	Neutral	8	Possibly damaging	0.894	0.37	Neutral	2	Neutral	0.65
19	41726562	C	T	12.85	0.38	0.84055	0.594344	0.997445	3	Deleterious	0.371097	Neutral	8	Benign	0.96	0.1	Neutral	4	Neutral	0.63
1	19166953	G	A	27.5	0.21	0.45397	0.573888	0.99918	2	Neutral	0.0173094	Disease	7	Benign	1	0	Non-neutral	3	Deleterious	0.87
6	30128272	G	A	11.93	0.180555	0.30367	0.59043	0.998828	3	Deleterious	0.257698	Disease	3	Benign	1	0.02	Non-neutral	2	Deleterious	0.72
2	163059615	G	A	33	0.65	0.95092	0.573888	0.999177	3	Deleterious	0.333012	Neutral	2	Benign	0.518	0	Neutral	2	Neutral	0.63
2	103061795	G	A	10.83	0.17	0.01374	0.573888	0.727287	2	Deleterious	0.701593	Neutral	9	Benign	1	1	Neutral	6	Neutral	0.75
12	102307953	G	T	23.1	0.4	0.97037	0.658983	0.881369	2	Deleterious	0.462567	Neutral	2	Benign	0.994	0.03	Neutral	2	Neutral	0.63
19	55831498	C	T	19.52	0.35	0.40602	0.503968	0.999204	2	Deleterious	0.96501	Neutral	6	Benign	0.066	0.04	Neutral	2	Neutral	0.74
8	15531294	C	A	24.6	0.47	0.74161	0.659464	0.996281	2	Neutral	5.84113e-06	Disease	9	Benign	0.988	0	Non-neutral	6	Deleterious	0.87
3	186839028	G	A	14.45	0.4	0.06699	0.743671	0.91319	2	Neutral	0.0116165	Disease	3	Benign	0.74	0.16	Non-neutral	2	Deleterious	0.55
6	24403399	G	A	10.15	0.33	0.0155	0.52208	0.986628	1	Deleterious	0.546514	Neutral	7	Possibly damaging	0.886	0.12	Non-neutral	2	Neutral	0.6
5	130764831	G	A	29.3	0.58	0.98723	0.743671	0.99879	3	Neutral	0.0487405	Neutral	5	Benign	0.808	0.02	Non-neutral	1	Deleterious	0.65
9	131589401	C	T	22.5	0.49	0.96393	0.702456	0.999493	2	Neutral	0.00838322	Disease	2	Possibly damaging	0.87	0	Neutral	3	Deleterious	0.72
20	31656632	C	G	12.55	0.29	0.06692	0.547309	0.769796	2	Deleterious	0.388575	Neutral	9	Benign	0.638	0.26	Non-neutral	0	Neutral	0.71
11	59629021	A	T	13.87	0.16	0.26984	0.573888	0.94359	2	Deleterious	0.65991	Neutral	5	Possibly damaging	0.608	0.29	Neutral	1	Neutral	0.65
7	102518792	C	T	0.006	0.31	0.0148	0.618467	0.392466	1	Deleterious	0.577324	Neutral	3	Benign	0.998	0.35	Neutral	5	Neutral	0.75
12	55820969	A	C	13.96	0.43	0.11979	0.547309	0.957123	2	Deleterious	0.348634	Neutral	5	Benign	0.656	0	Non-neutral	0	Neutral	0.6
4	72319297	C	G	22.2	0.55	0.93041	0.602189	0.989994	3	Neutral	0.0751073	Disease	4	Benign	0.844	0.3	Neutral	6	Neutral	0.6
11	71942192	C	T	35	0.5	0.96869	0.702456	0.999444	2	Deleterious	0.280378	Neutral	3	Possibly damaging	0.798	0	Neutral	2	Deleterious	0.51
19	55351111	C	T	0.636	0.19	0.00029	0.060301	0.982545	0.353412	Deleterious	0.594754	Neutral	5	Benign	0.998	0	Non-neutral	2	Deleterious	0.51
3	58260420	C	T	33	0.43	0.84788	0.709663	0.998877	3	Deleterious	0.270128	Neutral	3	Benign	0.944	0.17	Non-neutral	3	Deleterious	0.51
6	74155359	G	A	19.54	0.55	0.89041	0.602189	0.996776	2	Deleterious	0.267238	Neutral	2	Benign	0.968	0.1	Neutral	2	Neutral	0.75
12	7173259	C	T	35	0.48	0.92369	0.658983	0.999391	4	Deleterious	0.816983	Disease	7	Benign	0.996	0.01	Non-neutral	4	Deleterious	0.72
2	75094879	C	T	18.2	0.47	0.96052	0.698795	0.999007	2	Neutral	0.000661489	Disease	3	Benign	0.876	0.04	Neutral	4	Deleterious	0.55
16	86602395	C	A	16.96	0.38	0.88761	0.731555	0.762374	4	Deleterious	0.595353	Neutral	6	Benign	0.11	0.68	Non-neutral	2	Neutral	0.75
1	158669500	C	T	0.619	0.21	0.00087	0.573888	0.373756	1	Deleterious	0.785424	Neutral	8	Benign	0.896	0.25	Neutral	6	Neutral	0.74
9	139917195	G	A	8.722	0.34	0.08904	0.459711	0.986697	1	Neutral	5.43469e-07	Neutral	8	Benign	0.698	0.3	Neutral	2	Neutral	0.63
14	24538046	A	G	17.9	0.24	0.69816	0.723109	0.995277	1	Deleterious	0.126489	Neutral	9	Possibly damaging	0.986	0.07	Neutral	1	Neutral	0.63
6	42942740	C	T	17.38	0.25	0.59957	0.743671	0.998027	2	Neutral	3.55958e-06	Neutral	7	Possibly damaging	0.918	0.12	Non-neutral	0	Deleterious	0.55
7	150915205	C	T	27.5	0.32	0.98842	0.724815	0.999187	4	Deleterious	0.302993	Disease	1	Benign	0.462	0.12	Neutral	4	Neutral	0.74
1	159505101	G	A	0.005	0.21	0.05017	0.573888	0.574011	2	Neutral	0.00350913	Disease	6	Possibly damaging	0.432	0.03	Non-neutral	1	Deleterious	0.72
17	67149485	G	C	24.2	0.42	0.96905	0.573888	0.99745	2	Neutral	6.76172e-07	Disease	7	Benign	1	0	Non-neutral	4	Deleterious	0.87
1	169390809	G	A	7.959	0.33	0.16562	0.653264	0.988119	2	Neutral	0.00933415	Neutral	6	Benign	1	0.02	Non-neutral	0	Deleterious	0.65
17	38068632	G	C	11.04	0.29	0.04728	0.743671	0.980604	1	Neutral	0.0768236	Neutral	6	Benign	0.588	0.02	Neutral	1	Neutral	0.61
4	36230939	C	T	29.8	0.6	0.94114	0.618467	0.999325	3	Deleterious	0.931973	Neutral	3	Benign	0.98	0	Neutral	1	Neutral	0.63
12	25398284	C	G	28.2	0.5	0.98468	0.743671	0.998094	4	Neutral	0.140164	Disease	6	Possibly damaging	0.796	0	Neutral	1	Deleterious	0.61
19	14047188	G	A	16.16	0.23	0.91193	0.535252	0.913914	2	Deleterious	0.278038	Disease	2	Possibly damaging	0.126	0.01	Non-neutral	2	Deleterious	0.55
13	21563383	G	A	17.91	0.21	0.8733	0.723109	0.991133	2	Deleterious	0.58497	Neutral	6	Benign	0.548	0.01	Neutral	1	Neutral	0.68
14	105685542	C	T	23.6	0.48	0.58073	0.723109	0.997788	4	Deleterious	0.538437	Neutral	5	Benign	0.78	0.01	Neutral	6	Neutral	0.68
20	45131398	C	T	11.58	0.28	0.00247	0.608884	0.993608	2	Deleterious	0.821409	Neutral	3	Benign	0.924	0.67	Neutral	1	Neutral	0.74
11	61630798	A	C	25.3	0.44	0.9523	0.697927	0.984979	3	Neutral	2.47564e-06	Disease	8	Benign	1	0	Non-neutral	4	Deleterious	0.87
15	101569218	G	T	28.7	0.31	0.98857	0.602189	0.998233	2	Neutral	0.0737798	Neutral	1	Benign	1	0	Non-neutral	1	Deleterious	0.76
17	42483320	C	G	21.8	0.31	0.98823	0.709663	0.974933	3	Deleterious	0.932054	Neutral	9	Benign	0.574	0.01	Neutral	7	Neutral	0.71
10	96534882	G	A	14.44	0.34	0.87812	0.573888	0.99611	2	Neutral	0.0412276	Disease	9	Benign	0.994	0.01	Non-neutral	4	Deleterious	0.87
6	74124393	C	T	15.35	0.38	0.97292	0.547309	0.998934	3	Neutral	2.41227e-06	Disease	8	Benign	1	0	Non-neutral	5	Deleterious	0.87
1	24448010	G	A	7.989	0.31	0.0818	0.547309	0.745588	3	Neutral	0.0316439	Neutral	6	Benign	0.996	0.14	Neutral	3	Neutral	0.63
16	20570759	C	T	24.8	0.52	0.05493	0.547309	0.999127	3	Deleterious	0.856713	Neutral	2	Benign	0.968	0.01	Neutral	5	Neutral	0.65
5	55212752	C	T	22.3	0.16	0.04512	0.547309	0.995206	2	Neutral	0.000327739	Neutral	8	Benign	0.822	0.05	Neutral	3	Neutral	0.6
19	5917945	C	T	22.7	0.51	0.9871	0.724815	0.999548	3	Neutral	0.0294974	Disease	7	Possibly damaging	0.62	0	Neutral	1	Deleterious	0.76
9	99700710	G	A	0.978	0.48	0.00576	0.536957	0.981576	1	Deleterious	0.128124	Neutral	5	Benign	0.936	0.01	Neutral	0	Neutral	0.6
3	48218930	A	C	20.4	0.57	0.83231	0.702456	0.997215	2	Neutral	0.0978724	Neutral	3	Possibly damaging	0.754	0.01	Neutral	1	Deleterious	0.55
19	8464857	C	T	34	0.17	0.83195	0.643519	0.999184	4	Neutral	0.0138798	Disease	1	Benign	1	0	Non-neutral	2	Deleterious	0.87
1	165398092	C	T	26	0.249622	0.93095	0.573888	0.999142	4	Deleterious	0.978094	Neutral	6	Benign	0.942	0.59	Non-neutral	0	Neutral	0.65
22	31485803	G	A	3.36	0.36	0.05101	0.723109	0.781787	1	Deleterious	0.994585	Neutral	9	Benign	0.708	0.55	Neutral	1	Neutral	0.75
15	51772336	C	T	22.1	0.61	0.99588	0.083675	0.999206	3	Deleterious	0.655271	Neutral	0	Possibly damaging	0.888	0	Neutral	2	Deleterious	0.51
17	45473241	G	C	16.11	0.33	0.3231	0.573888	0.983704	1	Deleterious	0.295877	Neutral	8	Possibly damaging	0.982	0.17	Neutral	0	Neutral	0.63
1	47283832	G	T	12.61	0.32	0.94289	0.573888	0.988526	2	Deleterious	0.883954	Neutral	5	Benign	0.418	0.17	Neutral	3	Neutral	0.83
14	20711491	C	T	13.61	0.39	0.02753	0.573888	0.933941	2	Deleterious	0.944804	Neutral	9	Benign	0.994	0.26	Neutral	5	Neutral	0.74
19	7830542	C	T	22.5	0.33	0.00788	0.59043	0.994917	2	Deleterious	0.414099	Neutral	2	Benign	0.996	0	Non-neutral	1	Deleterious	0.61
1	118166299	T	C	25.4	0.3	0.94004	0.602189	0.992016	4	Neutral	5.73854e-06	Disease	8	Benign	0.936	0	Non-neutral	4	Deleterious	0.87
18	32459646	C	T	22.4	0.49	0.97439	0.653264	0.997335	4	Deleterious	0.114036	Disease	3	Possibly damaging	0.628	0	Non-neutral	1	Deleterious	0.72
2	128186241	C	T	0.145	0.34	0.11364	0.658983	0.335661	2	Deleterious	0.784661	Neutral	9	Benign	0.88	0.75	Neutral	6	Neutral	0.74
19	9763815	C	T	11.75	0.45	0.01746	0.536957	0.998821	1	Deleterious	0.243973	Neutral	5	Possibly damaging	1	0	Non-neutral	4	Deleterious	0.61
12	110819677	T	C	23	0.325293	0.98627	0.702456	0.997221	4	Deleterious	0.227457	Neutral	7	Benign	0.982	0.29	Non-neutral	1	Neutral	0.63
4	70596339	T	G	4.301	0.28	0.05182	0.573888	0.806563	2	Deleterious	0.609615	Neutral	7	Benign	1	0.37	Neutral	6	Neutral	0.75
1	247752385	G	A	13.87	0.2	0.00877	0.573888	0.987891	2	Neutral	0.000230206	Disease	3	Possibly damaging	0.534	0.08	Non-neutral	4	Deleterious	0.72
16	53675229	G	A	22.3	0.53	0.31952	0.658983	0.977017	4	Deleterious	0.708221	Neutral	3	Benign	0.776	0.01	Neutral	6	Neutral	0.65
14	105222123	G	A	25.1	0.33	0.91767	0.702456	0.998231	2	Neutral	2.72665e-07	Disease	4	Benign	1	0	Non-neutral	4	Deleterious	0.87
20	20028490	C	G	22.5	0.38	0.99579	0.724815	0.996755	3	Deleterious	0.649204	Disease	1	Benign	0.13	0.01	Neutral	3	Neutral	0.65
12	53165697	C	T	24	0.09	0.53441	0.547309	0.994989	2	Deleterious	0.231211	Disease	0	Benign	0.606	0.02	Neutral	3	Neutral	0.6
6	54805838	G	T	19.47	0.42	0.98215	0.618467	0.962346	3	Deleterious	0.634334	Neutral	4	Benign	1	0	Non-neutral	1	Deleterious	0.61
7	51094356	C	G	13.84	0.33	0.92823	0.643519	0.998013	2	Deleterious	0.874824	Neutral	5	Benign	0.932	0.01	Non-neutral	0	Neutral	0.6
3	133098997	G	A	11.12	0.18	0.06024	0.658983	0.843495	2	Neutral	0.0473117	Neutral	6	Benign	0.98	0.17	Neutral	2	Neutral	0.65
1	203025587	C	T	26.7	0.25	0.91851	0.658983	0.999293	2	Neutral	0.0691513	Disease	3	Possibly damaging	0.488	0	Non-neutral	2	Deleterious	0.72
12	21229393	T	G	21.1	0.32	0.56839	0.573888	0.994043	1	Neutral	0.00427278	Disease	3	Benign	0.994	0.07	Neutral	4	Neutral	0.6
2	238990350	C	T	19.78	0.41	0.83801	0.743671	0.989652	1	Deleterious	0.112218	Neutral	6	Possibly damaging	0.99	0.02	Neutral	3	Neutral	0.6
22	26168458	C	T	0.05	0.14	0.06447	0.547309	0.558111	1	Deleterious	0.123119	Neutral	3	Benign	0.874	0.65	Neutral	0	Neutral	0.74
2	209010572	G	A	23.6	0.17	0.55906	0.491513	0.997431	2	Neutral	0.00101028	Disease	6	Benign	0.814	0	Neutral	1	Deleterious	0.76
3	33866751	A	G	22.5	0.53	0.97043	0.743671	0.995602	3	Neutral	0.00368955	Neutral	8	Benign	0.956	0.02	Neutral	2	Neutral	0.6
9	134458080	C	T	34	0.24	0.98419	0.743671	0.999222	3	Deleterious	0.875558	Neutral	3	Benign	0.782	0.01	Neutral	1	Neutral	0.65
10	87482884	C	T	22.6	0.45	0.09693	0.550215	0.9813	3	Neutral	0.0255273	Disease	2	Benign	0.04	0.08	Neutral	6	Neutral	0.65
13	86368731	C	T	17.48	0.4	0.92606	0.657636	0.662505	2	Deleterious	0.623397	Neutral	9	Benign	0.914	1	Neutral	6	Neutral	0.74
19	43259170	G	A	12.74	0.12	0.00211	0.547309	0.747625	1	Deleterious	0.178534	Disease	8	Possibly damaging	0.928	0.06	Neutral	1	Deleterious	0.51
6	74104858	A	G	6.147	0.29	0.05273	0	0.661134	2	Deleterious	0.409696	Neutral	8	Benign	0.968	0.37	Neutral	0	Neutral	0.74
12	110421454	T	C	26.2	0.62	0.94359	0.724815	0.998862	4	Deleterious	0.230077	Disease	1	Benign	0.896	0	Non-neutral	0	Deleterious	0.55
7	143771818	G	A	11.92	0.29	0.35727	0.547309	0.988079	2	Neutral	0.0797589	Neutral	3	Benign	0.87	0.01	Non-neutral	1	Deleterious	0.55
9	18776928	G	C	21.9	0.32	0.86636	0.597571	0.991126	3	Neutral	0.00144106	Disease	4	Possibly damaging	0.398	0.03	Non-neutral	1	Deleterious	0.72
16	66948130	G	A	0.455	0.28	0.37424	0.48864	0.958195	2	Deleterious	0.544324	Neutral	4	Benign	0.982	0.18	Neutral	1	Neutral	0.74
12	11546911	C	T	0.634	0.23	0.00083	0.063197	0.412714	1	Deleterious	0.152994	Neutral	7	Benign	0.484	0.16	Neutral	2	Neutral	0.83
9	32633044	C	T	19.47	0.44	0.71358	0.602189	0.997705	1	Deleterious	0.740813	Neutral	6	Benign	0.9	0.04	Non-neutral	0	Neutral	0.6
11	66101120	G	A	8.511	0.394803	0.04206	0.645312	0.968049	3	Deleterious	0.491093	Neutral	7	Benign	0.812	0.54	Neutral	2	Neutral	0.74
8	124361610	G	A	22.5	0.81	0.99221	0.743671	0.999224	4	Neutral	3.13891e-06	Disease	2	Benign	1	0	Non-neutral	3	Deleterious	0.87
11	22291884	G	A	34	0.71	0.99262	0.653264	0.999588	3	Deleterious	0.852056	Disease	4	Benign	0.826	0.16	Neutral	3	Neutral	0.6
2	71368471	A	G	32	0.8	0.98298	0.724815	0.998295	3	Neutral	0.00014777	Disease	8	Benign	1	0	Non-neutral	2	Deleterious	0.87
6	133015140	G	A	22	0.4	0.92223	0.615948	0.999181	2	Neutral	9.92241e-05	Disease	7	Benign	1	0	Non-neutral	2	Deleterious	0.87
7	99796515	C	T	12.93	0.31	0.45156	0.536957	0.996788	2	Deleterious	0.373301	Disease	1	Possibly damaging	0.728	0	Non-neutral	2	Deleterious	0.65
17	65119099	G	A	34	0.56	0.99115	0.709663	0.989327	2	Deleterious	0.255024	Disease	2	Possibly damaging	0.996	0.25	Neutral	0	Neutral	0.6
19	46351042	C	G	26.4	0.45	0.98719	0.724815	0.996841	3	Neutral	0.0064928	Disease	0	Benign	0.388	0.05	Non-neutral	2	Deleterious	0.51
12	50030600	C	T	22.4	0.61	0.87892	0	0.999319	3	Neutral	0.0011599	Neutral	2	Benign	1	0	Non-neutral	3	Deleterious	0.76
22	46657613	G	A	0.004	0.24	0.01836	0.563428	0.757705	2	Deleterious	0.389114	Neutral	4	Benign	0.058	0.18	Neutral	1	Neutral	0.83
19	8922501	G	A	14.18	0.65	0.00065	0.724815	0.997948	3	Deleterious	0.475036	Neutral	4	Possibly damaging	0.946	0.08	Neutral	0	Neutral	0.63
5	176827280	C	T	17.5	0.45	0.82276	0.578056	0.997359	2	Neutral	0.000135622	Neutral	3	Possibly damaging	0.996	0	Non-neutral	1	Deleterious	0.76
1	203768523	A	G	14.83	0.61	0.85518	0.575934	0.993512	2	Deleterious	0.133343	Neutral	8	Benign	0.152	0.32	Neutral	3	Neutral	0.83
8	141810641	G	A	19.37	0.75	0.99446	0.709663	0.999294	4	Deleterious	0.569283	Neutral	3	Benign	1	0	Non-neutral	2	Deleterious	0.51
1	17708551	G	A	15.2	0.25	0.12062	0.060301	0.84294	0.622787	Deleterious	0.136977	Neutral	6	Benign	0.856	0.07	Non-neutral	2	Neutral	0.63
6	53986293	C	T	27.4	0.62	0.85115	0.547309	0.998915	2	Neutral	3.6472e-05	Neutral	3	Benign	1	0	Neutral	5	Deleterious	0.61
14	50625329	G	A	35	0.66	0.9753	0.653264	0.999326	4	Neutral	0.0248265	Disease	9	Benign	1	0	Non-neutral	4	Deleterious	0.87
20	35282027	G	A	14.53	0.78	0.73702	0.724815	0.377273	3	Deleterious	0.951217	Neutral	5	Benign	0.89	1	Neutral	0	Neutral	0.74
17	10369992	C	T	22	0.53	0.97973	0.573888	0.998881	3	Deleterious	0.93888	Disease	6	Benign	0.148	0.28	Neutral	5	Neutral	0.75
1	53792651	A	C	12.58	0.35	0.04317	0.52208	0.616775	2	Deleterious	0.865823	Neutral	6	Benign	1	0.31	Neutral	7	Neutral	0.75
9	138667205	A	C	23.3	0.43	0.97982	0.576033	0.996574	2	Neutral	0.0236313	Neutral	0	Benign	0.948	0	Neutral	1	Deleterious	0.61
14	104559919	T	C	10.09	0.17	0.00721	0.578056	0.716094	2	Deleterious	0.923757	Disease	1	Possibly damaging	1	1	Neutral	7	Neutral	0.6
9	135926228	C	T	35	0.6	0.98883	0.724815	0.999167	4	Neutral	0.0766254	Disease	4	Benign	1	0	Non-neutral	3	Deleterious	0.87
3	47037248	C	T	19.98	0.582044	0.2227	0.606735	0.965876	2	Deleterious	0.421932	Neutral	8	Benign	0.994	0.6	Neutral	4	Neutral	0.74
4	83838284	C	T	16.16	0.47	0.70872	0.724815	0.991246	3	Deleterious	0.430946	Neutral	9	Possibly damaging	0.652	0.06	Neutral	1	Neutral	0.65
9	125316247	C	T	23.8	0.18	0.04597	0.573888	0.998331	2	Neutral	0.030421	Neutral	4	Benign	0.836	0	Non-neutral	0	Deleterious	0.55
10	135000159	A	G	0.002	0.28	0.00176	0.723109	0.75804	1	Deleterious	0.874601	Neutral	9	Benign	1	0.95	Neutral	4	Neutral	0.75
1	27630228	C	T	35	0.67	0.85151	0.630245	0.999262	3	Deleterious	0.301528	Disease	8	Benign	0.998	0	Non-neutral	2	Deleterious	0.72
11	102661500	G	A	22.3	0.29	0.98335	0.547309	0.998863	3	Neutral	0.00691677	Disease	6	Benign	0.998	0	Non-neutral	1	Deleterious	0.87
14	95669314	G	A	6.022	0.37	0.2944	0.616094	0.993675	3	Neutral	2.46331e-06	Neutral	7	Benign	0.986	0.01	Neutral	3	Neutral	0.6
14	51710663	C	T	22.2	0.39	0.96338	0.662677	0.998514	2	Neutral	0.00342057	Disease	2	Benign	0.948	0.02	Neutral	0	Deleterious	0.61
21	31691749	G	A	22.2	0.22	0.04354	0.573888	0.996077	1	Neutral	0.00196272	Neutral	6	Benign	0.976	0.03	Non-neutral	2	Deleterious	0.65
2	27360809	G	A	5.796	0.21	0.08312	0.578056	0.99256	1	Deleterious	0.217129	Neutral	8	Benign	0.978	0.26	Neutral	1	Neutral	0.74
9	33068845	G	A	35	0.55	0.99373	0.643519	0.998272	3	Deleterious	0.175578	Disease	7	Benign	0.994	0	Neutral	2	Deleterious	0.61
7	2632682	C	T	7.875	0.28	0.04734	0.645312	0.979437	2	Neutral	0.0663204	Neutral	8	Benign	0.788	0.2	Neutral	5	Neutral	0.71
11	57572139	G	T	24.9	0.6	0.99688	0.697927	0.99301	3	Deleterious	0.263857	Neutral	6	Benign	0.388	0.13	Neutral	6	Neutral	0.83
15	66223281	C	T	31	0.81	0.90758	0	0.999203	3	Neutral	0.000166014	Disease	4	Benign	1	0.03	Non-neutral	4	Deleterious	0.87
15	83926472	C	T	16.47	0.5	0.9724	0.658983	0.993401	3	Neutral	0.0962668	Neutral	5	Benign	0.366	0.46	Non-neutral	2	Neutral	0.65
10	96709003	C	G	17.18	0.27	0.48958	0.573888	0.966677	1	Deleterious	0.637115	Neutral	4	Benign	1	0	Neutral	0	Neutral	0.61
15	82555272	G	T	17.05	0.57	0.55638	0	0.983538	3	Neutral	0.0374362	Neutral	4	Benign	1	0.02	Non-neutral	2	Deleterious	0.76
12	48723253	T	A	15.58	0.32	0.96106	0.547309	0.980524	2	Neutral	1.34464e-06	Disease	2	Benign	1	0	Non-neutral	5	Deleterious	0.87
1	150933065	G	A	22.2	0.75	0.66762	0.702456	0.998068	4	Deleterious	0.962514	Neutral	3	Benign	0.748	0.76	Non-neutral	1	Neutral	0.65
3	151078377	T	C	22.1	0.47	0.98391	0.658983	0.997666	3	Deleterious	0.960662	Neutral	4	Benign	0.88	0.68	Neutral	0	Neutral	0.74
11	63961952	G	C	16.92	0.43	0.94732	0.702456	0.99092	3	Deleterious	0.514386	Neutral	7	Benign	0.946	0.39	Neutral	7	Neutral	0.74
10	103190192	G	A	25.2	0.69	0.88803	0.709663	0.99798	3	Deleterious	0.468469	Neutral	4	Possibly damaging	0.998	0.06	Neutral	2	Neutral	0.63
14	57269073	C	T	22.2	0.51	0.97932	0.106797	0.996878	3	Neutral	0.00246924	Disease	5	Possibly damaging	1	0	Non-neutral	0	Deleterious	0.87
7	11632983	C	T	27.4	0.39	0.98502	0.602189	0.999401	2	Neutral	0.000670505	Disease	5	Benign	1	0	Non-neutral	0	Deleterious	0.87
9	22008871	C	G	22.5	0.63	0.52631	0.606814	0.988613	3	Deleterious	0.988297	Neutral	6	Benign	0.968	0.13	Neutral	5	Neutral	0.74
1	154304445	C	T	31	0.51	0.95951	0.724815	0.999031	3	Neutral	0.00839754	Disease	5	Benign	0.992	0.02	Non-neutral	1	Deleterious	0.87
19	10088075	C	T	29.5	0.25	0.98238	0.547309	0.997929	2	Neutral	5.55199e-07	Disease	7	Benign	1	0	Non-neutral	5	Deleterious	0.87
10	50315797	C	T	17.08	0.18	0.10865	0.650271	0.989617	1	Deleterious	0.537142	Neutral	5	Benign	0.978	0.41	Neutral	5	Neutral	0.74
11	75279858	G	A	15.22	0.22	0.22035	0.702456	0.970551	2	Neutral	0.0204549	Neutral	0	Possibly damaging	0.602	0.01	Non-neutral	0	Deleterious	0.76
19	42563622	G	A	25.8	0.41	0.98842	0.702456	0.99911	3	Deleterious	0.482856	Neutral	3	Benign	0.974	0.07	Neutral	2	Neutral	0.74
16	71784144	A	G	27.9	0.39	0.98934	0.743671	0.999201	4	Neutral	0.0014423	Disease	8	Benign	1	0	Non-neutral	0	Deleterious	0.87
9	139904080	C	T	31	0.52	0.94045	0.723109	0.998263	2	Neutral	6.29282e-05	Disease	8	Possibly damaging	0.992	0	Non-neutral	3	Deleterious	0.87
6	54805757	G	A	21.5	0.42	0.85637	0.618467	0.999452	3	Deleterious	0.205991	Neutral	6	Benign	1	0.01	Non-neutral	2	Deleterious	0.61
13	43544765	C	A	31	0.64	0.84548	0.602189	0.98699	2	Neutral	8.35453e-06	Neutral	7	Benign	1	0	Non-neutral	2	Deleterious	0.72
2	158622630	G	A	35	0.66	0.98952	0.724815	0.999372	4	Neutral	0.00395808	Disease	1	Benign	1	0	Non-neutral	2	Deleterious	0.87
6	53989580	C	T	25	0.25	0.89534	0.547309	0.999228	2	Neutral	0.0483529	Neutral	5	Benign	0.93	0.01	Neutral	4	Neutral	0.6
5	170232795	G	A	25	0.25	0.82618	0.658983	0.996331	2	Neutral	0.000135721	Disease	2	Benign	0.868	0.16	Neutral	5	Neutral	0.6
6	136589404	C	T	33	0.67	0.97845	0.724815	0.99907	3	Deleterious	0.975809	Neutral	9	Benign	0.524	0.05	Neutral	1	Neutral	0.74
12	120602261	C	T	33	0.56	0.97875	0.827368	0.997681	3	Deleterious	0.611601	Neutral	7	Benign	0.578	0.04	Neutral	5	Neutral	0.6
1	112998998	C	T	13.29	0.45	0.17746	0.724815	0.58345	4	Deleterious	0.995616	Neutral	7	Benign	0.908	0.3	Neutral	1	Neutral	0.74
1	206772865	T	C	25.9	0.5	0.99369	0.743671	0.998297	3	Deleterious	0.163605	Disease	6	Possibly damaging	1	0.03	Non-neutral	4	Deleterious	0.72
11	55761311	G	A	23	0.27	0.04765	0.547309	0.996411	2	Neutral	0.0836433	Disease	3	Benign	0.604	0	Non-neutral	2	Deleterious	0.87
21	33651220	A	C	20.8	0.47	0.62696	0.52208	0.981263	2	Deleterious	0.229717	Neutral	8	Benign	0.05	0.15	Neutral	1	Neutral	0.83
3	61734593	C	G	22.7	0.51	0.95982	0.688494	0.984169	3	Neutral	0.00275255	Disease	2	Benign	0.988	0	Non-neutral	3	Deleterious	0.72
18	22806179	G	A	23.4	0.61	0.99142	0.608884	0.949875	3	Neutral	0.0678314	Neutral	1	Benign	0.796	0	Neutral	2	Neutral	0.6
8	17163275	C	T	16.82	0.43	0.03999	0.566861	0.835266	2	Deleterious	0.958727	Neutral	8	Benign	1	0.53	Neutral	7	Neutral	0.75
3	183755822	G	A	9.564	0.27	0.81348	0.68496	0.975753	1	Deleterious	0.559563	Disease	6	Benign	0.964	0.11	Non-neutral	3	Deleterious	0.61
12	8075518	C	T	34	0.18	0.97283	0.702456	0.999293	3	Neutral	0.00087076	Disease	4	Benign	0.974	0	Non-neutral	6	Deleterious	0.87
1	150239482	G	A	22.3	0.45	0.98935	0.702456	0.998852	2	Neutral	3.82267e-05	Disease	8	Possibly damaging	0.994	0	Non-neutral	2	Deleterious	0.87
6	34952981	G	A	28.4	0.72	0.99405	0.743671	0.999418	4	Neutral	5.23581e-06	Neutral	4	Benign	0.998	0.37	Non-neutral	3	Deleterious	0.61
2	210594583	G	A	23.5	0.43	0.72207	0.653264	0.99693	3	Deleterious	0.229767	Disease	3	Benign	0.642	0.29	Non-neutral	1	Neutral	0.6
16	15716921	G	A	9.496	0.6	0.85635	0.65145	0.985618	2	Neutral	0.00813069	Neutral	8	Benign	0.236	0.06	Neutral	2	Neutral	0.74
15	52486179	G	A	22.2	0.51	0.99123	0.743671	0.998907	2	Deleterious	0.672635	Disease	5	Possibly damaging	0.988	0	Non-neutral	3	Deleterious	0.72
15	101569415	G	A	19.18	0.43	0.96039	0	0.999456	2	Deleterious	0.640147	Neutral	1	Benign	1	0	Non-neutral	2	Deleterious	0.61
11	55541284	G	A	20.5	0.26	0.58051	0.573888	0.892398	2	Neutral	0.0252005	Neutral	4	Benign	0.956	0.03	Non-neutral	3	Deleterious	0.55
5	170819769	A	C	12.43	0.31	0.15829	0.698795	0.942847	3	Deleterious	0.698385	Neutral	5	Benign	0.896	0.42	Neutral	4	Neutral	0.74
11	56237885	A	G	23.9	0.34	0.66788	0.573888	0.997073	2	Neutral	0.000186442	Disease	4	Possibly damaging	0.972	0	Non-neutral	3	Deleterious	0.87
3	128350847	G	A	34	0.49	0.95951	0.724815	0.999155	4	Neutral	2.80394e-05	Disease	8	Benign	0.95	0.02	Non-neutral	5	Deleterious	0.87
3	112724421	C	G	21.6	0.41	0.8675	0.702456	0.995076	2	Neutral	0.0450147	Neutral	0	Benign	1	0	Non-neutral	4	Deleterious	0.79
4	152551019	C	T	35	0.454281	0.93187	0.643519	0.999296	2	Deleterious	0.123261	Disease	7	Benign	1	0	Non-neutral	3	Deleterious	0.76
17	79910844	C	T	11.66	0.46	0.89219	0.576033	0.990112	4	Neutral	0.00704178	Neutral	2	Benign	1	0	Non-neutral	2	Deleterious	0.76
20	55027446	G	A	22.9	0.46	0.73229	0.547309	0.996842	3	Neutral	0.00530266	Neutral	6	Benign	0.998	0	Neutral	0	Deleterious	0.61
14	23532717	C	T	24.4	0.45	0.88627	0.702456	0.9989	4	Deleterious	0.70456	Neutral	9	Benign	0.678	0.44	Neutral	3	Neutral	0.75
11	123777273	G	A	23.7	0.26	0.26859	0.573888	0.988121	2	Deleterious	0.755579	Neutral	2	Benign	0.764	0.01	Neutral	1	Neutral	0.65
5	102508931	C	T	35	0.75	0.96448	0.658983	0.999138	2	Neutral	0.0408447	Disease	1	Benign	1	0	Neutral	0	Deleterious	0.76
3	52553304	G	A	15.86	0.52	0.68995	0.503968	0.998871	3	Neutral	0.00198059	Disease	1	Benign	0.974	0.08	Neutral	0	Neutral	0.6
19	55451643	C	T	22.6	0.17	0.0088	0.645312	0.993695	2	Neutral	0.0666701	Disease	2	Benign	0.984	0.01	Neutral	5	Deleterious	0.52
14	24976583	G	A	19.26	0.29	0.87845	0.573888	0.999122	3	Neutral	2.02872e-05	Disease	6	Benign	1	0.01	Non-neutral	1	Deleterious	0.87
19	14028937	A	G	23.9	0.37	0.97626	0.723109	0.99844	3	Deleterious	0.782131	Neutral	4	Benign	0.874	0.11	Neutral	3	Neutral	0.74
6	24437388	C	T	25.4	0.37	0.51563	0.709663	0.998928	2	Deleterious	0.690156	Neutral	7	Benign	1	0.01	Non-neutral	3	Deleterious	0.55
6	110944110	C	G	24.1	0.5	0.91806	0.658983	0.99698	3	Deleterious	0.690378	Neutral	4	Benign	0.684	0.03	Neutral	2	Neutral	0.6
7	55433884	A	C	5.537	0.35	0.05062	0.519653	0.680573	2	Deleterious	0.219487	Neutral	6	Benign	1	0.31	Neutral	6	Neutral	0.75
9	131503855	G	A	25.8	0.79	0.99054	0.709663	0.999038	3	Neutral	0.0372821	Neutral	6	Possibly damaging	0.97	0.14	Non-neutral	1	Deleterious	0.52
12	43846171	C	T	24.8	0.4	0.97949	0.653264	0.996345	2	Deleterious	0.166737	Disease	7	Benign	0.15	0	Neutral	1	Deleterious	0.51
1	102290780	C	T	23.6	0.482867	0.95842	0.602189	0.99798	3	Deleterious	0.644826	Neutral	2	Benign	0.324	0.02	Neutral	6	Neutral	0.74
12	113717965	T	G	23	0.52	0.9885	0.709663	0.924749	4	Deleterious	0.539359	Neutral	4	Benign	1	0.73	Non-neutral	0	Neutral	0.63
9	140330543	G	C	14.69	0.38	0.27714	0.645312	0.997428	2	Deleterious	0.832206	Neutral	1	Benign	0.992	0	Neutral	2	Neutral	0.63
1	7887271	C	T	8.809	0.16	0.14772	0.658983	0.987779	2	Neutral	0.000252811	Neutral	6	Possibly damaging	0.996	0.13	Neutral	2	Neutral	0.6
1	185270182	C	T	23.7	0.414974	0.98559	0.702456	0.999019	3	Deleterious	0.586061	Neutral	2	Benign	0.952	0.01	Non-neutral	3	Neutral	0.6
1	11168340	C	T	28.9	0.48	0.98938	0.724815	0.996984	4	Deleterious	0.956956	Neutral	8	Benign	0.026	0.02	Non-neutral	0	Neutral	0.68
16	72164159	C	T	18.96	0.46	0.08289	0.602189	0.9981	3	Deleterious	0.865267	Neutral	5	Possibly damaging	0.942	0.49	Non-neutral	1	Neutral	0.6
4	70079978	G	A	10.34	0.22	0.12284	0.573888	0.996058	1	Deleterious	0.45955	Disease	4	Benign	0.262	0.05	Neutral	0	Neutral	0.63
22	29091777	C	T	33	0.64	0.97489	0.743671	0.999322	4	Neutral	0.000176157	Disease	6	Benign	1	0	Non-neutral	4	Deleterious	0.87
1	117086977	G	A	22.5	0.49	0.05705	0.658983	0.995119	1	Deleterious	0.256787	Neutral	6	Possibly damaging	1	0	Neutral	2	Deleterious	0.51
2	136393658	A	G	17.43	0.52	0.99634	0.724815	0.906974	3	Deleterious	0.572971	Neutral	8	Benign	0.862	0.21	Neutral	6	Neutral	0.74
5	139725892	C	T	22.4	0.22	0.70916	0	0.980405	3	Neutral	0.0594419	Neutral	8	Benign	0.962	0.16	Non-neutral	0	Neutral	0.6
12	29786150	C	T	35	0.260927	0.97566	0.709663	0.999622	3	Deleterious	0.871772	Disease	9	Benign	1	0	Non-neutral	4	Deleterious	0.72
11	129739745	G	A	34	0.57	0.98943	0.724815	0.999218	3	Neutral	1.95374e-05	Neutral	3	Benign	1	0	Non-neutral	3	Deleterious	0.76
19	53209619	G	A	22.6	0.37	0.01654	0.446627	0.993795	1	Deleterious	0.143734	Neutral	5	Benign	0.772	0	Neutral	3	Neutral	0.63
17	16332214	C	T	21.7	0.49	0.82386	0.602189	0.975099	3	Deleterious	0.300592	Disease	4	Benign	0.998	0	Neutral	2	Deleterious	0.51
10	54528199	C	T	4.715	0.52	0.09148	0.573888	0.946566	3	Deleterious	0.708786	Neutral	4	Benign	0.996	0.01	Non-neutral	0	Neutral	0.6
10	99664443	C	T	23.8	0.45	0.97065	0.527494	0.991348	3	Neutral	0.0831187	Disease	4	Possibly damaging	0.518	0.03	Non-neutral	0	Deleterious	0.87
10	96971721	G	A	11.84	0.44	0.00832	0.667716	0.870145	1	Neutral	0.000624202	Disease	8	Benign	0.902	0.74	Non-neutral	0	Deleterious	0.55
5	61653555	G	A	35	0.52	0.99333	0.743671	0.999452	3	Neutral	0.015867	Disease	7	Benign	1	0	Non-neutral	4	Deleterious	0.87
1	202287206	T	C	4.951	0.36	0.12817	0.602189	0.519807	1	Deleterious	0.310003	Neutral	8	Benign	1	1	Neutral	2	Neutral	0.75
10	124096160	A	G	12.54	0.27	0.90226	0.602189	0.996046	2	Neutral	0.0137439	Neutral	6	Possibly damaging	0.978	0.03	Non-neutral	3	Deleterious	0.65
1	24696236	G	A	10.6	0.22	0.02442	0.658983	0.964635	1	Deleterious	0.787465	Neutral	3	Benign	0.428	0.06	Neutral	1	Neutral	0.83
1	150204119	C	T	27.6	0.24	0.95279	0.732669	0.998637	4	Neutral	0.0537146	Neutral	5	Benign	0.846	0.17	Neutral	3	Neutral	0.68
17	67187331	G	A	12.4	0.37	0.01071	0.547309	0.881037	1	Deleterious	0.102851	Neutral	3	Benign	0.622	0.3	Neutral	5	Neutral	0.74
22	38370190	G	T	20.7	0.34	0.99841	0.717052	0.99417	4	Deleterious	0.708372	Neutral	1	Possibly damaging	0.998	0	Neutral	4	Deleterious	0.51
9	116186544	A	G	22.8	0.28	0.0179	0.547309	0.995557	1	Neutral	0.0606531	Neutral	4	Possibly damaging	0.998	0	Non-neutral	1	Deleterious	0.72
19	43674267	G	A	0.001	0.21	0.00116	0.573888	0.668355	1	Deleterious	0.998221	Neutral	7	Benign	0.946	0.07	Neutral	0	Neutral	0.74
15	66729181	A	G	32	0.47	0.99058	0.724815	0.998377	4	Neutral	0.177179	Disease	6	Benign	1	0	Non-neutral	3	Deleterious	0.76
4	103228665	C	A	27.8	0.42	0.86898	0.709663	0.998447	3	Deleterious	0.984459	Neutral	1	Benign	0.628	0.07	Non-neutral	0	Neutral	0.65
7	95166892	G	T	21.9	0.43	0.98032	0.547309	0.993565	3	Deleterious	0.4171	Neutral	4	Benign	0.694	0.04	Neutral	2	Neutral	0.6
11	118405047	C	A	18.48	0.32	0.36079	0.723109	0.990011	2	Neutral	0.0294212	Neutral	6	Benign	0.75	0.07	Neutral	0	Neutral	0.6
16	22926383	G	A	28.4	0.38	0.98984	0.709663	0.998983	2	Neutral	0.0863471	Disease	3	Possibly damaging	0.996	0.01	Neutral	0	Deleterious	0.76
17	63010911	T	C	25.7	0.59	0.87172	0.709663	0.998829	4	Neutral	0.000417511	Disease	8	Benign	0.908	0	Non-neutral	4	Deleterious	0.87
11	18955715	G	A	8.465	0.17	0.18151	0.547309	0.996758	2	Deleterious	0.146902	Disease	5	Possibly damaging	0.92	0	Neutral	0	Deleterious	0.61
17	6493284	C	A	21.4	0.43	0.33077	0.724815	0.99429	2	Deleterious	0.605119	Neutral	7	Benign	0.954	0.12	Neutral	5	Neutral	0.74
19	39361496	C	A	6.219	0.25	0.02611	0.503968	0.893686	1	Deleterious	0.124175	Neutral	8	Benign	0.764	0.34	Neutral	0	Neutral	0.74
20	43739049	G	T	23.8	0.36	0.84767	0.547309	0.993495	2	Neutral	0.000143958	Neutral	8	Benign	1	0	Non-neutral	3	Deleterious	0.72
2	74274711	C	T	19.74	0.29	0.68582	0.65145	0.99815	2	Deleterious	0.232665	Neutral	7	Benign	0.98	0.14	Neutral	1	Neutral	0.74
17	5336349	C	T	16.79	0.29	0.93672	0.702456	0.916892	4	Deleterious	0.246749	Neutral	7	Benign	0.854	0.1	Neutral	1	Neutral	0.74
9	131151610	C	T	7.716	0.56	0.1255	0.673471	0.879287	3	Deleterious	0.290158	Neutral	9	Benign	0.998	0.29	Neutral	7	Neutral	0.74
12	96640892	G	A	16.66	0.54	0.91796	0.709663	0.985405	3	Deleterious	0.268469	Neutral	7	Benign	0.934	0.09	Neutral	6	Neutral	0.74
1	7807783	G	A	23.6	0.25	0.97192	0.658983	0.961974	4	Deleterious	0.127053	Neutral	8	Benign	0.898	0.64	Non-neutral	0	Neutral	0.68
15	68624720	C	T	23.6	0.22	0.86285	0.547309	0.999009	2	Deleterious	0.976366	Neutral	0	Benign	0.962	0.02	Non-neutral	0	Neutral	0.6
11	46568697	C	A	34	0.55	0.99707	0.732669	0.957261	3	Neutral	0.000189974	Disease	7	Benign	0.024	0.04	Non-neutral	4	Deleterious	0.61
19	7976013	C	T	19.48	0.33	0.9817	0.723109	0.999013	3	Deleterious	0.96811	Disease	4	Benign	1	0	Non-neutral	1	Deleterious	0.72
21	34012016	G	A	25.9	0.64	0.96379	0.658983	0.998971	3	Neutral	0.0775315	Neutral	7	Benign	0.974	0.18	Non-neutral	1	Neutral	0.6
2	135625155	G	A	27.4	0.54	0.99804	0.653264	0.998979	3	Deleterious	0.196154	Neutral	1	Possibly damaging	0.988	0.05	Neutral	1	Neutral	0.6
8	124989720	G	A	33	0.44	0.99172	0.547309	0.999392	3	Deleterious	0.382349	Disease	6	Possibly damaging	0.998	0	Non-neutral	2	Deleterious	0.72
13	73491250	C	T	32	0.45	0.98826	0.658983	0.998603	2	Deleterious	0.439892	Disease	1	Benign	0.998	0	Non-neutral	0	Deleterious	0.72
1	161163166	C	T	22.4	0.24	0.97943	0.688494	0.999331	3	Deleterious	0.305348	Disease	8	Benign	1	0	Non-neutral	3	Deleterious	0.76
19	40902698	G	C	0.069	0.55	0.01405	0.723109	0.204181	2	Deleterious	0.670419	Neutral	8	Benign	1	0.76	Neutral	7	Neutral	0.75
1	171753429	C	T	33	0.28	0.97336	0.723133	0.999194	2	Neutral	0.0790426	Neutral	0	Benign	1	0	Neutral	1	Deleterious	0.61
2	177036295	C	T	22.2	0.22	0.97356	0.606814	0.999316	4	Neutral	2.7651e-06	Disease	8	Benign	1	0	Non-neutral	4	Deleterious	0.87
9	136559485	C	T	24.5	0.15	0.96954	0.645312	0.99684	2	Deleterious	0.616662	Neutral	2	Benign	0.988	0.01	Neutral	5	Neutral	0.6
3	18462335	C	A	22.2	0.46	0.93603	0.709663	0.987504	3	Deleterious	0.289902	Neutral	7	Benign	0.998	0	Non-neutral	1	Deleterious	0.61
6	133035033	C	T	13.73	0.29	0.62682	0.547309	0.997318	2	Deleterious	0.228366	Neutral	1	Benign	0.944	0.05	Neutral	4	Neutral	0.74
5	169309965	G	A	6.174	0.26	0.1285	0.573888	0.870103	2	Deleterious	0.497593	Neutral	8	Benign	1	0.26	Neutral	5	Neutral	0.75
3	151129262	C	T	23.5	0.32	0.57998	0.658983	0.998449	3	Neutral	0.00781394	Neutral	8	Benign	0.65	0.01	Neutral	1	Neutral	0.6
8	125565267	G	A	12.18	0.39	0.2418	0.65145	0.952392	2	Deleterious	0.136786	Neutral	7	Benign	0.23	0.1	Neutral	6	Neutral	0.83
3	10183647	G	A	9.45	0.36	0.3858	0.52208	0.955663	3	Neutral	0.0948355	Neutral	3	Possibly damaging	0.406	0	Non-neutral	1	Deleterious	0.61
6	32147490	G	T	19.64	0.19	0.57834	0.698795	0.885307	4	Deleterious	0.959868	Neutral	7	Benign	0.99	1	Neutral	7	Neutral	0.74
15	64506094	C	T	33	0.7	0.98435	0.724815	0.998563	4	Deleterious	0.111498	Disease	4	Benign	1	0	Non-neutral	2	Deleterious	0.76
16	31925797	A	T	4.365	0.53	0.036	0.743671	0.84238	2	Neutral	0.0679973	Neutral	3	Benign	0.026	0.71	Neutral	5	Neutral	0.74
16	20352614	C	T	23.3	0.13	0.08575	0.547309	0.998816	3	Deleterious	0.837591	Neutral	4	Benign	0.058	0.06	Neutral	3	Neutral	0.83
15	65490022	G	A	25.1	0.61	0.75209	0.547309	0.99764	3	Neutral	1.79882e-05	Neutral	4	Benign	0.974	0	Neutral	1	Deleterious	0.61
12	72274276	C	G	22.4	0.56	0.98903	0.709663	0.92684	3	Deleterious	0.298589	Neutral	8	Benign	0.986	0.6	Neutral	2	Neutral	0.74
15	75108832	A	C	12.37	0.22	0.88835	0.578056	0.947589	2	Deleterious	0.131519	Neutral	4	Benign	0.66	0	Neutral	0	Neutral	0.63
11	66192507	G	A	26.4	0.55	0.98529	0.602189	0.998259	4	Deleterious	0.995685	Neutral	9	Possibly damaging	0.972	0.02	Neutral	3	Neutral	0.6
6	42830330	G	A	29.1	0.54	0.97401	0.608884	0.999378	2	Deleterious	0.165138	Neutral	7	Benign	0.998	0.01	Non-neutral	0	Deleterious	0.55
12	6980441	C	T	18.3	0.32	0.94515	0.749866	0.989342	2	Deleterious	0.826853	Neutral	0	Benign	0.998	0	Non-neutral	3	Deleterious	0.61
17	48166613	G	A	19.85	0.3	0.27211	0.709663	0.995211	4	Deleterious	0.458932	Neutral	8	Benign	0.988	0.34	Neutral	3	Neutral	0.74
4	47427893	G	A	23.7	0.22	0.96266	0.618467	0.995007	3	Deleterious	0.864942	Neutral	2	Benign	0.708	0.4	Neutral	4	Neutral	0.74
4	170913247	C	T	21.9	0.58	0.97975	0.616094	0.999441	3	Neutral	0.000114646	Disease	7	Possibly damaging	1	0.01	Neutral	3	Deleterious	0.76
1	161167952	G	A	12.31	0.22	0.37218	0.851219	0.998651	3	Deleterious	0.183003	Disease	2	Benign	1	0	Non-neutral	2	Deleterious	0.76
7	51096036	G	C	2.797	0.24	0.19161	0.724815	0.743726	1	Deleterious	0.968781	Neutral	9	Benign	0.952	0.11	Neutral	1	Neutral	0.74
15	76254214	G	A	2.468	0.45	0.0319	0.573888	0.925029	3	Neutral	0.0963507	Neutral	2	Benign	0.966	1	Neutral	5	Neutral	0.68
9	107457677	G	T	23.6	0.23	0.55303	0.573888	0.994892	2	Neutral	0.000123634	Disease	7	Benign	0.998	0	Non-neutral	3	Deleterious	0.87
13	53254168	G	A	22.3	0.47	0.96477	0.743671	0.990452	4	Deleterious	0.882631	Neutral	6	Benign	0.65	0.13	Neutral	8	Neutral	0.75
10	23482809	G	A	25.9	0.22	0.99245	0.596491	0.997387	3	Deleterious	0.501684	Neutral	3	Possibly damaging	0.996	0	Non-neutral	2	Deleterious	0.61
3	98110321	C	G	10.87	0.34	0.21531	0.547309	0.995721	2	Neutral	0.000441162	Disease	5	Possibly damaging	0.974	0.05	Non-neutral	1	Deleterious	0.87
8	38274849	G	C	21.6	0.57	0.95106	0.702456	0.998455	4	Deleterious	0.998253	Disease	6	Possibly damaging	1	0	Non-neutral	1	Deleterious	0.65
11	105929626	G	A	35	0.58	0.99037	0.602189	0.999305	3	Neutral	3.8903e-05	Disease	7	Benign	1	0	Non-neutral	3	Deleterious	0.87
10	50530868	C	T	15.18	0.207564	0.24915	0.547309	0.99026	2	Neutral	0.0217956	Neutral	8	Benign	0.902	0.01	Neutral	4	Neutral	0.6
9	139617571	A	C	15.79	0.26	0.8965	0.696144	0.978493	2	Deleterious	0.121248	Neutral	4	Benign	0.806	0.05	Non-neutral	2	Neutral	0.6
2	242186199	G	A	7.613	0.36	0.94999	0.724815	0.997108	3	Neutral	0.00970155	Disease	6	Benign	1	0.01	Neutral	1	Deleterious	0.76
8	133182665	C	T	25.8	0.39	0.99105	0.618467	0.990912	3	Deleterious	0.990567	Disease	7	Possibly damaging	0.988	0.01	Neutral	4	Deleterious	0.55
17	18874692	G	A	12.41	0.41	0.05963	0.702456	0.99805	1	Deleterious	0.214682	Neutral	8	Benign	0.976	0.04	Non-neutral	1	Deleterious	0.52
9	138825253	C	T	29.7	0.32	0.98397	0.724815	0.99935	4	Deleterious	0.996178	Neutral	1	Benign	0.984	0	Non-neutral	2	Deleterious	0.51
19	15760838	C	T	19.25	0.286573	0.38011	0.573888	0.991168	1	Deleterious	0.224621	Disease	1	Possibly damaging	0.06	0.04	Neutral	3	Neutral	0.6
11	10515007	C	T	26.8	0.55	0.614	0.658983	0.999003	3	Deleterious	0.170703	Neutral	2	Benign	0.992	0	Neutral	0	Deleterious	0.51
1	109235328	G	A	17.94	0.62	0.5824	0.52208	0.994695	2	Deleterious	0.397314	Neutral	9	Benign	0.964	0.19	Neutral	2	Neutral	0.74
1	203194186	C	T	16.99	0.24	0.86224	0.573888	0.998169	2	Neutral	1	Disease	0	Benign	1	0.01	Neutral	4	Deleterious	0.55
14	38724651	G	A	22.3	0.6	0.30919	0.606814	0.99906	3	Deleterious	0.127268	Neutral	7	Benign	0.978	0.03	Non-neutral	1	Deleterious	0.55
11	47360954	C	T	12.38	0.35	0.13587	0.578056	0.944872	3	Neutral	8.4537e-07	Disease	5	Benign	0.986	0.04	Neutral	2	Deleterious	0.61
3	184910033	G	A	12.64	0.33	0.12259	0.602189	0.978075	3	Deleterious	0.360472	Neutral	8	Benign	0.58	0.03	Non-neutral	2	Deleterious	0.52
12	56824013	C	T	26.8	0.43	0.90449	0.724815	0.999347	4	Neutral	0.0594974	Neutral	5	Benign	0.838	0.29	Non-neutral	2	Neutral	0.6
1	43232588	C	A	16.22	0.31	0.06362	0.52208	0.978063	1	Deleterious	0.859111	Neutral	6	Benign	0.982	0.39	Neutral	3	Neutral	0.74
5	173036394	C	T	32	0.41	0.98897	0.724815	0.998627	3	Neutral	0.000963085	Disease	3	Benign	0.67	0.11	Non-neutral	3	Deleterious	0.61
1	27677345	G	A	22.6	0.45	0.97036	0.768056	0.999292	3	Neutral	0.0218643	Disease	5	Possibly damaging	1	0.16	Non-neutral	1	Deleterious	0.72
1	161010631	C	T	22.5	0.47	0.97813	0.724815	0.99878	4	Neutral	0.0474109	Disease	1	Benign	0.48	0.01	Neutral	4	Neutral	0.6
17	61621019	C	T	22.4	0.51	0.68684	0.527494	0.996643	3	Deleterious	0.704881	Neutral	4	Benign	1	0	Neutral	3	Neutral	0.63
6	49419381	G	T	28.8	0.62	0.99279	0.709663	0.994113	3	Deleterious	4.07945e-07	Disease	8	Benign	1	0	Non-neutral	2	Deleterious	0.87
7	100867021	G	A	27	0.56	0.96835	0.743671	0.999558	3	Neutral	0.00216639	Neutral	5	Benign	1	0	Neutral	1	Deleterious	0.61
4	101947137	G	A	34	0.5	0.98427	0.80507	0.998504	3	Neutral	0.00313488	Disease	7	Benign	1	0	Non-neutral	1	Deleterious	0.87
12	53039092	C	T	23	0.33	0.55473	0.547309	0.983244	3	Deleterious	0.651155	Neutral	3	Possibly damaging	0.978	0.31	Neutral	0	Neutral	0.63
11	51516009	C	T	16.82	0.25	0.03067	0.514364	0.995679	1	Neutral	0.0496461	Neutral	4	Benign	0.582	0.08	Neutral	3	Neutral	0.68
4	68930558	C	T	7.206	0.29	0.01311	0.573888	0.699334	1	Deleterious	0.261518	Neutral	4	Benign	1	0.98	Neutral	4	Neutral	0.75
7	117024817	A	G	15.47	0.41	0.14928	0.573888	0.801718	3	Deleterious	0.998964	Neutral	9	Benign	1	1	Neutral	4	Neutral	0.75
21	43522316	C	A	4.526	0.42	0.045	0.547309	0.732224	2	Deleterious	0.564551	Neutral	7	Possibly damaging	0.538	0.25	Non-neutral	3	Neutral	0.6
6	41712198	G	A	24.4	0.57	0.70812	0.547309	0.998707	4	Deleterious	0.324429	Disease	2	Possibly damaging	0.92	0	Neutral	0	Deleterious	0.61
7	37780909	G	T	2.26	0.33	0.15849	0.602189	0.990493	2	Deleterious	0.591529	Neutral	4	Benign	0.768	0.02	Non-neutral	1	Neutral	0.6
1	24981528	C	A	25.5	0.46	0.97271	0.702456	0.978406	4	Neutral	3.44167e-05	Neutral	6	Benign	0.996	0	Neutral	5	Deleterious	0.61
3	124807214	C	T	30	0.41	0.96002	0.083675	0.997842	2	Neutral	0.00193944	Disease	2	Benign	1	0	Non-neutral	6	Deleterious	0.87
15	66025127	G	T	21.5	0.55	0.97215	0.573888	0.997287	3	Deleterious	0.152389	Disease	4	Benign	1	0.05	Non-neutral	4	Deleterious	0.72
9	5922544	G	A	23.6	0.79	0.95681	0.658983	0.99869	2	Neutral	3.20229e-05	Neutral	4	Benign	0.256	0.13	Non-neutral	0	Neutral	0.63
1	77620260	C	T	33	0.53	0.9593	0.659464	0.999327	4	Deleterious	0.773163	Disease	7	Possibly damaging	0.992	0	Non-neutral	5	Deleterious	0.72
4	81952539	A	C	4.202	0.34	0.07759	0.606814	0.704583	1	Deleterious	0.117793	Neutral	8	Benign	0.958	0.42	Neutral	2	Neutral	0.74
16	88945788	C	T	20.7	0.51	0.96977	0.596874	0.999188	4	Neutral	9.2487e-05	Disease	2	Possibly damaging	0.99	0	Neutral	1	Deleterious	0.76
12	50031265	G	A	22.4	0.57	0.95863	0.749866	0.998705	3	Deleterious	0.145553	Disease	8	Benign	0.754	0.01	Neutral	0	Deleterious	0.51
6	10924775	G	A	2.181	0.38	0.00869	0.602189	0.518945	1	Deleterious	0.999084	Neutral	9	Benign	1	0.84	Neutral	6	Neutral	0.75
7	33296971	G	A	25.7	0.64	0.98378	0.658983	0.999329	2	Deleterious	0.782727	Neutral	5	Benign	0.446	0.02	Neutral	2	Neutral	0.74
1	111857209	G	C	16.11	0.49	0.97342	0.547309	0.996869	2	Neutral	0.0605288	Neutral	1	Benign	0.79	0	Non-neutral	2	Deleterious	0.61
1	45484799	G	C	19.91	0.61	0.97737	0.596874	0.997947	2	Neutral	6.60359e-05	Disease	1	Benign	1	0	Non-neutral	3	Deleterious	0.87
9	134615186	G	A	18.81	0.42	0.72339	0.619478	0.995426	3	Deleterious	0.823392	Neutral	5	Possibly damaging	0.86	0.03	Neutral	0	Neutral	0.6
5	148206639	T	C	16.47	0.26	0.9789	0.61531	0.990748	3	Neutral	0.03239	Neutral	1	Possibly damaging	0.884	0	Non-neutral	0	Deleterious	0.76
1	157740375	T	G	1.864	0.43	0.03007	0.596394	0.927491	2	Deleterious	0.300252	Neutral	6	Benign	0.288	0.36	Neutral	5	Neutral	0.83
5	79752368	G	A	28.3	0.71	0.41159	0.658983	0.999296	3	Deleterious	0.603523	Neutral	4	Possibly damaging	0.398	0.31	Non-neutral	2	Neutral	0.63
4	40356304	G	A	16.35	0.2	0.60773	0.565031	0.73811	2	Deleterious	0.99999	Neutral	8	Benign	1	0.62	Neutral	6	Neutral	0.75
1	160011274	C	T	22.4	0.48	0.6833	0.658983	0.961357	2	Deleterious	0.13296	Neutral	6	Benign	0.878	0.93	Neutral	5	Neutral	0.74
2	27360924	G	A	7.878	0.24	0.3279	0.578056	0.891619	1	Neutral	0.00193907	Neutral	8	Benign	0.692	0.07	Neutral	2	Neutral	0.65
9	117143553	G	A	24.6	0.46	0.11608	0.688494	0.998815	2	Neutral	9.9848e-06	Neutral	2	Benign	0.998	0	Non-neutral	2	Deleterious	0.76
9	135152474	C	T	16.17	0.49	0.12857	0.724815	0.974687	2	Deleterious	0.713332	Disease	1	Benign	0.92	0.7	Neutral	4	Neutral	0.65
11	65380789	G	A	22.4	0.22	0.9383	0.851219	0.999332	3	Deleterious	0.128491	Disease	3	Benign	1	0	Non-neutral	1	Deleterious	0.61
19	37975340	A	C	16.41	0.5	0.09961	0.65145	0.998065	2	Deleterious	0.325247	Neutral	2	Benign	0.998	0	Neutral	0	Deleterious	0.51
1	168698174	G	A	26.1	0.1	0.97393	0.573888	0.998734	3	Neutral	0.000845586	Neutral	7	Benign	0.984	0	Non-neutral	3	Deleterious	0.72
7	87035698	G	A	25.6	0.54	0.95901	0.602189	0.999261	2	Neutral	0.0202376	Neutral	3	Benign	0.736	0	Neutral	1	Neutral	0.6
1	110256339	G	A	11.8	0.17	0.98493	0.590023	0.998284	2	Neutral	0.000328064	Disease	4	Benign	0.994	0.02	Non-neutral	0	Deleterious	0.87
4	113353433	A	C	21.8	0.21	0.17366	0.573888	0.995828	3	Deleterious	0.298077	Neutral	8	Possibly damaging	0.99	0.02	Neutral	3	Neutral	0.6
19	40903183	C	T	22.9	0.54	0.10663	0.723109	0.987258	2	Deleterious	0.492604	Neutral	2	Benign	0.958	0.09	Neutral	3	Neutral	0.74
11	55340247	C	T	26.3	0.35	0.98136	0.573888	0.998142	2	Neutral	6.01833e-05	Neutral	3	Possibly damaging	0.836	0	Non-neutral	4	Deleterious	0.76
2	99013410	G	A	24.9	0.52	0.98778	0.547309	0.998949	3	Deleterious	0.791212	Disease	8	Benign	0.802	0.01	Neutral	0	Neutral	0.6
1	16632330	G	A	25.4	0.52	0.99219	0.724815	0.996658	2	Deleterious	0.104209	Neutral	5	Benign	0.77	0.32	Neutral	0	Neutral	0.74
20	43882237	G	A	11.81	0.28	0.53019	0.597571	0.99824	3	Neutral	0.0215325	Neutral	2	Benign	1	0	Non-neutral	1	Deleterious	0.76
2	219227480	C	A	3.126	0.31	0.03142	0.547309	0.623581	2	Deleterious	0.493809	Neutral	7	Benign	0.818	1	Non-neutral	4	Neutral	0.6
22	43926757	G	A	19.08	0.2	0.5185	0.491513	0.999274	2	Neutral	3.96578e-06	Disease	3	Benign	1	0	Non-neutral	2	Deleterious	0.87
19	44352701	A	T	23.3	0.3	0.04242	0.658983	0.99028	1	Neutral	0.0349202	Neutral	4	Possibly damaging	0.688	0	Neutral	0	Deleterious	0.61
11	55418781	G	A	22.5	0.35	0.91175	0.573888	0.988279	2	Neutral	0.000202173	Neutral	1	Benign	0.78	0.01	Non-neutral	2	Deleterious	0.61
6	166833421	G	A	21.5	0.33	0.81158	0.732433	0.998699	4	Neutral	0.00407737	Neutral	0	Benign	0.93	0.11	Neutral	1	Neutral	0.63
11	63884475	C	T	14.88	0.17	0.8639	0.673471	0.998518	3	Neutral	0.0141499	Disease	4	Benign	1	0.01	Non-neutral	0	Deleterious	0.87
1	161166610	C	T	22	0.41	0.62666	0.749866	0.983014	3	Neutral	0.082288	Neutral	4	Benign	0.932	0.25	Neutral	3	Neutral	0.68
13	45149665	T	G	23.3	0.37	0.56978	0.685571	0.996223	3	Deleterious	0.548762	Neutral	8	Benign	0.186	0.15	Neutral	1	Neutral	0.83
10	79742503	G	A	15.25	0.45	0.99598	0.724815	0.368153	4	Deleterious	0.613666	Neutral	2	Benign	0.994	1	Neutral	5	Neutral	0.74
7	20824949	C	A	18.46	0.16	0.54949	0.608004	0.990701	2	Deleterious	0.305661	Neutral	7	Benign	0.988	0.19	Neutral	2	Neutral	0.74
11	64014106	C	T	17.66	0.44	0.45905	0.600757	0.990879	3	Deleterious	0.429803	Neutral	9	Possibly damaging	0.202	0.2	Neutral	5	Neutral	0.74
16	28497729	C	T	29.3	0.432434	0.97248	0	0.998156	3	Deleterious	0.998708	Neutral	3	Possibly damaging	1	0.02	Neutral	4	Neutral	0.6
12	118588905	A	G	22.8	0.51	0.9944	0.658983	0.995468	3	Deleterious	0.27472	Neutral	3	Benign	0.87	0.19	Neutral	1	Neutral	0.74
6	27861568	C	T	22.3	0.6	0.76989	0.519653	0.995855	4	Neutral	0.043185	Disease	7	Benign	0.996	0	Neutral	2	Deleterious	0.76
17	76120700	G	C	10.72	0.51	0.34807	0.570548	0.992221	2	Deleterious	0.920618	Neutral	6	Benign	0.75	0.45	Neutral	3	Neutral	0.74
21	41385254	G	A	15.85	0.52	0.83715	0.573888	0.823076	2	Deleterious	0.209118	Neutral	9	Benign	0.994	0.34	Neutral	7	Neutral	0.74
2	26357877	G	T	24.1	0.33	0.97525	0.724815	0.985607	3	Deleterious	0.137395	Neutral	2	Benign	0.988	0.01	Neutral	0	Deleterious	0.51
7	92028039	C	A	14.76	0.45	0.21583	0.743671	0.968369	2	Neutral	0.0192249	Neutral	6	Benign	0.998	0.02	Neutral	3	Neutral	0.6
9	128000549	C	T	22.7	0.48	0.96632	0.698795	0.998545	4	Deleterious	0.996921	Disease	8	Benign	1	0	Non-neutral	2	Deleterious	0.72
6	166923792	G	A	22.3	0.72	0.9718	0.709663	0.997871	4	Deleterious	0.225028	Disease	8	Benign	0.984	0.01	Non-neutral	1	Deleterious	0.72
17	67085662	C	T	0.513	0.18	0.00425	0.573888	0.230454	2	Deleterious	0.754452	Neutral	5	Benign	0.998	0.62	Neutral	2	Neutral	0.75
5	114482959	C	A	22.5	0.58	0.99026	0.658983	0.987615	2	Deleterious	0.530172	Disease	2	Benign	0.978	0	Non-neutral	3	Deleterious	0.61
6	151674326	A	C	0.004	0.39	0.14942	0.644132	0.524723	1	Deleterious	0.591625	Neutral	9	Benign	0.994	0.53	Neutral	6	Neutral	0.74
1	156262939	T	C	22.3	0.28	0.89568	0.643519	0.995478	2	Deleterious	0.152663	Neutral	8	Benign	0.996	0.13	Non-neutral	3	Neutral	0.63
12	120586132	C	T	28.9	0.47	0.95682	0.702456	0.996945	3	Deleterious	0.152002	Disease	6	Benign	0.994	0	Non-neutral	1	Deleterious	0.72
17	7124973	A	T	19.78	0.41	0.92427	0.643519	0.996785	2	Neutral	0.0231526	Disease	8	Benign	0.998	0	Non-neutral	2	Deleterious	0.87
6	29141779	C	T	23.6	0.23	0.10568	0.573888	0.984903	2	Neutral	1.09473e-05	Neutral	1	Benign	0.09	0	Non-neutral	4	Deleterious	0.61
7	54612452	G	A	9.612	0.46	0.93391	0.606814	0.96012	3	Neutral	0.0564803	Neutral	8	Possibly damaging	0.86	0.29	Neutral	2	Neutral	0.6
1	207739262	T	C	16.44	0.37	0.4493	0.615948	0.996415	2	Neutral	4.93824e-06	Disease	6	Benign	1	0	Non-neutral	5	Deleterious	0.87
11	93796821	C	T	35	0.42	0.98988	0.573888	0.999397	2	Neutral	1.95342e-06	Disease	9	Benign	1	0	Non-neutral	0	Deleterious	0.87
3	186370163	G	C	2.287	0.37	0.037	0.547309	0.88554	1	Neutral	0.0268005	Neutral	3	Benign	0.948	0.2	Neutral	6	Neutral	0.65
17	38151480	G	T	29.4	0.51	0.98857	0.702456	0.995359	4	Neutral	0.00694643	Neutral	4	Benign	0.702	0.01	Neutral	3	Neutral	0.6
5	178392003	C	T	18.35	0.34	0.07462	0.573888	0.995343	3	Neutral	0.000812306	Disease	1	Benign	0.914	0.08	Non-neutral	4	Deleterious	0.72
12	51458364	C	T	22.3	0.28	0.95474	0.724815	0.999511	3	Deleterious	0.20224	Neutral	0	Benign	1	0.17	Neutral	1	Neutral	0.73
20	53092543	C	T	35	0.5	0.74123	0.594344	0.999101	3	Deleterious	0.176518	Neutral	1	Benign	0.994	0	Non-neutral	2	Deleterious	0.61
1	111957558	T	G	7.112	0.32	0.0272	0.653264	0.974417	1	Neutral	0.0744725	Neutral	6	Possibly damaging	0.35	0.02	Non-neutral	1	Deleterious	0.52
2	71297643	G	A	17.54	0.51	0.36204	0.854111	0.991462	2	Deleterious	0.658415	Neutral	7	Benign	0.964	0.18	Neutral	3	Neutral	0.74
11	55658765	G	T	22.9	0.26	0.47226	0.573888	0.989028	1	Neutral	8.98854e-05	Disease	8	Benign	1	0	Non-neutral	3	Deleterious	0.87
8	23191123	G	A	19.7	0.29	0.84492	0.709663	0.999044	3	Neutral	0.0988377	Disease	1	Benign	0.994	0.01	Non-neutral	3	Deleterious	0.87
6	34838760	T	C	23.1	0.36	0.98324	0.743671	0.995586	2	Deleterious	0.190186	Neutral	5	Possibly damaging	0.516	0.02	Neutral	0	Neutral	0.6
22	18095594	C	T	25.6	0.28	0.99241	0.724815	0.996134	4	Deleterious	0.625543	Neutral	2	Benign	0.058	0.03	Neutral	3	Neutral	0.74
5	141694096	A	G	17.97	0.57	0.9501	0.698795	0.998895	3	Neutral	0.000132914	Disease	7	Benign	0.988	0	Non-neutral	0	Deleterious	0.87
9	35736548	A	G	5.601	0.46	0.16961	0.67197	0.528331	3	Deleterious	0.361569	Neutral	6	Benign	0.988	0.18	Neutral	5	Neutral	0.74
6	35544830	C	T	25.2	0.53	0.98729	0.709663	0.998697	3	Deleterious	0.945875	Neutral	6	Benign	0.994	0.15	Neutral	6	Neutral	0.74
1	168037606	G	A	34	0.73	0.99517	0.743671	0.999517	3	Deleterious	0.91147	Disease	0	Possibly damaging	0.518	0.01	Non-neutral	1	Deleterious	0.64
9	137328351	C	A	33	0.29	0.94365	0.723109	0.995699	4	Deleterious	0.185046	Disease	5	Benign	1	0	Neutral	0	Deleterious	0.61
5	141336960	G	A	19.14	0.272005	0.90424	0.602189	0.99894	1	Deleterious	0.17648	Disease	0	Benign	1	0	Non-neutral	2	Deleterious	0.76
8	104388186	C	T	17.82	0.292103	0.9367	0.584781	0.715674	3	Deleterious	0.199014	Neutral	8	Benign	0.924	0.69	Non-neutral	0	Neutral	0.65
1	21807440	G	A	18.51	0.29	0.00986	0.547309	0.89556	1	Deleterious	0.277531	Disease	6	Benign	0.432	0.13	Non-neutral	1	Neutral	0.63
3	13671421	G	A	23.6	0.19	0.90657	0.723109	0.997912	3	Deleterious	0.650305	Neutral	2	Benign	0.988	0.21	Non-neutral	0	Neutral	0.63
19	10736975	T	A	10.28	0.33	0.56142	0.685571	0.479885	2	Deleterious	0.901606	Disease	4	Benign	1	0.17	Neutral	4	Neutral	0.63
21	45810858	C	T	33	0.35	0.91351	0.645312	0.999361	3	Neutral	0.00165582	Disease	9	Benign	1	0.01	Non-neutral	3	Deleterious	0.87
11	109294891	G	A	15.77	0.46	0.11406	0.61531	0.943625	2	Deleterious	0.459814	Neutral	9	Benign	0.998	0.47	Neutral	5	Neutral	0.74
5	79351631	G	A	18.28	0.34	0.87949	0.774882	0.99804	3	Deleterious	0.989701	Disease	5	Benign	0.786	0.06	Neutral	2	Neutral	0.63
1	160523903	A	G	12.7	0.53	0.02173	0.573888	0.821723	2	Deleterious	0.451864	Neutral	4	Benign	0.974	0.12	Neutral	5	Neutral	0.74
1	248525490	C	T	23.1	0.22	0.10584	0.573888	0.995464	2	Neutral	0.0628916	Neutral	2	Possibly damaging	0.768	0	Non-neutral	2	Deleterious	0.76
9	117188546	C	T	22.7	0.55	0.92257	0.709663	0.997415	1	Deleterious	0.640887	Disease	2	Benign	0.92	0.19	Neutral	2	Neutral	0.65
6	31936703	G	A	22.5	0.31	0.95524	0.702456	0.999568	3	Deleterious	0.683749	Disease	8	Benign	1	0	Non-neutral	2	Deleterious	0.72
10	114901075	G	A	33	0.64	0.99257	0.17184	0.999256	3	Neutral	0.00603908	Disease	4	Benign	1	0	Non-neutral	1	Deleterious	0.87
10	87966247	G	A	23	0.4	0.9821	0.602189	0.997135	3	Deleterious	0.972855	Neutral	4	Benign	0.956	0.32	Neutral	0	Neutral	0.74
8	133142162	C	T	16.4	0.41	0.53137	0.653264	0.985773	3	Neutral	0.0453253	Neutral	5	Possibly damaging	0.846	0.54	Non-neutral	1	Deleterious	0.51
12	7842611	C	T	13.08	0.26	0.04298	0.709663	0.804482	1	Deleterious	0.994929	Neutral	8	Benign	0.98	0.52	Neutral	4	Neutral	0.74
21	43693447	G	A	26.7	0.4	0.98499	0.645312	0.998885	4	Deleterious	0.496454	Disease	6	Benign	0.998	0	Neutral	0	Deleterious	0.51
6	31324210	G	A	13.38	0.26	0.70624	0.851219	0.916447	3	Deleterious	0.233957	Disease	4	Benign	0.64	0.09	Neutral	2	Neutral	0.63
17	16097825	T	G	21.3	0.4	0.90984	0.724815	0.874912	4	Neutral	0.0465637	Disease	8	Benign	1	0	Non-neutral	0	Deleterious	0.87
2	74317124	C	T	19.53	0.56	0.94771	0.723133	0.999331	2	Neutral	1.34063e-05	Disease	9	Benign	1	0	Non-neutral	4	Deleterious	0.76
6	28268581	G	A	6.122	0.27	0.0137	0.709663	0.931326	1	Deleterious	0.704696	Neutral	6	Benign	0.992	0.09	Neutral	6	Neutral	0.74
19	19339041	C	T	4.576	0.33	0.01412	0.717052	0.88804	2	Deleterious	0.279793	Neutral	8	Benign	0.46	0.09	Neutral	4	Neutral	0.83
1	33957297	G	A	25.6	0.37	0.98913	0.463624	0.999198	3	Deleterious	0.865265	Neutral	4	Benign	1	0.01	Non-neutral	1	Deleterious	0.61
1	152128065	C	T	3.722	0.26	0.00099	0.573888	0.0702674	1	Deleterious	0.602844	Neutral	6	Benign	0.978	0.62	Neutral	4	Neutral	0.74
4	8396360	C	T	11.97	0.33	0.00857	0.688494	0.977355	2	Deleterious	0.836326	Neutral	8	Benign	0.87	0.27	Neutral	7	Neutral	0.74
16	31476046	C	T	16.11	0.27	0.95446	0.601832	0.997097	2	Neutral	0.0126796	Neutral	5	Benign	0.572	0.02	Neutral	1	Neutral	0.6
13	20797606	G	A	14.39	0.43	0.44007	0.573888	0.991458	3	Neutral	0.382416	Disease	3	Benign	0.998	0.12	Neutral	0	Deleterious	0.51
2	128628889	C	T	35	0.7	0.98626	0.724815	0.999541	3	Neutral	0.000759455	Disease	8	Benign	0.998	0	Non-neutral	5	Deleterious	0.87
11	45671402	C	T	16.51	0.46	0.90134	0.576033	0.997427	3	Deleterious	0.48905	Neutral	1	Benign	0.006	0	Neutral	0	Neutral	0.75
11	78516405	C	A	29.7	0.49	0.98534	0.658983	0.99808	2	Neutral	0.00215589	Disease	6	Possibly damaging	1	0	Neutral	4	Deleterious	0.72
15	43724646	T	G	19.88	0.63	0.01131	0.724815	0.305966	4	Deleterious	0.799919	Neutral	9	Benign	0.994	1	Neutral	6	Neutral	0.74
5	42718559	G	A	17.15	0.27	0.98439	0.618467	0.997923	4	Neutral	5.97462e-07	Disease	9	Benign	0.998	0	Non-neutral	1	Deleterious	0.87
8	121061879	G	A	19.03	0.45	0.98255	0.735289	0.995943	2	Neutral	0.000712716	Neutral	6	Benign	0.828	0.08	Neutral	2	Neutral	0.63
19	54600214	C	T	8.165	0.27	0.01723	0.64067	0.923281	1	Deleterious	0.684121	Neutral	4	Benign	0.998	0.43	Neutral	1	Neutral	0.75
7	75693664	C	T	33	0.24	0.98954	0.743671	0.998878	3	Deleterious	0.644946	Disease	1	Possibly damaging	0.456	0.18	Non-neutral	0	Neutral	0.6
1	110655617	C	A	6.205	0.28	0.09177	0.547309	0.930628	1	Neutral	0.0665028	Neutral	6	Benign	0.904	0.09	Non-neutral	2	Neutral	0.6
22	38512136	G	A	14.43	0.33	0.20512	0.723109	0.996474	3	Deleterious	0.261713	Neutral	1	Benign	0.996	0.06	Non-neutral	0	Deleterious	0.51
17	72469983	G	A	0.001	0.264246	0.00636	0.602189	0.568865	2	Deleterious	0.292734	Neutral	8	Benign	0.934	0.39	Neutral	5	Neutral	0.74
4	76797822	A	G	7.346	0.39	0.88058	0.547309	0.415207	3	Deleterious	0.440113	Disease	5	Benign	0.738	0.49	Neutral	2	Neutral	0.63
4	122735086	G	C	22.2	0.52	0.95971	0.702456	0.988103	4	Deleterious	0.470706	Neutral	1	Benign	1	0.09	Non-neutral	1	Deleterious	0.51
17	7193752	G	A	21.4	0.11	0.98496	0.643519	0.990464	2	Deleterious	0.821743	Neutral	8	Benign	0.49	0.53	Neutral	1	Neutral	0.83
3	38404472	C	A	22.7	0.38	0.8252	0.658983	0.996408	2	Deleterious	0.727281	Neutral	7	Benign	0.842	0.04	Neutral	3	Neutral	0.71
11	9442171	C	T	25.7	0.56	0.99244	0.724815	0.998594	4	Neutral	0.0663119	Disease	1	Possibly damaging	0.096	0	Neutral	0	Deleterious	0.61
14	92609402	C	T	25.7	0.64	0.99527	0.724815	0.999047	4	Deleterious	0.167533	Disease	6	Possibly damaging	0.978	0.07	Non-neutral	0	Deleterious	0.61
14	20711627	G	A	15.34	0.32	0.06852	0.573888	0.987594	2	Neutral	0.0708112	Neutral	8	Possibly damaging	1	0.1	Neutral	1	Neutral	0.6
11	66083129	T	C	6.869	0.2	0.00585	0.709663	0.501835	1	Deleterious	0.990753	Neutral	9	Benign	1	1	Neutral	6	Neutral	0.75
1	21191656	C	A	34	0.55	0.99312	0.724815	0.995646	4	Deleterious	0.328859	Neutral	4	Benign	0.914	0.01	Non-neutral	0	Neutral	0.6
15	45803437	T	C	21.9	0.41	0.9818	0.573888	0.997929	3	Neutral	1.09769e-06	Disease	8	Possibly damaging	1	0	Non-neutral	5	Deleterious	0.87
22	37268388	G	A	22.4	0.32	0.96308	0.578056	0.997637	4	Neutral	0.0356601	Neutral	0	Benign	0.968	0	Non-neutral	1	Deleterious	0.76
19	41727944	G	A	15.83	0.35	0.00295	0.723109	0.95712	2	Deleterious	0.865401	Neutral	9	Benign	1	0.25	Neutral	6	Neutral	0.75
10	27323766	C	G	25.2	0.5	0.98907	0.653264	0.995879	2	Neutral	0.0236279	Disease	7	Benign	0.998	0.02	Neutral	5	Deleterious	0.72
9	33258950	C	G	22.7	0.68	0.97891	0.702456	0.99666	4	Deleterious	0.798546	Neutral	9	Possibly damaging	0.64	0.08	Neutral	5	Neutral	0.68
3	151107890	G	A	17.11	0.35	0.45071	0.658983	0.964017	2	Deleterious	0.999643	Neutral	6	Benign	0.672	0.21	Neutral	5	Neutral	0.75
19	14034594	G	A	18.4	0.422709	0.68509	0.724815	0.159254	3	Deleterious	0.999952	Neutral	8	Benign	0.982	1	Neutral	6	Neutral	0.74
6	18465225	C	T	34	0.63	0.98518	0.709663	0.998027	3	Deleterious	0.233646	Disease	1	Benign	0.994	0	Non-neutral	1	Deleterious	0.72
13	51825756	C	T	23.6	0.18	0.63115	0.702456	0.99752	1	Deleterious	0.16147	Neutral	4	Benign	0.998	0	Non-neutral	0	Deleterious	0.61
2	242128070	C	T	6.507	0.2	0.02343	0.618376	0.993884	1	Deleterious	0.16625	Neutral	6	Benign	0.93	0.23	Neutral	1	Neutral	0.74
17	16068396	G	A	24.2	0.75	0.98439	0.743671	0.987069	4	Deleterious	0.626895	Neutral	6	Benign	0.866	0.24	Neutral	3	Neutral	0.74
19	50102740	C	T	23.6	0.42	0.20832	0.702456	0.968458	2	Deleterious	0.924548	Neutral	3	Benign	0.996	0.01	Neutral	4	Neutral	0.63
8	142367335	T	C	11.83	0.28	0.56553	0	0.469768	1	Deleterious	0.401285	Neutral	2	Benign	1	1	Neutral	5	Neutral	0.75
11	7960538	A	T	22.8	0.43	0.19716	0.573888	0.97956	3	Neutral	0.000155473	Neutral	8	Benign	0.272	0	Non-neutral	3	Deleterious	0.61
15	90904247	G	A	25.8	0.38	0.52417	0.602189	0.999181	3	Deleterious	0.689856	Neutral	5	Benign	1	0	Non-neutral	3	Deleterious	0.61
5	19473754	G	A	29.8	0.31	0.35257	0.618467	0.999172	3	Deleterious	0.305178	Disease	5	Benign	1	0	Non-neutral	0	Deleterious	0.72
2	26688700	T	A	24.5	0.41	0.97915	0.547309	0.946161	3	Deleterious	0.393001	Neutral	1	Benign	0.984	0	Neutral	4	Neutral	0.63
12	55945843	C	T	18.03	0.55	0.01852	0.573888	0.996745	2	Deleterious	0.184986	Disease	1	Possibly damaging	0.568	0	Neutral	2	Deleterious	0.61
11	64536741	G	A	35	0.56	0.9472	0.702456	0.998846	4	Neutral	0.0163244	Disease	6	Possibly damaging	1	0	Non-neutral	1	Deleterious	0.87
15	76017485	C	T	14.4	0.36	0.22391	0.578056	0.947774	2	Neutral	0.0102151	Neutral	3	Possibly damaging	0.794	0.17	Neutral	4	Neutral	0.6
19	45912343	A	G	5.907	0.25	0.0036	0.643519	0.512945	2	Deleterious	0.97097	Neutral	6	Benign	1	1	Neutral	6	Neutral	0.75
11	118971782	G	T	20.6	0.52	0.55731	0.52208	0.975884	4	Neutral	0.0866468	Neutral	0	Benign	0.998	0.08	Neutral	4	Neutral	0.63
2	85628290	G	T	19.96	0.5	0.90326	0.732669	0.521335	2	Deleterious	0.919343	Neutral	7	Benign	1	1	Neutral	7	Neutral	0.75
19	7830731	G	A	0.002	0.12	0.0005	0.59043	0.280948	2	Deleterious	0.745208	Neutral	9	Benign	0.9	0.27	Neutral	1	Neutral	0.74
3	40251444	G	A	14.19	0.38	0.79752	0.618467	0.99901	3	Deleterious	0.120569	Neutral	6	Benign	0.402	0	Non-neutral	1	Neutral	0.63
2	166892727	C	T	24.9	0.32	0.91703	0.547309	0.996789	3	Deleterious	0.303162	Disease	2	Benign	0.07	0	Neutral	1	Neutral	0.63
2	225669949	A	G	29.2	0.54	0.98774	0.573888	0.999164	2	Neutral	0.0023189	Disease	10	Benign	1	0	Non-neutral	4	Deleterious	0.87
9	135931439	A	T	17.8	0.62	0.97354	0.724815	0.985023	4	Deleterious	0.754941	Neutral	5	Possibly damaging	0.188	0.12	Neutral	0	Neutral	0.75
2	128610580	G	A	29.6	0.34	0.9737	0.732669	0.9993	3	Neutral	0.00883451	Neutral	6	Benign	0.436	0	Neutral	0	Neutral	0.63
5	101834476	C	T	0.354	0.38	0.01498	0.600433	0.903001	2	Deleterious	0.29251	Neutral	8	Benign	0.906	0.25	Neutral	1	Neutral	0.74
2	130877868	C	T	18.4	0.35	0.00439	0.618467	0.98292	1	Neutral	6.29284e-07	Neutral	2	Benign	1	0.18	Non-neutral	1	Deleterious	0.61
9	126202763	G	A	22.6	0.34	0.98183	0.709663	0.997851	3	Neutral	0.0108832	Neutral	7	Possibly damaging	0.08	0.09	Non-neutral	0	Neutral	0.6
2	20240713	C	T	21	0.52	0.30078	0.743671	0.986111	2	Deleterious	0.999698	Neutral	9	Benign	0.998	0.1	Neutral	0	Neutral	0.75
4	169194513	G	A	25.3	0.46	0.75985	0.653264	0.998657	2	Neutral	0.0663082	Disease	4	Benign	1	0	Non-neutral	1	Deleterious	0.87
1	6214792	G	A	15.46	0.59	0.55251	0.603688	0.986262	3	Deleterious	0.484965	Neutral	6	Benign	0.62	0.49	Neutral	2	Neutral	0.74
1	214170552	T	A	16.32	0.58	0.97876	0.618467	0.97456	3	Neutral	0.0391159	Neutral	5	Possibly damaging	0.674	0.05	Neutral	5	Neutral	0.6
19	10084864	C	T	34	0.28	0.97285	0.547309	0.999265	2	Neutral	1.94883e-05	Disease	7	Benign	1	0	Non-neutral	5	Deleterious	0.87
1	112998820	G	C	31	0.61	0.99672	0.724815	0.998689	4	Deleterious	0.378465	Disease	1	Benign	0.734	0	Neutral	1	Neutral	0.6
17	62048560	C	T	22.3	0.17	0.97958	0.547309	0.999591	2	Neutral	0.0509249	Disease	8	Possibly damaging	1	0	Non-neutral	1	Deleterious	0.87
13	114778662	C	T	28	0.29	0.97661	0.723109	0.999185	3	Neutral	8.02904e-07	Disease	7	Possibly damaging	1	0	Non-neutral	2	Deleterious	0.87
11	126314880	C	T	20.5	0.26	0.97876	0.547309	0.998787	2	Deleterious	0.329031	Disease	3	Benign	0.544	0	Neutral	6	Neutral	0.6
11	130275704	A	G	27.3	0.24	0.97836	0.709663	0.996561	2	Deleterious	0.223918	Neutral	3	Benign	0.974	0.01	Neutral	3	Neutral	0.63
10	94373236	G	A	18.03	0.67	0.99533	0.743671	0.998794	3	Deleterious	0.113259	Neutral	4	Benign	1	0.01	Non-neutral	0	Deleterious	0.61
8	97156985	G	A	22.5	0.53	0.85745	0.666236	0.999229	3	Deleterious	0.415612	Neutral	2	Benign	0.998	0	Non-neutral	1	Deleterious	0.61
15	55626105	C	T	35	0.45	0.98379	0.658983	0.999031	2	Neutral	1.81252e-06	Disease	9	Possibly damaging	1	0	Non-neutral	4	Deleterious	0.87
11	5862319	G	A	7.756	0.32	0.78034	0.573888	0.994424	2	Neutral	0.0322636	Neutral	2	Possibly damaging	0.802	0	Non-neutral	1	Deleterious	0.76
1	248551682	C	T	17.9	0.14	0.03901	0.573888	0.993817	2	Deleterious	0.351166	Neutral	7	Benign	0.972	0.12	Neutral	5	Neutral	0.74
5	50117112	C	G	22.2	0.48	0.80703	0.709663	0.994666	2	Deleterious	0.521034	Neutral	0	Benign	0.776	0.2	Neutral	2	Neutral	0.74
2	168114370	G	T	13.09	0.65	0.9024	0.491513	0.998975	2	Deleterious	0.279318	Disease	8	Benign	0.778	0	Neutral	2	Deleterious	0.51
17	56436183	C	A	16.76	0.34	0.90505	0.576033	0.996652	2	Deleterious	0.757961	Neutral	5	Benign	0.708	0.02	Neutral	2	Neutral	0.68
9	129937044	C	T	33	0.69	0.95788	0.709663	0.997105	3	Deleterious	0.674454	Disease	1	Benign	0.982	0	Neutral	3	Deleterious	0.61
10	46999863	C	G	9.85	0.17	0.32316	0.779548	0.982182	2	Deleterious	0.659946	Neutral	8	Benign	0.958	0.05	Neutral	0	Neutral	0.63
22	50217190	C	T	34	0.33	0.95271	0.697927	0.999499	3	Deleterious	0.570512	Disease	6	Benign	1	0.18	Non-neutral	3	Deleterious	0.61
1	23782407	G	T	18.72	0.44	0.92106	0.709663	0.956434	2	Deleterious	0.800544	Disease	1	Benign	0.196	0.52	Neutral	3	Neutral	0.74
10	124043387	G	C	22.1	0.21	0.49794	0.547309	0.994466	2	Deleterious	0.637154	Neutral	7	Benign	0.938	0.04	Non-neutral	4	Deleterious	0.55
17	15950304	G	A	22	0.36	0.99084	0.724815	0.925716	4	Neutral	0.000649029	Disease	1	Benign	1	0	Non-neutral	2	Deleterious	0.87
18	34205592	G	A	34	0.29	0.99646	0.709663	0.999582	2	Deleterious	0.246692	Neutral	3	Benign	0.998	0	Non-neutral	0	Deleterious	0.61
11	102398260	C	T	24	0.29	0.07515	0.573888	0.997609	2	Deleterious	0.879625	Disease	0	Benign	0.386	0.29	Neutral	2	Neutral	0.74
19	6696664	C	T	27.1	0.27	0.85834	0.658983	0.999182	4	Neutral	1.12372e-06	Disease	7	Benign	1	0	Non-neutral	1	Deleterious	0.87
16	56792463	G	A	23.6	0.68	0.98887	0.743671	0.995938	4	Neutral	6.84958e-05	Disease	3	Possibly damaging	0.876	0	Non-neutral	2	Deleterious	0.87
14	52486867	G	A	28.6	0.53	0.99756	0.644132	0.997935	3	Deleterious	0.649604	Neutral	3	Benign	0.806	0.12	Non-neutral	3	Neutral	0.63
4	123663688	G	A	0.053	0.31	0.00104	0.602189	0.323095	1	Deleterious	0.99862	Neutral	9	Benign	1	1	Neutral	5	Neutral	0.75
3	50214261	G	A	22.3	0.62	0.97468	0.724815	0.998513	3	Deleterious	0.631934	Disease	2	Benign	0.934	0.16	Neutral	3	Neutral	0.65
19	47951460	C	T	21.7	0.25	0.98676	0.851219	0.998937	3	Neutral	0.0331406	Disease	8	Benign	0.998	0	Neutral	0	Deleterious	0.76
1	201047161	G	A	34	0.2	0.94125	0.547309	0.999279	3	Deleterious	0.402071	Neutral	6	Benign	0.988	0	Non-neutral	3	Deleterious	0.61
3	127318380	G	A	22.5	0.49	0.91934	0.685571	0.962903	4	Deleterious	0.97108	Neutral	5	Benign	0.526	0.11	Neutral	3	Neutral	0.74
8	23167365	G	A	33	0.17	0.94277	0.723109	0.999194	3	Deleterious	0.138267	Disease	3	Benign	1	0.04	Non-neutral	4	Deleterious	0.72
7	7278024	T	G	31	0.38	0.98166	0.662677	0.995145	2	Neutral	0.0109247	Disease	8	Benign	1	0	Non-neutral	3	Deleterious	0.87
2	11300786	G	A	23.6	0.28	0.90284	0.723109	0.981119	3	Neutral	0.0035985	Disease	4	Benign	0.542	0.05	Neutral	0	Deleterious	0.55
2	136473151	C	T	33	0.7	0.9964	0.724815	0.999292	3	Neutral	2.47765e-06	Neutral	1	Possibly damaging	0.996	0	Neutral	2	Deleterious	0.61
1	248551338	G	A	7.909	0.21	0.04203	0.573888	0.915739	1	Deleterious	0.749554	Neutral	4	Benign	1	0.08	Neutral	5	Neutral	0.75
22	29139878	C	T	21.5	0.48	0.93623	0.724815	0.998188	2	Deleterious	0.169004	Disease	1	Benign	0.954	0	Non-neutral	1	Deleterious	0.72
19	53762788	G	A	2.54	0.24	8e-05	0.547309	0.859149	2	Deleterious	0.95341	Neutral	6	Benign	0.978	0.4	Neutral	4	Neutral	0.74
14	68282646	G	A	22.6	0.42	0.93895	0.672317	0.998366	3	Neutral	0.0769049	Neutral	3	Possibly damaging	0.764	0	Non-neutral	2	Deleterious	0.72
19	29699033	T	C	0.001	0.57	0.35619	0.732669	0.25596	1	Deleterious	0.735436	Neutral	8	Benign	1	0.55	Neutral	3	Neutral	0.75
4	88533290	G	A	5.772	0.28	0.09215	0.547309	0.984478	3	Deleterious	0.620505	Neutral	6	Possibly damaging	0.976	0.07	Neutral	0	Neutral	0.63
11	93912962	G	A	15.53	0.22	0.79946	0.724815	0.95404	2	Deleterious	0.950652	Neutral	8	Benign	0.998	0.38	Neutral	3	Neutral	0.75
15	84568462	G	T	22.3	0.32	0.66876	0.618467	0.96417	2	Deleterious	0.22278	Neutral	2	Benign	0.912	0.37	Neutral	3	Neutral	0.74
15	58855879	G	A	0.001	0.14	0.03722	0.547309	0.641662	2	Deleterious	0.162705	Neutral	8	Benign	0.988	0.35	Neutral	3	Neutral	0.74
19	48244520	G	A	21.8	0.36	0.86151	0.723109	0.99799	3	Deleterious	0.257918	Neutral	2	Benign	0.854	0.07	Neutral	4	Neutral	0.74
9	125315488	G	A	10.29	0.26	0.01916	0.573888	0.151998	1	Neutral	0.0102207	Neutral	5	Benign	0.646	0.35	Non-neutral	0	Neutral	0.6
15	45003747	G	A	16.01	0.6	0.95433	0.52208	0.995828	3	Neutral	0.0353313	Neutral	2	Possibly damaging	0.754	0	Neutral	0	Deleterious	0.61
1	214170561	G	A	17.06	0.57	0.99097	0.618467	0.998762	3	Deleterious	0.732545	Neutral	8	Benign	0.706	0.05	Neutral	2	Neutral	0.74
10	120354383	C	T	18.98	0.21	0.02769	0.503968	0.995259	2	Deleterious	0.897302	Disease	4	Benign	0.984	0.18	Neutral	4	Neutral	0.63
18	12371683	C	T	4.073	0.31	0.00796	0.743671	0.640032	2	Deleterious	0.616731	Neutral	8	Benign	0.996	0.63	Neutral	4	Neutral	0.74
8	141321431	T	A	31	0.77	0.95397	0.709663	0.996667	3	Deleterious	0.742528	Neutral	5	Benign	1	0	Non-neutral	1	Deleterious	0.61
22	41657482	C	T	25	0.43	0.99206	0.702456	0.998665	4	Deleterious	0.979589	Neutral	3	Benign	0.66	0.01	Neutral	4	Neutral	0.68
2	10140793	A	C	6.495	0.21	0.65401	0.658983	0.979765	1	Deleterious	0.335327	Neutral	6	Benign	0.974	0.13	Neutral	5	Neutral	0.74
19	12089265	G	A	14.76	0.19	0.00037	0.658983	0.930907	1	Deleterious	0.579357	Neutral	5	Benign	0.974	0.12	Neutral	2	Neutral	0.74
2	191905852	T	G	28.6	0.49	0.99086	0.602189	0.996554	4	Neutral	1.52661e-05	Disease	7	Benign	1	0.03	Non-neutral	2	Deleterious	0.87
1	11854822	C	T	35	0.29	0.94681	0.679469	0.999575	4	Deleterious	0.142788	Disease	9	Benign	1	0	Non-neutral	4	Deleterious	0.76
7	57510026	G	A	12	0.16	0.00156	0.573888	0.828141	1	Deleterious	0.938162	Neutral	5	Benign	0.546	0.44	Neutral	3	Neutral	0.74
19	50398407	C	T	21.3	0.42	0.95264	0.578056	0.999378	4	Neutral	2.51646e-07	Disease	9	Benign	1	0	Non-neutral	2	Deleterious	0.87
15	84683440	G	C	28.3	0.62	0.96978	0.618467	0.999376	2	Neutral	4.61278e-07	Disease	9	Benign	0.952	0	Non-neutral	5	Deleterious	0.87
14	30107713	C	T	35	0.39	0.98476	0.653264	0.999206	4	Deleterious	0.352653	Disease	6	Benign	1	0	Neutral	0	Deleterious	0.61
17	62522230	T	C	7.36	0.54	0.05822	0.724815	0.804636	1	Deleterious	0.839067	Neutral	1	Benign	0.968	0.81	Neutral	5	Neutral	0.74
17	79899272	A	G	13.29	0.4	0.16092	0.769059	0.542261	2	Deleterious	0.535811	Neutral	7	Benign	1	1	Neutral	4	Neutral	0.75
3	133663949	G	C	15.46	0.33	0.77037	0.658983	0.968276	3	Deleterious	0.511731	Neutral	4	Possibly damaging	0.938	0.05	Neutral	3	Neutral	0.63
7	44805124	T	C	18.71	0.61	0.94027	0.724815	0.984279	3	Deleterious	0.730071	Neutral	7	Benign	0.998	0.03	Neutral	2	Neutral	0.65
10	30336674	C	T	7.584	0.27	0.03008	0.658983	0.489544	1	Deleterious	0.993595	Neutral	9	Benign	0.978	0.54	Neutral	7	Neutral	0.74
8	22428603	C	T	10.16	0.43	0.35935	0.743671	0.998293	4	Neutral	0.0619606	Neutral	5	Benign	0.976	0.02	Neutral	0	Deleterious	0.55
16	27475925	C	T	16.23	0.303844	0.11239	0.724815	0.989644	3	Deleterious	0.840201	Neutral	7	Benign	1	0.16	Neutral	0	Neutral	0.63
2	44099258	G	A	7.497	0.35	0.06032	0.573888	0.581528	2	Deleterious	0.315617	Disease	1	Benign	0.356	0.89	Neutral	6	Neutral	0.74
1	9099965	G	A	9.496	0.44	0.51295	0.576033	0.693485	3	Deleterious	0.14561	Neutral	3	Benign	0.988	1	Neutral	5	Neutral	0.74
2	233114050	G	C	16.58	0.57	0.92644	0.709663	0.987561	1	Deleterious	0.768407	Neutral	1	Benign	1	0.04	Neutral	7	Neutral	0.63
2	220079171	C	T	22.6	0.6	0.96591	0.702456	0.997947	3	Deleterious	0.793457	Neutral	8	Benign	0.63	0	Non-neutral	0	Neutral	0.6
14	25288272	C	T	33	0.31	0.96157	0.659464	0.999373	4	Neutral	0.0177424	Neutral	5	Benign	1	0.01	Neutral	0	Deleterious	0.61
18	8085745	G	A	22.4	0.48	0.94914	0.658983	0.996162	3	Neutral	0.0424522	Neutral	5	Benign	0.606	0.6	Neutral	2	Neutral	0.68
7	23776582	A	G	22.5	0.28	0.76017	0.573888	0.997325	2	Deleterious	0.900397	Neutral	9	Benign	0.29	0.27	Neutral	4	Neutral	0.83
18	33935598	G	A	17.95	0.38	0.96032	0.709663	0.998944	2	Deleterious	0.971217	Neutral	8	Benign	0.252	0	Neutral	3	Neutral	0.75
2	95947910	C	T	14.84	0.51	0.0414	0.658983	0.988356	2	Neutral	0.0831497	Neutral	8	Benign	0.67	0.2	Neutral	0	Neutral	0.71
13	114287470	G	A	26.6	0.61	0.99083	0.723109	0.997305	4	Neutral	5.0276e-07	Disease	8	Benign	0.5	0	Non-neutral	3	Deleterious	0.76
19	15083559	C	T	16.23	0.21	0.76675	0.570548	0.998255	2	Deleterious	0.877148	Disease	2	Benign	0.388	0.11	Neutral	4	Neutral	0.74
18	32455323	A	C	23.3	0.48	0.97575	0.653264	0.996617	4	Neutral	0.0144257	Neutral	6	Benign	0.218	0.05	Neutral	5	Neutral	0.75
11	57947749	C	A	23.7	0.39	0.44891	0.573888	0.980968	3	Neutral	3.53151e-06	Disease	6	Possibly damaging	1	0	Non-neutral	4	Deleterious	0.87
2	99013329	G	A	29.1	0.48	0.98767	0.547309	0.999376	3	Deleterious	0.170419	Disease	1	Possibly damaging	1	0	Non-neutral	1	Deleterious	0.72
6	151936783	C	A	22.4	0.45	0.68393	0.491513	0.995263	2	Neutral	0.0580527	Neutral	7	Benign	0.794	0.03	Neutral	0	Deleterious	0.52
5	137593443	C	T	23.5	0.36	0.54742	0.717052	0.997397	3	Deleterious	0.613842	Disease	4	Benign	0.984	0	Non-neutral	3	Deleterious	0.61
1	53158524	A	C	22.4	0.46	0.98209	0.702456	0.813574	2	Deleterious	0.952391	Neutral	3	Benign	0.998	0.79	Neutral	5	Neutral	0.75
17	38793763	T	C	22.2	0.42	0.99657	0.724815	0.981069	4	Neutral	1.61181e-05	Disease	3	Benign	1	0	Non-neutral	2	Deleterious	0.87
19	52887771	G	A	1.125	0.22	0.00341	0.608884	0.413781	1	Deleterious	0.988653	Neutral	3	Benign	0.922	0.64	Neutral	5	Neutral	0.74
4	104013813	T	G	23	0.32	0.66523	0.732669	0.99395	1	Deleterious	0.313807	Neutral	7	Benign	0.892	0.01	Neutral	3	Neutral	0.6
19	15587174	G	C	7.582	0.1	0.05712	0.547309	0.91267	1	Deleterious	0.318737	Neutral	2	Benign	0.416	0.2	Non-neutral	1	Neutral	0.75
4	162697175	T	C	15.93	0.4	0.94246	0.573888	0.99663	3	Deleterious	0.478318	Neutral	4	Benign	0.204	0.08	Non-neutral	0	Neutral	0.74
11	66639309	G	A	25.9	0.64	0.99053	0.709663	0.999108	3	Deleterious	0.323309	Disease	5	Benign	0.98	0.01	Neutral	3	Deleterious	0.61
14	71209191	G	A	26.1	0.3	0.88033	0.723133	0.998987	3	Neutral	0.00507427	Disease	3	Possibly damaging	1	0	Non-neutral	0	Deleterious	0.87
14	105207213	C	T	23.1	0.42	0.96415	0.723109	0.995952	3	Deleterious	0.951716	Neutral	4	Benign	0.602	0.22	Neutral	5	Neutral	0.74
16	71823246	C	T	34	0.54	0.98225	0.724815	0.999599	4	Deleterious	0.330317	Disease	4	Benign	1	0	Non-neutral	2	Deleterious	0.72
19	6760704	G	A	15.59	0.25	0.27956	0.743671	0.995853	2	Deleterious	0.778243	Neutral	4	Benign	0.234	0.04	Non-neutral	0	Neutral	0.65
13	41705387	G	A	15.08	0.45	0.52483	0.662677	0.985377	3	Neutral	0.0176849	Disease	5	Benign	0.832	0.02	Neutral	3	Deleterious	0.55
9	71628435	C	T	10.81	0.25	0.05264	0.576033	0.992615	3	Deleterious	0.673549	Neutral	1	Possibly damaging	0.766	0	Neutral	1	Deleterious	0.51
1	170688909	G	A	34	0.71	0.99025	0.573888	0.999603	2	Neutral	0.0107531	Disease	6	Benign	0.984	0	Neutral	1	Deleterious	0.61
7	37382282	C	T	16.31	0.34	0.81745	0.709663	0.993678	3	Neutral	0.0351856	Neutral	9	Benign	0.994	0.09	Neutral	5	Neutral	0.65
19	36122298	C	T	34	0.26	0.7981	0.724815	0.999208	4	Deleterious	0.514686	Neutral	5	Benign	0.996	0.03	Non-neutral	1	Deleterious	0.55
11	56230174	G	A	24.5	0.22	0.94515	0.573888	0.999073	2	Neutral	0.00970295	Disease	1	Benign	0.6	0.03	Neutral	0	Deleterious	0.55
1	248436456	C	A	10.82	0.14	0.00164	0.573888	0.893776	1	Deleterious	0.988592	Neutral	9	Benign	0.974	0.11	Neutral	6	Neutral	0.74
3	10400425	C	T	23.9	0.33	0.97692	0.547309	0.998726	3	Deleterious	0.400204	Disease	8	Benign	0.988	0.09	Non-neutral	0	Neutral	0.6
4	169282355	T	C	0.006	0.19	0.0051	0.618467	0.361279	1	Neutral	0.0756801	Neutral	9	Benign	0.962	0.16	Neutral	1	Neutral	0.68
2	46203604	G	A	24.1	0.35	0.98834	0.547309	0.99837	4	Neutral	0.00149995	Neutral	3	Benign	0.836	0.53	Neutral	6	Neutral	0.65
16	83999082	C	T	13.59	0.37	0.97894	0.576033	0.997123	4	Deleterious	0.511127	Neutral	2	Possibly damaging	0.944	0	Neutral	0	Deleterious	0.51
11	68478511	T	A	32	0.49	0.99168	0.688494	0.988533	2	Neutral	0.0301721	Disease	8	Benign	0.998	0	Non-neutral	1	Deleterious	0.87
15	88576210	A	G	17.22	0.4	0.89313	0.658983	0.82012	4	Deleterious	0.398702	Neutral	7	Benign	1	1	Neutral	7	Neutral	0.75
6	167708152	G	A	23.8	0.2	0.74825	0.547309	0.985649	2	Deleterious	0.15172	Neutral	7	Benign	0.076	0.14	Neutral	5	Neutral	0.83
1	6532669	C	A	20.3	0.58	0.80582	0.854111	0.998378	2	Deleterious	0.572951	Disease	4	Benign	0.004	0.01	Non-neutral	1	Neutral	0.6
1	202464749	G	A	34	0.59	0.97804	0.608884	0.999495	4	Deleterious	0.510936	Neutral	8	Benign	1	0.12	Neutral	2	Neutral	0.63
7	26224208	C	G	14.4	0.34	0.00266	0.606735	0.986931	3	Deleterious	0.975719	Neutral	7	Benign	0.976	0.06	Neutral	2	Neutral	0.63
21	45821601	C	T	23.3	0.13	0.90631	0.578056	0.998777	3	Neutral	0.0133976	Disease	4	Benign	0.916	0.01	Neutral	2	Deleterious	0.55
17	41004823	G	A	2.621	0.37	0.02013	0.658983	0.982143	1	Deleterious	0.841446	Disease	4	Benign	0.04	0.01	Non-neutral	1	Neutral	0.6
19	6928195	C	G	26.1	0.22	0.86083	0.573888	0.99832	2	Deleterious	0.199748	Disease	5	Possibly damaging	0.938	0	Non-neutral	2	Deleterious	0.72
19	52272072	G	A	18.86	0.34	0.52594	0.618467	0.998286	2	Deleterious	0.871231	Disease	2	Benign	0.75	0.11	Neutral	1	Neutral	0.65
10	133107541	G	A	22.1	0.25	0.88054	0.653264	0.996936	3	Deleterious	0.168826	Neutral	8	Possibly damaging	0.994	0.01	Neutral	0	Neutral	0.6
3	126153142	G	A	19.29	0.3	0.79727	0.408882	0.99907	2	Deleterious	0.373725	Disease	5	Benign	0.998	0.01	Neutral	4	Deleterious	0.61
17	62518978	G	A	0.007	0.57	0.01394	0.702456	0.525039	1	Deleterious	0.674653	Neutral	6	Benign	0.864	0.28	Neutral	6	Neutral	0.74
1	40235523	C	T	18.85	0.24	0.68682	0	0.999036	2	Neutral	0.0060537	Disease	8	Benign	1	0	Non-neutral	1	Deleterious	0.87
4	10445888	G	T	14.6	0.35	0.36907	0.709663	0.989275	2	Neutral	0.0931237	Neutral	8	Benign	0.046	0.18	Neutral	0	Neutral	0.74
4	36121276	G	A	24.7	0.41	0.99298	0.602189	0.997616	3	Deleterious	0.131239	Neutral	2	Benign	0.138	0.01	Neutral	1	Neutral	0.74
17	72838649	C	A	14.73	0.25	0.13463	0.503968	0.990961	2	Deleterious	0.981266	Neutral	6	Benign	0.998	0.05	Non-neutral	0	Neutral	0.6
14	23898270	C	T	9.621	0.27	0.08677	0.59043	0.605708	2	Deleterious	0.999911	Disease	1	Benign	1	1	Neutral	3	Neutral	0.63
19	55556532	A	T	17.72	0.33	0.90324	0.697927	0.996946	1	Deleterious	0.157975	Disease	3	Benign	0.582	0	Non-neutral	0	Deleterious	0.55
17	42161201	T	C	17.29	0.51	0.93362	0.723109	0.998276	4	Deleterious	0.331339	Disease	5	Benign	0.988	0	Neutral	5	Deleterious	0.61
16	53528998	T	A	22.4	0.6	0.99295	0.575934	0.995262	3	Neutral	0.0173423	Disease	8	Benign	0.968	0	Non-neutral	1	Deleterious	0.87
1	225965692	T	G	19.82	0.43	0.82466	0.52208	0.997257	3	Neutral	9.70106e-07	Disease	6	Benign	0.998	0	Non-neutral	4	Deleterious	0.87
11	129780409	G	A	18.41	0.43	0.99339	0	0.99933	3	Neutral	0.0187702	Neutral	4	Benign	1	0	Non-neutral	2	Deleterious	0.76
1	179887258	C	G	20.6	0.37	0.1896	0.724815	0.840965	4	Neutral	0.0919785	Neutral	7	Benign	0.544	0.2	Neutral	2	Neutral	0.71
15	90119187	C	A	21.8	0.22	0.92043	0.52208	0.994547	2	Deleterious	0.379031	Neutral	8	Possibly damaging	0.982	0.29	Neutral	1	Neutral	0.65
12	53663124	G	A	9.017	0.37806	0.07344	0.696144	0.916286	1	Deleterious	0.654268	Neutral	7	Benign	0.994	0.26	Neutral	4	Neutral	0.74
14	30194796	C	T	24.4	0.56	0.69871	0.658983	0.999043	4	Deleterious	0.452219	Neutral	5	Benign	0.836	0	Neutral	5	Neutral	0.63
22	21354970	C	G	7.632	0.27	0.00926	0.685571	0.482822	3	Deleterious	0.741937	Neutral	10	Benign	0.998	1	Neutral	7	Neutral	0.74
17	38950178	C	T	33	0.14	0.88991	0.547309	0.999278	3	Deleterious	0.197276	Disease	4	Possibly damaging	0.996	0	Neutral	0	Deleterious	0.61
11	64502600	C	T	23.8	0.54	0.95001	0.644132	0.998342	3	Deleterious	0.982149	Neutral	7	Benign	0.69	0.44	Neutral	2	Neutral	0.74
1	12820858	C	T	14.08	0.27	0.04619	0.547309	0.945089	1	Deleterious	0.119203	Disease	1	Benign	0.946	0.12	Non-neutral	0	Neutral	0.6
21	45655355	C	A	22.1	0.14	0.04871	0.645312	0.931493	1	Deleterious	0.19828	Neutral	3	Benign	1	0.01	Neutral	5	Deleterious	0.51
13	29252186	G	A	35	0.53	0.97153	0.709663	0.998987	3	Neutral	0.0833314	Disease	1	Benign	1	0	Non-neutral	3	Deleterious	0.87
18	48703398	G	A	28.7	0.56	0.96053	0.702456	0.999244	0	Neutral	0.0130096	Neutral	3	Benign	1	0.05	Neutral	3	Deleterious	0.61
2	26533658	G	A	21.3	0.43	0.98594	0.679469	0.999198	2	Deleterious	0.372202	Disease	4	Benign	1	0	Non-neutral	0	Deleterious	0.72
6	30916653	C	T	6.492	0.455275	0.11713	0.547309	0.997707	2	Neutral	0.0266477	Neutral	4	Benign	1	0.01	Non-neutral	1	Deleterious	0.76
20	20140041	G	A	13.46	0.6	0.0844	0.573888	0.854868	2	Deleterious	0.322946	Neutral	4	Benign	0.652	0.66	Neutral	1	Neutral	0.74
9	107645431	G	A	35	0.43	0.99075	0.536957	0.999497	4	Neutral	0.00734735	Disease	2	Benign	1	0	Non-neutral	3	Deleterious	0.87
17	39661532	C	T	14.37	0.2	0.46215	0.547309	0.687824	3	Deleterious	0.980844	Disease	1	Benign	0.396	0.37	Neutral	6	Neutral	0.74
2	225706579	T	C	25.8	0.66	0.98713	0.573888	0.998814	2	Deleterious	0.118573	Neutral	5	Benign	0.144	0	Neutral	2	Neutral	0.75
10	105939630	C	T	13	0.28	0.0357	0.618467	0.982828	2	Deleterious	0.598986	Neutral	6	Possibly damaging	0.932	0.08	Non-neutral	2	Neutral	0.6
9	130828906	C	T	22.4	0.61	0.66468	0.662677	0.997389	4	Deleterious	0.108518	Neutral	7	Benign	0.99	0.27	Neutral	6	Neutral	0.74
11	123777554	G	T	15.15	0.15	0.12929	0.618467	0.950558	1	Deleterious	0.49684	Neutral	5	Benign	0.03	0	Non-neutral	2	Deleterious	0.51
6	47221138	C	T	31	0.49	0.97347	0.709663	0.999083	4	Deleterious	0.836801	Disease	3	Benign	1	0	Non-neutral	5	Deleterious	0.72
1	162313638	G	A	19.39	0.26	0.98818	0.659464	0.996016	3	Deleterious	0.987306	Neutral	4	Benign	0.606	0.01	Neutral	1	Neutral	0.65
3	9786820	G	A	22.3	0.64	0.96662	0.743671	0.968062	3	Deleterious	0.266107	Neutral	6	Possibly damaging	0.624	0.65	Neutral	2	Neutral	0.65
15	23006806	G	C	16.41	0.4	0.79612	0.724815	0.994392	2	Neutral	0.0209005	Neutral	5	Benign	0.888	0	Neutral	3	Neutral	0.6
13	21364662	G	A	29.1	0.8	0.99008	0.643519	0.998871	2	Deleterious	0.369074	Neutral	3	Possibly damaging	0.976	0.04	Neutral	0	Neutral	0.6
6	24784350	G	C	32	0.45	0.99692	0.724815	0.998645	3	Neutral	0.00268494	Neutral	5	Benign	1	0	Neutral	1	Deleterious	0.61
5	42689025	G	A	34	0.394432	0.94685	0.573888	0.99938	4	Neutral	0.0690895	Disease	8	Benign	1	0.01	Non-neutral	3	Deleterious	0.87
6	43578395	C	G	19.25	0.4	0.51005	0.608884	0.848334	3	Deleterious	0.885522	Neutral	7	Benign	0.998	0.36	Neutral	3	Neutral	0.75
11	118452073	T	C	18.22	0.47	0.98927	0.709663	0.999181	4	Neutral	2.8817e-06	Disease	9	Benign	1	0	Non-neutral	4	Deleterious	0.87
10	73767705	G	A	32	0.44	0.9329	0.645312	0.998905	2	Neutral	0.0667901	Neutral	0	Possibly damaging	0.996	0	Neutral	1	Deleterious	0.61
6	155750162	C	T	22.6	0.18	0.72708	0.547309	0.972425	3	Deleterious	0.204199	Disease	2	Benign	0.964	0.14	Neutral	2	Neutral	0.63
20	47570183	C	T	23.3	0.51	0.40653	0.724815	0.994443	4	Neutral	0.0115928	Neutral	6	Benign	0.328	0.18	Neutral	1	Neutral	0.63
15	42717043	G	T	22.2	0.51	0.99627	0.724815	0.989876	2	Deleterious	0.312386	Neutral	8	Benign	1	0	Non-neutral	2	Deleterious	0.51
15	88476382	C	T	26.9	0.53	0.97716	0.618467	0.999328	4	Deleterious	0.925491	Disease	3	Possibly damaging	0.998	0	Neutral	2	Deleterious	0.61
14	57876098	T	C	25.6	0.48	0.97694	0.724815	0.998223	2	Neutral	0.000130683	Disease	4	Benign	0.49	0	Non-neutral	0	Deleterious	0.61
1	200573013	C	T	32	0.54	0.98774	0.743671	0.998568	4	Neutral	6.40022e-05	Disease	6	Benign	1	0	Non-neutral	5	Deleterious	0.87
8	10465962	C	A	0.178	0.2	0.00495	0.547309	0.669197	1	Neutral	0.0127221	Neutral	9	Benign	0.994	0.52	Neutral	0	Neutral	0.65
9	117666494	A	C	27.9	0.29	0.90718	0.547309	0.994296	3	Neutral	0.000403555	Disease	2	Benign	0.994	0	Non-neutral	4	Deleterious	0.87
18	12125664	C	A	17.43	0.27	0.55832	0.547309	0.907575	1	Neutral	0.000590997	Disease	8	Benign	0.982	0	Neutral	0	Deleterious	0.76
7	44186153	C	T	18.29	0.41	0.88829	0.608004	0.99853	2	Neutral	0.0235597	Neutral	6	Benign	0.84	0	Neutral	7	Neutral	0.6
12	26220619	G	C	22.4	0.53	0.96255	0.709663	0.99547	4	Deleterious	0.93595	Neutral	8	Benign	0.834	0.37	Neutral	2	Neutral	0.74
11	62520194	C	G	27.7	0.43	0.9844	0.697927	0.996767	3	Deleterious	0.669134	Neutral	9	Benign	0.992	0.02	Neutral	1	Neutral	0.65
19	49973630	C	T	1.938	0.3	0.01141	0.630245	0.661371	2	Neutral	3.67322e-05	Neutral	7	Benign	0.994	0.29	Neutral	1	Neutral	0.63
5	36035966	G	A	4.72	0.32	0.07492	0.691618	0.983477	2	Deleterious	0.523688	Neutral	5	Possibly damaging	0.954	0	Neutral	1	Neutral	0.6
5	86627205	C	T	35	0.76	0.9722	0.709663	0.999246	4	Deleterious	0.265231	Neutral	2	Benign	1	0	Non-neutral	2	Deleterious	0.61
9	19096745	G	A	33	0.53	0.91042	0.743671	0.999196	2	Neutral	0.00941633	Neutral	5	Benign	1	0	Non-neutral	1	Deleterious	0.72
2	208489096	C	T	20.5	0.49	0.90023	0.504199	0.999268	2	Deleterious	0.452814	Neutral	6	Benign	1	0	Neutral	5	Deleterious	0.51
7	95115410	G	A	32	0.4	0.98928	0.573888	0.999294	3	Deleterious	0.517413	Neutral	3	Benign	0.568	0.05	Neutral	3	Neutral	0.74
2	99936193	C	A	22.2	0.59	0.96517	0.65145	0.996794	3	Deleterious	0.828664	Neutral	4	Benign	0.554	0.15	Neutral	3	Neutral	0.74
9	139693602	A	T	14.67	0.51	0.48969	0.606884	0.991252	2	Neutral	0.00159082	Neutral	7	Possibly damaging	0.878	0.02	Neutral	0	Deleterious	0.55
2	85780536	C	T	6.189	0.13	0.01155	0.693117	0.602255	2	Deleterious	0.931205	Neutral	8	Benign	0.984	0.66	Neutral	5	Neutral	0.74
7	77325866	G	A	10.07	0.42	0.03802	0.52208	0.974607	2	Deleterious	0.110038	Neutral	6	Possibly damaging	0.586	0.01	Neutral	1	Neutral	0.6
11	66461675	G	A	34	0.63	0.89808	0.702456	0.99929	3	Neutral	0.00754831	Disease	7	Benign	1	0	Non-neutral	2	Deleterious	0.87
8	86049720	G	A	21.9	0.48	0.92004	0.658983	0.984124	1	Deleterious	0.748601	Neutral	5	Possibly damaging	0.578	0.04	Neutral	1	Neutral	0.6
14	47530637	C	T	35	0.42	0.98776	0.573888	0.999346	2	Deleterious	0.677283	Neutral	1	Benign	1	0.02	Non-neutral	2	Deleterious	0.61
16	87446552	T	C	23.8	0.28	0.99628	0.743671	0.998813	3	Deleterious	0.837204	Neutral	8	Possibly damaging	0.998	0.16	Non-neutral	0	Neutral	0.6
6	101127606	C	T	33	0.35	0.93061	0.709663	0.999616	2	Neutral	0.0786118	Disease	6	Benign	0.99	0	Non-neutral	3	Deleterious	0.87
8	69621293	G	A	22.7	0.64	0.87576	0.573888	0.998842	2	Deleterious	0.235628	Neutral	8	Benign	0.954	0.7	Neutral	2	Neutral	0.74
11	6221277	C	A	20.2	0.27	0.71527	0.547309	0.993283	2	Deleterious	0.412708	Disease	2	Benign	1	0	Non-neutral	1	Deleterious	0.72
2	242147045	G	C	12.24	0.28	0.96404	0.603688	0.991431	2	Deleterious	0.243077	Disease	8	Possibly damaging	1	0.01	Non-neutral	2	Deleterious	0.72
3	39142301	G	T	14.88	0.47	0.89207	0.743671	0.992074	3	Deleterious	0.303665	Neutral	4	Benign	0.864	0	Neutral	1	Neutral	0.63
6	137041602	G	C	17.46	0.44	0.93637	0.653264	0.99662	3	Deleterious	0.209325	Neutral	6	Benign	0.778	0.11	Neutral	1	Neutral	0.74
10	49642950	C	A	18.03	0.39	0.98913	0.644132	0.91679	4	Deleterious	0.242947	Neutral	9	Benign	0.984	0.74	Neutral	2	Neutral	0.74
19	54760357	G	A	6.597	0.19	0.00195	0.657636	0.166678	3	Deleterious	0.999997	Neutral	10	Benign	1	1	Neutral	7	Neutral	0.75
4	57181043	G	A	6.771	0.35	0.16256	0.570548	0.99238	1	Deleterious	0.654988	Neutral	4	Benign	0.978	0.07	Neutral	1	Neutral	0.74
11	75316932	C	T	5.342	0.25	0.12726	0.547309	0.965599	1	Deleterious	0.118929	Neutral	8	Benign	0.978	0.8	Neutral	7	Neutral	0.74
7	100284381	G	C	20.6	0.63	0.90547	0.702456	0.997169	1	Deleterious	0.198858	Neutral	4	Benign	0.776	0.06	Non-neutral	2	Neutral	0.63
4	188924380	C	T	19.16	0.38	0.21031	0.702456	0.994362	3	Deleterious	0.344034	Disease	3	Possibly damaging	0.96	0.01	Neutral	3	Deleterious	0.55
8	48889249	A	G	17.44	0.55	0.89038	0.702456	0.632082	4	Deleterious	0.723	Neutral	9	Benign	0.998	1	Neutral	7	Neutral	0.74
6	127837705	C	T	15.15	0.51	0.0238	0.47417	0.990436	2	Neutral	0.00930576	Neutral	5	Possibly damaging	0.912	0.03	Neutral	1	Deleterious	0.55
1	74492586	C	T	5.093	0.34	0.02343	0.573888	0.846274	2	Deleterious	0.137523	Neutral	7	Benign	0.908	0.01	Neutral	3	Neutral	0.65
4	9982290	G	T	24.3	0.42	0.96346	0.59043	0.989805	2	Neutral	0.000492449	Disease	8	Possibly damaging	0.742	0.08	Neutral	0	Deleterious	0.61
5	141336847	C	A	17.74	0.28	0.63913	0.602189	0.986684	1	Deleterious	0.307472	Neutral	3	Benign	0.992	0.17	Neutral	5	Neutral	0.75
10	117026389	G	A	29.9	0.7	0.99185	0.547309	0.999344	3	Neutral	0.00931459	Disease	1	Possibly damaging	0.762	0	Neutral	0	Deleterious	0.76
6	146350703	C	T	18.12	0.32	0.02093	0.573078	0.861664	4	Deleterious	0.809828	Neutral	7	Benign	0.998	0.59	Neutral	5	Neutral	0.75
2	80530626	C	A	21.8	0.57	0.86753	0.666236	0.99114	2	Deleterious	0.217464	Disease	1	Benign	0.15	0.02	Neutral	0	Neutral	0.63
14	50750699	A	C	28.2	0.43	0.98331	0.709663	0.997	2	Neutral	0.0313714	Disease	7	Benign	0.986	0	Non-neutral	1	Deleterious	0.87
11	64603009	C	T	14.22	0.32	0.01369	0.723109	0.818537	3	Deleterious	0.501833	Neutral	7	Benign	0.994	0.22	Neutral	4	Neutral	0.74
12	50186508	A	G	24	0.36	0.59618	0.570548	0.99869	2	Neutral	0.0158462	Neutral	5	Benign	0.988	0.33	Neutral	3	Neutral	0.6
20	10030446	C	T	14.87	0.45	0.97943	0.653264	0.99763	2	Deleterious	0.901032	Neutral	1	Possibly damaging	0.916	0	Neutral	1	Deleterious	0.51
1	232650179	C	T	32	0.41	0.98145	0.658983	0.999139	2	Deleterious	0.783346	Neutral	4	Possibly damaging	0.96	0.05	Non-neutral	1	Deleterious	0.55
15	76254290	G	A	26.4	0.46	0.93328	0.573888	0.996513	3	Neutral	0.000425365	Disease	7	Benign	0.99	0.04	Non-neutral	3	Deleterious	0.87
12	133420655	T	G	22.4	0.25	0.65489	0.724815	0.974567	2	Neutral	0.000481776	Disease	2	Benign	0.978	0.01	Neutral	5	Deleterious	0.65
3	113955200	C	G	10.26	0.2	0.54395	0.578056	0.986951	1	Neutral	0.0974237	Neutral	4	Possibly damaging	0.896	0.01	Non-neutral	0	Deleterious	0.65
9	114359624	C	A	15.21	0.52	0.07205	0.688494	0.868043	1	Deleterious	0.908192	Neutral	7	Benign	1	0.7	Neutral	8	Neutral	0.75
17	65026969	C	T	22.5	0.36	0.98837	0.645312	0.999064	3	Deleterious	0.244248	Disease	2	Benign	1	0	Neutral	3	Deleterious	0.61
15	45396172	G	T	27.7	0.57	0.911	0.577349	0.997698	3	Deleterious	0.300316	Neutral	4	Benign	0.706	0.01	Non-neutral	2	Neutral	0.6
16	27761525	C	T	29.8	0.51	0.97315	0.658983	0.999221	3	Neutral	0.000514372	Disease	6	Benign	1	0	Non-neutral	5	Deleterious	0.87
12	100482737	T	C	22.5	0.66	0.96228	0.658983	0.441848	3	Deleterious	0.974296	Neutral	8	Benign	0.998	1	Neutral	5	Neutral	0.74
3	138374301	G	A	33	0.7	0.99298	0.743671	0.999026	4	Deleterious	0.120268	Neutral	0	Possibly damaging	0.998	0	Non-neutral	0	Deleterious	0.61
6	52319011	G	A	23.9	0.54	0.84494	0.709663	0.997476	2	Deleterious	0.923676	Neutral	7	Benign	0.538	0.38	Neutral	3	Neutral	0.75
14	79175585	G	A	20.4	0.48	0.97934	0.602189	0.999519	3	Deleterious	0.744756	Disease	6	Benign	0.998	0	Non-neutral	2	Deleterious	0.72
5	139741747	C	A	22.3	0.25	0.90818	0.547309	0.99165	2	Neutral	0.0853689	Disease	0	Benign	0.19	0	Neutral	2	Deleterious	0.61
14	78392252	C	T	27.3	0.33	0.98205	0.709663	0.998865	4	Neutral	0.0557263	Disease	3	Benign	0.68	0.01	Neutral	0	Deleterious	0.55
10	76803567	T	G	3.896	0.15	0.04525	0	0.796107	1	Deleterious	0.480698	Neutral	1	Benign	1	0.24	Neutral	5	Neutral	0.75
11	64519471	C	T	34	0.51	0.94162	0.723109	0.999303	4	Deleterious	0.139369	Disease	6	Benign	0.998	0	Non-neutral	3	Deleterious	0.76
17	73627235	G	A	22.3	0.230012	0.9513	0.723109	0.972695	2	Neutral	0.0386216	Neutral	3	Benign	1	0	Non-neutral	3	Deleterious	0.76
20	49626736	C	T	17.77	0.29	0.76566	0.645312	0.993976	3	Deleterious	0.603597	Neutral	9	Benign	0.996	0.29	Neutral	4	Neutral	0.74
10	12077380	C	A	25.9	0.58	0.99233	0.709663	0.980047	4	Neutral	0.00338284	Neutral	9	Benign	0.984	0	Non-neutral	3	Deleterious	0.65
20	31386409	G	A	32	0.39	0.8349	0.697927	0.999406	4	Deleterious	0.147216	Disease	1	Benign	0.98	0	Neutral	6	Neutral	0.6
1	186375259	C	T	22.2	0.37	0.78738	0.658983	0.998531	2	Deleterious	0.338935	Disease	5	Benign	0.822	0	Non-neutral	0	Deleterious	0.55
18	61582857	C	T	22.6	0.21	0.10953	0.573888	0.9946	1	Neutral	0.0361312	Disease	8	Benign	0.94	0	Neutral	0	Deleterious	0.76
4	121732575	C	T	21.2	0.23	0.89762	0.658983	0.99825	2	Deleterious	0.129049	Neutral	3	Benign	0.406	0.1	Neutral	4	Neutral	0.83
11	62373378	C	A	22.2	0.65	0.91118	0.709663	0.996741	3	Deleterious	0.98468	Disease	1	Possibly damaging	0.892	0.36	Neutral	4	Neutral	0.6
8	30999280	G	T	1.149	0.34	0.00121	0.743671	0.229404	3	Deleterious	0.800973	Neutral	9	Benign	1	0.73	Neutral	7	Neutral	0.75
9	131515630	C	G	22	0.39	0.96898	0.709663	0.989332	3	Deleterious	0.361508	Neutral	5	Benign	0.25	0.1	Neutral	1	Neutral	0.75
3	184922264	G	A	22.9	0.46	0.93814	0.653264	0.998473	3	Deleterious	0.58001	Neutral	3	Benign	0.66	0.05	Neutral	5	Neutral	0.71
19	54756368	C	A	3.963	0.14	0.00691	0.576033	0.975283	2	Neutral	0.00166195	Disease	4	Possibly damaging	0.978	0	Neutral	2	Deleterious	0.76
5	175392006	C	T	22.9	0.46	0.97551	0.724815	0.996613	3	Deleterious	0.73759	Disease	5	Benign	0.598	0.05	Neutral	6	Neutral	0.6
3	119305195	C	T	25.4	0.19	0.97884	0.658983	0.999127	3	Neutral	0.000521137	Disease	2	Benign	1	0	Neutral	0	Deleterious	0.76
3	112724550	T	C	2.406	0.53	0.05051	0.702456	0.439805	1	Deleterious	0.138798	Neutral	9	Benign	1	0.37	Neutral	5	Neutral	0.75
19	36230212	T	A	14.71	0.28	0.76576	0	0.993002	1	Neutral	0.00118683	Neutral	0	Benign	1	0	Non-neutral	3	Deleterious	0.79
7	100211234	C	T	22.8	0.32	0.43816	0.709663	0.996462	3	Neutral	0.0882843	Neutral	8	Benign	0.824	0.03	Neutral	4	Neutral	0.63
16	89656340	G	A	24	0.23	0.77786	0.570548	0.52149	3	Deleterious	0.982036	Neutral	1	Benign	0.052	0.91	Neutral	4	Neutral	0.83
11	65144347	G	C	12.58	0.41	0.73025	0.602189	0.74069	3	Deleterious	0.116939	Neutral	7	Benign	0.96	0.23	Neutral	4	Neutral	0.74
1	63300473	C	T	28.8	0.62	0.95283	0.709663	0.997871	4	Neutral	2.83238e-05	Disease	8	Benign	1	0	Non-neutral	4	Deleterious	0.87
3	48474471	T	A	12.18	0.33	0.6074	0.67197	0.803876	1	Deleterious	0.703313	Neutral	5	Benign	0.884	0.03	Neutral	5	Neutral	0.68
10	50966551	G	A	22.4	0.32	0.25441	0.696353	0.992788	3	Deleterious	0.769705	Neutral	6	Possibly damaging	0.98	0.08	Non-neutral	2	Neutral	0.6
7	106508904	G	A	24	0.42	0.9832	0.573888	0.982641	4	Deleterious	0.283192	Disease	0	Benign	0.728	0.36	Neutral	0	Neutral	0.65
21	30380286	G	A	8.146	0.68	0.55088	0.653264	0.900903	3	Deleterious	0.556135	Neutral	5	Benign	0.994	0.09	Neutral	3	Neutral	0.75
22	43831034	C	T	25.6	0.41	0.97333	0.578056	0.998177	2	Deleterious	0.239934	Neutral	4	Possibly damaging	1	0.05	Neutral	4	Neutral	0.6
11	8248558	T	C	18.24	0.3	0.9777	0.467745	0.99847	2	Neutral	1.09769e-06	Disease	9	Benign	1	0	Non-neutral	6	Deleterious	0.87
19	47876160	G	A	13.32	0.26	0.08111	0.702456	0.906646	3	Deleterious	0.977604	Neutral	4	Benign	0.99	0.32	Neutral	5	Neutral	0.74
5	131539494	G	A	22.2	0.41	0.95184	0.659464	0.998922	3	Neutral	0.0300386	Disease	1	Benign	0.99	0.01	Non-neutral	0	Deleterious	0.87
12	6128067	G	A	27.6	0.38	0.99336	0.602189	0.999041	3	Neutral	0.00030139	Disease	7	Benign	1	0.01	Non-neutral	4	Deleterious	0.76
4	71468348	G	T	0.004	0.19	0.00946	0.547309	0.474514	1	Deleterious	0.481138	Neutral	6	Benign	0.958	0.38	Neutral	5	Neutral	0.74
5	68695940	T	G	29.7	0.59	0.98004	0.743671	0.99803	3	Neutral	0.000129522	Disease	2	Benign	1	0	Neutral	3	Deleterious	0.76
13	113917835	T	A	33	0.75	0.98778	0.724815	0.966626	4	Neutral	5.92716e-06	Disease	9	Benign	0.998	0	Non-neutral	2	Deleterious	0.87
3	13612957	G	A	0.001	0.28	0.00388	0.723109	0.775113	2	Deleterious	0.10149	Neutral	8	Benign	0.976	0.56	Neutral	6	Neutral	0.74
6	110300407	C	T	11.98	0.46	0.01167	0.608004	0.997256	3	Deleterious	0.856686	Neutral	8	Benign	0.994	0.95	Neutral	0	Neutral	0.74
11	45926284	C	T	22.3	0.47	0.91093	0.697927	0.999171	4	Neutral	0.0146221	Neutral	4	Benign	1	0	Non-neutral	2	Deleterious	0.76
2	74755126	G	A	21.7	0.47	0.90248	0.702456	0.998135	2	Neutral	0.0201968	Neutral	6	Benign	0.798	0.02	Neutral	0	Deleterious	0.55
1	27948152	C	T	20.4	0.41	0.90306	0.491513	0.996895	4	Deleterious	0.911648	Neutral	5	Benign	0.996	1	Neutral	4	Neutral	0.74
14	76620905	T	A	26.6	0.56	0.9693	0.698795	0.996519	2	Neutral	0.000171826	Neutral	6	Possibly damaging	1	0	Non-neutral	3	Deleterious	0.72
7	36338750	G	A	12.13	0.36	0.19061	0.80507	0.982851	2	Deleterious	0.401594	Neutral	9	Benign	0.988	0.21	Neutral	3	Neutral	0.74
7	121943265	C	A	22.8	0.35	0.96867	0.851219	0.997205	2	Deleterious	0.129628	Neutral	2	Benign	0.998	0	Non-neutral	2	Deleterious	0.51
4	37446702	A	G	18.65	0.65	0.96078	0.547309	0.996986	2	Deleterious	0.495116	Neutral	2	Benign	0.566	0.23	Neutral	6	Neutral	0.74
3	47045638	C	T	35	0.37	0.93642	0.643519	0.999312	2	Deleterious	0.272155	Disease	6	Benign	1	0	Non-neutral	0	Deleterious	0.72
10	30336525	G	A	10.99	0.29	0.22932	0.602189	0.989947	1	Deleterious	0.194123	Neutral	5	Benign	0.934	0.16	Non-neutral	2	Neutral	0.63
16	75203805	A	G	16.3	0.48	0.2191	0.724815	0.998623	3	Deleterious	0.766362	Neutral	3	Benign	0.172	0.01	Neutral	0	Neutral	0.74
14	32563189	C	T	23.7	0.59	0.51945	0.608884	0.992385	4	Deleterious	0.558783	Neutral	7	Possibly damaging	0.51	0.02	Non-neutral	0	Deleterious	0.51
8	143960599	C	T	5.414	0.15	0.00423	0.573888	0.934666	2	Deleterious	0.933788	Neutral	4	Benign	0.978	0.38	Neutral	3	Neutral	0.74
9	71628589	G	T	1.283	0.24	0.09924	0.578056	0.707429	3	Deleterious	0.182588	Disease	5	Possibly damaging	0.978	0.02	Neutral	2	Deleterious	0.61
16	22237114	G	C	13.84	0.35	0.25392	0.658105	0.955472	4	Neutral	0.00816703	Neutral	8	Benign	0.998	0.23	Neutral	2	Neutral	0.6
8	101661534	G	A	35	0.22	0.87396	0.503968	0.999317	2	Neutral	9.07977e-05	Disease	9	Benign	1	0	Non-neutral	6	Deleterious	0.87
7	148801543	C	T	18.75	0.1	0.02359	0.663124	0.98419	3	Deleterious	0.178292	Neutral	4	Benign	0.506	0.11	Non-neutral	0	Neutral	0.65
3	31705656	C	T	24.6	0.21	0.69296	0.709663	0.998812	3	Deleterious	0.888418	Neutral	8	Benign	0.582	0.17	Neutral	2	Neutral	0.74
16	601555	G	A	19.92	0.31	0.9935	0.723109	0.998752	2	Deleterious	0.154191	Disease	5	Benign	1	0	Non-neutral	2	Deleterious	0.76
2	177036352	C	T	21.7	0.3	0.93237	0.606814	0.999186	4	Neutral	0.0294271	Neutral	4	Benign	1	0	Neutral	7	Deleterious	0.61
14	31585523	T	C	22.2	0.5	0.97356	0.724815	0.998154	3	Deleterious	0.643017	Disease	5	Benign	0.192	0.19	Neutral	2	Neutral	0.75
2	20240757	T	A	20.3	0.51	0.46067	0.743671	0.970693	2	Deleterious	0.713771	Neutral	6	Benign	0.802	0.07	Neutral	5	Neutral	0.74
11	103908172	C	T	6.589	0.23	0.28024	0.573888	0.994695	1	Neutral	0.0431445	Neutral	8	Benign	0.73	0.02	Neutral	1	Deleterious	0.52
3	10183565	G	A	10.97	0.49	0.22431	0.52208	0.980462	4	Deleterious	0.265429	Neutral	3	Possibly damaging	0.466	0	Non-neutral	0	Deleterious	0.51
6	54804695	C	T	8.54	0.52	0.844	0.653264	0.988338	3	Deleterious	0.29946	Neutral	2	Benign	0.78	0.19	Neutral	1	Neutral	0.74
2	71871138	T	C	9.497	0.15	0.07749	0.688494	0.775267	2	Deleterious	0.471451	Neutral	4	Benign	1	1	Neutral	6	Neutral	0.75
14	35182132	G	A	20.4	0.4	0.84313	0.658983	0.88102	2	Neutral	0.0889464	Disease	1	Benign	0.844	0.29	Neutral	5	Neutral	0.61
4	151773168	C	A	12.95	0.45	0.17911	0.743671	0.984615	2	Deleterious	0.101348	Neutral	5	Possibly damaging	0.618	0.05	Non-neutral	0	Neutral	0.6
9	137309028	G	A	18	0.22	0.95669	0.570548	0.981244	4	Deleterious	0.388622	Neutral	5	Benign	0.788	0.48	Neutral	3	Neutral	0.74
6	144263313	C	T	17.8	0.49	0.46538	0.691665	0.99671	2	Deleterious	0.510941	Disease	6	Benign	0.872	0	Neutral	5	Neutral	0.6
15	82635183	A	C	14.68	0.484917	0.0912	0.573888	0.677046	1	Neutral	0.00511235	Disease	3	Benign	0.78	0	Neutral	4	Deleterious	0.55
6	30520272	C	A	22.2	0.39	0.87749	0.702456	0.99691	4	Deleterious	0.987569	Disease	3	Benign	0.192	0	Neutral	4	Neutral	0.63
2	69409751	C	T	22.5	0.47	0.9549	0.743671	0.998822	3	Deleterious	0.231962	Neutral	3	Benign	1	0.01	Non-neutral	2	Deleterious	0.51
17	73491026	C	G	22.5	0.42	0.9894	0.723109	0.84339	4	Neutral	0.00556056	Disease	1	Benign	1	0.05	Non-neutral	1	Deleterious	0.87
17	7134082	G	A	22.2	0.29	0.95415	0.643519	0.999356	4	Neutral	0.0466976	Neutral	3	Benign	0.812	0	Neutral	0	Neutral	0.6
9	117168916	G	T	25	0.37	0.96798	0.658983	0.997318	2	Neutral	0.000139609	Neutral	3	Benign	0.996	0	Neutral	0	Deleterious	0.61
12	106633569	C	G	25.5	0.51	0.7298	0.724815	0.995197	2	Neutral	0.00459275	Neutral	1	Possibly damaging	0.942	0.14	Non-neutral	1	Deleterious	0.61
2	207175899	G	A	2.773	0.35	0.04591	0.602189	0.507565	1	Deleterious	0.968911	Neutral	9	Benign	0.78	0.82	Neutral	3	Neutral	0.74
9	77431608	G	T	23.7	0.39	0.93271	0.618467	0.995846	3	Deleterious	0.420036	Disease	4	Benign	0.888	0	Neutral	4	Neutral	0.6
19	41518645	G	A	0.005	0.22	0.03282	0.685742	0.485526	1	Deleterious	0.310431	Neutral	7	Benign	1	0.55	Neutral	8	Neutral	0.75
19	12772078	G	A	11.74	0.22	0.05146	0.724815	0.985756	1	Neutral	0.0162509	Neutral	3	Possibly damaging	0.744	0.05	Neutral	2	Neutral	0.6
11	67219664	C	T	21.3	0.56	0.90041	0.578056	0.998562	3	Deleterious	0.998828	Neutral	2	Possibly damaging	1	0.38	Neutral	1	Neutral	0.63
19	16275555	C	T	24.4	0.28	0.9658	0.602189	0.991546	3	Deleterious	0.851359	Disease	0	Benign	0.95	0.19	Neutral	4	Neutral	0.65
9	20907219	G	A	32	0.5	0.95891	0.709663	0.999523	2	Deleterious	0.911566	Neutral	3	Possibly damaging	1	0.03	Non-neutral	3	Deleterious	0.61
2	183104837	C	T	27	0.55	0.94894	0.573888	0.996599	3	Deleterious	0.727798	Disease	0	Benign	0.93	0.09	Neutral	1	Neutral	0.65
10	127413975	A	G	25.6	0.67	0.99032	0.724815	0.997615	3	Deleterious	0.300062	Neutral	7	Benign	0.932	0.06	Neutral	0	Neutral	0.63
17	27861231	C	G	23.6	0.29	0.96569	0.724815	0.99561	4	Deleterious	0.688428	Neutral	7	Benign	0.146	0.1	Neutral	6	Neutral	0.83
6	136554632	G	A	28.2	0.6	0.94948	0.658983	0.998485	2	Neutral	0.0151867	Neutral	5	Benign	0.998	0	Neutral	2	Deleterious	0.61
21	44589331	C	T	23.8	0.35	0.92763	0.578056	0.999124	3	Deleterious	0.343428	Disease	5	Benign	0.812	0.03	Neutral	3	Neutral	0.6
17	61391751	C	T	22.2	0.56	0.97061	0.653264	0.999175	2	Neutral	0.0765156	Disease	1	Benign	0.72	0.02	Non-neutral	2	Deleterious	0.65
11	16208439	T	C	19.69	0.4	0.96187	0.547309	0.975154	3	Deleterious	0.965931	Neutral	5	Benign	1	0.43	Neutral	7	Neutral	0.75
19	54760520	C	T	21.3	0.13	0.02211	0.657636	0.993747	3	Neutral	0.0815457	Disease	8	Benign	0.178	0	Neutral	3	Deleterious	0.51
16	601394	C	T	15.93	0.22	0.98088	0.723109	0.998133	2	Neutral	0.0511516	Disease	6	Benign	0.97	0	Non-neutral	2	Deleterious	0.87
7	100192736	G	A	20.7	0.63	0.90838	0.696353	0.997685	3	Neutral	0.000517733	Neutral	6	Benign	0.988	0	Non-neutral	1	Deleterious	0.72
8	95522873	T	A	23.2	0.31	0.9862	0.724815	0.990273	3	Neutral	0.0393084	Neutral	0	Possibly damaging	0.284	0.08	Non-neutral	0	Neutral	0.6
19	45448533	C	T	7.328	0.22	0.02968	0.547309	0.981095	1	Neutral	0.00701735	Neutral	8	Benign	0.67	0.01	Non-neutral	4	Deleterious	0.64
9	21187311	C	T	4.094	0.19	0.02409	0.547309	0.844381	2	Deleterious	0.11608	Disease	2	Benign	0.996	0.11	Neutral	6	Neutral	0.63
16	22358911	G	A	17.92	0.55	0.70048	0.702456	0.989224	3	Deleterious	0.888183	Neutral	8	Benign	0.878	1	Neutral	8	Neutral	0.74
19	8551045	G	A	22.3	0.5	0.96875	0.702456	0.999419	3	Neutral	0.000238879	Disease	1	Benign	0.748	0	Neutral	5	Deleterious	0.55
6	54805688	A	C	15.59	0.39	0.02591	0.618467	0.829701	3	Deleterious	0.763276	Neutral	9	Possibly damaging	1	1	Neutral	6	Neutral	0.63
17	67210992	T	C	0.002	0.4	0.44383	0.060301	0.231719	1	Neutral	0.0309755	Neutral	6	Benign	0.956	0.92	Neutral	8	Neutral	0.68
14	95033573	C	T	8.324	0.17	0.0768	0.547309	0.99626	2	Deleterious	0.220642	Disease	5	Benign	1	0	Neutral	0	Deleterious	0.61
17	7134114	A	C	21.8	0.34	0.99328	0.643519	0.996328	4	Neutral	0.0048921	Disease	5	Possibly damaging	0.984	0	Non-neutral	2	Deleterious	0.87
2	27682592	G	T	22.3	0.58	0.99144	0.658983	0.994589	3	Neutral	0.00122238	Disease	4	Benign	1	0	Non-neutral	2	Deleterious	0.87
21	45826633	C	T	29.1	0.18	0.99132	0.602189	0.999293	3	Deleterious	0.50049	Neutral	3	Benign	0.998	0	Non-neutral	0	Deleterious	0.61
10	117061425	C	T	24.7	0.69	0.93535	0.618467	0.983967	3	Deleterious	0.222282	Neutral	4	Benign	0.188	0.07	Non-neutral	1	Neutral	0.75
2	168098326	C	T	28	0.55	0.9439	0.573888	0.998993	2	Neutral	0.0885948	Neutral	5	Benign	0.944	0.02	Non-neutral	0	Deleterious	0.51
3	185245344	C	A	19.78	0.48	0.87097	0.565031	0.996384	3	Deleterious	0.581052	Disease	4	Benign	0.994	0	Non-neutral	1	Deleterious	0.72
16	28883292	G	A	22.8	0.47	0.942	0.643519	0.994306	2	Deleterious	0.72103	Neutral	5	Benign	0.244	0.07	Non-neutral	1	Neutral	0.75
14	21025078	A	T	0.676	0.12	0.02401	0.547309	0.946396	1	Deleterious	0.233365	Neutral	5	Benign	0.876	0.07	Neutral	4	Neutral	0.74
2	136479545	C	T	25.4	0.5	0.988	0.724815	0.997604	3	Deleterious	0.339082	Neutral	6	Benign	0.992	0.14	Neutral	0	Neutral	0.75
1	15768966	C	T	0.001	0.23	0.02051	0.615948	0.243076	2	Deleterious	0.476753	Neutral	7	Benign	1	1	Neutral	7	Neutral	0.75
20	23807102	G	A	22.8	0.21	0.02881	0.547309	0.982148	1	Neutral	0.00018206	Disease	0	Possibly damaging	0.316	0.03	Neutral	1	Deleterious	0.61
1	184041968	C	A	23.1	0.54	0.92239	0.608884	0.980773	2	Neutral	0.0234927	Neutral	6	Benign	0.782	0.06	Neutral	0	Neutral	0.6
14	35222877	G	A	28.7	0.4	0.98456	0.709663	0.998882	3	Deleterious	0.104366	Disease	1	Benign	0.014	0	Neutral	0	Neutral	0.63
21	30949385	C	G	21.9	0.59	0.98243	0.573888	0.998568	3	Deleterious	0.954884	Neutral	2	Benign	0.878	0.21	Neutral	3	Neutral	0.74
10	135351261	G	C	1.323	0.38	0.07275	0.618467	0.711292	2	Deleterious	0.706059	Neutral	4	Benign	1	0.18	Neutral	5	Neutral	0.75
8	110131518	A	C	18.01	0.55	0.99439	0.574621	0.992091	3	Deleterious	0.580448	Neutral	8	Benign	0.226	0.05	Neutral	1	Neutral	0.83
1	235505516	C	T	23.9	0.57	0.98662	0.724815	0.997731	3	Deleterious	0.65575	Neutral	3	Benign	0.242	0.12	Neutral	2	Neutral	0.83
20	43851414	C	A	0.001	0.322238	0.00094	0.573888	0.187092	1	Deleterious	0.260442	Neutral	9	Benign	0.998	1	Neutral	3	Neutral	0.74
8	125990020	C	T	12.8	0.23	0.00037	0.573888	0.938021	3	Neutral	0.00534779	Neutral	6	Benign	0.988	0.01	Neutral	7	Neutral	0.6
4	155243546	C	T	15.05	0.26	0.61247	0.573888	0.962384	2	Deleterious	0.388789	Neutral	2	Benign	0.996	0.19	Neutral	0	Neutral	0.75
12	110236432	G	A	22	0.45	0.86714	0.601832	0.985425	3	Deleterious	0.970839	Neutral	8	Benign	0.904	0.08	Neutral	1	Neutral	0.74
18	20889653	G	A	9.158	0.49	0.0484	0.658983	0.595275	1	Deleterious	0.875438	Neutral	1	Possibly damaging	0.99	0.37	Non-neutral	0	Neutral	0.6
8	61775123	C	T	35	0.78	0.98769	0.724815	0.999013	2	Neutral	5.43469e-07	Neutral	4	Possibly damaging	0.998	0	Non-neutral	2	Deleterious	0.76
8	141669776	A	G	18.15	0.46	0.99393	0.702456	0.997883	4	Deleterious	0.564546	Disease	1	Possibly damaging	0.216	0	Neutral	0	Deleterious	0.51
19	35625566	G	T	18.82	0.54	0.88426	0.645312	0.957522	2	Deleterious	0.450766	Neutral	7	Benign	0.676	0.02	Neutral	5	Neutral	0.6
6	166580961	C	T	20.4	0.09	0.52575	0.666236	0.999449	2	Deleterious	0.707841	Neutral	6	Benign	0.934	0	Neutral	1	Deleterious	0.51
5	148207421	C	T	16.35	0.28	0.87507	0.590023	0.998218	3	Deleterious	0.283698	Disease	7	Benign	0.486	0.01	Neutral	0	Neutral	0.63
6	24489691	G	C	0.001	0.18	0.04117	0.658983	0.907612	1	Deleterious	0.465006	Neutral	8	Benign	0.936	0.17	Neutral	3	Neutral	0.74
3	119263484	C	T	0.002	0.259548	0.01141	0.547309	0.57752	1	Deleterious	0.998512	Neutral	9	Benign	0.86	0.6	Neutral	2	Neutral	0.74
10	91178104	G	A	21.9	0.38	0.95622	0.675528	0.997978	2	Neutral	5.83806e-07	Disease	6	Benign	0.998	0	Non-neutral	3	Deleterious	0.87
11	56086192	C	T	25	0.38	0.30622	0.573888	0.998705	2	Neutral	0.00822656	Disease	3	Benign	0.858	0	Non-neutral	2	Deleterious	0.87
3	44685458	G	C	13.75	0.52	0.00514	0.670488	0.977089	1	Deleterious	0.949097	Neutral	2	Benign	1	0.31	Neutral	3	Neutral	0.75
17	73839326	C	T	18.12	0.22	0.73832	0	0.996669	2	Deleterious	0.397448	Neutral	6	Benign	0.978	0.05	Neutral	5	Neutral	0.68
17	42225989	C	T	13.72	0.38	0.2328	0.724815	0.986122	3	Neutral	0.0166689	Neutral	6	Benign	0.146	0.06	Non-neutral	1	Neutral	0.6
16	16256896	C	T	16.57	0.21	0.81868	0.602189	0.979217	1	Deleterious	0.98978	Neutral	8	Benign	0.104	0.25	Neutral	5	Neutral	0.83
21	26978910	C	T	22.9	0.16	0.53001	0.662677	0.998387	3	Neutral	0.0619377	Disease	5	Benign	0.514	0.17	Neutral	0	Neutral	0.6
17	48615485	G	A	22.6	0.39	0.99123	0.645312	0.99945	3	Deleterious	0.916945	Disease	2	Benign	0.996	0.1	Non-neutral	2	Deleterious	0.55
15	85383145	C	G	4.022	0.24	0.15713	0.67347	0.732633	2	Deleterious	0.992093	Neutral	8	Benign	0.708	0.35	Non-neutral	0	Neutral	0.71
10	43602002	C	T	23.5	0.36	0.81343	0.49644	0.999109	4	Deleterious	0.162872	Neutral	4	Benign	0.952	0.03	Neutral	3	Neutral	0.65
15	42292334	C	T	11.07	0.26	0.07412	0.573888	0.984732	2	Neutral	0.0711394	Neutral	4	Possibly damaging	0.602	0.07	Neutral	5	Neutral	0.6
17	46685380	G	A	22.2	0.27	0.95987	0.596491	0.999099	4	Neutral	0.0384696	Neutral	3	Benign	1	0	Non-neutral	3	Deleterious	0.76
10	133955499	G	A	27.8	0.39	0.90639	0.717052	0.999048	3	Neutral	0.00119151	Neutral	2	Benign	0.93	0.33	Neutral	0	Neutral	0.63
11	74559419	A	G	10.59	0.354617	0.03941	0.696353	0.753637	1	Deleterious	0.151764	Neutral	1	Benign	0.984	0.01	Neutral	1	Neutral	0.63
15	44158466	C	T	12.13	0.56	0.8226	0.724815	0.980661	3	Deleterious	0.464144	Neutral	5	Benign	0.592	0	Neutral	1	Neutral	0.63
1	156021546	C	T	22.5	0.48	0.8765	0.635938	0.99939	3	Neutral	0.0464458	Disease	7	Benign	0.994	0	Non-neutral	3	Deleterious	0.72
5	35910613	C	T	24.2	0.39	0.9697	0.547309	0.998578	3	Deleterious	0.370253	Neutral	5	Benign	0.118	0.04	Neutral	2	Neutral	0.74
1	151787890	C	T	34	0.66	0.99129	0.602189	0.998865	3	Deleterious	0.389911	Disease	2	Benign	1	0	Neutral	4	Deleterious	0.61
12	69968623	C	T	31	0.56	0.99189	0.702456	0.998814	3	Neutral	0.0128307	Neutral	6	Benign	0.998	0	Non-neutral	2	Deleterious	0.72
10	96741065	C	T	23.1	0.32	0.84226	0.547309	0.994142	1	Deleterious	0.350804	Disease	3	Benign	1	0.02	Non-neutral	1	Deleterious	0.72
18	12326001	G	A	22.4	0.71	0.95556	0.697927	0.995755	2	Deleterious	0.136967	Disease	8	Benign	0.422	0	Non-neutral	1	Deleterious	0.51
3	37574822	C	T	25.4	0.13	0.97736	0.653264	0.997676	3	Deleterious	0.464445	Neutral	8	Possibly damaging	0.964	0.13	Neutral	5	Neutral	0.65
8	97345750	C	T	20.8	0.47	0.79824	0.779548	0.999261	2	Neutral	0.0831692	Neutral	4	Benign	1	0.02	Non-neutral	1	Deleterious	0.72
10	96602605	G	A	22.5	0.25	0.55923	0.573888	0.993188	2	Deleterious	0.507221	Neutral	2	Possibly damaging	0.976	0.21	Neutral	6	Neutral	0.63
3	37512575	G	A	29.1	0.24	0.97013	0.408882	0.999505	3	Deleterious	0.405508	Neutral	3	Possibly damaging	0.91	0.03	Neutral	5	Neutral	0.6
19	7831634	G	A	0.002	0.190471	0.00221	0.59043	0.655982	2	Deleterious	0.952031	Neutral	6	Benign	0.954	0.91	Neutral	7	Neutral	0.74
18	22804566	C	A	22.7	0.4	0.89967	0.719019	0.959497	3	Neutral	0.089562	Disease	2	Benign	0.232	0.18	Non-neutral	2	Deleterious	0.55
16	67197688	G	A	16.01	0.64	0.96256	0.606814	0.998328	4	Deleterious	0.322509	Neutral	2	Possibly damaging	1	0.07	Non-neutral	1	Deleterious	0.51
10	76994714	G	A	22.4	0.48	0.72025	0.768056	0.998658	4	Deleterious	0.232609	Neutral	3	Benign	0.434	0.01	Neutral	4	Neutral	0.74
8	87125949	C	T	16.17	0.23	0.93963	0.573888	0.997677	2	Deleterious	0.138031	Disease	4	Benign	0.96	0.03	Neutral	3	Neutral	0.6
10	71008298	C	T	34	0.2	0.98137	0.602189	0.999295	2	Deleterious	0.734582	Disease	5	Benign	1	0	Non-neutral	4	Deleterious	0.72
21	33684248	G	A	0.804	0.33	0.02389	0	0.675038	1	Deleterious	0.937502	Neutral	9	Benign	0.996	0.48	Neutral	1	Neutral	0.74
5	61733170	A	T	19.09	0.52	0.93375	0.709663	0.940625	3	Deleterious	0.879361	Neutral	8	Benign	0.98	0.75	Neutral	7	Neutral	0.74
5	179440072	C	T	22.4	0.55	0.96278	0.709663	0.999134	4	Deleterious	0.985863	Neutral	5	Benign	0.224	0.43	Neutral	0	Neutral	0.83
12	51467725	G	A	34	0.44	0.98885	0.724815	0.999274	3	Neutral	0.0353775	Disease	6	Benign	0.996	0	Non-neutral	2	Deleterious	0.72
12	117703242	C	T	25.4	0.32	0.9753	0.618467	0.998918	3	Deleterious	0.69584	Disease	2	Possibly damaging	0.564	0.37	Neutral	6	Neutral	0.6
4	73013023	C	T	1.208	0.43	0.05608	0.547309	0.93981	2	Deleterious	0.276127	Neutral	4	Benign	0.846	0.26	Neutral	4	Neutral	0.74
1	174417941	G	A	19.83	0.52	0.94374	0.547309	0.999255	3	Deleterious	0.609534	Neutral	1	Benign	0.996	0.01	Neutral	0	Deleterious	0.51
4	111398043	G	A	0.033	0.22	0.00504	0.547309	0.884615	2	Deleterious	0.945488	Neutral	7	Benign	0.922	0.57	Neutral	6	Neutral	0.74
10	115973242	G	A	0.288	0.287052	0.12923	0.547309	0.297838	3	Deleterious	0.238834	Neutral	9	Benign	0.998	0.64	Neutral	5	Neutral	0.74
15	57731549	C	T	5.4	0.31	0.14206	0.732433	0.951707	2	Deleterious	0.98848	Neutral	7	Benign	0.996	0.26	Neutral	0	Neutral	0.75
15	69320594	G	A	14.1	0.59	0.9509	0.547309	0.998942	2	Deleterious	0.451421	Disease	0	Benign	1	0	Neutral	3	Deleterious	0.61
6	160969683	G	A	0.014	0.24	0.01301	0.573888	0.761975	1	Deleterious	0.189376	Neutral	8	Benign	0.998	0.12	Neutral	3	Neutral	0.75
6	136599532	C	T	24.5	0.56	0.89711	0.702456	0.998467	3	Neutral	0.0510875	Neutral	7	Possibly damaging	0.988	0.31	Neutral	2	Neutral	0.6
17	8296497	G	A	18.51	0.16	0.77261	0.578056	0.798021	2	Deleterious	0.989473	Neutral	9	Benign	0.408	1	Neutral	6	Neutral	0.83
14	20344485	C	T	25.8	0.59	0.1086	0.573888	0.997793	2	Deleterious	0.60634	Neutral	4	Possibly damaging	0.496	0.2	Neutral	2	Neutral	0.75
6	149783045	C	A	32	0.34	0.95467	0.547309	0.99465	2	Neutral	0.0248789	Disease	8	Benign	0.994	0	Neutral	0	Deleterious	0.76
11	102662226	C	T	15.49	0.29	0.75574	0.060301	0.993143	3	Neutral	0.0222104	Disease	8	Benign	0.988	0.03	Non-neutral	4	Deleterious	0.87
1	248685597	C	T	24.9	0.29	0.96666	0.573888	0.997369	2	Neutral	2.44894e-05	Disease	1	Possibly damaging	0.544	0	Non-neutral	3	Deleterious	0.87
2	99907780	C	T	11.23	0.47	0.11812	0.653264	0.997382	2	Neutral	0.000947669	Neutral	4	Benign	1	0	Neutral	0	Deleterious	0.61
20	37150140	C	T	22	0.61	0.99647	0.743671	0.998633	4	Neutral	0.00804053	Neutral	7	Benign	0.988	0.01	Neutral	0	Neutral	0.6
11	12234929	A	T	13.68	0.21	0.59415	0.618467	0.99735	2	Deleterious	0.427691	Disease	5	Benign	0.128	0.04	Neutral	1	Neutral	0.63
1	248685759	G	A	23.3	0.22	0.00177	0.573888	0.995922	1	Deleterious	0.299758	Disease	1	Possibly damaging	0.48	0.01	Neutral	2	Neutral	0.6
2	220083350	G	T	22.2	0.37	0.86926	0.52208	0.948459	3	Neutral	0.0424109	Neutral	7	Benign	0.972	0.45	Neutral	1	Neutral	0.65
13	58207392	G	A	20.4	0.56	0.96597	0.503968	0.998341	3	Deleterious	0.196781	Neutral	1	Benign	1	0	Non-neutral	2	Deleterious	0.61
2	210880950	A	G	8.75	0.29	0.21783	0.463624	0.950594	2	Neutral	2.1331e-06	Neutral	5	Possibly damaging	0.482	0	Neutral	0	Deleterious	0.51
1	156639679	G	T	9.174	0.19	0.19389	0.696144	0.99494	3	Neutral	0.0699019	Neutral	6	Benign	0.514	0	Non-neutral	0	Deleterious	0.52
11	124824660	G	A	18.81	0.3	0.10367	0.731467	0.999037	2	Deleterious	0.896381	Neutral	6	Benign	0.222	0.02	Neutral	0	Neutral	0.74
12	50039628	A	T	2.179	0.56	0.06553	0.702456	0.681494	2	Deleterious	0.117843	Neutral	8	Possibly damaging	0.792	0.72	Neutral	4	Neutral	0.68
14	60072187	G	T	24.7	0.37	0.9631	0.653264	0.951544	3	Deleterious	0.829151	Neutral	7	Benign	0.962	0.05	Neutral	6	Neutral	0.68
12	122977299	T	C	20.5	0.72	0.64829	0.65145	0.811444	3	Deleterious	0.653646	Neutral	8	Benign	0.978	0.6	Neutral	7	Neutral	0.74
11	95826581	C	A	23.8	0.41	0.96656	0.602189	0.947997	3	Neutral	3.545e-06	Neutral	6	Benign	0.996	0	Non-neutral	2	Deleterious	0.72
15	41870343	C	T	35	0.53	0.98847	0.643519	0.999272	4	Deleterious	0.156859	Disease	3	Benign	0.998	0	Non-neutral	3	Deleterious	0.76
3	33866819	A	T	21.4	0.38	0.84561	0.743671	0.997992	3	Deleterious	0.218375	Neutral	7	Benign	0.452	0.36	Neutral	5	Neutral	0.83
6	39285602	G	A	15.54	0.41	0.09764	0.578056	0.995804	3	Deleterious	0.358748	Disease	2	Benign	0.996	0.33	Neutral	8	Neutral	0.65
12	48880471	G	A	16.53	0.35	0.41778	0.573888	0.997777	1	Deleterious	0.215806	Neutral	4	Benign	0.814	0.05	Non-neutral	2	Neutral	0.6
12	101703550	C	T	34	0.42	0.93913	0.743671	0.999394	4	Deleterious	0.106328	Neutral	0	Benign	1	0	Non-neutral	4	Deleterious	0.61
7	94228250	T	G	24.5	0.51	0.97793	0.709663	0.994242	3	Deleterious	0.717785	Neutral	4	Benign	0.712	0.1	Non-neutral	3	Neutral	0.63
3	125879750	C	T	16.87	0.49	0.05071	0.717052	0.988383	2	Neutral	0.0497115	Neutral	6	Benign	0.506	0.03	Neutral	1	Neutral	0.61
7	112102419	A	G	17.21	0.36	0.96279	0.702456	0.998001	4	Neutral	0.0746752	Disease	7	Benign	1	0	Non-neutral	2	Deleterious	0.87
8	131073267	G	A	22.6	0.69	0.96763	0.709663	0.97225	3	Neutral	0.017016	Neutral	5	Possibly damaging	0.11	0.06	Neutral	2	Neutral	0.63
11	111908162	T	C	16.42	0.45	0.0094	0.724815	0.632029	2	Deleterious	0.886009	Neutral	5	Benign	1	1	Neutral	6	Neutral	0.75
15	41862269	G	T	24.7	0.67	0.95135	0.698795	0.996596	4	Deleterious	0.798731	Neutral	1	Possibly damaging	0.894	0.07	Neutral	5	Neutral	0.63
16	68260342	T	C	15.73	0.53	0.79109	0.643519	0.998168	4	Deleterious	0.800612	Neutral	6	Possibly damaging	0.876	0	Non-neutral	2	Deleterious	0.55
1	53544534	G	A	17.82	0.109238	0.83547	0.547309	0.999088	2	Deleterious	0.951701	Disease	0	Benign	0.846	0.13	Neutral	7	Neutral	0.68
11	17388754	T	G	24.8	0.51	0.40247	0.618467	0.986578	2	Deleterious	0.102136	Disease	1	Possibly damaging	0.978	0.01	Non-neutral	2	Deleterious	0.72
19	9213795	T	C	22.9	0.22	0.98665	0.547309	0.997485	2	Neutral	0.000174891	Disease	0	Benign	0.938	0.01	Non-neutral	2	Deleterious	0.87
7	142572875	C	T	21	0.32	0.96703	0.602189	0.999314	3	Deleterious	0.122595	Disease	7	Possibly damaging	0.988	0	Non-neutral	1	Deleterious	0.72
2	37429970	A	C	14.88	0.6	0.96525	0.702456	0.998704	4	Deleterious	0.835642	Neutral	6	Possibly damaging	0.994	0.32	Neutral	0	Neutral	0.63
17	56565428	C	T	11.63	0.47	0.08394	0	0.962718	2	Deleterious	0.999845	Neutral	8	Benign	0.782	1	Non-neutral	3	Neutral	0.65
10	99664517	C	T	25.6	0.44	0.92946	0.675528	0.999117	3	Deleterious	0.564835	Neutral	6	Benign	0.998	0.31	Non-neutral	3	Neutral	0.6
5	149502729	C	T	34	0.57	0.99323	0.658983	0.999279	4	Neutral	2.20015e-05	Disease	8	Benign	1	0	Non-neutral	3	Deleterious	0.87
6	99999718	G	A	24.4	0.73	0.99356	0.743671	0.99377	3	Deleterious	0.227904	Neutral	4	Benign	0.18	0.24	Neutral	3	Neutral	0.83
7	137206681	G	A	35	0.33	0.86752	0.573888	0.999335	3	Neutral	0.00159445	Neutral	3	Benign	0.998	0.01	Non-neutral	2	Deleterious	0.76
2	216986888	G	A	22.1	0.66	0.54751	0.702456	0.990823	3	Deleterious	0.694668	Neutral	6	Benign	0.818	0.19	Neutral	0	Neutral	0.74
5	159437648	A	G	6.535	0.34	0.07907	0.698795	0.559009	2	Deleterious	0.173548	Neutral	9	Benign	0.992	0.51	Neutral	6	Neutral	0.74
2	10807394	C	A	32	0.45	0.99436	0.743671	0.993373	4	Deleterious	0.184593	Disease	1	Benign	0.696	0.03	Neutral	1	Neutral	0.6
1	23191577	G	A	22.3	0.71	0.98763	0.732669	0.99891	4	Deleterious	0.960153	Disease	1	Benign	0.898	0.12	Neutral	4	Neutral	0.65
21	31691743	C	T	11.55	0.15	0.18808	0.573888	0.861316	1	Deleterious	0.678225	Neutral	2	Benign	0.73	0.33	Neutral	2	Neutral	0.74
1	118483783	C	T	34	0.49	0.92037	0.724815	0.99927	4	Deleterious	0.110357	Disease	5	Benign	1	0	Non-neutral	3	Deleterious	0.76
9	35957189	C	T	27.2	0.13	0.98138	0.563428	0.998516	2	Neutral	0.00648879	Disease	1	Possibly damaging	0.54	0.01	Non-neutral	0	Deleterious	0.87
20	42876107	G	A	19.78	0.55	0.91493	0.594344	0.998393	2	Deleterious	0.161763	Neutral	4	Benign	0.142	0.74	Non-neutral	0	Neutral	0.74
20	13279607	G	A	21.9	0.4	0.96451	0.616094	0.999289	2	Neutral	0.00216484	Neutral	3	Benign	1	0.01	Neutral	1	Deleterious	0.61
11	5799050	C	T	15.68	0.17	0.26131	0.573888	0.993692	2	Deleterious	0.80558	Neutral	2	Benign	0.322	0.02	Non-neutral	2	Neutral	0.63
5	138657666	G	A	26.9	0.34	0.99277	0.702456	0.997733	4	Deleterious	0.153467	Disease	2	Benign	0.988	0	Non-neutral	4	Deleterious	0.61
9	32631806	C	T	15.38	0.39	0.66635	0.658983	0.998387	1	Deleterious	0.209083	Neutral	3	Benign	0.28	0.03	Neutral	3	Neutral	0.74
4	88414877	C	G	24.1	0.47	0.26252	0.602189	0.992926	3	Neutral	0.00138101	Neutral	5	Benign	0.996	0.01	Non-neutral	1	Deleterious	0.72
6	118953699	C	T	17.36	0.507168	0.70089	0.658983	0.96764	2	Deleterious	0.841992	Neutral	5	Benign	0.61	0.41	Neutral	3	Neutral	0.74
15	66727424	G	A	23.7	0.37	0.94777	0	0.999129	4	Deleterious	0.971341	Neutral	8	Possibly damaging	0.128	0.02	Neutral	2	Neutral	0.65
2	46609121	C	T	13.48	0.3	0.23362	0.547309	0.340096	3	Deleterious	0.191718	Neutral	8	Benign	1	0.43	Neutral	4	Neutral	0.75
9	77423026	A	T	21.9	0.53	0.99331	0.618467	0.994777	3	Deleterious	0.149717	Disease	8	Benign	0.998	0	Neutral	0	Deleterious	0.61
1	248436972	A	G	1	0.18	0.00138	0.573888	0.68569	1	Neutral	0.00137351	Neutral	6	Benign	1	0.28	Neutral	0	Neutral	0.63
8	72964965	G	C	9.046	0.32	0.2538	0.618467	0.981488	1	Deleterious	0.96029	Neutral	3	Benign	0.112	0.03	Neutral	2	Neutral	0.74
14	21623250	C	T	22.6	0.139389	0.14538	0.573888	0.973249	1	Deleterious	0.515099	Neutral	4	Benign	0.966	0.11	Neutral	0	Neutral	0.74
22	18905964	C	T	21.6	0.11	0.80218	0.702456	0.998494	1	Neutral	0.632826	Neutral	6	Benign	0.992	0	Neutral	4	Neutral	0.63
11	65638742	C	T	22.4	0.56	0.9439	0.723109	0.999181	4	Deleterious	0.42319	Neutral	4	Benign	0.792	0.16	Neutral	6	Neutral	0.74
5	57751901	G	A	20.6	0.44	0.94824	0.702456	0.999169	3	Deleterious	0.150622	Neutral	2	Benign	0.994	0.02	Neutral	6	Neutral	0.6
8	24254953	C	T	14.33	0.52	0.65687	0.573888	0.694027	2	Deleterious	0.489349	Neutral	7	Benign	0.982	0.43	Neutral	6	Neutral	0.74
18	34854338	C	T	22.4	0.23	0.97582	0.603688	0.998319	3	Neutral	3.47433e-06	Neutral	1	Benign	0.99	0.01	Non-neutral	4	Deleterious	0.79
22	36681790	G	A	35	0.54	0.966	0.702456	0.999395	4	Deleterious	0.300558	Disease	3	Benign	1	0	Neutral	0	Deleterious	0.61
1	174417320	G	A	15.5	0.46	0.26487	0.491513	0.809219	2	Deleterious	0.718897	Neutral	5	Benign	1	0.79	Neutral	5	Neutral	0.75
2	207170939	C	T	17.3	0.35	0.01998	0.65145	0.984241	1	Deleterious	0.324063	Neutral	6	Benign	0.96	0.22	Neutral	5	Neutral	0.74
1	78601341	G	A	17.88	0.43	0.94704	0.618467	0.963387	2	Deleterious	0.551398	Neutral	3	Benign	0.618	0.17	Neutral	5	Neutral	0.74
2	165551415	C	T	11.15	0.45	0.04893	0.602189	0.942238	3	Deleterious	0.459769	Neutral	8	Benign	0.354	0.1	Neutral	0	Neutral	0.83
1	54331937	C	T	24.8	0.37	0.86557	0.724815	0.997644	3	Deleterious	0.688837	Neutral	2	Possibly damaging	0.998	0.11	Non-neutral	0	Neutral	0.6
14	52520368	C	T	0.013	0.3	0.01732	0.709663	0.189811	2	Neutral	0.0975385	Neutral	4	Benign	0.998	0.69	Neutral	2	Neutral	0.65
5	158749482	C	A	17.79	0.32	0.57725	0.573888	0.988914	2	Deleterious	0.689985	Neutral	5	Benign	0.7	0.14	Neutral	0	Neutral	0.74
1	20828674	G	A	24.7	0.52	0.94492	0.724815	0.996735	2	Deleterious	0.217583	Neutral	2	Benign	0.996	0.01	Non-neutral	1	Neutral	0.6
6	29054925	G	A	13.86	0.22	0.00304	0.573888	0.99045	1	Deleterious	0.710447	Neutral	2	Possibly damaging	0.998	0.29	Neutral	6	Neutral	0.63
1	156756521	C	T	23.1	0.73	0.87924	0.724815	0.994878	4	Deleterious	0.232805	Neutral	8	Possibly damaging	0.302	0	Neutral	2	Neutral	0.63
1	158517139	C	T	25.6	0.23	0.29579	0.573888	0.998539	3	Neutral	0.0204147	Neutral	9	Benign	0.996	0.67	Non-neutral	1	Neutral	0.6
10	97987202	G	A	22.5	0.36	0.78236	0.602189	0.992564	4	Deleterious	0.236969	Neutral	2	Benign	0.962	0.22	Neutral	0	Neutral	0.75
11	109294862	C	T	17.75	0.46	0.16524	0.673471	0.920528	2	Neutral	0.0357411	Neutral	8	Benign	0.972	0.18	Neutral	3	Neutral	0.65
16	16244529	C	T	13.7	0.44	0.89479	0.564498	0.998821	2	Neutral	0.000522391	Disease	1	Benign	0.936	0	Non-neutral	1	Deleterious	0.72
18	48604776	T	C	28.7	0.52	0.9939	0.724815	0.998517	3	Deleterious	1.85164e-05	Disease	9	Benign	1	0	Non-neutral	4	Deleterious	0.87
1	6705875	T	G	22	0.48	0.91944	0.702456	0.987721	3	Neutral	0.0132734	Neutral	5	Possibly damaging	0.542	0.29	Neutral	2	Neutral	0.6
2	176947040	G	A	19.8	0.21	0.98076	0.606814	0.999061	4	Neutral	0.00814566	Disease	7	Benign	1	0	Non-neutral	3	Deleterious	0.87
6	158873237	G	A	19.99	0.35	0.98433	0.608884	0.999172	3	Deleterious	0.806495	Neutral	5	Benign	1	0.57	Non-neutral	0	Neutral	0.63
1	170961348	G	A	8.233	0.18	0.02849	0.573888	0.972787	1	Deleterious	0.236996	Neutral	7	Benign	0.654	0.07	Neutral	5	Neutral	0.74
7	106710728	C	G	23.4	0.55	0.78764	0.709663	0.986145	4	Deleterious	0.484119	Disease	2	Possibly damaging	0.876	0.01	Neutral	1	Deleterious	0.55
3	24185153	C	T	24.7	0.27	0.98478	0.653264	0.998822	4	Deleterious	0.992697	Disease	5	Benign	0.618	0.16	Neutral	3	Neutral	0.65
9	130286112	C	G	9.724	0.18	0.41945	0.635938	0.990771	2	Deleterious	0.98625	Neutral	3	Benign	0.966	0.05	Neutral	0	Neutral	0.65
1	93620369	C	T	34	0.5	0.99658	0.702456	0.99937	3	Deleterious	0.478703	Disease	5	Possibly damaging	0.994	0	Non-neutral	0	Deleterious	0.72
9	134021542	C	T	15.48	0.37	0.93909	0.724815	0.998623	4	Deleterious	0.249972	Neutral	6	Possibly damaging	0.888	0	Neutral	1	Neutral	0.6
3	39307166	C	G	25.2	0.2	0.98063	0.547309	0.998282	2	Deleterious	0.971654	Neutral	8	Benign	0.502	0.02	Neutral	2	Neutral	0.71
17	72350412	G	A	16.78	0.4	0.06521	0.674405	0.995358	2	Deleterious	0.969172	Neutral	7	Benign	0.964	0.09	Neutral	3	Neutral	0.74
1	23111249	G	A	27.2	0.53	0.98331	0.743671	0.999434	4	Deleterious	0.905561	Disease	8	Benign	1	0	Non-neutral	2	Deleterious	0.72
19	9213088	A	T	23.7	0.27	0.91814	0.547309	0.985531	2	Neutral	0.0477094	Disease	1	Benign	0.924	0	Non-neutral	4	Deleterious	0.87
2	15427303	G	C	25.5	0.43	0.99527	0.659464	0.997215	3	Deleterious	0.316715	Neutral	4	Benign	0.86	0.01	Neutral	0	Neutral	0.65
2	102805692	G	T	26.4	0.36	0.92726	0.59043	0.98766	3	Neutral	3.32676e-06	Disease	5	Possibly damaging	0.978	0	Non-neutral	4	Deleterious	0.87
11	113563828	G	T	25.4	0.27	0.99565	0.725225	0.997279	2	Neutral	8.33616e-05	Disease	8	Benign	1	0	Non-neutral	3	Deleterious	0.87
19	52537724	C	A	14.71	0.42	0.05058	0.608884	0.989603	3	Neutral	0.00128804	Disease	2	Benign	1	0	Non-neutral	5	Deleterious	0.87
5	140167118	C	T	24.8	0.25	0.67559	0.578056	0.99869	2	Neutral	0.004741	Neutral	1	Benign	1	0	Non-neutral	4	Deleterious	0.79
20	33050025	C	A	21.6	0.64	0.9187	0.743671	0.993953	3	Deleterious	0.210838	Neutral	5	Benign	0.196	0.39	Neutral	4	Neutral	0.83
2	64069327	G	C	16.98	0.5	0.37441	0.685571	0.778237	4	Deleterious	0.467131	Neutral	9	Benign	0.996	0.56	Neutral	5	Neutral	0.74
7	99669833	G	A	22.7	0.29	0.00361	0.702456	0.87254	3	Deleterious	0.830064	Disease	2	Benign	1	0.07	Neutral	5	Neutral	0.63
19	43680079	C	T	23	0.22	0.01869	0.573888	0.99739	1	Deleterious	0.229635	Disease	8	Benign	0.17	0	Neutral	2	Neutral	0.61
1	196927075	C	T	23.7	0.29	0.11288	0.573888	0.996963	3	Neutral	0.0668957	Disease	1	Benign	0.324	0	Neutral	0	Deleterious	0.51
1	40129095	C	T	29.7	0.47	0.98148	0.59043	0.998972	3	Deleterious	0.10433	Disease	3	Benign	1	0.04	Non-neutral	0	Deleterious	0.55
8	15605946	C	T	35	0.43	0.90389	0.659464	0.999345	3	Neutral	0.00698942	Disease	7	Benign	1	0	Non-neutral	4	Deleterious	0.87
2	102490663	C	T	35	0.390732	0.985	0.724815	0.99937	2	Neutral	0.0272836	Disease	8	Benign	1	0	Non-neutral	2	Deleterious	0.87
11	20648387	C	T	23.5	0.31	0.82938	0.491513	0.975987	2	Deleterious	0.714016	Neutral	1	Benign	0.368	0.12	Neutral	5	Neutral	0.83
19	47969099	C	T	33	0.34	0.95745	0.723109	0.999278	3	Neutral	0.0867628	Disease	8	Benign	1	0	Non-neutral	2	Deleterious	0.87
11	124253181	T	C	0.001	0.26	0.00856	0.547309	0.193774	1	Deleterious	0.517077	Neutral	7	Benign	1	0.28	Neutral	5	Neutral	0.75
8	22037901	G	C	32	0.31	0.99436	0.709663	0.996468	3	Deleterious	0.67061	Neutral	3	Possibly damaging	0.52	0	Non-neutral	1	Deleterious	0.55
10	105363177	G	A	28	0.46	0.80469	0.645312	0.998969	2	Deleterious	0.251339	Neutral	4	Benign	1	0	Non-neutral	1	Deleterious	0.61
18	8718506	C	T	22.2	0.59	0.81889	0.662677	0.999221	2	Neutral	0.000336575	Disease	6	Benign	1	0	Non-neutral	1	Deleterious	0.87
1	169565198	G	A	18.07	0.37	0.99902	0.762322	0.988267	2	Deleterious	0.398771	Disease	2	Possibly damaging	0.636	0.1	Neutral	0	Neutral	0.6
11	57313729	T	G	26.5	0.22	0.33454	0.602189	0.965493	2	Deleterious	0.121505	Disease	0	Benign	0.994	0	Neutral	0	Deleterious	0.61
5	131014771	G	A	22.3	0.66	0.99149	0.65145	0.999324	4	Neutral	0.00722126	Disease	7	Benign	0.944	0	Non-neutral	1	Deleterious	0.72
8	134025976	C	T	29.7	0.28	0.57686	0.547309	0.999211	2	Deleterious	0.711262	Neutral	3	Benign	0.998	0	Non-neutral	3	Deleterious	0.61
2	77746526	G	A	35	0.55	0.97582	0.527494	0.999007	2	Deleterious	0.135225	Neutral	2	Possibly damaging	0.828	0	Non-neutral	0	Deleterious	0.61
6	35928780	G	A	27.7	0.33	0.22432	0.547309	0.998862	2	Neutral	0.0236819	Disease	7	Benign	1	0	Non-neutral	3	Deleterious	0.87
5	139941701	C	G	21.8	0.7	0.98805	0.709663	0.998321	2	Neutral	2.53396e-07	Disease	7	Benign	1	0	Non-neutral	2	Deleterious	0.87
5	133536100	G	C	21.8	0.59	0.99518	0.702456	0.989895	3	Deleterious	0.206863	Neutral	5	Benign	1	0.04	Neutral	6	Neutral	0.63
7	117022154	A	T	27.5	0.35	0.96906	0.573888	0.984266	3	Neutral	1.62771e-05	Disease	3	Benign	0.996	0	Non-neutral	4	Deleterious	0.87
4	88401653	T	A	32	0.41	0.95275	0.602189	0.992933	3	Neutral	0.0323442	Neutral	1	Possibly damaging	0.998	0	Non-neutral	1	Deleterious	0.76
3	167023529	C	T	4.967	0.36	0.00657	0.618467	0.836879	1	Deleterious	0.859414	Neutral	9	Benign	0.996	0.1	Neutral	3	Neutral	0.75
2	214182000	T	G	24.3	0.4	0.80455	0.659464	0.995986	2	Deleterious	0.187026	Disease	5	Benign	0.998	0.01	Neutral	4	Deleterious	0.61
9	88642755	C	T	31	0.49	0.88581	0.643519	0.999206	3	Neutral	0.0209615	Neutral	1	Possibly damaging	0.72	0.03	Neutral	0	Deleterious	0.61
1	151553518	G	T	22.8	0.43	0.96887	0.125526	0.987247	2	Deleterious	0.476388	Neutral	6	Benign	0.938	0.16	Neutral	1	Neutral	0.63
17	45297383	G	A	22.3	0.24251	0.96321	0.577349	0.999284	3	Neutral	0.0501218	Disease	6	Possibly damaging	0.966	0.63	Non-neutral	1	Deleterious	0.65
2	166852584	T	C	21.7	0.4	0.97784	0.573888	0.998244	3	Deleterious	0.424996	Disease	6	Possibly damaging	0.928	0	Non-neutral	0	Deleterious	0.72
8	92972726	C	T	35	0.5	0.99104	0.724815	0.999205	4	Neutral	0.0101641	Disease	4	Benign	1	0	Non-neutral	1	Deleterious	0.87
5	101834536	C	T	1.645	0.39	0.01521	0.596394	0.979797	2	Deleterious	0.819754	Neutral	8	Benign	0.66	0	Neutral	2	Neutral	0.63
5	109103343	C	T	31	0.61	0.98556	0.709663	0.998663	3	Deleterious	0.199298	Disease	6	Benign	1	0	Non-neutral	3	Deleterious	0.76
12	31944983	G	A	17.78	0.21	0.46158	0.643519	0.622032	1	Neutral	0.000115597	Disease	7	Possibly damaging	0.56	0	Non-neutral	1	Deleterious	0.87
14	91341557	C	A	35	0.49	0.99051	0.658983	0.995404	4	Deleterious	0.100302	Disease	9	Benign	0.992	0	Non-neutral	1	Deleterious	0.76
10	123970341	C	T	24.9	0.52	0.85024	0.743671	0.998268	2	Deleterious	0.104863	Neutral	7	Benign	1	0	Non-neutral	1	Deleterious	0.61
14	50778816	A	C	4.65	0.37	0.01335	0.52208	0.291333	1	Deleterious	0.704035	Neutral	8	Benign	1	0.59	Neutral	2	Neutral	0.75
7	129096388	C	T	34	0.44	0.93393	0.65145	0.999412	2	Deleterious	0.124944	Disease	1	Benign	1	0	Non-neutral	3	Deleterious	0.76
9	114332454	G	A	13.84	0.424508	0.83704	0.724815	0.987507	2	Deleterious	0.167603	Disease	7	Possibly damaging	0.468	0.08	Non-neutral	2	Deleterious	0.51
4	72338444	C	T	35	0.37	0.98815	0.573888	0.999246	3	Neutral	0.032053	Disease	8	Benign	1	0	Non-neutral	3	Deleterious	0.87
2	197953462	G	A	19.33	0.61	0.99526	0.547309	0.999169	2	Deleterious	0.180727	Disease	2	Benign	1	0	Non-neutral	3	Deleterious	0.76
12	120589033	C	T	22.5	0.27	0.95664	0.724815	0.998695	3	Deleterious	0.989195	Disease	4	Possibly damaging	1	0	Non-neutral	1	Deleterious	0.65
3	18436276	G	C	19.22	0.7	0.86306	0.743671	0.983881	3	Deleterious	0.779052	Neutral	8	Benign	0.822	0.08	Neutral	5	Neutral	0.65
19	42490295	C	T	24.7	0.55	0.99457	0.723109	0.995448	3	Deleterious	0.991436	Disease	2	Benign	0.48	0.11	Neutral	4	Neutral	0.74
2	166854657	C	T	21.4	0.51	0.57403	0.573888	0.240856	3	Deleterious	0.996499	Neutral	4	Benign	1	1	Neutral	6	Neutral	0.75
14	22133973	G	A	14.76	0.159468	0.17812	0.547309	0.999408	2	Deleterious	0.276455	Disease	5	Possibly damaging	0.686	0.04	Neutral	1	Deleterious	0.55
12	122217517	C	T	15.04	0.59	0.93098	0.606735	0.999246	3	Neutral	0.00484095	Disease	5	Benign	1	0	Non-neutral	1	Deleterious	0.87
10	27389197	T	C	7.978	0.23	0.00368	0.519653	0.660842	1	Deleterious	0.156897	Neutral	9	Benign	1	1	Neutral	4	Neutral	0.75
5	95018514	C	A	21.9	0.19	0.81661	0.573888	0.99881	2	Neutral	0.0298379	Neutral	5	Benign	0.998	0.01	Non-neutral	0	Deleterious	0.65
9	32631485	G	A	18.61	0.31	0.80276	0.602189	0.99726	1	Deleterious	0.414645	Neutral	4	Benign	0.77	0.01	Neutral	4	Neutral	0.65
6	117128203	C	T	25.7	0.6	0.95325	0.653264	0.999475	3	Deleterious	0.90191	Disease	1	Benign	0.776	0.04	Non-neutral	0	Deleterious	0.51
19	54668292	C	T	15.78	0.22	0.51833	0.64067	0.996556	2	Deleterious	0.793488	Neutral	8	Benign	0.566	0.18	Neutral	1	Neutral	0.74
12	122773082	C	T	26.5	0.67	0.96248	0.709663	0.995602	2	Deleterious	0.677232	Neutral	8	Benign	0.648	0.16	Neutral	4	Neutral	0.75
2	242039227	G	A	2.504	0.26	0.01788	0.702456	0.786216	2	Deleterious	0.570976	Neutral	8	Benign	0.988	0.23	Neutral	2	Neutral	0.74
1	172434497	C	T	1.338	0.17	0.0118	0.573888	0.41258	1	Deleterious	0.548591	Neutral	6	Benign	0.966	0.6	Neutral	0	Neutral	0.74
7	95041011	T	G	14.88	0.49	0.92162	0.709663	0.659957	2	Deleterious	0.60072	Neutral	8	Benign	0.984	0.16	Neutral	4	Neutral	0.74
2	31621549	C	T	23.5	0.52	0.88296	0.618467	0.99456	3	Deleterious	0.824682	Neutral	4	Benign	0.476	0	Neutral	5	Neutral	0.75
16	67650711	G	A	22.6	0.67	0.99255	0.724815	0.999247	4	Deleterious	0.972963	Neutral	5	Benign	1	0.27	Neutral	1	Neutral	0.75
1	111957693	A	G	3.295	0.23	0.00443	0.653264	0.740524	1	Deleterious	0.153175	Neutral	7	Benign	1	0.45	Neutral	4	Neutral	0.75
6	32096866	C	T	22.3	0.37381	0.59187	0.662677	0.999329	3	Deleterious	0.88557	Neutral	5	Benign	0.656	0.02	Non-neutral	0	Neutral	0.61
10	127726830	G	T	0.395	0.24	0.22534	0.574621	0.971655	2	Deleterious	0.406441	Neutral	6	Benign	0.948	0.22	Neutral	7	Neutral	0.74
19	47230774	C	T	22.4	0.62	0.92878	0.698795	0.995758	4	Neutral	0.0276284	Disease	2	Possibly damaging	0.962	0.01	Neutral	4	Deleterious	0.65
6	146719926	G	A	23	0.47	0.8383	0.602189	0.992609	4	Deleterious	0.731898	Neutral	1	Benign	0.372	0.06	Neutral	6	Neutral	0.83
8	75263599	C	T	22.5	0.31	0.75637	0.672317	0.999376	3	Neutral	0.0112347	Neutral	1	Benign	0.996	0	Neutral	2	Deleterious	0.61
4	71509557	G	A	3.059	0.3	0.00159	0.573888	0.470886	3	Deleterious	0.442823	Neutral	8	Benign	0.994	0	Neutral	3	Neutral	0.63
22	36702647	C	T	24.7	0.44	0.94059	0.702456	0.998626	4	Neutral	0.074367	Neutral	2	Benign	0.446	0.01	Neutral	7	Neutral	0.65
12	113759119	C	T	24.4	0.6	0.96796	0.709663	0.999079	2	Deleterious	0.934772	Disease	2	Benign	0.998	0.01	Non-neutral	2	Deleterious	0.65
11	20676367	G	A	29.9	0.37	0.99313	0.547309	0.998305	2	Deleterious	0.134051	Neutral	5	Benign	0.992	0.04	Non-neutral	3	Deleterious	0.61
12	81102357	G	A	17.05	0.52	0.79912	0.503968	0.993111	3	Deleterious	0.772825	Neutral	8	Benign	0.608	0	Neutral	5	Neutral	0.6
2	28627206	G	A	35	0.36	0.96718	0.658983	0.999389	4	Neutral	0.00446304	Disease	5	Benign	0.998	0	Non-neutral	1	Deleterious	0.87
17	61601559	G	A	17.43	0.182943	0.78779	0.673471	0.937525	3	Deleterious	0.357496	Disease	7	Possibly damaging	0.96	0	Non-neutral	1	Deleterious	0.72
15	41272608	G	A	24.6	0.54	0.96954	0.724815	0.995373	3	Deleterious	0.127958	Neutral	7	Benign	0.24	0.02	Non-neutral	1	Neutral	0.6
17	48603474	A	G	8.374	0.13	0.08593	0.602189	0.763488	2	Neutral	0.0949216	Neutral	9	Benign	0.93	0	Neutral	2	Neutral	0.6
10	30315425	G	A	26.4	0.58	0.97673	0.602189	0.998192	2	Deleterious	0.160584	Neutral	6	Benign	0.2	0	Neutral	2	Neutral	0.75
19	48558278	C	T	6.202	0.25	0.00034	0.709663	0.823262	1	Deleterious	0.863351	Neutral	1	Benign	0.096	0.32	Neutral	2	Neutral	0.83
19	55263828	G	A	3.186	0.2	0.00349	0.573888	0.973876	1	Deleterious	0.239032	Disease	5	Possibly damaging	0.188	0	Neutral	2	Deleterious	0.51
7	135300745	G	A	35	0.61	0.99829	0.724815	0.999371	4	Deleterious	0.639583	Neutral	4	Benign	0.984	0.01	Non-neutral	0	Deleterious	0.55
2	50280726	G	A	35	0.48	0.99133	0.653264	0.998567	4	Neutral	0.0964129	Disease	9	Benign	1	0	Non-neutral	4	Deleterious	0.87
7	87031542	T	C	20.7	0.4	0.97282	0.602189	0.994389	2	Deleterious	0.892852	Neutral	3	Benign	1	0.12	Neutral	4	Neutral	0.75
8	22412427	G	A	32	0.41	0.90507	0.731555	0.999115	4	Deleterious	0.73034	Disease	3	Benign	1	0	Neutral	1	Deleterious	0.61
14	52472502	C	T	22.7	0.56	0.99557	0.702456	0.999315	3	Deleterious	0.892094	Neutral	5	Benign	0.682	0.42	Neutral	2	Neutral	0.74
15	101447368	G	A	20.4	0.24	0.97069	0.658983	0.998936	3	Deleterious	0.121235	Disease	2	Benign	0.232	0.02	Neutral	5	Neutral	0.65
4	186380044	C	T	17.45	0.34	0.04424	0.547309	0.995697	2	Deleterious	0.514839	Neutral	1	Benign	0.984	0.24	Non-neutral	0	Neutral	0.6
2	157413986	G	T	34	0.72	0.99217	0.709663	0.997617	3	Neutral	2.1561e-05	Disease	7	Benign	1	0	Non-neutral	4	Deleterious	0.87
4	186318425	A	G	22.5	0.48	0.86474	0.504199	0.997865	3	Neutral	6.40377e-06	Neutral	5	Possibly damaging	0.868	0.03	Neutral	2	Deleterious	0.55
1	214171142	G	A	23.1	0.58	0.99278	0.573888	0.989372	3	Deleterious	0.29022	Neutral	5	Benign	0.99	0.12	Neutral	5	Neutral	0.74
12	31135536	G	A	11.89	0.13	0.45085	0.645312	0.944289	1	Deleterious	0.402583	Neutral	5	Benign	0.698	0	Neutral	0	Neutral	0.63
20	62191413	G	A	21.6	0.22	0.88572	0.723109	0.998623	2	Neutral	0.0378886	Disease	8	Benign	0.936	0	Non-neutral	1	Deleterious	0.72
1	53535477	C	T	2.86	0.26	0.00403	0.576033	0.909808	1	Deleterious	0.517155	Neutral	9	Benign	0.986	0.03	Non-neutral	3	Deleterious	0.52
18	28979385	C	T	17.52	0.29	0.5081	0.573888	0.983993	2	Deleterious	0.406741	Neutral	3	Benign	0.994	0.03	Non-neutral	0	Neutral	0.6
14	47426751	G	A	19.74	0.37	0.88394	0.618467	0.999237	2	Neutral	8.64378e-06	Disease	6	Benign	1	0	Non-neutral	0	Deleterious	0.87
19	45182153	C	G	8.117	0.24	0.00413	0.658983	0.140506	2	Neutral	0.009649	Neutral	9	Benign	1	0.15	Neutral	4	Neutral	0.63
1	171086513	C	A	0.001	0.45	0.04061	0.573888	0.422385	1	Deleterious	0.217319	Neutral	7	Benign	1	0.68	Neutral	6	Neutral	0.75
2	48037487	C	A	22.6	0.7	0.95128	0.643519	0.967669	2	Deleterious	0.859599	Neutral	1	Benign	0.862	0	Non-neutral	2	Deleterious	0.51
1	16388654	C	T	18.33	0.168713	0.1544	0.645312	0.974885	1	Deleterious	0.86736	Neutral	6	Benign	0.976	0.01	Neutral	5	Neutral	0.65
6	79711666	T	A	24	0.62	0.99338	0.724815	0.993463	2	Deleterious	0.193309	Disease	4	Benign	0.998	0	Neutral	1	Deleterious	0.61
1	79358831	C	T	29.4	0.47	0.97987	0.618467	0.999209	2	Deleterious	0.884964	Disease	3	Benign	0.64	0	Neutral	4	Neutral	0.6
1	40028018	G	C	22.4	0.61	0.9807	0.702456	0.998339	4	Neutral	0.00558133	Disease	3	Possibly damaging	0.994	0	Non-neutral	0	Deleterious	0.87
11	16007852	G	A	33	0.36	0.99024	0.59043	0.999122	3	Neutral	0.00133425	Neutral	1	Benign	0.996	0	Non-neutral	0	Deleterious	0.76
14	69795188	G	A	26.8	0.51	0.98413	0.709663	0.999408	2	Deleterious	0.704604	Neutral	0	Benign	0.704	0	Neutral	2	Neutral	0.63
10	70644505	G	A	34	0.509372	0.98868	0.658983	0.999361	2	Deleterious	0.42249	Neutral	5	Benign	1	0.01	Non-neutral	2	Deleterious	0.61
22	38155161	G	T	13.6	0.41	0.92712	0.724815	0.993944	2	Deleterious	0.368126	Disease	0	Benign	0.99	0.02	Neutral	3	Deleterious	0.55
10	43604493	C	T	27.5	0.15	0.81595	0.658983	0.999007	4	Deleterious	0.116918	Disease	1	Benign	1	0	Non-neutral	3	Deleterious	0.76
6	49409556	T	C	16.72	0.24	0.95171	0.724815	0.980234	2	Deleterious	0.560043	Neutral	8	Benign	1	0.3	Neutral	7	Neutral	0.75
20	43545430	G	A	28	0.73	0.99134	0.736553	0.998536	2	Neutral	0.0959365	Disease	4	Benign	1	0	Non-neutral	2	Deleterious	0.87
1	10197220	C	T	35	0.41	0.96677	0.724815	0.99944	3	Deleterious	0.243011	Disease	2	Benign	1	0	Neutral	1	Deleterious	0.61
14	23829010	G	A	13.78	0.29	0.89536	0.643519	0.998599	2	Deleterious	0.150924	Neutral	8	Benign	0.99	0.36	Neutral	4	Neutral	0.74
1	23689141	C	G	16.76	0.3	0.00839	0.590023	0.824155	4	Deleterious	0.99871	Neutral	6	Benign	0.998	1	Neutral	7	Neutral	0.74
22	31662023	C	T	26.1	0.55	0.94268	0.732433	0.998235	4	Deleterious	0.862217	Disease	8	Possibly damaging	0.094	0.01	Non-neutral	0	Deleterious	0.55
20	20019010	G	A	15.39	0.41	0.96794	0.698795	0.993461	2	Deleterious	0.132529	Disease	4	Benign	1	0	Non-neutral	0	Deleterious	0.72
10	126655243	G	A	34	0.63	0.99158	0.732669	0.999401	2	Deleterious	0.156141	Disease	3	Benign	1	0	Neutral	1	Deleterious	0.61
7	156469133	C	G	3.397	0.39	0.13506	0.658983	0.687042	2	Deleterious	0.921315	Neutral	8	Benign	0.988	0.3	Neutral	4	Neutral	0.74
1	74507066	A	C	8.835	0.28	0.31383	0.573888	0.989467	2	Neutral	7.52949e-05	Neutral	7	Possibly damaging	0.992	0.04	Neutral	1	Deleterious	0.55
9	114874078	G	A	25.5	0.47	0.78927	0.616094	0.998127	3	Neutral	0.046521	Neutral	7	Benign	0.126	0.01	Non-neutral	1	Neutral	0.6
22	46655628	C	T	0.003	0.21	0.00767	0.61531	0.747024	2	Neutral	0.0791908	Neutral	7	Benign	0.822	0.15	Neutral	7	Neutral	0.73
16	31392315	C	T	22.7	0.31	0.07124	0.602189	0.99699	3	Deleterious	0.365742	Neutral	2	Benign	0.078	0.4	Neutral	3	Neutral	0.83
20	60348143	G	A	0.002	0.27	0.03589	0.723109	0.908001	1	Deleterious	0.722477	Neutral	3	Benign	0.984	0.65	Neutral	7	Neutral	0.74
9	128000917	A	C	21.5	0.44	0.97603	0.698795	0.993512	4	Deleterious	0.103104	Disease	8	Benign	0.922	0	Non-neutral	3	Deleterious	0.76
5	61653537	G	A	33	0.46	0.99324	0.743671	0.996604	3	Deleterious	0.112954	Disease	1	Benign	0.998	0	Neutral	0	Deleterious	0.61
16	15122791	G	A	12.69	0.377081	0.87846	0.639134	0.99645	2	Deleterious	0.854437	Neutral	1	Benign	0.672	0.38	Non-neutral	1	Neutral	0.65
7	123270153	C	A	23.2	0.37	0.83917	0.547309	0.988307	2	Deleterious	0.904897	Neutral	7	Benign	0.914	0.01	Neutral	5	Neutral	0.68
10	7773775	A	C	21.1	0.29	0.827	0.573888	0.995343	4	Deleterious	0.137668	Neutral	5	Benign	0.932	0.29	Neutral	3	Neutral	0.74
15	77087732	T	C	26.1	0.66	0.94893	0.658983	0.998535	2	Deleterious	0.602852	Neutral	4	Benign	0.966	0.04	Non-neutral	0	Neutral	0.6
9	99285665	G	A	33	0.55	0.96337	0.743671	0.998957	3	Deleterious	0.462357	Disease	4	Benign	0.404	0.01	Non-neutral	2	Deleterious	0.61
17	65116685	C	T	35	0.38	0.98619	0.724815	0.994384	2	Deleterious	0.963031	Neutral	4	Possibly damaging	0.998	0.03	Neutral	2	Neutral	0.6
19	55888975	A	G	11.9	0.18	0.01703	0.64067	0.523926	2	Deleterious	1	Neutral	8	Benign	0.998	1	Neutral	4	Neutral	0.74
2	96690582	C	T	11.5	0.27	0.1264	0	0.546492	2	Deleterious	0.129842	Neutral	7	Possibly damaging	0.798	0.56	Neutral	1	Neutral	0.65
1	197024862	G	A	26.2	0.49	0.16211	0.573888	0.998174	2	Neutral	0.0962363	Disease	1	Possibly damaging	0.832	0.05	Non-neutral	0	Deleterious	0.72
10	32580102	T	C	24.7	0.4	0.99558	0.724815	0.991352	4	Neutral	0.0300037	Neutral	5	Possibly damaging	0.24	0.35	Neutral	3	Neutral	0.65
2	100210199	G	A	32	0.27	0.84957	0.578056	0.9993	4	Neutral	0.00258672	Neutral	2	Benign	1	0	Non-neutral	1	Deleterious	0.76
7	122787246	G	A	28	0.46	0.97212	0.573888	0.99831	3	Neutral	0.0194669	Disease	4	Benign	1	0	Non-neutral	1	Deleterious	0.87
5	68553957	C	T	32	0.47	0.97836	0.696353	0.998475	4	Neutral	0.00308983	Disease	8	Benign	1	0	Non-neutral	4	Deleterious	0.87
3	27453232	C	A	35	0.62	0.98952	0.709663	0.98781	3	Neutral	0.0265242	Disease	5	Possibly damaging	0.342	0	Neutral	0	Deleterious	0.61
15	88423632	G	A	35	0.44	0.9882	0.618467	0.999203	4	Neutral	0.0804893	Neutral	2	Benign	1	0	Non-neutral	2	Deleterious	0.76
19	41700498	G	A	15.7	0.44	0.69959	0.672317	0.999213	3	Deleterious	0.93615	Disease	2	Benign	0.998	0.14	Neutral	5	Neutral	0.63
15	69335023	C	T	17.47	0.36	0.3186	0.547309	0.999168	2	Neutral	0.0123654	Disease	4	Benign	1	0	Non-neutral	4	Deleterious	0.87
18	19088379	C	T	27.8	0.71	0.92849	0.68496	0.999054	2	Deleterious	0.139082	Neutral	3	Benign	0.994	0	Non-neutral	3	Deleterious	0.61
17	77709154	C	T	2.832	0.21	0.08771	0.547309	0.928022	2	Deleterious	0.927266	Neutral	5	Benign	0.968	0.07	Neutral	4	Neutral	0.74
6	32557489	A	T	4.964	0.47	0.0357	0.736553	0.753845	3	Deleterious	0.963725	Neutral	4	Benign	0.996	0.07	Neutral	1	Neutral	0.75
3	38768438	G	A	28.2	0.231965	0.52924	0.573078	0.999194	3	Deleterious	0.170413	Disease	8	Benign	0.994	0	Non-neutral	2	Deleterious	0.76
17	71166008	C	T	19.61	0.5	0.87727	0.696353	0.998677	3	Deleterious	0.286773	Disease	0	Benign	0.982	0.01	Non-neutral	2	Deleterious	0.72
6	39325092	T	A	7.273	0.19	0.13774	0.602189	0.824751	2	Neutral	0.000232569	Neutral	7	Possibly damaging	0.092	0.04	Neutral	1	Neutral	0.6
12	8758006	C	T	22.7	0.51	0.87678	0.578056	0.996724	2	Deleterious	0.948203	Neutral	6	Benign	0.72	0.12	Neutral	3	Neutral	0.74
4	71644115	T	A	32	0.44	0.9842	0.670488	0.988205	3	Neutral	6.25491e-06	Disease	8	Benign	0.98	0	Non-neutral	1	Deleterious	0.87
7	47440469	C	T	23.2	0.45	0.9219	0.80507	0.996495	2	Deleterious	0.946525	Neutral	6	Benign	0.156	0.01	Neutral	0	Neutral	0.74
4	113353573	C	A	24.8	0.2	0.87174	0.573888	0.99384	3	Neutral	0.0173865	Neutral	8	Benign	1	0	Non-neutral	0	Deleterious	0.65
19	19337820	G	A	10.97	0.74	0.03644	0.645312	0.916165	2	Neutral	0.0302947	Neutral	6	Benign	0.184	0.81	Neutral	0	Neutral	0.74
11	18195087	G	A	0.004	0.17	0.00702	0.573888	0.663825	1	Deleterious	0.804738	Neutral	4	Benign	0.996	0.55	Neutral	7	Neutral	0.75
1	45821040	C	G	22.4	0.4	0.98701	0.709663	0.995501	3	Deleterious	0.126252	Neutral	0	Benign	0.988	0	Non-neutral	1	Deleterious	0.61
13	20304405	C	A	35	0.61	0.96274	0.732669	0.997819	3	Deleterious	0.142584	Neutral	3	Benign	1	0.02	Non-neutral	1	Deleterious	0.61
6	26033749	C	A	16.8	0.44	0.7445	0	0.773485	2	Deleterious	0.894515	Neutral	3	Benign	0.01	0	Neutral	1	Neutral	0.75
22	37319396	C	T	23	0.36	0.05485	0.578056	0.997168	3	Neutral	0.0662988	Neutral	3	Benign	1	0.12	Non-neutral	5	Deleterious	0.61
2	102781300	C	T	10.12	0.54	0.02701	0.618467	0.55336	2	Deleterious	0.341222	Neutral	8	Benign	1	0.33	Neutral	5	Neutral	0.75
4	153244092	G	A	14.53	0.61	0.96077	0.709663	0.997464	4	Deleterious	0.408538	Disease	2	Possibly damaging	1	0	Non-neutral	1	Deleterious	0.72
11	123900411	G	A	0.001	0.19	0.00471	0.547309	0.67051	1	Deleterious	0.99926	Neutral	8	Benign	1	0.53	Neutral	7	Neutral	0.75
17	18891594	C	T	22	0.45	0.97266	0.724815	0.873229	2	Neutral	0.005693	Disease	9	Benign	0.956	0	Non-neutral	1	Deleterious	0.72
1	197021902	C	T	26	0.56	0.94931	0.573888	0.999065	2	Deleterious	0.414949	Neutral	0	Benign	0.708	0.05	Neutral	3	Neutral	0.74
1	53793511	T	C	2.51	0.29	0.05837	0	0.421313	2	Deleterious	0.732315	Neutral	7	Benign	0.982	0.02	Non-neutral	0	Neutral	0.6
11	114450990	C	A	16.57	0.38	0.28043	0.573888	0.985376	2	Deleterious	0.416174	Neutral	2	Possibly damaging	0.21	0.05	Non-neutral	0	Neutral	0.63
11	93837769	G	A	27.5	0.66	0.9896	0.573888	0.998888	2	Deleterious	0.996737	Neutral	5	Benign	0.306	0.01	Neutral	2	Neutral	0.74
12	31242358	G	A	22.5	0.36	0.95203	0.702456	0.990483	1	Neutral	0.0140676	Disease	5	Benign	1	0	Neutral	4	Deleterious	0.76
17	48267952	T	G	18.65	0.24	0.84965	0.643519	0.992165	4	Deleterious	0.961099	Neutral	2	Benign	0.83	0.04	Neutral	6	Neutral	0.68
20	62421630	C	T	18.12	0.197104	0.85941	0.743671	0.98756	3	Deleterious	0.855618	Neutral	6	Benign	0.992	0.11	Neutral	4	Neutral	0.63
11	94554698	G	A	26	0.36	0.98032	0.743671	0.997122	2	Neutral	0.0506403	Neutral	5	Benign	0.214	0.42	Neutral	4	Neutral	0.74
18	21136463	G	A	17.32	0.65	0.98527	0.724815	0.99893	3	Neutral	0.0891004	Disease	7	Possibly damaging	0.934	0.09	Neutral	4	Deleterious	0.55
11	22271870	A	T	14.87	0.22	0.08383	0.602189	0.991744	3	Deleterious	0.469388	Neutral	4	Benign	0.97	0.12	Neutral	4	Neutral	0.74
15	88690576	G	A	22.4	0.54	0.96241	0.602189	0.998716	4	Deleterious	0.820074	Neutral	4	Possibly damaging	0.038	0	Neutral	1	Neutral	0.63
4	76817474	C	T	25.5	0.32	0.83737	0.573888	0.996736	3	Neutral	0.0502187	Neutral	1	Benign	1	0	Neutral	0	Deleterious	0.61
10	72358408	G	A	24.5	0.22	0.17739	0.68496	0.998426	2	Neutral	0.0069706	Disease	1	Benign	1	0	Non-neutral	2	Deleterious	0.87
2	100058870	C	T	15.52	0.46	0.16755	0.724815	0.98146	2	Deleterious	0.250083	Neutral	8	Benign	0.978	0.11	Neutral	0	Neutral	0.74
10	101977883	C	T	22.3	0.45	0.17056	0.724815	0.96552	3	Deleterious	0.999987	Neutral	9	Benign	0.996	0.36	Neutral	5	Neutral	0.74
19	57670564	C	T	15.57	0.16	0.03146	0.514364	0.455146	2	Deleterious	0.410827	Neutral	8	Benign	0.656	0.4	Neutral	0	Neutral	0.74
19	35835827	C	A	7.98	0.32	0.01521	0.573078	0.737178	1	Deleterious	0.933584	Neutral	7	Benign	0.944	0.52	Neutral	4	Neutral	0.74
11	67069033	C	T	19.96	0.51	0.90984	0	0.99912	2	Deleterious	0.165686	Disease	3	Benign	1	0	Neutral	0	Deleterious	0.61
2	29296217	G	T	21.8	0.25	0.81015	0.573888	0.958868	2	Neutral	8.78e-07	Neutral	5	Benign	0.998	0.01	Non-neutral	4	Deleterious	0.72
3	13670413	G	A	26.1	0.12	0.9932	0.723109	0.998884	3	Neutral	0.0960422	Disease	7	Benign	0.798	0	Non-neutral	4	Deleterious	0.72
2	234749258	T	C	15.21	0.2	0.20485	0.702456	0.993957	2	Deleterious	0.29322	Neutral	8	Benign	0.996	0.1	Non-neutral	1	Neutral	0.6
6	107100203	C	T	28.2	0.59	0.98328	0.723133	0.998483	2	Neutral	0.0101169	Disease	8	Benign	0.952	0	Non-neutral	2	Deleterious	0.87
6	158923537	G	A	10.74	0.31	0.8062	0.645312	0.971143	2	Deleterious	0.174263	Neutral	6	Benign	1	0.09	Neutral	1	Neutral	0.75
11	71717144	G	A	21.9	0.47	0.87047	0.702456	0.999175	3	Neutral	7.01279e-06	Neutral	5	Benign	1	0	Non-neutral	3	Deleterious	0.76
9	36191070	C	T	21.6	0.52	0.75813	0.52208	0.980187	4	Deleterious	0.671604	Neutral	9	Benign	1	0.97	Neutral	5	Neutral	0.63
19	7689331	C	A	28.4	0.21	0.98221	0.068591	0.998181	4	Neutral	0.0758009	Disease	8	Benign	1	0	Non-neutral	0	Deleterious	0.87
1	22816965	C	G	9.879	0.58	0.27885	0.651303	0.953635	3	Deleterious	0.210028	Neutral	8	Benign	0.876	0.16	Neutral	5	Neutral	0.74
9	107521545	C	T	21.9	0.5	0.78269	0.659464	0.999194	2	Deleterious	0.150198	Disease	2	Benign	1	0	Non-neutral	1	Deleterious	0.72
1	32713189	G	A	11.55	0.32	0.05912	0.709663	0.916053	1	Deleterious	0.877085	Neutral	9	Benign	0.994	0.26	Neutral	1	Neutral	0.74
6	167436065	A	G	7.498	0.3	0.02919	0.743671	0.334481	2	Deleterious	0.334551	Neutral	9	Benign	1	0.83	Neutral	6	Neutral	0.75
3	123650166	C	A	28.7	0.42	0.83704	0.743671	0.980514	3	Neutral	4.76146e-06	Neutral	8	Benign	0.96	0	Non-neutral	1	Deleterious	0.65
7	123269120	G	A	21.3	0.45593	0.98737	0.657636	0.99843	2	Deleterious	0.399913	Neutral	5	Benign	0.822	0	Neutral	7	Neutral	0.63
19	43679591	G	A	9.323	0.19	0.00604	0.573888	0.986859	1	Neutral	0.00392664	Neutral	3	Benign	0.092	0.08	Neutral	1	Neutral	0.75
10	119805617	G	A	22.5	0.45	0.45958	0.52208	0.998923	3	Deleterious	0.119694	Neutral	4	Benign	0.766	0.01	Neutral	4	Neutral	0.65
20	47587670	C	T	20.9	0.68	0.99085	0.724815	0.999492	4	Neutral	0.0987489	Disease	7	Benign	1	0	Neutral	1	Deleterious	0.76
8	92972505	C	T	25.5	0.45	0.96768	0.724815	0.995962	4	Neutral	0.0156222	Neutral	8	Benign	0.678	0	Neutral	3	Deleterious	0.55
3	160156149	C	T	12.54	0.48	0.61511	0.702456	0.899035	3	Deleterious	0.997925	Neutral	8	Benign	0.946	0.03	Neutral	5	Neutral	0.71
18	65180960	G	A	21	0.64	0.93587	0.630245	0.999156	3	Neutral	8.19868e-05	Disease	7	Benign	1	0	Non-neutral	4	Deleterious	0.76
6	24875986	C	A	35	0.26	0.97932	0.688494	0.997021	2	Neutral	0.0350259	Neutral	1	Benign	1	0.05	Non-neutral	2	Deleterious	0.76
3	93598110	A	G	23.9	0.41	0.97359	0.618467	0.997355	3	Neutral	0.0585697	Disease	2	Benign	0.992	0	Non-neutral	2	Deleterious	0.87
15	41862464	G	A	22.4	0.66	0.8499	0.702456	0.994107	4	Deleterious	0.970985	Neutral	1	Benign	0.984	0.19	Neutral	5	Neutral	0.74
15	90286557	G	A	0.003	0.11	0.00622	0.573078	0.316173	1	Deleterious	0.171866	Neutral	8	Benign	0.9	0.04	Neutral	0	Neutral	0.68
1	66102129	G	A	18.76	0.36	0.13718	0.573888	0.978445	3	Deleterious	0.172295	Neutral	5	Possibly damaging	0.98	0.07	Neutral	0	Neutral	0.63
12	48877124	G	T	12.49	0.28	0.79922	0.573888	0.964416	2	Deleterious	0.362146	Neutral	8	Possibly damaging	0.436	0.2	Non-neutral	3	Neutral	0.63
14	88946606	C	T	25.1	0.54	0.96222	0.723109	0.999374	3	Deleterious	0.956476	Neutral	4	Benign	0.996	0.06	Non-neutral	1	Deleterious	0.51
1	87043755	G	A	21.4	0.38	0.98381	0.063197	0.999309	2	Neutral	0.0045996	Disease	3	Benign	1	0	Non-neutral	0	Deleterious	0.87
2	220028130	G	T	15.01	0.56	0.32422	0.602189	0.718008	2	Neutral	0.0289269	Disease	4	Benign	0.996	0.12	Non-neutral	3	Deleterious	0.61
4	89317276	C	T	33	0.137736	0.99337	0.659464	0.99851	2	Neutral	0.0156911	Neutral	0	Benign	0.568	0	Non-neutral	2	Deleterious	0.61
22	38539282	C	T	14.29	0.19	0.05597	0.688494	0.762984	4	Deleterious	0.736488	Neutral	0	Benign	1	0.95	Neutral	7	Neutral	0.75
3	97806870	C	T	25.3	0.27	0.93955	0.547309	0.998005	2	Neutral	4.94256e-05	Neutral	5	Possibly damaging	1	0	Non-neutral	3	Deleterious	0.76
9	125315479	G	A	20.2	0.28	0.21957	0.573888	0.988084	2	Deleterious	0.398415	Neutral	3	Benign	0.036	0.8	Neutral	0	Neutral	0.83
11	65294551	G	A	23.8	0.21	0.98073	0.732433	0.998005	2	Deleterious	0.824158	Neutral	5	Benign	0.974	0.09	Neutral	5	Neutral	0.74
16	83817018	C	T	15.19	0.29	0.85179	0.653264	0.990643	2	Deleterious	0.364705	Neutral	4	Benign	0.462	0.29	Neutral	5	Neutral	0.83
11	6007457	G	A	23.3	0.21	0.92438	0.547309	0.991132	2	Neutral	8.61427e-06	Disease	5	Benign	0.03	0	Non-neutral	5	Deleterious	0.61
3	45942962	G	A	8.038	0.49	0.03737	0.547309	0.726336	2	Deleterious	0.174115	Neutral	8	Benign	0.932	0.56	Neutral	4	Neutral	0.74
20	33028019	C	G	18.02	0.54	0.73115	0.743671	0.931289	3	Deleterious	0.497582	Neutral	8	Benign	0.984	0.49	Neutral	7	Neutral	0.74
17	6329025	C	T	34	0.35	0.96243	0.550215	0.999248	2	Neutral	0.0269153	Disease	3	Benign	1	0	Non-neutral	0	Deleterious	0.87
16	23568592	G	A	18.85	0.62	0.92845	0.52208	0.991707	3	Deleterious	0.112076	Neutral	3	Benign	0.72	0.02	Non-neutral	2	Neutral	0.6
17	71232133	C	T	8.308	0.237169	0.08685	0.724815	0.997305	2	Neutral	0.0206097	Neutral	8	Benign	0.998	0.01	Non-neutral	1	Deleterious	0.52
13	58298965	G	A	17.47	0.6	0.99202	0.607795	0.994918	3	Deleterious	0.913003	Neutral	8	Benign	0.414	0.37	Non-neutral	0	Neutral	0.74
15	60747605	T	C	20.8	0.641051	0.84603	0.743671	0.962815	3	Deleterious	0.302611	Neutral	6	Benign	0.762	0.07	Neutral	5	Neutral	0.74
14	38723952	G	A	17.78	0.54	0.82564	0.608004	0.995929	3	Neutral	0.080458	Neutral	4	Possibly damaging	0.052	0	Non-neutral	3	Deleterious	0.61
2	136614441	C	T	35	0.49	0.98594	0.723133	0.999393	4	Neutral	0.0140288	Disease	6	Possibly damaging	0.998	0.01	Neutral	0	Deleterious	0.76
1	158262436	C	G	19.33	0.42	0.11447	0.547309	0.994954	2	Deleterious	0.130426	Neutral	2	Benign	0.644	0.02	Neutral	2	Neutral	0.65
4	40337862	G	A	18.4	0.21	0.97779	0.658983	0.995526	2	Deleterious	0.184391	Disease	8	Benign	0.49	0.03	Non-neutral	0	Deleterious	0.61
17	64026031	T	A	21.7	0.31	0.91798	0.618467	0.988036	2	Neutral	0.0878369	Neutral	7	Benign	0.696	0.06	Neutral	2	Neutral	0.71
11	55419074	G	A	18.49	0.201892	0.02045	0.573888	0.967694	2	Deleterious	0.919636	Disease	5	Benign	0.948	0.13	Neutral	3	Neutral	0.63
17	72346992	G	A	25.5	0.18	0.99203	0.61531	0.998799	3	Deleterious	0.921455	Neutral	1	Benign	0.796	0.09	Neutral	4	Neutral	0.74
19	53454789	A	T	0.437	0.26	0.00051	0.608884	0.301475	1	Deleterious	0.999688	Neutral	0	Benign	0.996	1	Neutral	5	Neutral	0.75
1	157548318	C	T	11.07	0.22	0.01538	0.547309	0.737229	2	Deleterious	0.17674	Neutral	4	Benign	1	0.62	Non-neutral	0	Neutral	0.63
12	52961997	C	T	13.21	0.21	0.19924	0.547309	0.920509	1	Deleterious	0.996518	Neutral	5	Benign	1	1	Neutral	7	Neutral	0.75
19	21720795	T	C	0.001	0.29	0.00148	0.65145	0.282871	1	Neutral	0.00226809	Disease	1	Benign	0.944	0	Neutral	5	Deleterious	0.55
16	50745015	C	T	4.706	0.34	0.09504	0.602189	0.502084	3	Deleterious	0.135233	Neutral	4	Benign	0.786	0.6	Neutral	2	Neutral	0.74
19	7051376	G	A	1.521	0.42024	0.00291	0.573888	0.830172	1	Deleterious	0.996247	Neutral	4	Benign	0.27	0.46	Neutral	4	Neutral	0.83
2	105883952	G	A	22.4	0.61	0.99367	0.786243	0.998087	3	Neutral	0.00495412	Neutral	6	Benign	0.34	0.01	Non-neutral	0	Neutral	0.6
19	35843086	G	A	8.711	0.19	0.08859	0.578056	0.915056	1	Deleterious	0.774583	Disease	2	Benign	0.84	0.54	Neutral	4	Neutral	0.65
4	80328892	G	A	25.3	0.33	0.94596	0.573888	0.999306	3	Neutral	0.0812385	Neutral	1	Benign	1	0	Neutral	0	Deleterious	0.61
1	217793319	C	T	23	0.76	0.99356	0.724815	0.980178	3	Deleterious	0.157961	Neutral	7	Benign	0.424	0.08	Neutral	4	Neutral	0.83
11	55339676	G	T	0.007	0.19	0.02314	0.573888	0.719989	1	Deleterious	0.986504	Neutral	7	Benign	1	1	Neutral	7	Neutral	0.75
11	111430981	G	A	25.3	0.59	0.96551	0.658983	0.999414	3	Neutral	0.0695269	Neutral	6	Benign	1	0.06	Non-neutral	2	Deleterious	0.61
13	73491234	G	C	28.7	0.5	0.99387	0.658983	0.99834	2	Deleterious	0.49852	Neutral	3	Benign	1	0	Neutral	1	Deleterious	0.51
22	43195097	G	A	28.6	0.36	0.99322	0.709663	0.998915	2	Deleterious	0.1008	Disease	0	Benign	0.998	0	Neutral	1	Deleterious	0.61
22	26839131	G	A	19.9	0.42	0.98799	0.709663	0.999202	3	Deleterious	0.383493	Disease	8	Benign	0.998	0	Non-neutral	3	Deleterious	0.72
18	71816207	G	C	5.224	0.12	0.08779	0.685571	0.668051	1	Deleterious	0.176721	Neutral	7	Benign	0.866	0.59	Non-neutral	0	Neutral	0.68
2	170510670	C	T	19.75	0.2	0.81143	0.573888	0.997321	2	Deleterious	0.161633	Neutral	7	Benign	0.112	0	Non-neutral	1	Neutral	0.63
9	124094867	G	C	25.3	0.28	0.98672	0.709663	0.996933	3	Deleterious	0.985	Neutral	7	Benign	0.974	0.06	Neutral	7	Neutral	0.74
6	43010580	G	A	21.9	0.62	0.97388	0.723133	0.999418	2	Neutral	0.0149867	Neutral	7	Possibly damaging	0.998	0.03	Neutral	2	Deleterious	0.55
22	39884653	C	T	28.5	0.58	0.95085	0.717052	0.997775	3	Neutral	0.0360275	Disease	3	Benign	1	0	Non-neutral	3	Deleterious	0.87
2	216299442	A	C	22.2	0.24	0.96529	0.723109	0.994365	4	Deleterious	0.820035	Disease	4	Benign	0.992	0	Neutral	2	Deleterious	0.61
5	125912844	C	T	28.4	0.51	0.98153	0.702456	0.999085	3	Neutral	0.00223432	Disease	3	Benign	0.994	0	Non-neutral	0	Deleterious	0.87
14	66200031	C	T	25.7	0.29	0.85415	0.709663	0.99896	2	Neutral	0.0853374	Neutral	1	Benign	1	0.03	Neutral	0	Deleterious	0.61
4	77476762	G	T	21.4	0.36	0.821	0.67347	0.983041	2	Neutral	0.0608172	Neutral	4	Possibly damaging	0.936	0.01	Non-neutral	4	Deleterious	0.72
6	88046883	C	T	33	0.48	0.99572	0.709663	0.998751	2	Neutral	3.3442e-06	Disease	1	Benign	0.994	0	Non-neutral	3	Deleterious	0.87
1	153657486	C	T	32	0.42	0.85727	0.743671	0.998928	4	Deleterious	0.840455	Disease	2	Benign	0.954	0	Non-neutral	1	Deleterious	0.65
8	144895089	C	T	16.65	0.36	0.98335	0.702456	0.99915	2	Deleterious	0.627238	Disease	0	Possibly damaging	0.982	0	Neutral	0	Deleterious	0.61
21	30378937	C	T	28.6	0.72	0.9962	0.653264	0.999254	3	Neutral	0.0464324	Neutral	1	Benign	1	0	Non-neutral	3	Deleterious	0.79
9	35259020	C	A	17.44	0.48	0.50037	0.779548	0.955497	2	Deleterious	0.285002	Neutral	6	Possibly damaging	0.796	0.18	Non-neutral	0	Neutral	0.6
3	33645687	G	A	25.4	0.53	0.98459	0.743671	0.998172	3	Deleterious	0.309482	Neutral	6	Benign	0.616	0	Neutral	0	Deleterious	0.51
1	248112298	C	T	9.332	0.26	0.00479	0.573888	0.991163	2	Neutral	0.00101331	Neutral	6	Benign	0.472	0.01	Non-neutral	2	Neutral	0.6
10	104184436	G	A	22.4	0.52	0.98074	0.643519	0.999191	3	Neutral	3.03137e-06	Neutral	2	Benign	1	0.23	Non-neutral	1	Deleterious	0.61
1	155257024	G	A	22.3	0.54	0.98361	0.723109	0.999465	4	Deleterious	0.44633	Disease	1	Benign	1	0.05	Neutral	3	Neutral	0.63
7	106508867	C	G	23.6	0.29	0.77672	0.573888	0.979749	4	Deleterious	0.829378	Neutral	3	Benign	0.732	0.02	Non-neutral	0	Neutral	0.6
16	14024621	T	A	22.3	0.66	0.94163	0.658983	0.945673	4	Neutral	0.075814	Neutral	5	Benign	0.844	0.2	Neutral	2	Neutral	0.68
2	168098352	G	C	27.2	0.53	0.99268	0.573888	0.997623	2	Deleterious	0.964969	Neutral	7	Benign	0.72	0.88	Neutral	5	Neutral	0.75
7	63726795	C	T	9.815	0.23	0.45141	0.573888	0.983918	1	Deleterious	0.216205	Neutral	4	Benign	0.654	0.04	Non-neutral	3	Deleterious	0.61
9	137620555	G	A	22.7	0.39	0.99142	0.723109	0.987516	3	Deleterious	0.433484	Neutral	7	Benign	0.994	0.3	Neutral	4	Neutral	0.74
2	220423044	C	T	22.1	0.38	0.89975	0.643519	0.999305	2	Deleterious	0.217288	Neutral	4	Benign	0.07	0.01	Neutral	2	Neutral	0.74
13	73355005	G	A	22.7	0.52	0.97846	0.662677	0.997695	4	Deleterious	0.738347	Neutral	3	Benign	0.972	0.07	Neutral	4	Neutral	0.74
19	16976329	G	A	18.32	0.44	0.94941	0.724815	0.993602	4	Deleterious	0.952668	Neutral	9	Benign	0.974	0.48	Neutral	5	Neutral	0.74
6	108243080	G	A	33	0.6	0.97135	0.743671	0.999192	3	Neutral	0.000395733	Disease	8	Benign	0.998	0	Non-neutral	2	Deleterious	0.87
9	132630549	G	A	22.5	0.43	0.94214	0.723109	0.998262	2	Deleterious	0.964453	Neutral	8	Benign	0.462	0.55	Neutral	2	Neutral	0.83
1	158517057	G	A	26	0.28	0.80467	0.573888	0.997996	3	Neutral	0.000762366	Disease	4	Possibly damaging	1	0	Non-neutral	0	Deleterious	0.87
19	44793083	T	C	9.79	0.13	0.03321	0.602189	0.79833	2	Deleterious	0.285138	Neutral	9	Benign	0.976	0.3	Neutral	4	Neutral	0.74
1	8073398	C	T	0.002	0.45	0.02257	0.724815	0.342796	2	Deleterious	0.6167	Neutral	10	Benign	0.998	0.57	Neutral	4	Neutral	0.74
19	51380002	G	A	1.168	0.172896	0.00146	0.491513	0.718108	2	Deleterious	0.764519	Neutral	4	Benign	0.996	0.89	Neutral	3	Neutral	0.75
1	247835674	G	A	10.04	0.25	0.02898	0.573888	0.971084	1	Neutral	0.000302309	Disease	1	Benign	0.422	0	Non-neutral	2	Deleterious	0.61
2	67631024	C	T	0.016	0.33	0.05652	0.608884	0.188221	2	Deleterious	0.791581	Neutral	8	Benign	0.818	0.15	Neutral	6	Neutral	0.74
17	6531586	G	A	22.7	0.59	0.90748	0.724815	0.996474	2	Neutral	0.0159698	Neutral	5	Benign	0.994	0.03	Neutral	1	Neutral	0.6
4	6107489	C	T	19.33	0.31	0.97704	0.603688	0.999258	3	Neutral	0.000374829	Disease	0	Benign	1	0.04	Non-neutral	1	Deleterious	0.72
9	101980562	G	T	22.2	0.47	0.97636	0.702456	0.994739	2	Neutral	0.0371886	Disease	7	Possibly damaging	1	0	Non-neutral	1	Deleterious	0.87
2	220046437	G	C	22.3	0.38	0.9915	0.743671	0.99862	3	Deleterious	0.118158	Neutral	6	Benign	1	0.01	Non-neutral	1	Deleterious	0.61
12	91348083	C	T	14.57	0.38	0.27675	0.596394	0.988047	2	Deleterious	0.859305	Neutral	7	Benign	0.46	0.11	Neutral	3	Neutral	0.83
19	42260742	C	T	7.844	0.11	0.00506	0.547309	0.968494	1	Deleterious	0.237918	Disease	6	Benign	0.78	0.1	Neutral	4	Neutral	0.63
9	35825640	C	A	9.702	0.21	0.28409	0.547309	0.987691	2	Deleterious	0.272707	Neutral	9	Benign	0.712	0.03	Neutral	7	Neutral	0.73
19	6702545	C	T	29.1	0.25	0.93934	0.658983	0.999376	4	Neutral	0.00953512	Disease	8	Benign	1	0	Non-neutral	3	Deleterious	0.87
19	12883429	C	G	27.4	0.56	0.93286	0.643519	0.997237	3	Deleterious	0.692498	Disease	2	Benign	0.886	0	Neutral	4	Neutral	0.6
17	46134443	G	C	21.7	0.61	0.97889	0.698795	0.968767	4	Deleterious	0.160861	Neutral	3	Possibly damaging	0.31	0.02	Neutral	5	Neutral	0.65
5	178391860	G	A	5.204	0.29	0.01053	0.653264	0.679575	2	Neutral	0.0397225	Disease	2	Benign	0.588	0.25	Non-neutral	0	Deleterious	0.51
1	89618034	C	T	10.6	0.53	0.32579	0.573888	0.999187	2	Neutral	0.0170154	Disease	7	Benign	1	0.01	Non-neutral	3	Deleterious	0.87
1	25785241	G	A	16.98	0.54	0.84394	0.608884	0.99295	4	Deleterious	0.173711	Neutral	7	Benign	0.98	0.64	Neutral	7	Neutral	0.74
19	11892195	G	A	21.8	0.25	3e-05	0.618467	0.985154	1	Deleterious	0.837196	Neutral	2	Benign	0.766	0.7	Neutral	4	Neutral	0.74
5	75914043	C	G	15.59	0.38	0.25526	0.547309	0.998203	3	Deleterious	0.865104	Neutral	8	Benign	0.956	0.44	Neutral	5	Neutral	0.74
22	20100722	C	T	22.5	0.52	0.99541	0.643519	0.999325	4	Deleterious	0.620716	Disease	6	Benign	0.33	0	Neutral	1	Neutral	0.63
10	101563815	G	A	0.003	0.32	0.12746	0.573888	0.758657	3	Deleterious	0.59371	Neutral	6	Benign	0.988	0.29	Neutral	5	Neutral	0.74
10	51123977	C	T	24.7	0.49	0.93347	0.658983	0.9771	0	Deleterious	0.949683	Neutral	7	Benign	0.916	0.48	Neutral	2	Neutral	0.74
8	10467581	C	T	15.69	0.17	0.13265	0.578056	0.777159	1	Deleterious	0.18978	Neutral	7	Possibly damaging	0.8	0.72	Non-neutral	0	Neutral	0.6
10	121658188	C	T	15.63	0.44	0.96282	0.724815	0.9846	3	Deleterious	0.190483	Neutral	7	Benign	0.99	0.02	Neutral	0	Neutral	0.65
19	55450410	C	T	7.782	0.23	0.04905	0.576033	0.688985	2	Deleterious	0.708067	Neutral	4	Benign	0.944	0.43	Neutral	4	Neutral	0.74
11	100922293	C	T	35	0.43	0.9854	0.573888	0.999459	3	Deleterious	0.948194	Disease	7	Benign	0.296	0.01	Non-neutral	0	Neutral	0.6
1	113269288	G	C	14.08	0.49	0.80815	0.577349	0.991393	3	Deleterious	0.962504	Neutral	8	Benign	0.82	0	Neutral	0	Neutral	0.63
2	26693517	C	T	27.1	0.36	0.98605	0.547309	0.99912	3	Deleterious	0.389696	Neutral	4	Benign	0.696	0.1	Neutral	3	Neutral	0.74
12	50746740	T	G	0.002	0.25	0.002	0.547309	0.135049	1	Deleterious	0.990996	Neutral	7	Benign	0.996	1	Neutral	6	Neutral	0.74
6	7845400	G	A	22.6	0.26	0.6619	0.658983	0.98949	3	Deleterious	0.765154	Neutral	0	Benign	0.794	0.43	Neutral	5	Neutral	0.74
11	118509648	C	T	21.9	0.529518	0.94795	0.743671	0.999226	3	Deleterious	0.282316	Neutral	6	Benign	1	0	Neutral	0	Deleterious	0.51
19	50310496	A	C	17.02	0.44	0.87549	0.606735	0.99756	2	Neutral	6.73326e-07	Disease	0	Benign	1	0	Non-neutral	5	Deleterious	0.87
1	203194936	G	A	21.9	0.25	0.06776	0.573888	0.993101	1	Deleterious	0.325859	Disease	1	Benign	0.598	0.08	Non-neutral	0	Neutral	0.6
14	91773494	G	A	0.341	0.2	0.06428	0.696144	0.775186	1	Deleterious	0.219374	Neutral	8	Benign	0.998	0.3	Neutral	3	Neutral	0.75
19	9296779	C	T	1.587	0.18	0.01258	0.547309	0.500346	1	Deleterious	0.965966	Neutral	9	Possibly damaging	1	0.16	Neutral	7	Neutral	0.63
20	47292802	G	A	32	0.36	0.87731	0.709663	0.999414	3	Deleterious	0.999997	Disease	7	Benign	0.998	0	Non-neutral	2	Deleterious	0.65
6	114378711	G	A	17.89	0.48	0.99248	0.709663	0.996527	3	Neutral	0.00817418	Disease	8	Benign	0.928	0.01	Neutral	2	Deleterious	0.61
5	41149541	C	T	6.777	0.16	0.02572	0.573888	0.780624	1	Deleterious	0.595498	Neutral	7	Benign	0.986	0.51	Neutral	5	Neutral	0.74
2	238485934	G	A	16.52	0.4	0.94108	0.702456	0.972341	3	Deleterious	0.270618	Neutral	4	Benign	0.368	0.03	Neutral	5	Neutral	0.74
4	111474533	G	A	22.8	0.4	0.83628	0.618467	0.980073	3	Deleterious	0.961616	Neutral	5	Benign	0.998	0.83	Neutral	6	Neutral	0.74
10	105361883	C	T	31	0.29	0.82716	0.723109	0.999011	2	Neutral	0.0600172	Neutral	8	Benign	0.978	0.04	Neutral	2	Deleterious	0.52
9	106891967	G	C	21.7	0.45	0.96172	0.743671	0.990781	4	Deleterious	0.724041	Neutral	3	Benign	0.608	0.63	Neutral	3	Neutral	0.74
6	17600920	G	C	12.61	0.33	0.60907	0.47417	0.995152	2	Deleterious	0.901805	Neutral	7	Possibly damaging	0.062	0.4	Neutral	0	Neutral	0.74
16	86600976	C	A	22.8	0.51	0.82613	0	0.995684	4	Neutral	0.0558762	Disease	3	Possibly damaging	0.888	0.01	Neutral	3	Deleterious	0.65
15	34647881	G	A	17.01	0.37	0.89233	0.670488	0.999356	2	Neutral	0.0975903	Neutral	6	Benign	0.992	0.03	Neutral	0	Deleterious	0.55
11	57177552	G	A	28.1	0.54	0.96279	0.743671	0.999119	3	Deleterious	0.160036	Disease	1	Possibly damaging	0.98	0.01	Neutral	3	Deleterious	0.55
5	151183590	C	T	24.4	0.43	0.93933	0.643519	0.996968	4	Deleterious	0.555402	Neutral	2	Benign	0.982	0.01	Non-neutral	3	Deleterious	0.61
1	21806710	T	G	0.001	0.23	0.0001	0.547309	0.07519	1	Deleterious	0.89566	Neutral	9	Benign	1	1	Neutral	8	Neutral	0.75
1	32100987	G	A	21.6	0.59	0.93474	0.709663	0.99326	3	Deleterious	0.508643	Neutral	3	Possibly damaging	0.616	0.13	Non-neutral	0	Neutral	0.6
6	10956473	G	A	15.46	0.25	0.25136	0.667671	0.695049	1	Deleterious	0.535339	Neutral	8	Benign	0.73	0	Neutral	1	Neutral	0.63
2	198288653	A	G	23.3	0.65	0.99335	0.724815	0.999156	4	Neutral	0.000279132	Neutral	1	Benign	0.796	0.27	Neutral	1	Deleterious	0.51
1	247063765	G	A	31	0.66	0.99289	0.446627	0.99914	2	Neutral	0.019281	Neutral	5	Possibly damaging	1	0.01	Neutral	3	Deleterious	0.61
9	100286582	G	A	29.4	0.42	0.95509	0.602189	0.999138	3	Deleterious	0.196079	Disease	1	Benign	0.994	0.35	Non-neutral	1	Deleterious	0.55
2	102456340	C	T	26.1	0.59	0.97175	0.724815	0.99737	2	Deleterious	0.662103	Neutral	2	Benign	1	0	Non-neutral	0	Deleterious	0.51
1	213178593	C	T	13.37	0.38	0.86015	0.724815	0.940249	3	Deleterious	0.485223	Neutral	4	Benign	0.948	0.15	Neutral	2	Neutral	0.74
19	13004318	C	T	22.1	0.53	0.98378	0.743671	0.999277	3	Neutral	0.013872	Disease	7	Benign	0.988	0	Non-neutral	1	Deleterious	0.87
12	47471917	G	T	21.4	0.48	0.97692	0.673471	0.979853	3	Deleterious	0.230538	Neutral	3	Benign	0.226	0.01	Non-neutral	1	Neutral	0.63
1	172417620	G	C	9.359	0.39	0.84802	0.547309	0.988862	2	Deleterious	0.213125	Neutral	5	Benign	0.996	0	Non-neutral	4	Deleterious	0.61
3	31705657	G	A	35	0.134412	0.96668	0.709663	0.999211	3	Deleterious	0.163404	Neutral	3	Benign	0.998	0	Neutral	2	Deleterious	0.51
5	115249078	C	T	25	0.63	0.99744	0.709663	0.980367	3	Deleterious	0.802063	Neutral	4	Benign	0.98	0.1	Neutral	0	Neutral	0.75
19	39991276	G	A	32	0.12	0.98915	0.673471	0.999227	2	Deleterious	0.109696	Disease	9	Benign	1	0	Non-neutral	1	Deleterious	0.76
12	43860480	G	A	31	0.2	0.96658	0.653264	0.999062	2	Deleterious	0.195193	Disease	6	Benign	0.994	0.02	Non-neutral	1	Deleterious	0.72
6	132649166	G	A	28.1	0.62	0.98031	0.653264	0.99853	3	Deleterious	0.192553	Disease	2	Benign	1	0	Non-neutral	1	Deleterious	0.76
3	196134250	C	A	25.1	0.62	0.95322	0.709663	0.995941	2	Deleterious	0.161448	Neutral	8	Benign	0.946	0.02	Neutral	6	Neutral	0.68
8	94748568	G	T	19.4	0.5	0.87235	0.702456	0.875964	2	Deleterious	0.363513	Neutral	5	Benign	0.99	1	Neutral	6	Neutral	0.74
1	156594154	C	T	21.9	0.29	0.9686	0.503968	0.999081	2	Deleterious	0.203747	Neutral	1	Possibly damaging	0.796	0	Neutral	0	Deleterious	0.51
1	11187102	G	A	27.1	0.55	0.9917	0.724815	0.995716	4	Deleterious	0.38541	Neutral	3	Benign	0.552	0.04	Neutral	3	Neutral	0.68
11	10781728	C	T	35	0.59	0.96764	0.724815	0.999469	4	Neutral	0.00208994	Disease	8	Benign	1	0	Non-neutral	4	Deleterious	0.87
2	25964921	C	T	33	0.62	0.97119	0.698795	0.999013	2	Neutral	0.0789485	Neutral	4	Benign	1	0	Non-neutral	2	Deleterious	0.61
1	226252059	C	T	22.4	0.51	0.95666	0.685571	0.947466	2	Deleterious	0.173887	Disease	8	Benign	0.442	0.13	Non-neutral	0	Deleterious	0.51
9	131515657	G	A	22.2	0.47	0.97028	0.709663	0.999413	3	Neutral	0.030772	Disease	4	Benign	1	0	Non-neutral	3	Deleterious	0.87
1	89408767	G	A	26.4	0.46	0.99611	0.743671	0.99733	3	Deleterious	0.65749	Disease	4	Benign	1	0.07	Neutral	4	Neutral	0.63
8	13959988	G	A	31	0.3	0.97717	0.573888	0.998378	3	Neutral	0.0452738	Disease	5	Benign	0.998	0	Non-neutral	2	Deleterious	0.87
19	50169088	G	A	7.55	0.46	0.00021	0.52208	0.96742	2	Deleterious	0.931117	Neutral	8	Benign	1	0	Neutral	0	Neutral	0.63
11	132177693	C	T	34	0.24	0.90954	0.709663	0.999131	3	Deleterious	0.141553	Disease	3	Benign	1	0	Non-neutral	1	Deleterious	0.72
2	220032917	C	T	15.08	0.49	0.89596	0.550215	0.943329	2	Neutral	0.00611523	Neutral	8	Benign	0.988	0.62	Non-neutral	0	Neutral	0.6
17	34842805	A	C	17.17	0.41	0.8321	0.52208	0.976819	3	Neutral	0.000155191	Disease	3	Benign	1	0	Non-neutral	3	Deleterious	0.87
1	165183036	C	T	22.5	0.63	0.99123	0.573888	0.997962	3	Neutral	0.0973003	Neutral	8	Benign	0.508	0.03	Neutral	1	Neutral	0.63
4	107229997	G	A	35	0.55	0.9772	0.658983	0.999214	3	Neutral	0.000354258	Disease	6	Benign	1	0	Non-neutral	5	Deleterious	0.87
6	27833143	G	A	14.68	0.54	0.00676	0.47417	0.894533	3	Deleterious	0.765022	Disease	2	Benign	0.792	0	Non-neutral	0	Deleterious	0.65
1	248436912	T	C	8.174	0.144932	0.00573	0.573888	0.596975	1	Neutral	0.0631873	Neutral	8	Benign	1	0.26	Neutral	3	Neutral	0.63
4	70066408	C	A	11.59	0.12	0.09717	0.618467	0.868173	1	Deleterious	0.28818	Neutral	3	Possibly damaging	0.956	0.01	Neutral	3	Neutral	0.6
10	50369665	C	T	3.589	0.43	0.03665	0.607795	0.398305	1	Deleterious	0.122151	Neutral	8	Benign	1	0.15	Neutral	3	Neutral	0.75
5	75587088	G	A	22.3	0.6	0.98476	0.547309	0.999069	2	Deleterious	0.832434	Disease	1	Benign	0.736	0.06	Neutral	0	Neutral	0.65
19	40887059	C	T	20.8	0.46	0.64836	0.536957	0.999461	4	Deleterious	0.462214	Neutral	3	Benign	0.986	0.11	Neutral	0	Neutral	0.75
3	165491280	C	T	22.9	0.3	0.91322	0.618467	0.996328	3	Deleterious	0.633546	Neutral	4	Benign	0.996	0.09	Neutral	2	Neutral	0.75
12	25398255	G	T	29.2	0.53	0.99009	0.743671	0.996626	4	Deleterious	0.985779	Disease	10	Benign	1	0.8	Neutral	0	Deleterious	0.51
7	143748332	C	T	18.33	0.14	0.08615	0.573888	0.989346	2	Deleterious	0.162791	Neutral	9	Benign	0.88	0	Neutral	3	Neutral	0.63
12	18891447	G	A	14.47	0.3	0.91313	0.573888	0.9995	3	Deleterious	0.416018	Neutral	1	Possibly damaging	0.99	0.03	Non-neutral	3	Deleterious	0.61
5	154393792	G	A	22.1	0.42	0.60575	0.602189	0.973373	1	Deleterious	0.811126	Neutral	4	Benign	0.974	0.81	Neutral	5	Neutral	0.74
12	76767129	G	A	23.8	0.6	0.9932	0.743671	0.985984	3	Deleterious	0.129009	Neutral	3	Benign	0.99	0.35	Neutral	3	Neutral	0.75
2	15506795	G	C	22.4	0.41	0.63312	0.709663	0.995453	2	Deleterious	0.822945	Neutral	8	Benign	0.846	0.06	Neutral	0	Neutral	0.74
22	19966513	G	A	17.73	0.42	0.98737	0.702456	0.999249	3	Neutral	8.63607e-06	Disease	7	Possibly damaging	1	0.02	Non-neutral	1	Deleterious	0.87
16	58437158	C	T	13.08	0.35	0.58967	0.709663	0.555573	3	Deleterious	0.994498	Neutral	8	Benign	1	1	Neutral	1	Neutral	0.75
19	59010893	G	C	17.84	0.57	0.2391	0	0.973238	2	Neutral	0.0999091	Neutral	5	Benign	1	0.4	Neutral	4	Neutral	0.63
14	70490018	G	A	23.5	0.21	0.86303	0.658983	0.998577	2	Deleterious	0.537602	Neutral	5	Benign	0.076	0.21	Neutral	0	Neutral	0.83
7	44664045	C	A	17.02	0.45	0.93991	0.724815	0.940913	4	Neutral	6.16583e-06	Neutral	4	Benign	0.994	0.92	Neutral	2	Neutral	0.63
6	101248365	A	T	22.4	0.43	0.97025	0.658983	0.943876	2	Deleterious	0.961636	Neutral	1	Benign	1	0.22	Neutral	8	Neutral	0.75
8	144406777	G	A	23.4	0.36	0.96493	0.724815	0.997863	3	Neutral	0.0625383	Disease	6	Benign	0.96	0	Neutral	0	Deleterious	0.61
17	46688112	C	A	22.7	0.24	0.99372	0.606814	0.993969	4	Deleterious	0.64084	Neutral	4	Benign	0.98	0.03	Neutral	4	Neutral	0.6
2	101183001	C	T	27.3	0.52	0.93817	0.724815	0.999365	3	Neutral	0.0082179	Disease	8	Benign	1	0	Non-neutral	4	Deleterious	0.87
12	91347850	C	T	7.206	0.28	0.03796	0	0.868263	1	Neutral	0.0986341	Neutral	8	Benign	0.45	0	Neutral	4	Neutral	0.63
10	105967546	T	A	1.478	0.25	0.25074	0.602189	0.614421	2	Deleterious	0.247411	Neutral	7	Benign	0.984	0.49	Neutral	5	Neutral	0.74
5	54420717	C	T	27.7	0.35	0.46198	0.725225	0.999262	2	Neutral	0.00153988	Disease	5	Benign	1	0.07	Non-neutral	1	Deleterious	0.61
11	6867694	T	G	6.166	0.33	0.13811	0.547309	0.958317	2	Neutral	0.067671	Neutral	3	Benign	0.974	0.09	Neutral	3	Neutral	0.65
8	125015580	G	T	16.44	0.53	0.9765	0.573888	0.993941	3	Neutral	0.0579381	Disease	9	Benign	0.998	0.01	Non-neutral	2	Deleterious	0.87
7	116423414	A	G	29.1	0.54	0.96198	0.658983	0.998194	3	Neutral	0.771281	Disease	6	Benign	1	0	Non-neutral	2	Deleterious	0.72
6	169623438	G	C	21.4	0.5	0.95427	0.743671	0.998105	3	Neutral	4.51988e-06	Disease	8	Benign	1	0	Non-neutral	2	Deleterious	0.87
10	125521583	C	T	15.39	0.36	0.99017	0.630245	0.998841	3	Deleterious	0.134734	Disease	7	Possibly damaging	0.992	0	Non-neutral	3	Deleterious	0.76
15	43707863	C	A	35	0.33	0.98917	0.702456	0.987962	4	Neutral	0.0857842	Neutral	2	Benign	1	0.16	Non-neutral	2	Deleterious	0.61
10	122625160	C	T	34	0.39	0.96662	0.743671	0.999403	3	Deleterious	0.163208	Disease	1	Benign	1	0	Non-neutral	3	Deleterious	0.76
17	10431190	C	T	14.24	0.34	0.93705	0.653264	0.987533	3	Neutral	0.0108102	Neutral	3	Benign	0.948	0	Neutral	3	Deleterious	0.51
9	27556764	G	A	35	0.46	0.98345	0.724815	0.999209	2	Deleterious	0.178683	Disease	0	Benign	1	0	Non-neutral	2	Deleterious	0.76
8	141829013	C	A	25.1	0.73	0.98375	0.743671	0.987443	4	Deleterious	0.420308	Neutral	4	Benign	0.084	0.21	Neutral	4	Neutral	0.83
3	45780149	G	A	22.6	0.54	0.9969	0.688494	0.999349	4	Neutral	0.00468484	Disease	7	Benign	1	0	Non-neutral	4	Deleterious	0.87
17	39623313	C	T	9.044	0.13	0.13187	0.573888	0.998139	2	Deleterious	0.232705	Neutral	2	Benign	0.53	0.01	Non-neutral	0	Neutral	0.6
9	18775831	A	C	19.01	0.36	0.27097	0.618467	0.9904	3	Neutral	0.00575656	Neutral	1	Benign	0.242	0.06	Neutral	0	Neutral	0.75
9	135946015	T	C	25.5	0.43	0.98404	0.645312	0.998435	2	Deleterious	0.527609	Neutral	7	Benign	0.948	0	Neutral	6	Neutral	0.6
6	34826300	C	T	24.6	0.56	0.95044	0.724815	0.999027	2	Neutral	0.0140913	Disease	3	Possibly damaging	0.996	0.02	Neutral	3	Deleterious	0.72
12	110820721	C	G	22.3	0.59	0.99282	0.724815	0.993545	4	Deleterious	0.985269	Neutral	3	Benign	0.788	0.2	Neutral	1	Neutral	0.74
10	98799805	C	A	16.75	0.4	0.98121	0.576033	0.998551	3	Deleterious	0.417498	Neutral	0	Benign	1	0	Non-neutral	0	Deleterious	0.61
19	15565261	G	A	19.84	0.55	0.37487	0.596491	0.98162	2	Deleterious	0.95633	Neutral	4	Benign	0.596	0.64	Neutral	2	Neutral	0.74
8	69381007	C	T	25.8	0.51	0.94868	0.573888	0.999145	2	Deleterious	0.427359	Neutral	7	Benign	1	0.16	Non-neutral	0	Neutral	0.6
17	64222231	G	A	24.5	0.47	0.86262	0.573888	0.959745	3	Deleterious	0.718501	Neutral	6	Benign	0.478	0.16	Neutral	1	Neutral	0.83
17	74383582	A	G	14.88	0.27	0.17215	0.673471	0.966634	4	Deleterious	0.995354	Neutral	8	Benign	0.986	0.23	Neutral	6	Neutral	0.74
4	119948542	C	T	27.2	0.53	0.85018	0.685742	0.999096	3	Neutral	0.0422337	Neutral	6	Benign	0.996	0	Non-neutral	0	Deleterious	0.65
10	124740071	C	T	17.41	0.5	0.15672	0.519653	0.99754	3	Deleterious	0.126233	Neutral	6	Benign	1	0	Neutral	1	Deleterious	0.51
19	58265601	G	A	11.56	0.39	0.13277	0.702456	0.999083	2	Deleterious	0.523766	Disease	1	Benign	0.998	0	Non-neutral	2	Deleterious	0.72
14	73572696	C	G	22	0.61	0.8816	0.724815	0.562118	3	Deleterious	0.908539	Neutral	7	Benign	0.998	0.39	Neutral	6	Neutral	0.74
5	45262042	C	T	25.5	0.53	0.94408	0.602189	0.998308	3	Deleterious	0.931383	Neutral	8	Possibly damaging	0.794	0.02	Neutral	0	Neutral	0.6
8	124357216	T	A	22.3	0.49	0.97116	0.724815	0.995659	4	Deleterious	0.998404	Neutral	1	Benign	0.246	0.07	Neutral	4	Neutral	0.83
10	45799786	C	T	22.5	0.15	0.19495	0.573888	0.996257	2	Deleterious	0.216715	Disease	4	Benign	0.754	0.02	Non-neutral	1	Deleterious	0.55
9	17309068	T	G	25.5	0.38	0.92037	0.658983	0.997941	2	Neutral	4.56094e-06	Neutral	2	Possibly damaging	1	0.01	Neutral	5	Deleterious	0.61
8	15508246	C	T	35	0.38	0.97572	0.659464	0.999386	3	Deleterious	0.282884	Disease	5	Benign	1	0	Non-neutral	1	Deleterious	0.76
12	22796743	G	T	22.9	0.69	0.93765	0.709663	0.990623	2	Deleterious	0.196008	Disease	2	Benign	0.978	0.16	Neutral	2	Neutral	0.63
8	87235284	G	A	14.98	0.17	0.04656	0.573888	0.969167	1	Neutral	0.00757087	Disease	5	Benign	0.942	0.05	Non-neutral	1	Deleterious	0.65
14	64682022	A	C	19.67	0.7	0.96637	0.724815	0.985692	3	Deleterious	0.572302	Neutral	7	Benign	0.32	0.59	Neutral	5	Neutral	0.83
18	61228387	G	A	26	0.28	0.985	0.573888	0.999156	2	Deleterious	0.494468	Disease	7	Benign	1	0	Neutral	2	Deleterious	0.51
10	132965127	C	T	19.05	0.33	0.03551	0.658983	0.995399	2	Deleterious	0.938205	Neutral	8	Possibly damaging	0.998	0.13	Neutral	2	Neutral	0.63
6	151239797	G	A	33	0.7	0.97502	0.732669	0.999307	3	Neutral	0.0435378	Disease	0	Possibly damaging	0.926	0	Non-neutral	2	Deleterious	0.87
12	91558423	C	T	28.5	0.56	0.98663	0.573888	0.999161	3	Neutral	1.95505e-05	Neutral	1	Benign	0.816	0.04	Neutral	5	Neutral	0.6
5	38884071	T	G	0.001	0.33	0.02778	0.653264	0.647561	3	Deleterious	0.892492	Neutral	7	Benign	0.994	0.53	Neutral	3	Neutral	0.74
22	41657461	C	T	24.1	0.45	0.92832	0.702456	0.998112	4	Deleterious	0.925544	Neutral	3	Benign	0.562	0.27	Neutral	5	Neutral	0.74
4	80328537	C	T	28.1	0.48	0.98435	0.573888	0.998015	3	Neutral	0.00672936	Disease	7	Benign	1	0	Non-neutral	4	Deleterious	0.87
15	45364534	A	C	16.7	0.37	0.25753	0.743671	0.72474	2	Deleterious	0.657755	Neutral	3	Benign	1	0.84	Neutral	8	Neutral	0.75
18	48190572	G	A	33	0.3	0.99528	0.653264	0.999217	2	Deleterious	0.294924	Disease	6	Possibly damaging	0.926	0.66	Non-neutral	1	Deleterious	0.55
14	25101228	C	T	15.69	0.36	0.97209	0.624306	0.998078	3	Neutral	0.027349	Disease	9	Benign	1	0	Non-neutral	4	Deleterious	0.87
8	133827057	C	A	28.3	0.71	0.95256	0.608884	0.993113	3	Deleterious	0.977133	Neutral	6	Benign	0.992	0	Neutral	4	Neutral	0.6
19	8922135	C	G	15.71	0.61	0.00886	0.724815	0.997712	3	Neutral	0.0836832	Neutral	5	Possibly damaging	0.738	0	Non-neutral	2	Deleterious	0.65
9	139091685	G	A	20.9	0.21	0.98923	0.596491	0.998492	4	Deleterious	0.215576	Neutral	3	Benign	0.09	0	Neutral	2	Neutral	0.75
5	114473206	C	A	27	0.59	0.96812	0.658983	0.99862	2	Deleterious	0.518708	Neutral	6	Possibly damaging	0.82	0.28	Neutral	7	Neutral	0.68
1	20141519	G	A	6.058	0.08	0.03591	0	0.395875	1	Deleterious	0.4633	Neutral	8	Benign	0.648	0.18	Neutral	5	Neutral	0.75
11	107992346	G	C	12.5	0.27	0.243	0.594344	0.980894	1	Neutral	2.18489e-05	Neutral	7	Possibly damaging	0.22	0.04	Non-neutral	1	Deleterious	0.55
3	121340805	G	A	0.464	0.21	0.26719	0.547309	0.855328	3	Deleterious	0.987658	Neutral	9	Benign	0.992	0.79	Neutral	7	Neutral	0.74
1	23762513	C	T	34	0.3	0.99436	0.643519	0.999422	3	Neutral	0.0484663	Disease	8	Benign	1	0	Non-neutral	3	Deleterious	0.87
2	232325426	A	T	1.01	0.37	0.0754	0.698795	0.60727	3	Deleterious	0.305145	Neutral	6	Benign	0.998	0.23	Neutral	6	Neutral	0.75
3	37053568	A	G	22.3	0.57	0.80196	0.724815	0.986556	4	Deleterious	0.483217	Neutral	9	Benign	0.998	0.31	Neutral	7	Neutral	0.74
10	27687281	C	T	23.1	0.17	0.6687	0.573888	0.991769	1	Neutral	0.000297973	Neutral	8	Benign	0.918	0.2	Neutral	0	Neutral	0.6
13	28636176	C	T	3.522	0.22	0.02278	0.618467	0.134254	2	Deleterious	0.625264	Neutral	9	Benign	1	0.63	Neutral	7	Neutral	0.75
12	132334421	C	T	27	0.41	0.98128	0.723109	0.999262	2	Deleterious	0.520416	Disease	4	Possibly damaging	0.808	0.01	Neutral	4	Deleterious	0.52
8	127569397	C	T	16.46	0.53	0.97034	0.52208	0.998542	2	Neutral	4.04307e-05	Disease	4	Possibly damaging	1	0	Non-neutral	4	Deleterious	0.87
8	141810620	A	G	19.58	0.69	0.99447	0.709663	0.998561	4	Deleterious	0.449474	Disease	4	Benign	0.998	0	Neutral	0	Deleterious	0.61
19	38028549	G	A	9.783	0.178974	0.00709	0.724815	0.555604	1	Deleterious	0.999983	Neutral	3	Benign	0.998	1	Neutral	6	Neutral	0.74
1	109553602	G	T	22.6	0.63	0.98342	0.408882	0.992146	3	Deleterious	0.994525	Neutral	7	Possibly damaging	0.072	0.06	Neutral	3	Neutral	0.74
4	70823297	G	T	10.11	0.445655	0.03944	0.573888	0.986054	1	Deleterious	0.214412	Neutral	1	Benign	0.768	0.01	Non-neutral	2	Deleterious	0.61
7	107399015	A	T	23.6	0.66	0.99227	0.702456	0.986132	4	Neutral	0.0174447	Neutral	5	Benign	1	0.01	Neutral	1	Deleterious	0.61
4	155160334	C	T	24.9	0.44	0.94387	0.547309	0.998833	2	Deleterious	0.999189	Neutral	7	Benign	0.906	0.08	Non-neutral	0	Neutral	0.68
19	44223635	G	A	12.25	0.26	0.25702	0	0.983158	2	Deleterious	0.68423	Neutral	2	Benign	0.768	0.09	Non-neutral	0	Neutral	0.65
13	48615145	C	A	22.3	0.75	0.87315	0.724815	0.994544	2	Neutral	0.015707	Neutral	5	Benign	0.95	0.03	Neutral	2	Deleterious	0.55
16	15123907	G	T	16.15	0.47	0.76624	0.698795	0.987055	2	Deleterious	0.652009	Neutral	7	Benign	0.702	0.28	Neutral	4	Neutral	0.74
19	8550540	C	T	21.7	0.46	0.9376	0.702456	0.997315	3	Neutral	4.34187e-06	Disease	2	Benign	0.968	0	Neutral	3	Deleterious	0.61
1	212548558	G	A	25.4	0.63	0.98667	0.709663	0.998991	3	Neutral	0.0556993	Disease	1	Benign	1	0	Neutral	2	Deleterious	0.61
6	32009824	T	G	21.3	0.33	0.97202	0.658983	0.988419	2	Neutral	0.00141132	Disease	7	Benign	1	0	Neutral	1	Deleterious	0.76
2	32515694	C	A	19.34	0.33	0.83944	0.709663	0.980436	2	Deleterious	0.398173	Neutral	6	Benign	0.396	0.08	Neutral	2	Neutral	0.83
4	72399971	G	A	16.04	0.27	0.91286	0.573888	0.606323	3	Deleterious	0.820418	Neutral	9	Benign	0.796	0.91	Neutral	7	Neutral	0.75
15	90903974	C	T	24.9	0.4	0.24802	0.602189	0.997172	3	Deleterious	0.147198	Neutral	5	Benign	0.554	0.02	Non-neutral	1	Neutral	0.6
2	233245025	C	T	10.13	0.29	0.02637	0.536957	0.997555	2	Neutral	0.0691593	Disease	6	Benign	0.972	0.04	Neutral	0	Deleterious	0.76
1	149879371	C	T	24.9	0.5	0.77979	0.724815	0.997407	3	Deleterious	0.62076	Neutral	8	Benign	0.958	0.25	Neutral	1	Neutral	0.74
11	102819764	G	T	22	0.26	0.90859	0.547309	0.967553	3	Neutral	0.0438796	Disease	2	Benign	0.946	0.29	Neutral	2	Neutral	0.6
12	11546713	C	T	6.303	0.22	0.00778	0.573888	0.65675	1	Neutral	1.2935e-06	Neutral	9	Benign	0.66	0	Neutral	0	Deleterious	0.51
7	53103782	G	A	0.003	0.21	0.00072	0.547309	0.2099	1	Deleterious	0.745522	Neutral	9	Benign	0.996	0.9	Neutral	5	Neutral	0.74
15	90785060	C	T	15.16	0.28	0.58156	0.658983	0.984941	2	Deleterious	0.174237	Neutral	7	Benign	0.632	0.06	Neutral	3	Neutral	0.74
19	12296660	G	C	23.7	0.54	0.04075	0.65145	0.993421	2	Deleterious	0.20343	Disease	8	Benign	0.698	0.02	Non-neutral	0	Deleterious	0.72
10	7774362	C	T	22.8	0.29	0.71853	0.573888	0.996412	4	Deleterious	0.448404	Neutral	5	Benign	0.6	0.22	Neutral	5	Neutral	0.74
9	77448961	G	A	24.5	0.43	0.90792	0.602189	0.996384	3	Deleterious	0.232617	Disease	2	Benign	0.474	0.01	Neutral	6	Neutral	0.65
3	123665877	C	T	0.072	0.415348	0.00225	0.724815	0.194043	2	Deleterious	0.91448	Neutral	8	Benign	0.982	0.78	Neutral	6	Neutral	0.74
17	67181653	G	A	0.989	0.31	0.01336	0.547309	0.948085	1	Deleterious	0.201653	Neutral	8	Benign	0.034	0.12	Neutral	2	Neutral	0.83
15	86813153	C	A	2.53	0.15	0.7076	0.547309	0.666203	1	Deleterious	0.435365	Neutral	3	Benign	0.988	0.64	Neutral	2	Neutral	0.75
8	37693258	G	A	20.4	0.62	0.97822	0.576033	0.999146	2	Deleterious	0.466249	Neutral	4	Benign	1	0	Neutral	5	Deleterious	0.51
2	58316814	A	G	23.7	0.64	0.91874	0.653264	0.998749	3	Neutral	0.064678	Neutral	8	Benign	0.188	0.04	Neutral	5	Neutral	0.71
7	91871403	C	T	22.7	0.64	0.99382	0.658983	0.999496	3	Deleterious	0.164346	Disease	2	Benign	1	0	Neutral	4	Deleterious	0.61
1	202698951	G	A	34	0.64	0.99439	0.702456	0.99915	3	Neutral	0.0122279	Neutral	1	Benign	0.98	0	Non-neutral	1	Deleterious	0.76
6	116747852	C	A	19.95	0.62	0.93004	0.743671	0.984463	3	Neutral	0.0640513	Neutral	6	Benign	0.26	0.15	Neutral	6	Neutral	0.74
16	71803557	C	T	23.8	0.48	0.9876	0.724815	0.997039	4	Deleterious	0.91548	Neutral	5	Benign	0.23	0.7	Neutral	6	Neutral	0.83
1	227333279	G	A	33	0.49	0.95185	0.653264	0.999301	2	Deleterious	0.207755	Disease	2	Benign	1	0	Non-neutral	0	Deleterious	0.76
19	10747096	G	A	22.5	0.69	0.9181	0.698795	0.994691	3	Neutral	0.00148538	Disease	6	Possibly damaging	0.618	0.2	Non-neutral	0	Deleterious	0.65
7	127222277	C	T	22.5	0.4	0.90719	0.723133	0.989502	3	Deleterious	0.915317	Neutral	8	Benign	0.998	0.34	Neutral	5	Neutral	0.74
10	70332672	T	A	20.6	0.23	0.28995	0.702456	0.961854	2	Deleterious	0.944889	Neutral	7	Benign	0.616	0.05	Neutral	3	Neutral	0.74
9	80412493	C	T	35	0.69	0.97392	0.709663	0.999599	4	Neutral	0.134277	Disease	6	Benign	0.998	0	Non-neutral	1	Deleterious	0.76
20	57036316	G	A	22.8	0.3	0.05908	0.602189	0.998236	3	Neutral	0.0752927	Neutral	2	Benign	0.998	0.05	Non-neutral	1	Deleterious	0.61
10	105362558	G	A	15.7	0.26	0.38186	0.723109	0.923468	1	Neutral	0.0693365	Neutral	9	Benign	0.984	0.08	Neutral	5	Neutral	0.68
21	31062113	G	A	26.3	0.37	0.98394	0.573888	0.999121	3	Deleterious	0.390462	Disease	6	Benign	1	0.04	Neutral	1	Deleterious	0.51
14	20404233	G	A	22.9	0.33	0.95357	0.573888	0.989679	2	Neutral	0.000250685	Neutral	3	Benign	0.202	0.01	Non-neutral	2	Deleterious	0.51
8	124665021	C	T	21	0.27	0.97281	0.573078	0.999538	2	Neutral	0.00214366	Disease	8	Benign	1	0	Non-neutral	3	Deleterious	0.87
17	47300070	G	T	19.16	0.28	0.50571	0.731555	0.995732	4	Deleterious	0.998158	Neutral	4	Benign	0.986	0	Neutral	1	Neutral	0.63
6	31324536	T	A	7.924	0.2	0.00473	0.851219	0.539634	2	Deleterious	0.737297	Neutral	8	Benign	0.998	0.66	Neutral	7	Neutral	0.74
2	152322315	C	T	8.828	0.34	0.20755	0.702456	0.125911	3	Deleterious	0.650005	Neutral	8	Benign	0.996	0.25	Neutral	1	Neutral	0.75
8	95390410	G	T	19.2	0.37	0.78143	0.709663	0.770437	4	Deleterious	0.21094	Neutral	5	Benign	0.98	0.86	Neutral	7	Neutral	0.74
2	200797855	C	T	22.4	0.69	0.98535	0.743671	0.997783	2	Deleterious	0.990006	Neutral	9	Benign	0.516	0.17	Neutral	6	Neutral	0.75
8	124266335	C	G	21.3	0.62	0.97213	0.658983	0.997931	4	Deleterious	0.123639	Neutral	4	Benign	1	0	Neutral	5	Deleterious	0.51
10	95095718	G	A	22.9	0.34	0.94868	0.602189	0.998441	2	Deleterious	0.437651	Neutral	3	Benign	0.922	0.08	Neutral	7	Neutral	0.74
1	201022696	C	T	19.97	0.32	0.84334	0.600433	0.999405	3	Deleterious	0.460806	Disease	1	Possibly damaging	0.554	0.09	Neutral	1	Neutral	0.6
11	107502339	G	A	22.3	0.475472	0.90018	0.618467	0.942249	2	Deleterious	0.4581	Neutral	8	Benign	0.218	0.52	Neutral	4	Neutral	0.83
14	75295925	A	G	32	0.6	0.99392	0.724815	0.989429	2	Neutral	0.00455961	Neutral	2	Benign	1	0.03	Non-neutral	2	Deleterious	0.61
3	165548691	A	T	10.69	0.52	0.16451	0.653264	0.63479	3	Deleterious	0.403633	Disease	5	Benign	1	0.61	Neutral	6	Neutral	0.63
6	30653521	C	T	22.1	0.49	0.73449	0	0.996733	2	Deleterious	0.228051	Neutral	8	Benign	0.456	0.5	Neutral	5	Neutral	0.83
1	186316571	T	G	5.987	0.39	0.91383	0.724815	0.793512	2	Deleterious	0.292454	Neutral	8	Benign	0.994	0.26	Neutral	2	Neutral	0.74
10	26491897	G	C	24.2	0.56	0.93262	0.573888	0.999209	3	Deleterious	0.155794	Neutral	6	Benign	0.798	0	Non-neutral	2	Deleterious	0.61
12	122658410	G	A	5.427	0.17	0.07946	0.573888	0.98759	3	Deleterious	0.277017	Neutral	5	Benign	1	0	Non-neutral	2	Deleterious	0.61
4	104511150	A	T	19.87	0.35	0.98746	0.547309	0.992311	2	Neutral	0.0493796	Disease	4	Benign	1	0	Non-neutral	0	Deleterious	0.87
5	74638449	C	G	19.64	0.63	0.96445	0.732669	0.987045	4	Neutral	0.065675	Disease	0	Benign	0.976	0.13	Neutral	1	Neutral	0.6
19	15067448	C	T	22.7	0.31	0.85843	0.658983	0.992067	2	Deleterious	0.847584	Disease	6	Benign	0.988	0.29	Neutral	8	Neutral	0.63
20	31890858	G	A	15	0.110236	0.02937	0.547309	0.984015	1	Deleterious	0.131402	Disease	3	Benign	0.736	0.13	Neutral	5	Neutral	0.65
17	73949540	G	C	22.4	0.45	0.92598	0.724815	0.920855	4	Deleterious	0.756113	Neutral	6	Benign	0.844	0.21	Neutral	7	Neutral	0.74
6	52993048	G	T	11.52	0.36	0.81599	0.547309	0.844005	3	Deleterious	0.999717	Neutral	2	Possibly damaging	0.254	0.02	Non-neutral	1	Neutral	0.6
16	8995050	G	A	27.6	0.53	0.95993	0.724815	0.998734	4	Neutral	0.0870072	Disease	2	Benign	0.872	0	Non-neutral	1	Deleterious	0.87
2	69174345	G	C	23.1	0.28	0.32422	0.547309	0.996355	2	Neutral	0.000173462	Neutral	6	Benign	0.994	0.16	Non-neutral	4	Deleterious	0.61
4	119952572	C	T	34	0.378876	0.96292	0.658983	0.999099	3	Neutral	4.67023e-05	Disease	4	Benign	1	0	Neutral	2	Deleterious	0.76
11	55541597	G	A	0.018	0.26	0.01948	0.573888	0.58973	1	Neutral	0.0293057	Neutral	5	Benign	1	0.13	Neutral	4	Neutral	0.63
14	24795366	C	T	26.7	0.24	0.87135	0.578056	0.999384	3	Deleterious	0.192224	Neutral	5	Benign	0.746	0.1	Neutral	3	Neutral	0.74
9	140330501	G	T	7.919	0.27	0.00975	0.576033	0.96483	1	Deleterious	0.115831	Neutral	6	Benign	0.704	0.01	Non-neutral	2	Neutral	0.6
2	174774887	G	A	23.3	0.67	0.95739	0.702456	0.993697	3	Deleterious	0.271777	Disease	6	Benign	0.914	0.07	Neutral	3	Neutral	0.63
19	51021354	G	A	16.87	0.31	0.81201	0.723109	0.997843	2	Deleterious	0.845879	Neutral	7	Benign	0.952	0	Non-neutral	2	Deleterious	0.55
12	110232198	A	T	22.5	0.38	0.82484	0.67347	0.959994	3	Neutral	1.0387e-06	Disease	5	Benign	0.862	0.1	Non-neutral	3	Deleterious	0.72
9	107361490	A	T	16.23	0.23	0.01173	0.573888	0.99236	1	Neutral	0.0586414	Neutral	5	Benign	0.628	0.07	Neutral	4	Neutral	0.71
9	100672338	C	T	0.765	0.24	0.0265	0.658983	0.735498	2	Deleterious	0.926685	Neutral	7	Benign	0.958	0.18	Neutral	5	Neutral	0.74
16	14743742	G	T	19.82	0.51	0.9149	0.702456	0.993885	3	Deleterious	0.340897	Neutral	4	Benign	0.984	0.42	Neutral	3	Neutral	0.74
5	63256285	C	T	17.52	0.25	0.85928	0.64067	0.999316	3	Deleterious	0.887747	Disease	4	Benign	1	0	Neutral	2	Deleterious	0.61
1	110280786	C	T	21.8	0.7	0.96196	0.693144	0.999053	3	Deleterious	0.877836	Neutral	1	Benign	0.856	0.06	Neutral	4	Neutral	0.74
12	56827690	G	A	35	0.48	0.9592	0.724815	0.999454	4	Neutral	0.004244	Disease	4	Possibly damaging	0.998	0.01	Non-neutral	3	Deleterious	0.87
17	61901197	T	A	21.6	0.4	0.16636	0.702456	0.939675	4	Neutral	0.0106141	Neutral	7	Benign	1	0.05	Neutral	1	Neutral	0.63
4	169327198	T	C	23.1	0.45	0.72548	0.573888	0.998176	2	Deleterious	0.70461	Neutral	8	Benign	0.088	0.11	Neutral	0	Neutral	0.83
19	45849899	T	A	22.4	0.25	0.98565	0.440796	0.996498	2	Deleterious	0.985839	Disease	6	Benign	0.992	0	Non-neutral	0	Deleterious	0.65
1	152733646	C	T	23	0.18	0.16133	0.573888	0.998069	2	Neutral	0.0118625	Neutral	6	Benign	0.456	0.1	Neutral	3	Neutral	0.74
2	163045640	G	A	25.1	0.62	0.98542	0.573888	0.99896	3	Deleterious	0.174822	Neutral	3	Benign	0.946	0	Neutral	1	Deleterious	0.51
7	150769065	C	T	22.3	0.44	0.71634	0.724815	0.999419	3	Neutral	0.0288394	Disease	9	Benign	1	0	Non-neutral	3	Deleterious	0.87
10	75258550	G	A	21.8	0.62	0.98202	0.724815	0.999098	3	Neutral	0.0231621	Neutral	5	Benign	1	0	Neutral	0	Deleterious	0.61
4	119154278	G	T	28.3	0.42	0.94861	0.573888	0.960816	3	Deleterious	0.190718	Disease	0	Benign	0.974	0	Neutral	0	Deleterious	0.51
11	71932744	C	A	8.91	0.3	0.24314	0.573078	0.755695	2	Deleterious	0.999933	Neutral	7	Possibly damaging	0.704	0.3	Neutral	1	Neutral	0.68
14	55411180	G	A	26.7	0.62	0.94077	0.709663	0.998549	3	Neutral	0.00930427	Neutral	4	Benign	0.818	0	Non-neutral	2	Deleterious	0.76
5	149755455	G	T	22.1	0.25	0.83513	0.702456	0.987619	2	Neutral	0.00738252	Neutral	7	Benign	0.73	0.45	Neutral	5	Neutral	0.68
1	247587535	G	T	4.284	0.17	0.7459	0.547309	0.650703	2	Deleterious	0.97178	Neutral	8	Benign	0.998	0.44	Neutral	6	Neutral	0.74
1	40928144	C	T	8.23	0.41	6e-05	0.608884	0.990158	2	Deleterious	0.517915	Disease	3	Benign	0.946	0.39	Neutral	0	Neutral	0.63
22	18640577	C	G	12.91	0.27	0.24387	0.459711	0.970309	2	Deleterious	0.349218	Neutral	2	Benign	0.22	0	Neutral	0	Neutral	0.75
12	53865444	G	A	22.3	0.52	0.9736	0.702456	0.99802	3	Deleterious	0.383706	Disease	6	Possibly damaging	0.898	0	Neutral	3	Deleterious	0.61
7	148801579	G	T	23.9	0.14	0.61636	0.663124	0.986938	4	Deleterious	0.180666	Neutral	3	Benign	0.862	0.04	Non-neutral	1	Neutral	0.6
5	147889037	C	T	27.1	0.45	0.99263	0.573888	0.996023	4	Neutral	0.0326664	Neutral	3	Benign	0.324	0.2	Neutral	1	Neutral	0.74
17	10427956	G	A	15.19	0.47	0.52356	0.653264	0.999132	3	Neutral	0.0402734	Disease	3	Benign	0.998	0	Neutral	1	Deleterious	0.76
1	158532955	G	T	15.8	0.17	0.23654	0.573888	0.976252	2	Neutral	1.73869e-05	Disease	1	Possibly damaging	0.164	0	Non-neutral	2	Deleterious	0.72
19	18100609	C	T	27	0.63	0.89843	0.283776	0.999271	2	Neutral	0.00229614	Disease	1	Benign	1	0	Non-neutral	3	Deleterious	0.87
22	45291957	C	T	34	0.41	0.97153	0.702456	0.99936	3	Neutral	1.81659e-05	Disease	5	Possibly damaging	1	0	Neutral	5	Deleterious	0.72
10	88911830	C	A	18.82	0.37	0.64764	0.709663	0.987476	2	Neutral	0.0163998	Neutral	6	Benign	0.998	0.03	Non-neutral	1	Deleterious	0.65
6	28333299	T	G	10.79	0.4	0.05157	0.608884	0.932666	1	Deleterious	0.345607	Neutral	4	Benign	0.998	0.5	Neutral	6	Neutral	0.75
4	99997568	C	T	23.2	0.62	0.97583	0.702456	0.955053	2	Deleterious	0.955785	Neutral	0	Benign	1	1	Neutral	6	Neutral	0.75
19	41351863	T	C	17.7	0.12	0.96063	0	0.99851	2	Deleterious	0.132625	Neutral	3	Possibly damaging	0.974	0.11	Neutral	0	Neutral	0.63
12	91449902	G	A	23.7	0.31	0.99434	0.573888	0.998913	2	Deleterious	0.807234	Neutral	7	Benign	0.802	0.05	Neutral	2	Neutral	0.74
17	33266229	G	A	28.1	0.45	0.90566	0.618467	0.997863	3	Deleterious	0.673102	Disease	3	Benign	0.972	0	Neutral	3	Neutral	0.6
16	71603782	C	T	20.7	0.37	0.84714	0.547309	0.800161	3	Deleterious	0.940967	Disease	2	Benign	0.994	0.35	Neutral	0	Neutral	0.63
1	234367487	G	A	13.72	0.36	0.92857	0.050388	0.975356	3	Deleterious	0.99886	Neutral	4	Benign	0.32	0.45	Neutral	3	Neutral	0.83
3	167039933	C	T	29.1	0.47	0.88473	0.573888	0.997753	2	Neutral	2.91539e-05	Neutral	6	Possibly damaging	0.992	0	Non-neutral	3	Deleterious	0.72
1	24419481	G	A	19.89	0.39	0.59324	0.547309	0.997147	2	Neutral	0.0269855	Disease	4	Benign	0.602	0	Non-neutral	1	Deleterious	0.65
17	67085656	G	A	0.218	0.18	0.01579	0.573888	0.267467	2	Deleterious	0.724645	Neutral	5	Benign	0.988	0.5	Neutral	5	Neutral	0.74
4	39308225	G	A	19.38	0.63	0.96248	0.702456	0.998574	4	Deleterious	0.220975	Neutral	1	Possibly damaging	0.516	0	Neutral	1	Deleterious	0.51
3	68466553	G	A	22.3	0.32	0.9554	0.547309	0.969979	2	Deleterious	0.826476	Neutral	2	Benign	0.778	0.56	Neutral	2	Neutral	0.74
7	84628871	C	T	23.9	0.51	0.683	0.550215	0.996868	3	Deleterious	0.4712	Neutral	6	Benign	0.714	0.41	Neutral	2	Neutral	0.74
22	46653000	C	T	22.5	0.08	0.15374	0.59043	0.992744	2	Deleterious	0.980769	Neutral	8	Benign	0.282	0.48	Neutral	2	Neutral	0.83
2	163031377	C	T	22.5	0.54	0.98149	0.547309	0.999016	3	Neutral	0.0337771	Disease	4	Benign	0.962	0.01	Neutral	2	Deleterious	0.55
12	56500474	T	C	22.3	0.53	0.98831	0.702456	0.998817	4	Deleterious	0.983623	Disease	3	Possibly damaging	0.998	0	Non-neutral	1	Deleterious	0.65
6	100957829	T	A	21.7	0.48	0.93521	0.743671	0.90102	2	Deleterious	0.411306	Neutral	7	Benign	1	0.69	Neutral	3	Neutral	0.75
2	220047058	G	A	10.65	0.36	0.11668	0.724815	0.530929	3	Deleterious	0.635613	Neutral	8	Benign	1	1	Neutral	7	Neutral	0.75
2	88405935	C	T	12.36	0.24	0.79134	0.618467	0.122958	3	Deleterious	0.866119	Neutral	1	Benign	0.986	1	Neutral	1	Neutral	0.75
17	71165666	C	T	21.8	0.31	0.98845	0.575934	0.999004	3	Deleterious	0.183308	Neutral	8	Benign	0.94	0.02	Non-neutral	0	Neutral	0.6
11	65628334	G	A	17.23	0.45	0.40921	0.52208	0.998852	3	Deleterious	0.82971	Neutral	8	Benign	0.992	0.11	Non-neutral	0	Neutral	0.6
10	89653800	T	G	32	0.38	0.97162	0.602189	0.995243	3	Neutral	0.000727461	Disease	9	Benign	1	0	Non-neutral	2	Deleterious	0.87
9	140115044	G	T	16.99	0.53	0.87617	0.723109	0.996838	3	Neutral	4.73035e-06	Disease	4	Benign	0.998	0	Non-neutral	1	Deleterious	0.72
1	75602794	G	A	22.4	0.41	0.79262	0.606884	0.998144	2	Deleterious	0.173413	Neutral	8	Benign	0.796	0.4	Neutral	1	Neutral	0.74
9	134465325	G	A	35	0.33	0.95709	0.723109	0.999461	3	Deleterious	0.738948	Disease	3	Benign	1	0	Non-neutral	3	Deleterious	0.72
21	40568892	T	C	0.055	0.65	0.16883	0.702456	0.224872	2	Deleterious	0.144776	Neutral	9	Benign	1	0.24	Neutral	3	Neutral	0.75
6	155561736	G	A	17.83	0.41	0.96764	0.643519	0.994904	3	Deleterious	0.370509	Neutral	1	Benign	0.556	0.43	Neutral	0	Neutral	0.74
17	61914891	C	T	22.6	0.39	0.97877	0.723133	0.994621	3	Deleterious	0.730225	Neutral	4	Possibly damaging	0.994	0.04	Non-neutral	0	Deleterious	0.55
19	49362808	G	A	16.12	0.56	0.14803	0.693117	0.999017	3	Neutral	0.0174729	Neutral	3	Benign	0.996	0	Non-neutral	1	Deleterious	0.76
8	87151852	G	A	16.2	0.38	0.98447	0.547309	0.998574	2	Neutral	0.0484332	Disease	7	Possibly damaging	0.998	0	Non-neutral	1	Deleterious	0.87
2	162881323	G	T	11.13	0.55	0.01035	0.658983	0.774333	3	Deleterious	0.701533	Neutral	4	Benign	0.994	0.53	Neutral	5	Neutral	0.74
17	30534025	G	C	17.36	0.55	0.99468	0.743671	0.980185	3	Deleterious	0.979486	Neutral	4	Possibly damaging	0.898	0.13	Neutral	4	Neutral	0.65
14	20404636	C	T	21.4	0.3	0.07389	0.573888	0.997908	2	Deleterious	0.348741	Neutral	8	Benign	0.502	0	Neutral	4	Neutral	0.63
20	10258351	C	T	22.1	0.27	0.96306	0.602189	0.999329	4	Neutral	0.00452183	Disease	5	Benign	0.998	0	Non-neutral	3	Deleterious	0.87
2	166892848	C	T	25.2	0.47	0.9841	0.547309	0.998013	3	Deleterious	0.813563	Disease	4	Benign	0.262	0	Neutral	5	Neutral	0.63
12	93804913	C	G	19.43	0.67	0.98338	0.743671	0.998252	3	Neutral	0.00649148	Disease	2	Benign	0.92	0.01	Neutral	4	Deleterious	0.65
3	137822474	G	A	16.59	0.481645	0.22672	0.658983	0.998961	3	Neutral	0.0272112	Neutral	5	Benign	1	0	Non-neutral	1	Deleterious	0.72
11	20629149	C	G	22.3	0.27	0.81772	0.59043	0.995413	2	Deleterious	0.527312	Neutral	2	Benign	0.958	0.06	Neutral	2	Neutral	0.74
20	57484421	G	A	35	0.43	0.98857	0.702456	0.999335	4	Deleterious	0.061126	Disease	8	Benign	1	0	Non-neutral	2	Deleterious	0.87
21	46000140	C	T	0.64	0.19	0.00741	0.618376	0.747563	1	Deleterious	0.832242	Neutral	8	Benign	0.944	0.43	Neutral	2	Neutral	0.74
9	27206739	C	T	22	0.43	0.96194	0.743671	0.999259	3	Deleterious	0.477991	Neutral	1	Benign	1	0.02	Non-neutral	1	Deleterious	0.61
8	27462570	G	A	0.007	0.23	0.00921	0.724815	0.479174	3	Deleterious	0.684503	Neutral	8	Benign	0.888	0.46	Neutral	6	Neutral	0.74
9	85622385	C	T	23.2	0.22	0.94801	0.602189	0.993632	2	Deleterious	0.491117	Neutral	7	Benign	0.324	0.18	Non-neutral	2	Neutral	0.75
22	46748195	T	C	24	0.47	0.8767	0.702456	0.997611	3	Deleterious	0.492631	Neutral	8	Benign	0.982	0.07	Neutral	0	Neutral	0.74
15	34382552	G	A	22.7	0.8	0.99423	0.709663	0.998266	2	Neutral	0.0106272	Neutral	5	Benign	0.846	0.04	Neutral	1	Neutral	0.6
14	102792953	C	T	24.2	0.41	0.68073	0.608884	0.993737	2	Deleterious	0.109501	Neutral	5	Benign	0.772	0.15	Non-neutral	0	Neutral	0.6
10	101953784	C	G	21.8	0.56	0.9452	0.724815	0.911953	3	Deleterious	0.467268	Neutral	9	Benign	1	0.54	Neutral	5	Neutral	0.75
2	28812900	G	A	0.378	0.17	0.00097	0.547309	0.610992	1	Deleterious	0.930749	Neutral	3	Benign	1	0.43	Neutral	8	Neutral	0.75
8	120577158	T	G	15.99	0.28	0.84918	0.653264	0.997289	2	Deleterious	0.900673	Disease	4	Benign	0.492	0	Neutral	5	Neutral	0.63
13	28155696	C	G	31	0.305562	0.97744	0.709663	0.997562	4	Deleterious	0.738033	Neutral	6	Benign	0.334	0.24	Neutral	0	Neutral	0.83
6	52768479	C	T	0.002	0.494819	0.00186	0.573888	0.436741	1	Deleterious	0.889479	Neutral	9	Benign	1	0.71	Neutral	5	Neutral	0.63
20	23421079	A	G	17	0.23	0.52527	0.547309	0.795406	2	Deleterious	0.218206	Neutral	7	Benign	0.976	0.83	Neutral	4	Neutral	0.74
3	185975715	G	A	19.38	0.35	0.97353	0.547309	0.996838	3	Deleterious	0.127675	Disease	6	Possibly damaging	0.972	0.02	Neutral	0	Deleterious	0.61
2	20180518	C	T	28.6	0.53	0.98528	0.724815	0.998237	3	Deleterious	0.119971	Disease	3	Benign	0.05	0.08	Neutral	0	Neutral	0.75
9	137713982	C	T	23.6	0.29	0.98918	0.645312	0.996579	3	Deleterious	0.568979	Neutral	6	Benign	0.924	0.07	Neutral	3	Neutral	0.74
14	23888796	C	T	22.5	0.35	0.97505	0.578056	0.99953	3	Deleterious	0.929074	Disease	1	Benign	0.768	0	Neutral	6	Deleterious	0.55
6	28333617	C	T	22.7	0.51	0.05944	0.724815	0.952916	2	Deleterious	0.955648	Neutral	5	Benign	0.988	1	Neutral	6	Neutral	0.74
19	41354538	G	C	1.59	0.33	0.00408	0.666236	0.380851	1	Deleterious	1	Neutral	8	Benign	1	1	Neutral	8	Neutral	0.75
4	71398172	G	A	25.4	0.27	0.67443	0.615948	0.996881	2	Deleterious	0.301264	Neutral	7	Benign	0.826	0.08	Non-neutral	3	Neutral	0.63
1	89434486	G	C	22.7	0.71	0.9924	0.709663	0.97426	3	Deleterious	0.916132	Neutral	8	Benign	1	0.47	Neutral	8	Neutral	0.75
20	49626275	C	T	13.08	0.49	0.13904	0.723109	0.930829	2	Deleterious	0.61941	Neutral	7	Benign	0.996	0.81	Neutral	0	Neutral	0.75
19	54760417	C	T	0.019	0.26	0.00056	0.657636	0.910486	2	Deleterious	0.999672	Disease	6	Benign	0.152	0.02	Non-neutral	1	Neutral	0.6
12	47630056	C	T	6.119	0.37	0.00809	0.658983	0.926577	1	Deleterious	0.650811	Neutral	2	Benign	0.998	0.18	Non-neutral	1	Neutral	0.63
20	45130663	C	T	22.1	0.44	0.00454	0.702456	0.912531	2	Neutral	0.0100031	Disease	1	Possibly damaging	0.59	0	Non-neutral	4	Deleterious	0.87
19	11598640	C	T	9.028	0.4	0.13761	0.645312	0.946853	2	Deleterious	0.147557	Neutral	9	Benign	0.954	0.09	Non-neutral	0	Neutral	0.65
2	27730590	A	G	5.772	0.22	0.52149	0.602189	0.755552	2	Deleterious	0.287935	Neutral	9	Benign	1	0.46	Neutral	6	Neutral	0.75
6	31324666	A	C	0.259	0.27	0.00558	0.851219	0.170437	2	Deleterious	0.783888	Neutral	8	Benign	0.996	1	Neutral	6	Neutral	0.74
1	45294707	C	T	14.14	0.51	0.04796	0.602189	0.790201	2	Deleterious	0.435975	Neutral	9	Benign	0.998	0.33	Neutral	6	Neutral	0.74
2	80529599	G	T	19.67	0.34	0.96875	0.64067	0.988644	2	Deleterious	0.189905	Disease	5	Benign	0.462	0	Non-neutral	2	Deleterious	0.61
2	70931504	C	T	21.4	0.37	0.93993	0.723109	0.999355	2	Deleterious	0.375936	Disease	5	Benign	0.792	0.05	Neutral	1	Neutral	0.63
12	91449722	C	T	22.7	0.28	0.93403	0.573888	0.998929	2	Deleterious	0.472709	Disease	8	Benign	0.428	0.02	Neutral	4	Neutral	0.63
7	129950821	G	A	25	0.25	0.99532	0.573888	0.998492	2	Deleterious	0.582325	Disease	2	Benign	0.998	0.01	Neutral	1	Neutral	0.6
8	134225219	G	A	22.8	0.28	0.76521	0.547309	0.999292	2	Deleterious	0.985308	Neutral	6	Benign	1	0.12	Neutral	3	Neutral	0.75
11	33087551	A	C	14.78	0.44	0.98934	0.779548	0.986409	2	Deleterious	0.417236	Disease	4	Benign	0.882	0.03	Neutral	0	Deleterious	0.61
14	78374153	G	A	14.91	0.36	0.08796	0.643519	0.992694	3	Deleterious	0.965092	Neutral	2	Benign	0.942	0.12	Neutral	4	Neutral	0.74
5	54327430	G	A	21.3	0.49	0.92416	0.547309	0.998186	3	Neutral	0.00257661	Disease	6	Possibly damaging	1	0	Non-neutral	5	Deleterious	0.87
22	50727255	G	A	18.23	0.54	0.0441	0.723109	0.451296	2	Deleterious	0.692575	Neutral	6	Benign	0.926	0.07	Neutral	2	Neutral	0.74
1	57397551	C	T	15.11	0.11	0.21291	0.060301	0.918179	2	Neutral	0.0437903	Disease	6	Benign	0.794	0.17	Non-neutral	0	Deleterious	0.55
13	21370361	G	A	23.5	0.46	0.98992	0.743671	0.996731	2	Neutral	0.020028	Neutral	6	Possibly damaging	0.74	0.02	Neutral	3	Deleterious	0.52
8	17400898	G	A	22.9	0.22	0.98267	0.709663	0.990735	4	Deleterious	0.959457	Neutral	2	Benign	0.588	0.15	Neutral	6	Neutral	0.74
1	168054942	C	T	29.2	0.68	0.99617	0.709663	0.998741	3	Neutral	0.000142051	Neutral	5	Benign	0.814	0.01	Non-neutral	2	Deleterious	0.55
3	133478162	G	A	21.8	0.39	0.3082	0.607795	0.988344	3	Deleterious	0.102573	Neutral	7	Benign	0.322	0.27	Neutral	4	Neutral	0.83
2	183104880	G	A	34	0.62	0.86332	0.573888	0.999274	3	Deleterious	0.195837	Disease	4	Benign	1	0	Non-neutral	2	Deleterious	0.76
7	5922207	C	T	27.7	0.17	0.56649	0.602189	0.998696	2	Deleterious	0.272601	Neutral	4	Benign	0.986	0.08	Non-neutral	0	Neutral	0.6
9	33258984	C	G	22.3	0.67	0.97362	0.702456	0.997766	4	Deleterious	0.358053	Neutral	8	Possibly damaging	0.652	0.14	Neutral	0	Neutral	0.65
19	49254351	C	T	1.506	0.3	0.04013	0.779548	0.821446	2	Deleterious	0.780533	Neutral	8	Benign	1	0.59	Neutral	1	Neutral	0.75
2	70910878	C	T	22.5	0.51	0.99271	0.724815	0.999357	2	Deleterious	0.126753	Disease	4	Benign	0.916	0	Non-neutral	2	Deleterious	0.61
20	42825852	G	A	25	0.55	0.86719	0.702456	0.998519	2	Neutral	0.0265593	Neutral	7	Benign	0.444	0.01	Neutral	2	Neutral	0.65
14	23531415	G	A	22.7	0.46	0.67297	0.697927	0.99913	4	Deleterious	0.188859	Neutral	0	Possibly damaging	0.996	0	Neutral	0	Deleterious	0.51
1	33745906	G	C	22.6	0.61	0.98038	0.723109	0.997902	3	Neutral	0.06336	Neutral	1	Benign	0.98	0.45	Non-neutral	2	Neutral	0.6
19	9204708	C	T	23.6	0.3	0.02064	0.573888	0.997005	2	Deleterious	0.272471	Disease	1	Possibly damaging	0.856	0	Non-neutral	1	Deleterious	0.65
10	21074807	C	T	34	0.34	0.98563	0.659464	0.999262	3	Neutral	8.49569e-05	Disease	5	Benign	1	0.09	Neutral	6	Deleterious	0.61
7	129917687	C	T	34	0.57	0.40014	0.550215	0.999287	3	Neutral	0.0084716	Disease	8	Benign	1	0	Non-neutral	3	Deleterious	0.87
1	89414882	C	T	25.8	0.56	0.96031	0.724815	0.999081	3	Deleterious	0.697396	Disease	6	Benign	0.196	0.31	Neutral	2	Neutral	0.75
10	101959766	G	A	30	0.65	0.99083	0.743671	0.999081	3	Deleterious	0.379501	Neutral	2	Benign	0.998	0.01	Non-neutral	1	Deleterious	0.61
3	44685219	G	T	16.92	0.52	0.06099	0.65145	0.983231	2	Neutral	0.00657781	Neutral	5	Benign	0.998	0.06	Non-neutral	3	Deleterious	0.51
1	160523894	G	T	10.37	0.59	0.0336	0.573888	0.990933	2	Deleterious	0.150725	Neutral	1	Possibly damaging	0.872	0.01	Non-neutral	1	Deleterious	0.61
11	129728494	G	A	11.42	0.29	0.03974	0.514364	0.303598	1	Deleterious	0.158409	Neutral	4	Benign	0.874	0.63	Neutral	0	Neutral	0.74
8	21976480	G	A	18.42	0.33	0.80274	0	0.995556	2	Neutral	6.222e-06	Neutral	1	Benign	1	0.04	Neutral	2	Deleterious	0.61
18	34298520	C	T	35	0.47	0.96785	0.658983	0.999417	2	Deleterious	0.157234	Disease	7	Benign	1	0	Non-neutral	1	Deleterious	0.76
8	17507449	A	C	28.8	0.52	0.99464	0.618467	0.997776	2	Neutral	2.19455e-07	Disease	8	Benign	1	0	Neutral	1	Deleterious	0.76
20	34243211	T	C	20.6	0.65	0.94504	0.702456	0.890023	3	Deleterious	0.351675	Neutral	6	Benign	0.648	0.46	Neutral	3	Neutral	0.74
22	46655306	C	T	0.002	0.29	0.01614	0.577349	0.821873	2	Deleterious	0.901725	Neutral	2	Benign	0.902	0.54	Neutral	2	Neutral	0.74
2	220439659	A	G	7.483	0.17	0.34278	0.645312	0.59837	2	Deleterious	0.121516	Neutral	8	Benign	0.998	0.65	Neutral	5	Neutral	0.75
20	17956428	T	G	20.2	0.39	0.98204	0.702456	0.990293	2	Neutral	0.000789539	Disease	4	Benign	0.848	0.02	Neutral	1	Deleterious	0.76
16	11645658	T	A	0.857	0.16	0.00086	0.670488	0.375436	1	Neutral	0.00285579	Neutral	6	Benign	1	0.19	Neutral	3	Deleterious	0.51
4	39929628	G	A	19.73	0.7	0.91497	0.709663	0.998823	3	Neutral	2.42337e-05	Disease	9	Benign	1	0	Non-neutral	6	Deleterious	0.87
16	24975609	G	A	31	0.61	0.98381	0.724815	0.998245	3	Deleterious	0.682928	Disease	5	Benign	0.918	0	Non-neutral	1	Deleterious	0.65
10	74879901	G	C	4.193	0.59	0.10548	0.658983	0.624151	3	Deleterious	0.423691	Neutral	6	Benign	0.98	0.3	Neutral	1	Neutral	0.74
11	55418737	C	T	23.7	0.31	0.7676	0.573888	0.990832	2	Neutral	0.000307636	Neutral	4	Possibly damaging	0.254	0.01	Non-neutral	4	Deleterious	0.61
19	54684811	T	C	21.8	0.52	0.35494	0.723109	0.996756	3	Neutral	0.0825939	Disease	7	Benign	0.556	0.41	Non-neutral	0	Deleterious	0.52
22	22324724	C	T	16.38	0.44	0.93351	0.697927	0.998929	4	Deleterious	0.398264	Disease	3	Benign	0.994	0	Neutral	0	Deleterious	0.61
5	114879096	G	A	17.26	0.52	0.80401	0.685571	0.993674	3	Deleterious	0.135942	Neutral	2	Benign	0.984	0.04	Neutral	4	Neutral	0.65
10	50531107	C	T	0.002	0.12	0.03332	0.547309	0.633249	1	Deleterious	0.732074	Neutral	9	Benign	0.762	1	Neutral	5	Neutral	0.75
13	100622484	G	C	20.6	0.53	0.95467	0.600757	0.996896	2	Deleterious	0.869112	Neutral	6	Benign	0.196	0	Neutral	7	Neutral	0.75
20	23066072	G	A	11.75	0.34	0.21107	0.547309	0.98391	2	Neutral	0.0718475	Neutral	4	Benign	0.84	0.11	Neutral	0	Neutral	0.65
10	91198523	G	A	25.4	0.69	0.99852	0.618467	0.998563	2	Deleterious	0.505223	Disease	2	Benign	1	0	Neutral	2	Deleterious	0.51
1	26751942	G	A	28.2	0.55	0.98075	0.698795	0.995387	3	Neutral	0.00733702	Neutral	2	Possibly damaging	0.812	0.03	Non-neutral	0	Deleterious	0.72
19	18001745	G	A	4.228	0.16	0.00606	0.658983	0.942574	2	Deleterious	0.355096	Neutral	7	Benign	0.944	0.76	Neutral	7	Neutral	0.74
16	10274037	C	T	24.9	0.46	0.93622	0.61531	0.998547	4	Deleterious	0.982626	Neutral	8	Benign	1	0.7	Neutral	3	Neutral	0.75
6	158549197	G	A	34	0.6	0.9541	0.709663	0.999162	2	Deleterious	0.126721	Disease	5	Benign	1	0	Non-neutral	3	Deleterious	0.76
15	29406136	C	T	18.66	0.23	0.81833	0.723109	0.999251	3	Neutral	0.000104692	Disease	6	Benign	1	0	Non-neutral	3	Deleterious	0.87
13	21086598	C	T	23.5	0.27	0.89868	0.584781	0.988973	2	Deleterious	0.132483	Disease	1	Benign	1	0.02	Neutral	2	Neutral	0.6
1	32672904	G	A	0.228	0.34	0.01137	0.696353	0.782105	2	Deleterious	0.272297	Neutral	9	Benign	0.198	0.3	Neutral	7	Neutral	0.83
14	20502451	G	A	5.327	0.31	0.02136	0.573888	0.99391	2	Neutral	0.00181743	Disease	2	Possibly damaging	0.82	0	Non-neutral	1	Deleterious	0.87
6	136582572	C	T	33	0.59	0.97628	0.702456	0.997963	3	Neutral	2.76165e-06	Neutral	2	Possibly damaging	0.972	0	Non-neutral	3	Deleterious	0.76
8	145058986	A	G	0.001	0.33	0.0013	0.645312	0.250452	1	Deleterious	0.151549	Neutral	2	Benign	1	0	Neutral	6	Neutral	0.63
10	27692272	C	T	16.87	0.14	0.34599	0.573888	0.995918	1	Deleterious	0.893874	Neutral	4	Benign	0.944	0.01	Non-neutral	0	Neutral	0.6
4	141321703	C	T	22.9	0.31	0.97983	0.060301	0.997235	2	Deleterious	0.969937	Neutral	5	Benign	0.348	0.96	Neutral	6	Neutral	0.83
2	20173401	C	T	24.1	0.53	0.99008	0.743671	0.99892	3	Neutral	0.00952497	Disease	6	Benign	0.964	0	Non-neutral	1	Deleterious	0.87
19	36042392	G	C	15.82	0.5	0.95539	0.696353	0.993536	3	Deleterious	0.527987	Disease	1	Possibly damaging	0.82	0.1	Non-neutral	2	Deleterious	0.55
17	56440713	C	T	18.21	0.49	0.9869	0.658983	0.999385	3	Neutral	0.0458846	Disease	3	Benign	0.206	0	Neutral	2	Neutral	0.6
4	7056395	C	T	19.82	0.49	0.8544	0.709663	0.999019	1	Neutral	0.0293399	Disease	2	Benign	0.998	0	Neutral	0	Deleterious	0.76
1	226026406	A	G	7.655	0.18	0.04124	0.643519	0.486188	2	Deleterious	0.462842	Neutral	7	Benign	1	0.57	Neutral	3	Neutral	0.75
1	160054220	G	A	22.4	0.63	0.94488	0.606814	0.999263	3	Deleterious	0.244113	Neutral	1	Possibly damaging	0.984	0.03	Neutral	1	Neutral	0.6
12	113745553	G	A	19.48	0.77	0.80568	0.616094	0.996687	2	Neutral	0.025192	Neutral	0	Possibly damaging	0.072	0.04	Non-neutral	1	Deleterious	0.61
20	62421572	G	A	25.5	0.49	0.98458	0.743671	0.997822	3	Deleterious	0.477748	Neutral	4	Benign	0.966	0	Non-neutral	2	Deleterious	0.51
13	46287374	G	A	3.293	0.14	0.00712	0.547309	0.981294	1	Deleterious	0.174656	Neutral	8	Benign	0.336	0.04	Neutral	0	Neutral	0.74
13	38156508	G	A	29.8	0.5	0.99018	0.618467	0.999443	3	Deleterious	0.475837	Disease	6	Benign	1	0	Non-neutral	4	Deleterious	0.76
22	22842418	A	G	26.5	0.4	0.98494	0.608884	0.997223	4	Neutral	0.00345965	Disease	2	Possibly damaging	0.988	0.05	Neutral	1	Deleterious	0.61
6	84270636	G	A	25.8	0.51	0.97294	0.602189	0.999115	2	Neutral	0.0271528	Neutral	5	Possibly damaging	0.986	0	Non-neutral	0	Deleterious	0.65
7	44193002	G	A	28.2	0.15	0.83471	0.602189	0.999104	1	Neutral	0.0529239	Disease	6	Benign	1	0	Neutral	0	Deleterious	0.76
17	59483185	G	A	22.6	0.53	0.98336	0.616487	0.992995	3	Deleterious	0.988529	Neutral	3	Benign	0.35	0.32	Neutral	0	Neutral	0.83
1	20827446	G	A	22.8	0.330501	0.58001	0.724815	0.982434	2	Deleterious	0.273525	Neutral	8	Possibly damaging	0.956	0.13	Neutral	0	Neutral	0.63
9	85627408	G	A	23.6	0.25	0.63471	0.602189	0.988178	2	Deleterious	0.373101	Neutral	9	Benign	0.998	0.06	Neutral	4	Neutral	0.75
1	47512182	G	A	25.6	0.53	0.98987	0.653264	0.999154	3	Neutral	4.26149e-05	Disease	3	Benign	0.998	0.9	Non-neutral	4	Deleterious	0.65
4	109675807	C	T	24	0.55	0.93467	0.658983	0.996975	2	Neutral	0.000248923	Disease	5	Benign	0.928	0.08	Neutral	0	Deleterious	0.61
16	67679931	C	T	16.52	0.31	0.63014	0	0.997949	2	Neutral	0.0326957	Neutral	3	Benign	1	0.02	Neutral	3	Deleterious	0.61
1	24989244	C	T	22.6	0.67	0.96584	0.702456	0.996705	4	Deleterious	0.242052	Neutral	7	Benign	0.978	0.01	Neutral	0	Neutral	0.6
11	55371071	G	A	7.492	0.31	0.04558	0.573888	0.379159	2	Deleterious	0.361476	Neutral	7	Benign	0.992	0.17	Neutral	3	Neutral	0.74
2	220239708	T	A	27.6	0.39	0.99089	0.606735	0.997054	2	Neutral	0.00162008	Disease	7	Possibly damaging	0.998	0	Non-neutral	2	Deleterious	0.87
9	131588677	T	A	22.5	0.4	0.98976	0.702456	0.994371	2	Neutral	0.0125853	Disease	1	Benign	0.932	0	Non-neutral	0	Deleterious	0.87
2	102849462	C	T	16.83	0.4	0.04479	0.547309	0.890479	3	Deleterious	0.104067	Neutral	6	Benign	0.242	0.56	Neutral	1	Neutral	0.83
4	164272437	G	C	23.5	0.33	0.98347	0.573888	0.996035	3	Deleterious	0.988772	Neutral	5	Possibly damaging	0.91	0.25	Non-neutral	0	Neutral	0.6
2	171863068	G	A	23.9	0.75	0.81973	0.732669	0.996751	3	Deleterious	0.155188	Disease	5	Benign	0.972	0	Non-neutral	0	Deleterious	0.72
3	50513589	C	T	23.6	0.3	0.75278	0.709663	0.994399	3	Deleterious	0.6545	Neutral	8	Benign	0.524	0.63	Neutral	1	Neutral	0.75
1	228033282	G	A	12.21	0.21	0.4598	0.573888	0.996196	2	Neutral	0.0104099	Disease	5	Benign	0.998	0	Non-neutral	5	Deleterious	0.87
3	20136781	G	A	24.2	0.46	0.93817	0.573888	0.998234	4	Deleterious	0.437921	Neutral	4	Benign	0.688	0.03	Neutral	0	Neutral	0.6
2	80529936	C	T	22.4	0.25	0.96045	0.64067	0.998135	2	Deleterious	0.994492	Neutral	7	Benign	0.996	0	Neutral	6	Neutral	0.63
22	39122390	G	A	22.6	0.48	0.98018	0.723133	0.999513	4	Deleterious	0.971882	Neutral	6	Benign	0.984	0.02	Neutral	2	Neutral	0.65
7	123256301	G	A	21.8	0.27	0.88849	0.547309	0.9333	2	Deleterious	0.946721	Neutral	3	Benign	0.986	0.71	Neutral	6	Neutral	0.74
3	52550236	G	A	34	0.62	0.99603	0.578056	0.999175	3	Neutral	0.0130092	Disease	4	Possibly damaging	0.998	0	Non-neutral	0	Deleterious	0.87
22	25152610	A	G	0.001	0.36	0.00799	0.547309	0.29134	2	Deleterious	0.301903	Disease	4	Benign	0.816	0.2	Neutral	1	Neutral	0.63
1	220307838	G	T	9.885	0.39	0.11249	0.743671	0.75315	2	Deleterious	0.831077	Neutral	2	Benign	1	0.26	Neutral	6	Neutral	0.75
12	50050199	G	T	23.7	0.71	0.95436	0.743671	0.997274	3	Neutral	0.0824279	Neutral	5	Benign	0.328	0.01	Neutral	0	Neutral	0.65
1	23689118	C	T	16.09	0.41	0.00211	0.590023	0.928927	4	Deleterious	0.776258	Neutral	7	Benign	0.948	1	Neutral	5	Neutral	0.74
17	45916906	G	A	5.7	0.37	0.13264	0.732433	0.740649	2	Deleterious	0.888415	Neutral	8	Benign	0.976	0.74	Neutral	6	Neutral	0.74
2	219209619	C	T	15.55	0.21	0.17044	0.645312	0.954118	3	Deleterious	0.570882	Neutral	8	Benign	0.5	0.17	Neutral	5	Neutral	0.75
16	53272403	C	T	27.4	0.53	0.97747	0.724815	0.999415	3	Neutral	0.0706423	Neutral	6	Benign	0.092	0	Non-neutral	2	Neutral	0.6
8	144671980	G	A	12.06	0.47	0.9876	0.702456	0.996862	4	Neutral	0.000130711	Neutral	8	Benign	1	0	Neutral	0	Deleterious	0.61
5	140052407	G	A	17.11	0.42	0.99626	0.768056	0.998878	3	Neutral	3.1559e-05	Disease	8	Benign	1	0	Neutral	2	Deleterious	0.76
1	86959173	T	C	0.015	0.12	0.00156	0.547309	0.19781	2	Deleterious	0.76542	Neutral	8	Benign	1	0.94	Neutral	5	Neutral	0.75
4	155488849	C	T	35	0.49	0.97568	0.573888	0.999226	3	Neutral	0.0745502	Disease	3	Benign	1	0	Neutral	2	Deleterious	0.76
6	84311154	G	T	23.6	0.69	0.84922	0.615948	0.981249	2	Deleterious	0.145425	Neutral	8	Possibly damaging	0.926	1	Non-neutral	1	Neutral	0.6
17	27371908	A	T	28.7	0.45	0.97351	0.743671	0.976739	3	Deleterious	0.128566	Disease	7	Possibly damaging	0.994	0.11	Neutral	3	Deleterious	0.51
3	45942794	A	G	10.68	0.51	0.06526	0.408882	0.717852	2	Deleterious	0.918243	Neutral	9	Benign	1	1	Neutral	5	Neutral	0.75
11	16010675	G	A	18.15	0.63	0.86549	0.606814	0.999406	3	Deleterious	0.608585	Disease	1	Benign	1	0	Non-neutral	1	Deleterious	0.72
2	77745947	C	A	32	0.49	0.97784	0.608884	0.992876	2	Deleterious	0.569157	Disease	2	Benign	0.614	0	Neutral	7	Neutral	0.6
2	220082424	G	A	16.61	0.48	0.84049	0.685571	0.784937	2	Deleterious	0.135605	Neutral	7	Benign	0.998	0.15	Non-neutral	0	Neutral	0.63
20	44506890	T	G	17	0.3	0.1821	0.608884	0.993799	3	Neutral	0.00171387	Neutral	7	Possibly damaging	0.998	0.01	Neutral	0	Deleterious	0.61
2	209104618	C	G	32	0.47	0.97436	0.702456	0.997561	2	Neutral	0.0876445	Disease	8	Benign	0.992	0	Non-neutral	2	Deleterious	0.87
20	48253947	G	A	33	0.65	0.99531	0.724815	0.998659	3	Deleterious	0.19519	Disease	5	Possibly damaging	1	0	Neutral	0	Deleterious	0.61
17	37863270	G	A	18.71	0.34	0.08768	0.698795	0.986398	3	Deleterious	0.692673	Neutral	4	Benign	1	0.24	Neutral	3	Neutral	0.75
8	22862018	C	T	22.6	0.51	0.89991	0.635938	0.999396	4	Neutral	0.00012461	Disease	9	Benign	1	0	Neutral	0	Deleterious	0.79
22	16287627	C	T	19.51	0.28	0.0042	0.573888	0.96552	1	Deleterious	0.940371	Neutral	8	Benign	0.726	0.05	Neutral	0	Neutral	0.74
5	168175347	G	A	16.62	0.32	0.24814	0.505578	0.999206	3	Deleterious	0.561649	Disease	1	Benign	0.962	0	Non-neutral	2	Deleterious	0.72
1	78470832	A	G	22.2	0.45	0.33571	0.731467	0.900191	4	Deleterious	0.995338	Neutral	2	Benign	0.918	1	Neutral	7	Neutral	0.74
17	39659272	G	A	21.5	0.33	0.40116	0.547309	0.998994	3	Neutral	0.0205969	Neutral	0	Benign	0.66	0	Neutral	0	Deleterious	0.61
11	66456618	G	A	34	0.25668	0.96127	0.702456	0.999301	3	Neutral	0.0270579	Disease	6	Benign	1	0	Non-neutral	2	Deleterious	0.87
5	74646165	C	T	22	0.52	0.99502	0.702456	0.999135	4	Neutral	0.078441	Neutral	3	Benign	1	0	Neutral	4	Deleterious	0.51
9	97062172	C	T	0.048	0.32	0.01046	0.65145	0.112524	2	Deleterious	0.211664	Neutral	8	Benign	0.972	0.9	Neutral	6	Neutral	0.74
18	45567349	C	G	26.7	0.42	0.95318	0.602189	0.997839	2	Deleterious	0.994742	Neutral	2	Possibly damaging	0.996	0	Neutral	0	Deleterious	0.51
16	77918591	C	G	25.4	0.26	0.94491	0.643519	0.998503	3	Deleterious	0.983819	Neutral	2	Benign	0.46	0.04	Neutral	3	Neutral	0.74
19	46174566	G	A	22.8	0.42	0.97817	0	0.998882	3	Neutral	0.00802412	Disease	7	Benign	0.978	0.03	Non-neutral	4	Deleterious	0.87
19	6374492	T	C	20.9	0.3	0.91745	0.658105	0.996833	3	Neutral	0.000169708	Neutral	2	Benign	1	0	Non-neutral	0	Deleterious	0.76
7	100841484	G	A	21.8	0.34	0.96473	0.576033	0.999325	2	Neutral	2.51464e-06	Disease	8	Benign	1	0	Non-neutral	2	Deleterious	0.87
17	10438444	C	T	22.2	0.186331	0.98199	0.653264	0.999378	3	Deleterious	0.151062	Disease	9	Benign	1	0	Non-neutral	0	Deleterious	0.76
16	23080308	G	A	21	0.43	0.96439	0.608884	0.999207	3	Deleterious	0.102152	Neutral	6	Benign	1	0	Non-neutral	0	Deleterious	0.61
11	73915487	C	A	23.5	0.79	0.8849	0.724815	0.995187	2	Deleterious	0.862461	Neutral	4	Benign	0.01	0.19	Neutral	7	Neutral	0.83
1	213068595	C	T	7.244	0.27	0.0187	0.702456	0.951491	1	Deleterious	0.668063	Neutral	8	Benign	0.516	0.08	Neutral	1	Neutral	0.74
4	102951398	G	A	18.33	0.18	0.82376	0.618467	0.998952	2	Deleterious	0.258762	Neutral	3	Benign	0.836	0.1	Non-neutral	1	Neutral	0.63
14	32562460	C	T	34	0.54	0.98868	0.743671	0.999137	4	Deleterious	0.327757	Disease	6	Benign	1	0	Non-neutral	1	Deleterious	0.72
21	41142948	C	T	0.162	0.16	0.06884	0.653264	0.813216	2	Neutral	0.0168531	Neutral	2	Benign	0.846	0.08	Neutral	3	Neutral	0.63
11	18735519	C	T	6.891	0.09	0.01678	0.577349	0.866472	1	Deleterious	0.289911	Disease	1	Benign	0.972	0	Non-neutral	1	Deleterious	0.61
11	103908557	G	A	12.06	0.13	0.55419	0.573888	0.990558	1	Neutral	0.0149913	Neutral	6	Benign	0.998	0	Neutral	2	Deleterious	0.61
9	32632418	C	T	19.79	0.4	0.55053	0.709663	0.998917	1	Deleterious	0.807051	Neutral	1	Benign	0.462	0.01	Neutral	2	Neutral	0.74
9	5768995	G	C	21.3	0.46	0.99605	0.724815	0.998556	2	Deleterious	0.987061	Neutral	5	Possibly damaging	1	0	Neutral	2	Deleterious	0.51
6	147062390	C	T	17.32	0.42	0.48876	0.573888	0.993224	1	Deleterious	0.597376	Neutral	7	Benign	0.092	0.1	Neutral	5	Neutral	0.83
11	46568722	T	G	24.8	0.54	0.98629	0.732669	0.984943	3	Deleterious	0.220432	Neutral	4	Benign	0.642	0.07	Neutral	3	Neutral	0.74
6	116263659	G	A	22.3	0.27	0.91747	0.573888	0.994814	4	Neutral	0.0332843	Neutral	4	Benign	0.982	0	Neutral	0	Deleterious	0.61
3	160952982	C	T	34	0.57	0.97448	0.65145	0.99897	4	Neutral	0.0192158	Disease	3	Benign	0.998	0.01	Non-neutral	0	Deleterious	0.87
19	15752394	C	T	6.717	0.24	0.08544	0.573888	0.939632	1	Deleterious	0.381742	Disease	3	Possibly damaging	0.678	0.07	Neutral	3	Neutral	0.6
4	100349108	C	T	25.8	0.31	0.99622	0.573888	0.996158	3	Deleterious	0.994773	Neutral	0	Benign	1	0	Non-neutral	2	Deleterious	0.61
11	60198338	C	T	20.5	0.19	0.67542	0.573888	0.97808	2	Deleterious	0.526748	Neutral	9	Benign	1	0.98	Neutral	2	Neutral	0.75
19	41497314	G	A	16.78	0.16	0.00977	0.547309	0.99472	1	Deleterious	0.89567	Disease	1	Benign	0.97	0	Neutral	3	Deleterious	0.61
1	192335244	C	T	29.2	0.55	0.99016	0.573888	0.946496	2	Deleterious	0.455647	Disease	2	Benign	0.996	0	Neutral	4	Deleterious	0.61
3	67054151	C	T	27.1	0.42	0.99723	0.724815	0.987321	2	Deleterious	0.566479	Neutral	6	Benign	0.546	0.05	Neutral	6	Neutral	0.74
6	24830895	A	T	27.4	0.22	0.99591	0.658983	0.967401	2	Neutral	1.81679e-06	Neutral	0	Benign	0.96	0	Non-neutral	3	Deleterious	0.79
19	44778780	G	A	14.38	0.23	0.20894	0.670488	0.992976	1	Neutral	0.000969772	Neutral	2	Benign	0.878	0.01	Neutral	1	Neutral	0.6
10	38344413	C	T	23.9	0.44	0.01294	0.743671	0.997467	1	Neutral	0.0140201	Neutral	5	Benign	0.744	0.03	Non-neutral	3	Deleterious	0.55
8	117875375	G	A	35	0.29	0.97696	0.732669	0.999308	4	Neutral	0.0345442	Disease	8	Possibly damaging	1	0	Non-neutral	1	Deleterious	0.87
8	133883670	C	T	26.7	0.25	0.9654	0.573888	0.999182	2	Deleterious	0.218042	Neutral	6	Benign	1	0	Non-neutral	2	Deleterious	0.61
5	112478988	G	A	34	0.559717	0.96095	0.709663	0.999443	4	Neutral	0.0249979	Disease	2	Benign	1	0	Non-neutral	1	Deleterious	0.87
20	16488710	C	T	22.2	0.61	0.95989	0.65145	0.379186	3	Deleterious	0.998559	Neutral	4	Benign	0.998	1	Neutral	3	Neutral	0.75
15	90213325	C	T	21	0.29	0.14142	0.576033	0.998837	2	Deleterious	0.329535	Neutral	3	Benign	0.236	0.07	Neutral	4	Neutral	0.83
1	89521841	G	C	6.888	0.25	0.06775	0.573888	0.982563	1	Deleterious	0.257724	Neutral	1	Benign	0.238	0.04	Neutral	4	Neutral	0.74
19	49253511	G	A	13.16	0.31	0.95139	0.724815	0.998699	3	Neutral	0.00559464	Disease	4	Possibly damaging	1	0	Non-neutral	0	Deleterious	0.87
14	105615648	C	T	12.85	0.47	0.28875	0.645312	0.984544	2	Deleterious	0.985916	Neutral	2	Benign	0.842	0.21	Neutral	3	Neutral	0.74
11	15098849	G	C	29.2	0.27	0.97192	0.584781	0.985166	3	Neutral	0.0265563	Disease	0	Benign	1	0	Non-neutral	5	Deleterious	0.87
11	67274907	A	T	22.3	0.55	0.94848	0.52208	0.964444	2	Neutral	0.000373213	Disease	7	Benign	1	0	Non-neutral	2	Deleterious	0.87
14	67147861	G	A	27.4	0.46	0.97031	0.709663	0.998754	3	Deleterious	0.893292	Neutral	4	Benign	0.016	0.02	Non-neutral	2	Neutral	0.63
[truncated: 15,874 more rows]

## Sheet: test_missense_neutral
Chromosome	Position	Reference allele	Observed allele	CADD score	GWAVA score	FATHMM score	FitCons score	DANN score	FunSeq2 score	MAPP prediction	MAPP score	PhD-SNP prediction	PhD-SNP reliability index	PolyPhen-1 prediction	PolyPhen-2 score	SIFT score	SNAP prediction	SNAP score	PredictSNP1 prediction	PredictSNP1 score
10	7765529	A	G	23.9	0.4	0.96181	0.573888	0.997282	4	Deleterious	0.0187642	Disease	8	Possibly damaging	1	0	Non-neutral	1	Deleterious	0.87
22	44495953	A	G	18	0.34	0.83092	0.644132	0.967723	3	Deleterious	0.0614518	Neutral	4	Benign	1	0.16	Non-neutral	0	Neutral	0.6
5	121761192	C	A	2.173	0.37	0.05426	0.658983	0.813832	2	Neutral	0.999973	Neutral	9	Benign	1	1	Neutral	7	Neutral	0.75
1	202462266	G	A	33	0.62	0.97947	0.658983	0.999384	4	Neutral	0.980738	Neutral	2	Possibly damaging	0.998	0	Non-neutral	2	Deleterious	0.61
12	108954894	C	G	16.62	0.49	0.36407	0.52208	0.981639	4	Neutral	0.958654	Neutral	8	Possibly damaging	0.75	0.02	Neutral	2	Neutral	0.61
17	74383509	G	A	8.644	0.19	0.26493	0.673471	0.960552	3	Neutral	0.999937	Neutral	7	Benign	0.998	0.55	Neutral	1	Neutral	0.75
3	48658925	G	A	3.794	0.13	0.02049	0.536957	0.86527	1	Deleterious	0.0224463	Neutral	2	Benign	0.978	0.12	Non-neutral	0	Neutral	0.6
3	10261445	C	G	8.853	0.24	0.30801	0.675528	0.989683	2	Deleterious	0.0409574	Neutral	7	Benign	0.878	0.17	Neutral	7	Neutral	0.71
20	18295869	G	A	1.95	0.23	0.08193	0.786243	0.39149	3	Neutral	0.293278	Neutral	7	Benign	0.98	1	Neutral	3	Neutral	0.74
8	134024278	C	T	0.004	0.29	0.00803	0.547309	0.736998	1	Neutral	0.7681	Neutral	9	Benign	0.966	0.05	Neutral	3	Neutral	0.74
16	56906338	G	A	14.68	0.34	0.39089	0.547309	0.986521	2	Neutral	0.487311	Neutral	6	Benign	0.998	0.27	Neutral	0	Neutral	0.75
5	149786874	C	T	16.31	0.44	0.53798	0.643519	0.998956	4	Deleterious	2.87913e-07	Disease	3	Benign	1	0.19	Non-neutral	2	Deleterious	0.61
1	248366370	A	G	8.167	0.36	0.13609	0.573888	0.639324	2	Neutral	0.141074	Disease	4	Benign	0.736	0.03	Neutral	3	Neutral	0.6
5	59064187	A	G	19.31	0.53	0.34829	0.503968	0.915645	2	Neutral	0.242389	Neutral	8	Benign	1	0.54	Neutral	2	Neutral	0.75
12	40013392	G	C	16.48	0.55	0.92928	0.606814	0.994433	3	Neutral	0.639502	Neutral	7	Benign	0.908	0.06	Neutral	6	Neutral	0.74
2	62449581	A	G	12.44	0.47	0.17923	0.724815	0.917924	3	Neutral	0.78927	Neutral	8	Benign	1	0.67	Neutral	6	Neutral	0.75
16	90030970	G	A	20.8	0.28	0.96958	0.723109	0.998334	2	Neutral	0.202326	Disease	1	Benign	0.998	0.18	Neutral	4	Neutral	0.63
3	122446776	G	A	1.579	0.32	0.0545	0.709663	0.574173	1	Neutral	0.386956	Neutral	8	Benign	0.586	0.74	Neutral	5	Neutral	0.75
8	80965596	G	A	24.7	0.59	0.87001	0.709663	0.993447	2	Deleterious	0.00219624	Disease	6	Possibly damaging	0.298	0.01	Neutral	0	Deleterious	0.61
9	33256825	T	C	27.8	0.67	0.94194	0.724815	0.999021	4	Deleterious	0.00408626	Neutral	2	Benign	0.998	0	Non-neutral	1	Deleterious	0.61
7	44555699	A	T	17.98	0.38	0.70814	0.573888	0.972537	2	Neutral	0.986543	Neutral	3	Benign	0.986	0.21	Neutral	5	Neutral	0.74
8	42939989	G	A	22.8	0.74	0.88974	0.743671	0.996735	3	Neutral	0.988492	Neutral	9	Benign	0.942	0.14	Neutral	5	Neutral	0.74
2	108910751	G	A	22.6	0.47	0.72092	0.608524	0.999239	3	Neutral	0.850771	Neutral	3	Benign	0.982	0.04	Neutral	5	Neutral	0.65
17	72860371	G	A	16.48	0.47	0.86691	0.570548	0.99914	2	Deleterious	0.0410379	Disease	4	Benign	1	0	Neutral	0	Deleterious	0.76
19	45161134	A	G	12.03	0.4	0.88121	0.702456	0.97978	2	Deleterious	0.000780738	Disease	9	Possibly damaging	0.748	0.06	Non-neutral	1	Deleterious	0.72
19	58291082	T	C	0.003	0.36	0.00612	0.608884	0.432624	1	Neutral	0.506643	Neutral	1	Benign	0.976	0.29	Neutral	5	Neutral	0.74
19	18234789	C	T	14.92	0.15	0.20358	0.645312	0.99662	2	Neutral	0.594742	Neutral	6	Benign	0.026	0.03	Neutral	1	Neutral	0.63
12	94244001	G	A	0.614	0.29	0.01277	0.608524	0.318008	1	Neutral	0.994081	Neutral	10	Benign	1	1	Neutral	5	Neutral	0.75
11	48149491	G	A	0.002	0.26	0.00536	0.724815	0.801571	2	Neutral	0.948918	Neutral	6	Benign	0.312	0.46	Neutral	6	Neutral	0.83
1	248224455	C	T	5.173	0.19	0.01479	0.573888	0.987141	2	Neutral	0.389499	Disease	3	Benign	0.864	0.14	Neutral	0	Neutral	0.65
9	13186355	T	C	22.7	0.54	0.94597	0.709663	0.996134	3	Neutral	0.45535	Neutral	9	Benign	0.822	0.26	Neutral	0	Neutral	0.74
6	28359078	T	C	26.1	0.32	0.53113	0.724815	0.997935	3	Neutral	0.344136	Neutral	3	Benign	1	0.04	Non-neutral	3	Deleterious	0.61
15	63092900	G	C	26.8	0.5	0.99191	0.709663	0.998404	3	Neutral	0.991551	Neutral	0	Benign	1	0	Neutral	3	Deleterious	0.51
7	105672877	G	T	21.9	0.37	0.91129	0.527494	0.995966	2	Deleterious	0.0234316	Neutral	1	Possibly damaging	0.966	0	Non-neutral	1	Deleterious	0.76
3	20225429	C	A	16.42	0.36	0.66686	0.743671	0.953459	2	Neutral	0.108903	Neutral	5	Benign	0.832	0.15	Neutral	3	Neutral	0.74
19	56206137	G	C	20.4	0.51	0.8954	0.723109	0.994799	3	Neutral	0.140144	Neutral	9	Benign	0.864	0.02	Neutral	6	Neutral	0.71
6	116879222	C	T	13.09	0.49	0.77974	0.547309	0.998861	3	Deleterious	0.00272422	Neutral	3	Benign	1	0.01	Non-neutral	0	Deleterious	0.76
2	29448419	G	A	16.7	0.19	0.82696	0.608075	0.803029	4	Neutral	0.312696	Neutral	7	Benign	0.942	0.4	Neutral	2	Neutral	0.74
18	25593750	T	C	14.98	0.38	0.7834	0.709663	0.71983	4	Neutral	0.901397	Neutral	7	Benign	1	0.2	Neutral	5	Neutral	0.75
1	207649609	C	T	0.532	0.36	0.00036	0.653264	0.0566274	3	Neutral	0.884445	Neutral	7	Benign	0.994	1	Neutral	6	Neutral	0.74
21	45750145	T	C	9.682	0.36	0.86816	0.643519	0.874271	2	Neutral	0.729465	Neutral	9	Benign	0.98	0.58	Neutral	4	Neutral	0.74
22	21407656	T	C	14.69	0.46	0.70142	0.547309	0.966392	2	Neutral	0.838816	Neutral	3	Benign	0.918	0.39	Neutral	7	Neutral	0.74
11	87020661	A	G	26	0.54	0.97143	0.658983	0.99871	2	Neutral	0.195519	Disease	1	Benign	0.98	0.01	Neutral	1	Neutral	0.6
22	46731671	T	G	9.961	0.48	0.00191	0.52208	0.625802	2	Deleterious	0.0359236	Neutral	9	Benign	1	0.34	Neutral	5	Neutral	0.63
11	74717217	A	C	2.552	0.45	0.11115	0.743671	0.788075	1	Deleterious	0.0734309	Neutral	7	Benign	0.998	0.28	Neutral	0	Neutral	0.65
1	201780786	T	C	15.25	0.42	0.08477	0.702456	0.850443	2	Neutral	0.450344	Neutral	7	Benign	1	0.22	Neutral	8	Neutral	0.75
6	143749615	T	A	2.103	0.46	0.03533	0.743671	0.935127	1	Neutral	0.581213	Neutral	9	Benign	0.998	0.2	Neutral	6	Neutral	0.74
8	48877227	T	C	22.3	0.69	0.93822	0.702456	0.996415	4	Neutral	0.686425	Neutral	4	Benign	0.434	0	Neutral	1	Neutral	0.75
11	82550340	G	T	13.54	0.43	0.9815	0.709663	0.739267	3	Neutral	0.125098	Neutral	3	Benign	0.558	0.13	Neutral	0	Neutral	0.74
2	135744373	G	A	23	0.62	0.92047	0.573888	0.998649	2	Deleterious	0.0174789	Neutral	3	Possibly damaging	0.998	0.01	Non-neutral	0	Deleterious	0.72
4	183601819	G	C	24.7	0.28	0.98841	0.743671	0.996705	2	Neutral	0.173428	Neutral	2	Benign	0.724	0.19	Non-neutral	0	Neutral	0.65
17	74039945	T	C	8.247	0.21	0.71323	0.724815	0.926824	3	Neutral	0.224549	Neutral	7	Benign	0.964	0.63	Neutral	6	Neutral	0.74
10	7774364	A	G	16.47	0.26	0.90711	0.573888	0.726336	4	Neutral	0.711954	Neutral	9	Benign	0.008	1	Neutral	5	Neutral	0.83
10	115609365	G	T	7.392	0.49	0.20699	0.658983	0.951179	4	Neutral	0.988878	Neutral	6	Possibly damaging	0.638	0.14	Neutral	5	Neutral	0.68
14	74976452	C	T	26.4	0.35	0.9588	0.59043	0.997887	4	Neutral	0.952375	Disease	4	Benign	0.286	0.05	Neutral	3	Neutral	0.75
2	113999621	C	T	16.97	0.42	0.50624	0.576033	0.957441	2	Neutral	0.600944	Neutral	7	Benign	0.918	0.52	Neutral	6	Neutral	0.74
10	88259940	G	A	29.6	0.58	0.98076	0.724815	0.999181	3	Neutral	0.254643	Disease	5	Benign	0.998	0	Non-neutral	1	Deleterious	0.72
5	154278839	G	A	34	0.62	0.97899	0.724815	0.999194	3	Neutral	0.581497	Neutral	9	Benign	0.998	0.01	Non-neutral	0	Deleterious	0.52
2	48941162	G	T	19.5	0.26	0.96227	0.547309	0.973957	3	Neutral	0.393073	Neutral	5	Benign	0.436	0.15	Neutral	6	Neutral	0.83
8	125603467	C	T	22.6	0.57	0.96237	0.658983	0.640331	3	Neutral	1	Neutral	5	Benign	0.976	0.78	Neutral	1	Neutral	0.74
17	80049154	C	A	7.713	0.4	0.21251	0.697927	0.725448	3	Neutral	0.252291	Disease	2	Benign	1	0.44	Neutral	4	Neutral	0.63
20	31368253	C	T	22.7	0.21	0.04666	0.698795	0.99006	3	Neutral	0.177709	Neutral	9	Benign	1	0.24	Neutral	4	Neutral	0.75
17	57941166	G	A	22.7	0.71	0.98642	0.743671	0.809429	4	Deleterious	0.0397147	Neutral	0	Benign	0.666	0.03	Neutral	1	Deleterious	0.61
17	46685293	G	A	22.2	0.29	0.9291	0.596491	0.999059	4	Deleterious	1.81252e-06	Disease	5	Benign	1	0	Non-neutral	6	Deleterious	0.87
10	134161560	C	T	0.001	0.36	0.0016	0.645312	0.713118	2	Neutral	0.849407	Neutral	9	Benign	0.77	0.6	Neutral	6	Neutral	0.75
2	160604768	G	A	6.586	0.31	0.54381	0.702456	0.887945	2	Neutral	0.703131	Neutral	7	Benign	1	0.57	Neutral	5	Neutral	0.75
9	34241681	C	T	33	0.73	0.91055	0.724815	0.998798	3	Deleterious	0.0429923	Neutral	7	Benign	0.974	0.02	Non-neutral	4	Deleterious	0.65
6	43013797	G	C	16.6	0.39	0.99385	0.702456	0.991883	2	Deleterious	0.0656045	Disease	6	Benign	0.988	0	Non-neutral	1	Deleterious	0.87
11	51515834	C	A	22.8	0.28	0.38577	0.573888	0.99347	1	Deleterious	0.0520906	Neutral	0	Benign	0.99	0	Non-neutral	2	Deleterious	0.61
2	88888321	C	T	22.4	0.65	0.97811	0.724815	0.965483	3	Neutral	0.122316	Neutral	7	Benign	0.98	0.22	Neutral	5	Neutral	0.74
6	14131902	C	T	24.7	0.42	0.10963	0.709663	0.997384	3	Deleterious	0.00293372	Neutral	6	Possibly damaging	0.808	0	Non-neutral	1	Deleterious	0.65
17	10409346	T	C	18.69	0.44	0.96007	0.657636	0.998484	3	Deleterious	0.000174891	Disease	7	Benign	0.996	0	Non-neutral	1	Deleterious	0.87
2	15432775	C	T	24.9	0.61	0.95912	0.709663	0.999381	3	Neutral	0.729385	Neutral	1	Benign	0.996	0.11	Neutral	4	Neutral	0.63
14	70989947	T	C	6.256	0.29	0.10678	0.573888	0.871718	2	Neutral	0.251524	Neutral	7	Benign	0.906	0.57	Neutral	4	Neutral	0.74
21	32575261	A	T	16	0.35	0.46646	0.709663	0.932301	4	Neutral	0.196999	Neutral	1	Benign	0.658	0.09	Neutral	1	Neutral	0.74
15	55663993	T	C	22.1	0.5	0.95895	0.658983	0.998372	2	Deleterious	0.0169185	Disease	4	Benign	1	0	Non-neutral	4	Deleterious	0.87
4	15826583	C	T	24.7	0.4	0.43965	0.602189	0.996519	3	Deleterious	0.00136003	Neutral	0	Benign	1	0	Non-neutral	4	Deleterious	0.79
21	47918728	G	A	0.049	0.43	0.17798	0.608884	0.674659	1	Neutral	0.955805	Neutral	3	Benign	0.816	0.73	Neutral	0	Neutral	0.74
9	132400086	C	T	1.376	0.43	0.32903	0.697927	0.833609	3	Neutral	0.414992	Neutral	9	Benign	0.994	0.11	Non-neutral	0	Neutral	0.65
5	79739007	T	G	14.41	0.54	0.90369	0.709663	0.778514	3	Neutral	0.142691	Disease	1	Benign	0.98	0.06	Neutral	1	Neutral	0.63
19	52876464	A	G	23.4	0.31	0.54332	0.702456	0.998334	1	Deleterious	0.0220589	Disease	6	Benign	0.994	0	Non-neutral	1	Deleterious	0.87
8	11412353	C	G	17.8	0.49	0.12892	0.547309	0.997173	4	Neutral	0.397294	Disease	6	Benign	0.124	0	Non-neutral	0	Deleterious	0.51
17	26941173	C	T	19.27	0.58	0.51202	0.606735	0.967266	1	Neutral	0.531355	Neutral	8	Benign	0.996	0.11	Neutral	6	Neutral	0.74
1	170136672	G	A	22.9	0.33	0.8301	0.618467	0.996808	2	Neutral	0.849261	Neutral	7	Benign	0.966	0.41	Neutral	4	Neutral	0.74
17	17722768	C	T	21.1	0.72	0.99056	0.106797	0.973444	4	Neutral	0.989375	Neutral	3	Benign	0.988	0.01	Neutral	5	Neutral	0.65
2	214161989	C	A	8.634	0.28	0.77875	0.659464	0.994716	2	Neutral	0.320379	Neutral	6	Benign	0.99	0.22	Non-neutral	0	Neutral	0.65
9	33255901	T	C	17.09	0.38	0.91718	0.724815	0.994531	4	Neutral	0.549714	Neutral	7	Benign	0.994	0.11	Neutral	1	Neutral	0.75
8	42914288	A	G	14.05	0.4	0.94832	0.643519	0.929985	3	Neutral	0.791936	Neutral	3	Benign	0.992	0.11	Neutral	6	Neutral	0.75
12	99061322	A	G	21.3	0.6	0.98826	0.658983	0.996521	4	Neutral	0.477595	Neutral	6	Benign	0.964	0.17	Non-neutral	1	Neutral	0.63
1	20998568	T	A	25.8	0.4	0.87722	0.709663	0.993964	2	Neutral	0.855017	Neutral	4	Possibly damaging	0.998	0	Non-neutral	0	Deleterious	0.61
21	45535239	G	A	29.5	0.27	0.96901	0.724815	0.99926	4	Neutral	0.999051	Neutral	2	Benign	1	0.07	Neutral	4	Neutral	0.75
17	18194242	C	T	26	0.53	0.97946	0.697927	0.893206	4	Neutral	0.097024	Neutral	3	Benign	0.99	0.03	Neutral	0	Neutral	0.6
17	78210766	C	T	27.6	0.36	0.98498	0.723109	0.99918	3	Neutral	0.724043	Disease	1	Benign	0.988	0	Neutral	4	Neutral	0.6
2	69049956	G	A	0.023	0.24	0.00271	0.602189	0.638381	2	Neutral	0.768088	Neutral	9	Benign	0.998	0.35	Neutral	5	Neutral	0.74
14	53119875	C	T	23.2	0.55	0.94472	0.743671	0.996166	3	Neutral	0.732505	Disease	3	Benign	0.532	0.08	Neutral	5	Neutral	0.65
3	108698491	T	C	18.37	0.35	0.34128	0.573888	0.978636	2	Neutral	0.109089	Neutral	4	Possibly damaging	0.96	0.02	Neutral	2	Neutral	0.6
19	10577831	A	G	4.636	0.3	0.06571	0.570548	0.926372	2	Neutral	0.87968	Neutral	9	Benign	1	0.56	Neutral	3	Neutral	0.75
21	15954660	T	C	7.28	0.4	0.025	0.573888	0.561649	2	Deleterious	0.0413418	Neutral	9	Benign	1	1	Neutral	3	Neutral	0.63
17	72860653	G	A	20.9	0.48	0.76634	0.723109	0.996928	2	Deleterious	0.0693298	Neutral	2	Benign	0.97	0.02	Neutral	1	Neutral	0.6
16	27761090	G	T	22.4	0.38	0.37915	0.658983	0.974923	3	Neutral	0.122616	Neutral	9	Benign	0.966	0.01	Neutral	0	Neutral	0.6
11	124096122	G	A	5.348	0.36	0.01433	0.063197	0.719796	0.185214	Neutral	0.682952	Neutral	5	Benign	0.988	0.66	Neutral	5	Neutral	0.74
19	45873449	T	C	20.2	0.55	0.71394	0.600757	0.998118	4	Neutral	0.324555	Disease	5	Possibly damaging	0.962	0.11	Neutral	1	Neutral	0.6
14	56084714	A	G	0.002	0.54	0.18283	0.724815	0.291551	2	Neutral	0.154467	Neutral	7	Benign	0.998	0.84	Neutral	7	Neutral	0.74
16	27751669	C	A	23.7	0.55	0.64545	0.658983	0.993465	3	Neutral	0.0881262	Neutral	6	Benign	0.986	0	Non-neutral	2	Deleterious	0.72
6	56484432	C	T	13.18	0.55	0.10349	0.463624	0.96852	4	Neutral	0.325278	Neutral	9	Benign	1	0.07	Neutral	4	Neutral	0.75
2	220149437	C	G	19.32	0.63	0.40337	0.709663	0.929131	4	Deleterious	0.0310953	Neutral	9	Benign	0.994	0.1	Neutral	3	Neutral	0.65
15	40589742	C	T	22.6	0.17	0.99007	0.602189	0.999111	3	Neutral	0.695231	Neutral	7	Benign	0.568	0.29	Neutral	5	Neutral	0.75
14	20854320	C	T	22.2	0.47	0.35526	0.643519	0.970555	2	Neutral	0.536276	Neutral	8	Benign	0.432	0.21	Neutral	1	Neutral	0.83
5	96222360	T	C	17.11	0.35	0.22518	0.573888	0.830917	3	Neutral	0.277255	Neutral	1	Benign	0.998	0.26	Neutral	3	Neutral	0.75
19	44103010	G	A	19.74	0.41	0.45773	0.643519	0.999206	2	Neutral	0.249779	Neutral	8	Benign	0.978	0.07	Neutral	6	Neutral	0.74
1	153591448	T	G	19.03	0.38	0.08329	0.606735	0.926133	3	Neutral	0.641725	Neutral	9	Benign	1	0.19	Neutral	5	Neutral	0.75
6	116758282	G	A	15.17	0.41	0.70955	0.643519	0.653912	3	Neutral	0.995325	Neutral	9	Benign	0.996	0.38	Neutral	5	Neutral	0.74
17	60030333	G	A	14.84	0.57	0.88048	0.724815	0.814981	3	Deleterious	0.0226089	Neutral	5	Benign	0.888	0.29	Neutral	2	Neutral	0.65
10	85992138	G	A	24.5	0.25	0.23285	0.547309	0.998718	1	Neutral	0.091663	Neutral	4	Benign	1	0.02	Non-neutral	2	Deleterious	0.72
2	96993691	G	A	0.078	0.21	0.05215	0.743671	0.878283	2	Neutral	0.538789	Neutral	3	Benign	1	0.21	Neutral	5	Neutral	0.75
2	26798927	C	G	19.1	0.11	0.77535	0.602189	0.587	2	Deleterious	0.00242484	Neutral	5	Benign	0.784	0.02	Non-neutral	4	Deleterious	0.72
17	6901890	G	C	18.45	0.39	0.96235	0.577349	0.995655	3	Neutral	0.692552	Neutral	8	Benign	0.416	0.01	Neutral	4	Neutral	0.74
6	46660495	C	T	22.1	0.5	0.9513	0.547309	0.998967	3	Neutral	0.235853	Neutral	7	Benign	0.998	0.01	Non-neutral	0	Neutral	0.6
9	132483029	C	G	22.3	0.43	0.98248	0.854111	0.993604	3	Neutral	0.310196	Disease	3	Benign	0.998	0.01	Neutral	0	Deleterious	0.61
2	95541471	G	T	9.145	0.33	0.89218	0.547309	0.983255	2	Deleterious	9.98413e-05	Disease	10	Benign	1	0	Non-neutral	2	Deleterious	0.87
18	3879164	G	A	21.5	0.53	0.99466	0.709663	0.999192	3	Deleterious	0.0172772	Neutral	7	Possibly damaging	0.078	0.05	Neutral	1	Neutral	0.63
1	167905028	C	T	22.2	0.48	0.23076	0.52208	0.994524	2	Neutral	0.996751	Neutral	9	Benign	0.868	0.67	Neutral	7	Neutral	0.75
12	56351000	G	A	8.086	0.33	0.03183	0.702456	0.626189	1	Neutral	0.815946	Neutral	8	Benign	0.966	0.34	Neutral	5	Neutral	0.74
11	126162704	T	C	18.04	0.23	0.91019	0.489635	0.996418	3	Deleterious	2.25335e-06	Disease	1	Benign	1	0	Neutral	3	Deleterious	0.61
22	32651295	T	A	11.18	0.38	0.09554	0.547309	0.988249	3	Neutral	0.798316	Neutral	9	Benign	0.966	0.03	Neutral	1	Neutral	0.6
2	74600062	C	T	23.6	0.35	0.97294	0.658983	0.993121	4	Neutral	0.742068	Neutral	6	Possibly damaging	0.994	0.59	Non-neutral	2	Neutral	0.6
17	42882477	C	T	24.3	0.6	0.9946	0.702456	0.973246	3	Neutral	0.779941	Neutral	0	Benign	0.178	0.49	Neutral	5	Neutral	0.83
2	232389881	C	T	9.512	0.16	0.10351	0.576033	0.964391	2	Neutral	0.999318	Neutral	6	Benign	1	0.54	Neutral	4	Neutral	0.75
17	20135693	G	A	11.08	0.48	0.58695	0.702456	0.911065	2	Neutral	0.90762	Neutral	8	Benign	0.774	0.23	Neutral	4	Neutral	0.65
17	60768014	G	A	18.89	0.33	0.85853	0.709663	0.987887	2	Neutral	0.966749	Neutral	7	Benign	0.812	0.11	Neutral	1	Neutral	0.74
12	72278705	G	C	21.9	0.68	0.96252	0.724815	0.95725	3	Neutral	0.783931	Neutral	5	Benign	0.366	0.21	Neutral	1	Neutral	0.83
4	187084086	T	C	5.059	0.34	0.03613	0.658983	0.653765	2	Neutral	0.91988	Neutral	9	Benign	0.982	0.5	Neutral	5	Neutral	0.74
2	220082906	C	T	22.1	0.39	0.6159	0.52208	0.993334	3	Neutral	0.143893	Neutral	2	Benign	0.892	0.1	Neutral	5	Neutral	0.74
1	186276866	C	T	5.032	0.24	0.06466	0.547309	0.619718	1	Neutral	0.115994	Neutral	6	Benign	0.976	0.29	Neutral	0	Neutral	0.74
14	91691164	C	T	0.002	0.3	0.0089	0.709663	0.951512	1	Neutral	0.981082	Neutral	4	Benign	0.928	0.23	Neutral	6	Neutral	0.74
5	35962984	A	G	2.868	0.28	0.00022	0.618467	0.389246	2	Deleterious	0.000376315	Neutral	7	Possibly damaging	1	0.11	Non-neutral	0	Deleterious	0.61
14	24839281	C	A	22.9	0.16	0.83725	0.688494	0.983864	4	Neutral	0.654244	Neutral	6	Possibly damaging	0.856	0.21	Neutral	0	Neutral	0.65
7	37956053	G	C	21.6	0.3	0.92652	0.606814	0.993902	3	Neutral	0.198188	Neutral	2	Benign	0.824	0.1	Neutral	7	Neutral	0.74
19	47987230	C	T	22.9	0.53	0.50937	0.504199	0.998819	3	Neutral	0.917629	Neutral	9	Possibly damaging	1	0.09	Non-neutral	0	Neutral	0.6
1	54681831	G	C	26.1	0.27	0.94598	0.724815	0.998448	3	Deleterious	0.0187231	Neutral	4	Benign	1	0.01	Non-neutral	3	Deleterious	0.76
3	9517561	C	T	24.3	0.56	0.9317	0.697927	0.998556	3	Deleterious	0.0152053	Neutral	4	Benign	0.96	0.01	Non-neutral	0	Deleterious	0.72
5	79733253	G	A	10.47	0.54	0.00427	0.65145	0.0811167	3	Neutral	0.995842	Neutral	9	Possibly damaging	1	1	Neutral	6	Neutral	0.65
19	39880133	T	C	20.8	0.41	0.84442	0.702456	0.916901	4	Neutral	0.417831	Neutral	7	Benign	0.55	0.77	Neutral	5	Neutral	0.75
1	33292008	G	A	2.476	0.48	0.3044	0.724815	0.872977	2	Deleterious	0.0533916	Neutral	8	Benign	0.984	0.1	Non-neutral	0	Neutral	0.6
3	150128822	C	G	13.32	0.27	0.1349	0.768056	0.956044	2	Neutral	0.49554	Neutral	6	Benign	0.488	0.01	Neutral	4	Neutral	0.74
2	71212336	T	C	21.9	0.36	0.86959	0.769059	0.981495	2	Deleterious	0.000777322	Neutral	4	Benign	1	0	Non-neutral	4	Deleterious	0.76
9	125424842	T	C	13.25	0.21	0.24961	0.573888	0.5264	2	Deleterious	0.0183282	Neutral	5	Benign	0.982	0.03	Non-neutral	3	Deleterious	0.55
21	28214701	C	T	32	0.46	0.73832	0.685912	0.984667	3	Neutral	0.946794	Neutral	8	Benign	0.066	0.01	Neutral	4	Neutral	0.74
11	100999650	A	G	15.03	0.31	0.22135	0.606814	0.86856	3	Deleterious	0.00824618	Neutral	3	Benign	0.222	0.02	Neutral	3	Neutral	0.63
1	169953815	A	C	29.4	0.61	0.98243	0.653264	0.989163	4	Neutral	0.319805	Neutral	4	Benign	0.984	0	Neutral	1	Deleterious	0.51
12	2968060	G	A	14.13	0.46	0.82389	0.702456	0.995951	2	Neutral	0.280834	Neutral	8	Benign	0.946	0	Neutral	3	Neutral	0.63
12	66308644	A	G	0.236	0.22	0.00013	0.547309	0.114521	1	Neutral	0.99924	Neutral	3	Benign	0.994	1	Non-neutral	1	Neutral	0.65
22	46746188	C	T	21	0.55	0.91804	0.608884	0.965029	2	Neutral	0.144773	Neutral	6	Benign	0.998	0.26	Neutral	4	Neutral	0.75
20	23066596	C	G	7.618	0.26	0.59588	0.547309	0.971542	1	Neutral	0.814459	Neutral	7	Benign	0.018	0.01	Non-neutral	1	Neutral	0.6
8	30916679	G	A	10.46	0.52	0.07229	0.709663	0.153459	3	Neutral	0.939461	Neutral	9	Benign	1	1	Neutral	6	Neutral	0.75
2	48872230	C	T	20.2	0.52	0.85637	0.573888	0.998887	3	Neutral	0.908099	Neutral	5	Benign	0.05	0.07	Neutral	2	Neutral	0.83
2	111562875	C	T	11.13	0.38	0.46556	0.702456	0.993748	2	Neutral	0.125301	Disease	1	Benign	0.984	0.03	Neutral	1	Neutral	0.6
17	9804399	T	C	11.7	0.16	0.33678	0.547309	0.726401	3	Neutral	0.24979	Disease	1	Benign	1	0.01	Neutral	7	Neutral	0.6
4	8390998	C	G	9.917	0.24	0.02005	0.717052	0.806014	2	Neutral	0.302676	Disease	6	Benign	0.998	0.3	Neutral	6	Neutral	0.63
2	88882960	C	T	22.9	0.63	0.90945	0.743671	0.965846	3	Neutral	0.382325	Disease	3	Benign	0.29	0.59	Neutral	0	Neutral	0.75
2	219521110	C	T	14.05	0.47	0.02943	0.702456	0.998792	2	Neutral	0.0852797	Neutral	7	Benign	0.99	0.02	Non-neutral	4	Deleterious	0.65
10	23729194	G	T	8.177	0.31	0.17128	0.666236	0.953996	1	Neutral	0.70586	Neutral	8	Benign	0.038	0.33	Neutral	2	Neutral	0.83
11	67434161	A	G	0.001	0.15	0.00487	0.578056	0.113852	1	Neutral	0.667795	Neutral	6	Benign	1	1	Neutral	4	Neutral	0.75
11	113711399	T	C	6.682	0.34	0.78025	0.724815	0.831394	2	Neutral	0.94183	Neutral	3	Benign	0.992	0.59	Neutral	4	Neutral	0.74
17	80006958	T	C	8.637	0.18	0.09247	0.723109	0.813782	2	Neutral	0.882288	Neutral	9	Benign	0.996	0.66	Neutral	6	Neutral	0.74
15	42116076	G	T	6.327	0.62	0.85702	0.709663	0.984523	2	Deleterious	0.00208138	Neutral	5	Benign	0.96	0.02	Neutral	2	Deleterious	0.61
16	81213280	G	A	7.813	0.18	0.00413	0.616094	0.781869	1	Neutral	0.837727	Neutral	9	Benign	1	0.14	Neutral	6	Neutral	0.75
10	105139477	G	A	21.8	0.64	0.96506	0.709663	0.899816	4	Neutral	0.988863	Neutral	6	Benign	0.998	0.76	Neutral	6	Neutral	0.74
12	94072653	A	G	12.62	0.57	0.63301	0.658105	0.937185	1	Deleterious	0.0475392	Neutral	6	Benign	0.998	0.16	Neutral	1	Neutral	0.63
13	95858806	C	T	14.43	0.27	0.03482	0.709663	0.91646	2	Neutral	0.875671	Disease	1	Benign	0.968	0.33	Neutral	6	Neutral	0.65
18	77171480	T	C	8.033	0.19	0.98914	0.576033	0.484984	3	Neutral	0.133373	Disease	1	Benign	0.996	0.24	Neutral	6	Neutral	0.6
5	140070876	G	T	12.17	0.67	0.614	0.52208	0.711646	3	Neutral	0.308893	Neutral	2	Benign	0.362	0	Neutral	1	Neutral	0.75
14	105858969	G	A	22	0.5	0.66057	0.723109	0.998718	3	Neutral	0.443662	Neutral	8	Benign	0.218	0.48	Neutral	6	Neutral	0.83
10	106214272	C	A	1.908	0.2	0.07944	0.658983	0.719916	2	Neutral	0.98308	Neutral	7	Benign	1	0.18	Neutral	5	Neutral	0.75
2	10198997	G	C	21	0.4	0.90748	0.576033	0.996238	3	Deleterious	0.0598096	Neutral	3	Possibly damaging	1	0	Non-neutral	3	Deleterious	0.76
8	145113289	T	G	14.06	0.54	0.93525	0.295636	0.822056	2	Neutral	0.185346	Disease	5	Benign	0.992	0	Non-neutral	1	Deleterious	0.61
9	15187992	A	T	16.84	0.58	0.78161	0.658983	0.480212	2	Neutral	0.816824	Neutral	8	Benign	1	0.45	Neutral	5	Neutral	0.75
10	105800166	T	A	16.55	0.18	0.81123	0.602189	0.97937	3	Neutral	0.517208	Neutral	4	Benign	0.98	0.72	Neutral	7	Neutral	0.74
10	90966785	C	T	17.55	0.18	0.13901	0.666236	0.918338	2	Neutral	0.816098	Neutral	2	Possibly damaging	0.958	0.34	Non-neutral	0	Neutral	0.6
1	75038648	G	A	3.292	0.18	0.01676	0.547309	0.907907	2	Neutral	0.672341	Neutral	4	Benign	0.996	0.24	Neutral	3	Neutral	0.75
3	164750368	G	A	0.012	0.31	0.01302	0.573888	0.855691	2	Deleterious	0.0264148	Neutral	8	Benign	0.988	0.62	Neutral	4	Neutral	0.65
2	170428379	C	T	16.2	0.42	0.0456	0.732669	0.198253	2	Neutral	0.996504	Neutral	9	Benign	1	1	Neutral	5	Neutral	0.75
11	66811286	C	G	21.9	0.66	0.97669	0.658983	0.993335	3	Neutral	0.46176	Neutral	3	Benign	0.822	0.39	Neutral	3	Neutral	0.74
9	137808283	C	T	20.9	0.14	0.06773	0.547309	0.985783	2	Deleterious	0.0227458	Neutral	0	Benign	0.884	0.27	Neutral	1	Neutral	0.63
17	37792096	C	A	12.99	0.29	0.02151	0	0.934686	1	Neutral	0.0822136	Neutral	7	Benign	0.724	0.02	Neutral	1	Deleterious	0.52
12	19408017	G	A	24.9	0.79	0.97676	0.709663	0.999574	4	Neutral	0.896869	Disease	4	Benign	1	0.02	Non-neutral	3	Deleterious	0.61
9	106880515	G	T	28.1	0.58	0.98892	0.724815	0.997639	4	Neutral	0.33723	Disease	2	Possibly damaging	0.602	0.01	Neutral	2	Deleterious	0.55
19	21131873	A	G	0.001	0.3	0.00188	0.670488	0.305998	1	Neutral	0.115727	Neutral	6	Benign	0.998	0.33	Neutral	1	Neutral	0.75
19	53454237	T	C	9.545	0.27	0.2465	0.608884	0.996716	1	Neutral	0.534127	Neutral	4	Benign	0.98	0.01	Neutral	0	Neutral	0.63
2	242429428	G	A	9.208	0.41	0.49528	0.489635	0.979202	3	Neutral	0.374423	Neutral	7	Benign	0.964	0.04	Neutral	0	Neutral	0.65
20	62365080	G	T	19.4	0.35	0.97237	0.743671	0.99426	4	Deleterious	0.0543502	Neutral	3	Benign	0.346	0.34	Non-neutral	1	Neutral	0.6
19	55597247	A	T	14.9	0.27	0.11461	0.851219	0.976264	2	Neutral	0.816798	Neutral	2	Benign	0.926	0.06	Neutral	0	Neutral	0.74
7	129691167	C	T	10.94	0.59	0.00232	0.504199	0.803791	2	Neutral	0.952313	Neutral	9	Benign	0.998	0.31	Neutral	5	Neutral	0.74
8	21892053	A	G	0.536	0.15	0.00258	0.667671	0.584311	1	Neutral	1	Neutral	7	Benign	0.998	0.08	Neutral	4	Neutral	0.75
8	53077749	G	A	33	0.42	0.99248	0.475579	0.99928	3	Deleterious	0.00015035	Disease	5	Benign	1	0	Non-neutral	2	Deleterious	0.87
6	31919018	T	G	10.07	0.36	0.0352	0.486962	0.697426	3	Neutral	0.700094	Neutral	6	Benign	1	0.87	Neutral	5	Neutral	0.75
8	29990201	C	T	10.56	0.21	0.0105	0.547309	0.618449	1	Neutral	0.708481	Neutral	5	Benign	0.994	0.56	Neutral	4	Neutral	0.74
1	19582545	G	A	22	0.48	0.98902	0.254355	0.99913	4	Neutral	0.152032	Disease	3	Benign	0.97	0.02	Neutral	1	Neutral	0.6
1	110466624	A	G	2.083	0.17	0.28288	0.658983	0.496271	2	Neutral	0.301495	Neutral	9	Benign	0.982	0.72	Neutral	3	Neutral	0.74
11	75563021	T	C	26.8	0.62	0.93402	0.602189	0.997449	4	Neutral	0.0916987	Disease	8	Benign	0.998	0.02	Non-neutral	5	Deleterious	0.87
2	119727793	C	G	0.001	0.36	0.03957	0.547309	0.51481	2	Neutral	0.113826	Neutral	8	Benign	1	0.68	Neutral	1	Neutral	0.75
5	78964826	C	T	22.8	0.68	0.78427	0.696353	0.984554	4	Neutral	0.401007	Neutral	8	Benign	0.996	0.2	Neutral	3	Neutral	0.75
14	32623861	G	A	28.3	0.72	0.97396	0.732669	0.999167	4	Neutral	0.611433	Neutral	0	Benign	0.882	0.01	Non-neutral	1	Neutral	0.6
17	7127674	G	A	14.39	0.64	0.94304	0.702456	0.737369	3	Neutral	0.105257	Neutral	3	Benign	0.978	0.12	Neutral	3	Neutral	0.75
19	54803567	A	G	0.001	0.2	7e-05	0.547309	0.0320077	1	Neutral	0.717588	Neutral	2	Benign	1	1	Neutral	7	Neutral	0.75
5	148695816	T	C	17.26	0.23	0.2435	0.658983	0.995877	2	Neutral	0.146478	Disease	3	Benign	0.998	0.12	Neutral	5	Neutral	0.63
15	48493597	G	T	22	0.55	0.9899	0.446627	0.995865	2	Deleterious	3.54983e-05	Neutral	0	Possibly damaging	0.994	0.09	Non-neutral	0	Deleterious	0.61
8	134125846	C	T	28.9	0.31	0.71413	0.547309	0.999046	1	Deleterious	0.0648147	Disease	6	Benign	1	0.1	Neutral	0	Deleterious	0.61
2	85892782	C	T	15.75	0.46	0.056	0	0.943548	1	Neutral	0.917668	Neutral	7	Benign	0.888	0.51	Neutral	6	Neutral	0.74
6	32946029	G	A	13.19	0.35	0.44858	0.702456	0.993296	2	Neutral	0.516135	Neutral	8	Benign	0.998	0.56	Neutral	5	Neutral	0.75
5	6751227	G	A	0.778	0.19	0.17864	0.723133	0.47084	2	Neutral	0.978528	Neutral	9	Benign	1	1	Neutral	6	Neutral	0.75
11	19955433	A	T	26.7	0.22	0.97991	0.724815	0.995795	3	Deleterious	0.00429785	Neutral	2	Benign	1	0	Neutral	2	Deleterious	0.61
5	102523050	A	G	20.3	0.58	0.88862	0.618467	0.67294	2	Neutral	0.460532	Neutral	9	Benign	0.79	1	Neutral	7	Neutral	0.75
19	45175950	C	G	17.13	0.26	0.75502	0.696353	0.987855	2	Deleterious	0.0348512	Neutral	5	Possibly damaging	0.222	0.02	Neutral	1	Neutral	0.6
11	6625566	A	G	22.9	0.57	0.78507	0.52208	0.981856	4	Neutral	0.828493	Neutral	6	Benign	0.28	0.03	Neutral	1	Neutral	0.74
19	24309495	T	G	20.7	0.37	0.09957	0.608884	0.982338	2	Neutral	0.223639	Neutral	6	Possibly damaging	0.982	0.02	Neutral	3	Neutral	0.6
1	249211925	G	A	11.36	0.61	0.00738	0.608884	0.961381	2	Neutral	0.640007	Neutral	8	Benign	0.992	0.07	Neutral	4	Neutral	0.74
1	159778867	C	T	12.2	0.16	0.02701	0.573888	0.977551	1	Neutral	0.541906	Disease	1	Benign	0.814	0.7	Neutral	7	Neutral	0.68
22	40364122	G	A	16.25	0.42	0.5806	0.547309	0.9982	3	Neutral	0.844365	Neutral	6	Possibly damaging	0.996	0.42	Non-neutral	0	Neutral	0.6
5	80476005	A	G	12.9	0.32	0.82161	0.675528	0.886399	3	Neutral	0.194773	Neutral	6	Benign	0.982	0.38	Neutral	0	Neutral	0.74
11	6624660	G	A	9.793	0.28	0.05476	0.52208	0.816164	3	Neutral	0.961009	Neutral	9	Benign	0.984	0.09	Neutral	1	Neutral	0.74
16	72831629	G	A	23.7	0.73	0.94777	0.658983	0.800956	4	Neutral	0.421077	Neutral	5	Benign	0.26	0	Non-neutral	1	Deleterious	0.51
9	13110000	G	C	15.88	0.56	0.86942	0.743671	0.942316	3	Neutral	0.339267	Neutral	9	Benign	0.498	0.44	Neutral	5	Neutral	0.83
3	122667532	C	T	15.36	0.47	0.53232	0.854111	0.97923	1	Neutral	0.255483	Neutral	8	Benign	0.998	0.2	Neutral	0	Neutral	0.75
22	32754103	A	T	0.122	0.18	0.00023	0.547309	0.280985	1	Neutral	0.63315	Neutral	8	Benign	1	0.63	Non-neutral	0	Neutral	0.63
19	17160894	G	A	4.337	0.23	0.01017	0.723133	0.781776	2	Neutral	0.307561	Neutral	8	Benign	0.966	0.28	Neutral	6	Neutral	0.74
1	75038603	C	T	14.21	0.16	0.02619	0.547309	0.984516	2	Neutral	0.240545	Neutral	8	Benign	0.82	0.1	Neutral	3	Neutral	0.74
15	70960222	G	A	10.55	0.24	0.13453	0.709663	0.860119	2	Neutral	0.52535	Neutral	9	Benign	1	0.24	Neutral	6	Neutral	0.75
12	8325226	A	C	10.12	0.26	0.0059	0.573888	0.59819	1	Neutral	0.0816948	Neutral	4	Benign	0.988	0.26	Neutral	2	Neutral	0.65
2	69053166	A	G	3.092	0.27	0.39974	0.602189	0.980777	2	Deleterious	0.00553316	Neutral	8	Benign	0.998	0.09	Neutral	5	Neutral	0.63
7	44579179	C	A	22.8	0.18	0.10797	0.547309	0.586239	2	Neutral	0.374707	Disease	5	Benign	0.974	0.03	Non-neutral	1	Deleterious	0.65
11	118656903	G	C	25.7	0.26	0.99278	0.702456	0.994147	3	Neutral	0.116879	Neutral	7	Benign	0.426	0.03	Neutral	0	Neutral	0.74
5	79854826	A	G	12.13	0.46	0.78876	0.658983	0.887819	3	Neutral	0.386137	Neutral	7	Benign	1	0.43	Neutral	5	Neutral	0.75
11	59857175	T	C	0.003	0.24	0.01714	0.573888	0.35573	1	Neutral	0.616118	Neutral	7	Benign	1	0.11	Neutral	0	Neutral	0.75
8	22995702	G	C	0.001	0.31	0.00231	0.702456	0.124834	2	Neutral	0.998973	Neutral	9	Benign	1	1	Neutral	3	Neutral	0.75
5	108207888	T	G	24.1	0.65	0.90817	0.547309	0.997616	4	Neutral	0.389113	Neutral	2	Possibly damaging	0.652	0	Neutral	4	Neutral	0.6
8	68102977	T	C	13.8	0.24	0.0097	0.643519	0.655117	1	Neutral	0.743832	Neutral	8	Benign	0.996	0.84	Non-neutral	2	Neutral	0.63
8	99153094	G	C	22.7	0.43	0.98169	0.743671	0.9966	3	Neutral	0.594118	Neutral	8	Benign	0.85	0.13	Neutral	3	Neutral	0.74
8	72967827	C	T	20.6	0.5	0.97325	0.573888	0.999318	2	Neutral	0.999524	Neutral	5	Benign	1	0	Neutral	7	Neutral	0.63
12	49951377	C	T	21.3	0.39	0.70145	0.536957	0.99785	2	Neutral	0.896783	Neutral	6	Benign	0.956	0.18	Non-neutral	1	Neutral	0.6
9	15186958	C	T	23.3	0.29	0.6061	0.658983	0.976144	2	Neutral	0.688042	Neutral	9	Benign	0.928	0.1	Neutral	7	Neutral	0.74
8	143999075	T	A	5.018	0.16	0.00312	0.547309	0.821409	2	Neutral	0.872307	Neutral	8	Benign	1	0.98	Neutral	6	Neutral	0.75
2	23980698	T	C	12.93	0.61	0.04806	0.679469	0.671475	0	Neutral	0.733986	Neutral	9	Benign	1	1	Neutral	6	Neutral	0.75
6	52141266	G	A	26.4	0.31	0.9384	0.702456	0.998657	4	Neutral	0.905011	Disease	2	Benign	0.91	0	Neutral	1	Neutral	0.6
1	155706776	G	A	22	0.72	0.95591	0.724815	0.994172	2	Neutral	0.787991	Neutral	6	Benign	0.746	0.1	Neutral	2	Neutral	0.74
8	11415492	A	C	18.18	0.4	0.98867	0.547309	0.997794	4	Neutral	0.219243	Neutral	3	Benign	0.024	0	Neutral	1	Neutral	0.63
7	2853969	G	C	1.195	0.16	0.01205	0.527494	0.779203	3	Neutral	0.944712	Neutral	8	Benign	0.988	0.94	Neutral	5	Neutral	0.74
9	86518269	A	T	13.19	0.38	0.63858	0.408882	0.976884	2	Neutral	0.208563	Neutral	1	Benign	0.396	0.12	Neutral	0	Neutral	0.83
7	75172253	T	C	22.4	0.6	0.94072	0.724815	0.998156	3	Neutral	0.146906	Neutral	3	Benign	0.49	0	Neutral	4	Neutral	0.75
1	226048680	T	C	20.8	0.54	0.96173	0.702456	0.986415	3	Neutral	0.335283	Neutral	2	Benign	0.626	0.17	Neutral	4	Neutral	0.74
15	82575317	T	C	2.33	0.25	0.13094	0.602189	0.993576	1	Neutral	0.0957677	Neutral	1	Benign	0.758	0.03	Neutral	6	Neutral	0.6
19	45183603	G	T	0.53	0.26	0.00492	0.658983	0.476016	2	Neutral	0.976953	Neutral	7	Benign	0.992	0.9	Neutral	4	Neutral	0.74
[truncated: 17,621 more rows]

## Sheet: test_synonymous_deleterious
Chromosome	Position	Reference allele	Observed allele	CADD score	GWAVA score	FATHMM score	FitCons score	DANN score	FunSeq2 score
[truncated: 15,819 more rows]

[truncated: 13 more sheets: test_synonymous_neutral, test_nonsense_deleterious, test_nonsense_neutral, train_regulatory_deleterious, train_regulatory_neutral, train_splicing_deleterious, train_splicing_neutral, train_missense_deleterious, train_missense_neutral, train_synonymous_deleterious, train_synonymous_neutral, train_nonsense_deleterious, train_nonsense_neutral]
