# Supplementary material for: PredictSNP2: A Unified Platform for Accurately Evaluating SNP Effects by Exploiting the Different Characteristics of Variants in Distinct Genomic Regions
Source: PLOS journal article supplement (doi:10.1371/journal.pcbi.1004962), 2016-05-25
Supplement: S10 (10.1371/journal.pcbi.1004962.s010) [file journal.pcbi.1004962.s010]

**S1 Table. Principles and training datasets of six evaluated prediction tools.**

| Tool name | Version                    | Principle                 | Training dataset                                                                              | Reference |
|-----------|----------------------------|---------------------------|-----------------------------------------------------------------------------------------------|-----------|
| CADD      | 1.2                        | Logistic regression       | High-frequency human-derived variants<br>14.7 million observed / 14.7 million simulated       | [24]      |
| DANN      | 2014-11-14                 | Deep neural network       | High-frequency human-derived variants<br>14.7 million observed / 14.7 million simulated       | [26]      |
| FATHMM    | 2015-02-25                 | Support vector machine    | HGMD (heritable germline), 1000 Genome (MAF $\geq$ 1%)<br>12,438 deleterious / 24,064 neutral | [27]      |
| FitCons   | 1.01<br>Cell type: H1 hESC | Evolutionary fingerprints | No training dataset                                                                           | [28]      |
| FunSeq2   | 2.1.2                      | Weighted scoring system   | No training dataset                                                                           | [32]      |
| GWAVA     | 1.0<br>Model: region       | Random forest             | HGMD (regulatory), 1000 Genome (MAF $\geq$ 1%)<br>1,614 deleterious / 5,027 neutral           | [25]      |

CADD – Combined Annotation Dependent Depletion, DANN – Deleterious Annotation of Genetic Variants using Neural Networks, FATHMM – Functional Analysis through Hidden Markov Models, FitCons – Fitness Consequences of Functional Annotation, GWAVA – Genome-Wide Annotation of Variants, hESC – human embryonic stem cells, HGMD – The Human Gene Mutation Database, MAF – Minor allele frequency
