# Supplementary material for: PredictSNP2: A Unified Platform for Accurately Evaluating SNP Effects by Exploiting the Different Characteristics of Variants in Distinct Genomic Regions
Source: PLOS journal article supplement (doi:10.1371/journal.pcbi.1004962), 2016-05-25
Supplement: S21 (10.1371/journal.pcbi.1004962.s021) [file journal.pcbi.1004962.s021]

**PredictSNP2: A unified platform for accurately evaluating SNP effects by exploiting the different characteristics of variants in distinct genomic regions**

**User guide**

**Contact:**

Loschmidt Laboratories,

Department of Experimental Biology and Research Centre for Toxic Compounds in the Environment,

Faculty of Science, Masaryk University,

Kamenice 5, Bld. A13, 625 00 Brno, Czech Republic

Webpage: <http://loschmidt.chemi.muni.cz>

E-mail: [predictsnp@gmail.com](mailto:predictsnp@gmail.com)

**Recommended Citation:**

Bendl, J., Musil, M., Stourac, J., Zendulka, J., Damborsky, J., Brezovsky, J., 2015: **PredictSNP2: A unified platform for accurately evaluating SNP effects by exploiting the different characteristics of variants in distinct genomic regions.** Submitted to publication.

© **Copyright 2011-2016** Loschmidt Laboratories, Department of Experimental Biology and Research Centre for Toxic Compounds in the Environment, Faculty of Science, Masaryk University, Brno, Czech Republic

# Contents

|                 |   |
|-----------------|---|
| 1. Introduction | 4 |
| 2. Input page   | 5 |
| 3. Output page  | 7 |
| 4. Example      | 9 |

# 1. INTRODUCTION

The precise delineation of phenotypically causal variants plays a key role in providing accurate personalized diagnosis, prognosis, and treatment of inherited diseases. Several computational tools have already been developed for this purpose. The PredictSNP2 is a consensus classifier combining five best performing prediction methods to provide more accurate and robust alternative to the predictions delivered by individual integrated tools. The predictions from the computational tools are supplemented by experimental annotations from eight databases. The web server is freely available to the academic community at <http://loschmidt.chemi.muni.cz/predictsnp2>.

## Integrated prediction tools

| Tool name | Version              | Principle               | Training dataset                                                                              |
|-----------|----------------------|-------------------------|-----------------------------------------------------------------------------------------------|
| CADD      | 1.2                  | Logistic regression     | High-frequency human-derived variants<br>14.7 million observed / 14.7 million simulated       |
| DANN      | 2014-11-14           | Deep neural network     | High-frequency human-derived variants<br>14.7 million observed / 14.7 million simulated       |
| FATHMM    | 2015-02-25           | Support vector machine  | HGMD (heritable germline), 1000 Genome (MAF $\geq$ 1%)<br>12,438 deleterious / 24,064 neutral |
| FunSeq2   | 2.1.2                | Weighted scoring system | No training dataset                                                                           |
| GWAVA     | 1.0<br>model: region | Random forest           | HGMD (regulatory), 1000 Genome (MAF $\geq$ 1%)<br>1,614 deleterious / 5,027 neutral           |

CADD – Combined Annotation Dependent Depletion, DANN – Deleterious Annotation of Genetic Variants using Neural Networks, FATHMM – Functional Analysis through Hidden Markov Models, GWAVA – Genome-Wide Annotation of Variants, HGMD – The Human Gene Mutation Database, MAF – Minor allele

## Referenced databases and on-line services

| Tool resource          | Description                                                                                                                                                                                     | Content                                 |
|------------------------|-------------------------------------------------------------------------------------------------------------------------------------------------------------------------------------------------|-----------------------------------------|
| ClinVar                | Database of variations containing the interpretations of the relationship to human health and the evidence supporting each interpretation.                                                      | Variations: 158,850<br>[September 2015] |
| dbSNP                  | Database of short genetic variations                                                                                                                                                            | Variations: 149,735,377<br>[build 144]  |
| Ensembl Genome browser | Genome browser providing an interface to display the information from various biological databases for selected position in the genome                                                          | -                                       |
| GenBank                | Database of all publicly available nucleotide sequences and their protein translation                                                                                                           | -                                       |
| HaploReg               | Database of annotations of variations on haplotype blocks, such as predicted chromatin state, sequence conservation across mammals, the effect on regulatory motif and the effect of expression | 52,053,803                              |
| OMIM                   | Database of variations and genes associated with inherited disorders                                                                                                                            | Variations: 24,367<br>[September 2015]  |
| RegulomeDB             | Database of annotations of variations in the intergenic regions using gene expression, ENCODE and data from published articles.                                                                 | 61,397,379                              |
| UCSC Genome browser    | Genome browser providing an interface to display the information from various biological databases for selected position in the genome                                                          | -                                       |

## 2. INPUT PAGE

The process of submitting the job to PredictSNP server consists of following steps:

### 1. INPUT section

- a. Upload the file or insert the list of genetic variants in one of supported formats - see table below:

|        |                                                                                                                                                                                                                  |
|--------|------------------------------------------------------------------------------------------------------------------------------------------------------------------------------------------------------------------|
| Simple | Definition: chromosome,position_start,[position_end],reference_allele,alternative_allele<br>Example – chromosome coordinates: chr14, 51062341, G, C                                                              |
| VCF    | References: <a href="#">VCF format specification</a> , <a href="#">journal article</a><br>Example – chromosome coordinates: chr14    51062341    .    G    C    .    .    .                                      |
| GVF    | References: <a href="#">GVF format specification</a> , <a href="#">journal article</a><br>Example – chromosome coordinates: chr18    .    SNV    21118528    21118528    .    +<br>Reference_seq=G;Variant_seq=C |
| HGVS   | References: <a href="#">HGVS format specification</a> , <a href="#">journal article</a><br>Example – RefSeq coordinates: NM_000271.4:c.3019G>C                                                                   |

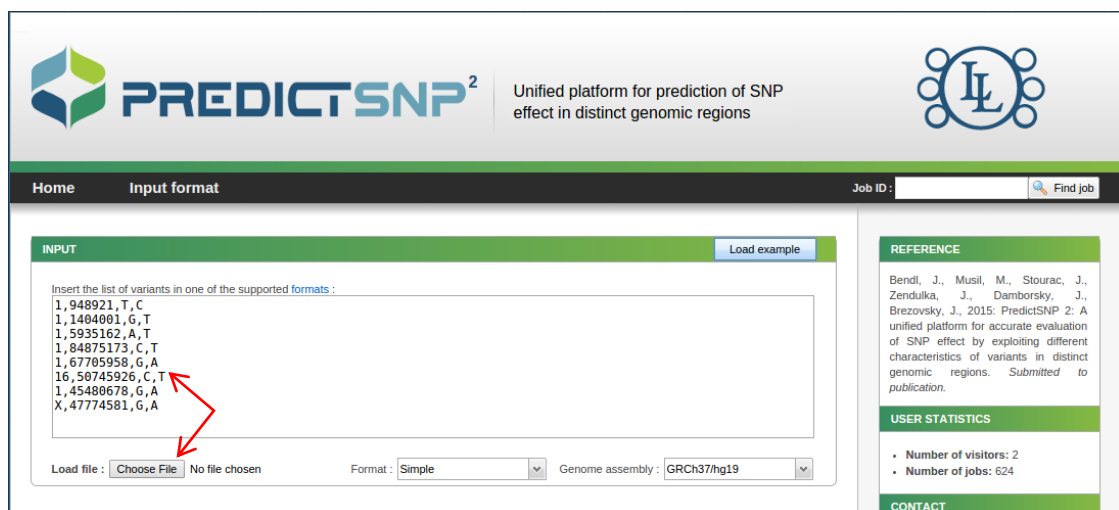

- b. Select *format* and *genome assembly* of your input.

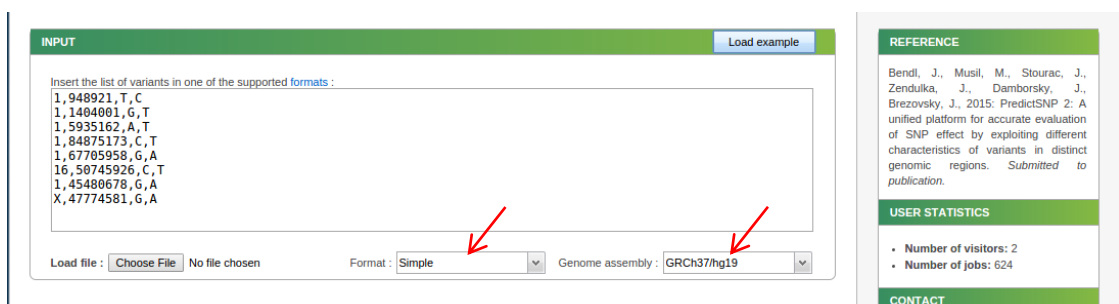

2. **JOB INFO** section (OPTIONALLY): Provide a job title and e-mail address on which the information about the job will be sent. The number of jobs waiting in the queue is reported and waiting time is estimated based on the number of variants already submitted for evaluation.

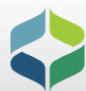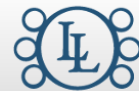**INPUT**[Load example](#)

Insert the list of variants in one of the supported [formats](#) :

```
6,1613076,A,T
1,66075952,G,C
1,201328373,G,A
18,48575659,A,G
3,37067050,A,G
17,41209069,C,T
11,5248388,G,A
X,138642995,T,C
18,21118528,G,C
13,84452863,C,T
```

Load file :  No file chosen

Format :

Genome assembly :

**JOB INFO**

Job title (optional) :

E-mail (optional) :

Jobs in queue: 0

Estimated waiting time: 0s

**REFERENCE**

Bendl, J., Musil, M., Stourac, J., Zedulka, J., Damborsky, J., Brezovsky, J., 2015: PredictSNP 2: A unified platform for accurate evaluation of SNP effect by exploiting different characteristics of variants in distinct genomic regions. *Submitted to publication*.

**USER STATISTICS**

- Number of visitors: 52
- Number of jobs: 957

**CONTACT**

Loschmidt Laboratories

- [predictsnp@sci.muni.cz](mailto:predictsnp@sci.muni.cz)
- <http://loschmidt.chemi.muni.cz>

**RESOURCES**

Mendelian diseases dataset

- A benchmark database for mendelian diseases

### 3. OUTPUT PAGE

Upon successful submission of a job, the user is redirected to the output page, where the following information is available:

1. **JOB INFORMATION** section – provides information whether the job is running or waiting in the queue. It also shows *Job title* and *Job ID* that can be used to access the job via search panel located in the header of the page. NOTE: Alternatively, you can either bookmark the whole page to access the job later, or provide an e-mail address on the input page.

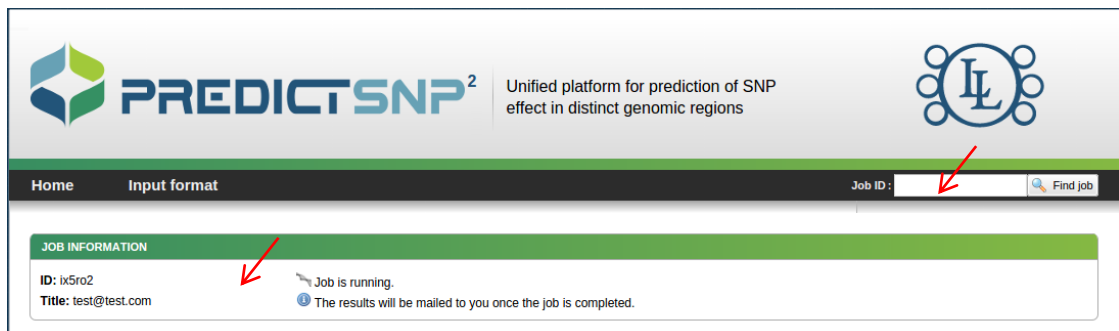

2. **RESULTS** section – once the job is finished, all results are shown in the summary table that is divided into three sub-sections: Input, Prediction tools and Databases. Input subsection contains the definitions of variants and corresponding regions and region functions detected by ANNOVAR. The predicted effect of PredictSNP consensus and individual tools is color-coded: neutral variants are in green, deleterious variants in red and undecided variants in gray. The normalized confidence of the tools is represented as a percentage corresponding to the observed accuracy measured for similar scores on the real data. The "-" symbol indicates that the respective variant was not properly evaluated by a given tool while "?" symbol indicates that the reported tool score has low confidence. When the mouse cursor is moved over any cell in the result table, a raw score of the corresponding tool is shown in a tooltip. The availability of database annotation for each variant is indicated by  symbol. By clicking on the symbol, users are redirected to the original database record (mouse cursor over this symbol shows the description of the database). For any missense variants, the users can start the calculation of PredictSNP1 integrating six protein-based predictors by ticking the corresponding checkboxes in the last column of the table and clicking *Send to PredictSNP1* button below the table. Additionally, the users can switch between chromosome coordinates in *Genome assembly* box (GRCh37/hg19 and GRCh38/hg38 are currently supported).  
  
If the number of variants for analysis is larger than 50, only those predicted as the most deleterious according to the user-selected tool are shown in the result table (box *Prioritize by tool*; implicitly, PredictSNP2 tool is selected). The selection can be narrowed down to the specific category of variants, such as regulatory, splicing, missense, synonymous and nonsense subsets (box *Filter by category*).

| RESULTS                                                                                                                                                                                                                                                                                            |          |                 | XX % expected accuracy           |      |      |        |         |       |                               |         |         |      |          |          |                     |         |             | annotation |
|----------------------------------------------------------------------------------------------------------------------------------------------------------------------------------------------------------------------------------------------------------------------------------------------------|----------|-----------------|----------------------------------|------|------|--------|---------|-------|-------------------------------|---------|---------|------|----------|----------|---------------------|---------|-------------|------------|
| Input                                                                                                                                                                                                                                                                                              |          |                 | Prediction tools                 |      |      |        |         |       | Databases                     |         |         |      |          |          |                     |         |             |            |
| Variant                                                                                                                                                                                                                                                                                            | Region   | Region function | PredictSNP2                      | CADD | DANN | FATHMM | FunSeq2 | GWAVA | dbSNP                         | GenBank | Clinvar | OMIM | Regulome | HaploReg | UCSC                | Ensembl | PredictSNP1 |            |
| 6:1613076,A→T                                                                                                                                                                                                                                                                                      | UTR3     |                 | 97 %                             | 79 % | 75 % | 91 %   | 76 %    | 78 %  |                               |         |         |      |          |          |                     |         |             |            |
| 13:84452863,C→T                                                                                                                                                                                                                                                                                    | UTR3     |                 | 97 %                             | 83 % | 89 % | 94 %   | ?       | 86 %  |                               |         |         |      |          |          |                     |         |             |            |
| 1:45480678,G→A                                                                                                                                                                                                                                                                                     | exonic   | synonymous      | 93 %                             | 87 % | 87 % | 97 %   |         |       |                               |         |         |      |          |          |                     |         |             |            |
| 18:48575659,A→G                                                                                                                                                                                                                                                                                    | intronic |                 | 91 %                             | 79 % | 62 % | 92 %   | 67 %    | 80 %  |                               |         |         |      |          |          |                     |         |             |            |
| 11:5248388,G→A                                                                                                                                                                                                                                                                                     | upstream |                 | 91 %                             | 86 % | 66 % | 91 %   | 64 %    | 86 %  |                               |         |         |      |          |          |                     |         |             |            |
| 20:35532559,C→A                                                                                                                                                                                                                                                                                    | splicing |                 | 89 %                             | 69 % | 72 % | 69 %   | 65 %    | ?     |                               |         |         |      |          |          |                     |         |             |            |
| 18:21118528,G→C                                                                                                                                                                                                                                                                                    | exonic   | nonsynonymous   | 87 %                             | 80 % | 62 % | 83 %   | 61 %    | ?     |                               |         |         |      |          |          |                     |         |             |            |
| 16:31202373,C→T                                                                                                                                                                                                                                                                                    | exonic   | stopgain        | 57 %                             | 53 % | 54 % | 69 %   | 65 %    | 68 %  |                               |         |         |      |          |          |                     |         |             |            |
| 9:6534707,C→T                                                                                                                                                                                                                                                                                      | splicing |                 | 58 %                             | 69 % | 72 % | 69 %   | 64 %    | 77 %  |                               |         |         |      |          |          |                     |         |             |            |
| 5:131924564,C→T                                                                                                                                                                                                                                                                                    | exonic   | stopgain        | 58 %                             | 53 % | 51 % | 64 %   | 77 %    | 76 %  |                               |         |         |      |          |          |                     |         |             |            |
| Filter by category : All                                                                                                                                                                                                                                                                           |          |                 | Prioritize by tool : PredictSNP2 |      |      |        |         |       | Genome assembly : GRCh37/hg19 |         |         |      |          |          | Send to PredictSNP1 |         |             |            |
| <div>Prediction: deleterious<br/>Expected accuracy: 94 %<br/>Tool score: 0.97839</div> <div>Clinical significance:<br/>Pathogenic<br/>Clinvar is a database of variations containing the interpretations of the relationship to human health and the evidence supporting each interpretation</div> |          |                 |                                  |      |      |        |         |       |                               |         |         |      |          |          |                     |         |             |            |

3. **DOWNLOAD** section – the results are available for download as VCF or PDF file. Note that a PDF file is generated for cases with less than 1,000 variants. In the case of problems, all errors are logged and accessible via *Error log* button.

**DOWNLOAD (ASSEMBLY GRCh37/HG19)**

VCF File
PDF File
Error log



## 4. EXAMPLE

The PredictSNP2 server provides an embedded example, which can be raised by pressing *Load example* button in the INPUT section at the input page.

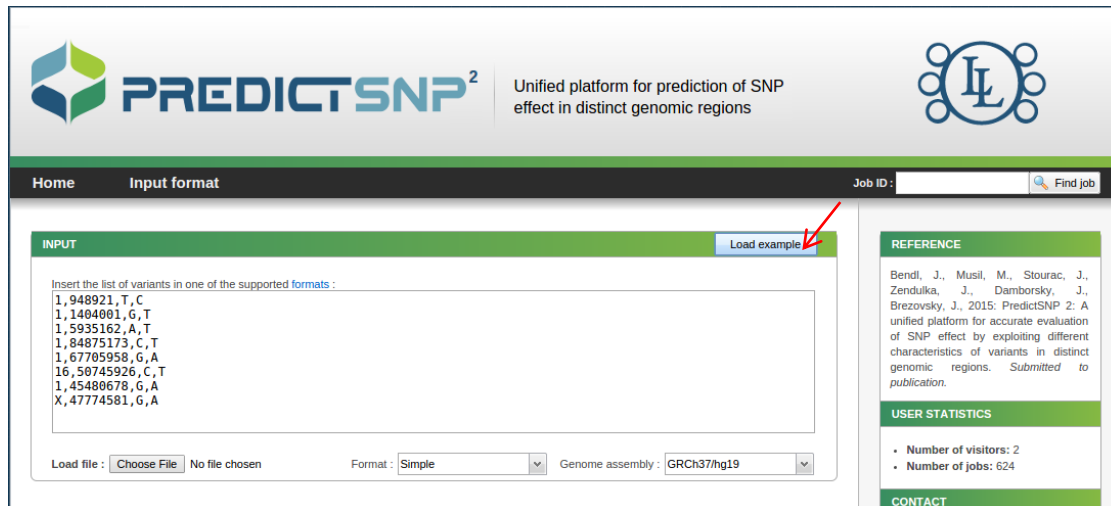

The screenshot displays the PredictSNP2 web application interface. At the top, the logo 'PREDICTSNP<sup>2</sup>' is shown alongside the tagline 'Unified platform for prediction of SNP effect in distinct genomic regions'. A navigation bar includes 'Home' and 'Input format' tabs. The main content area is divided into two columns. The left column, titled 'INPUT', contains a text box with a list of 18 variants: 1,948921,T,C; 1,1484801,G,T; 1,5935162,A,T; 1,84875173,C,T; 1,67785959,G,A; 16,58745926,C,T; 1,45488678,G,A; and X,47774581,G,A. Below this text box are fields for 'Load file' (with a 'Choose File' button), 'Format' (set to 'Simple'), and 'Genome assembly' (set to 'GRCh37/hg19'). A red arrow points to the 'Load example' button in the top right corner of the 'INPUT' section. The right column contains a 'REFERENCE' section with a citation and a 'USER STATISTICS' section showing 'Number of visitors: 2' and 'Number of jobs: 624'. A 'CONTACT' section is at the bottom right.

This loads the sequence of 18 variants located on 15 different chromosomes and 5 different regions (6 regulatory variants, 2 splicing variants, 3 missense variants, 4 synonymous variants and 3 nonsense variants). The experimental annotations from ClinVar database are available for 16 variants, out of which 9 variants are recognized as likely pathogenic / pathogenic and 7 variants as benign. The results of analysis provided by PredictSNP2 platform together with ClinVar annotations are summarized in the table on the next page. As can be seen from the table, the predictions of PredictSNP2 consensus score are also frequently in the correspondence with the experimental annotations. The variants, that are not annotated and at the same time are frequently predicted as deleterious with high confidence, might represent an interesting choice for an experimental study. Conversely, the mutations predominantly predicted as neutral might be deprioritized from a further study.

| Chromosome | Position  | rs# identifier | Reference allele | Observed allele | ANNOVAR annotation    | ClinVar           | Affected gene | Disease association          | Prediction of tools <sup>a</sup> |      |      |        |         |       |
|------------|-----------|----------------|------------------|-----------------|-----------------------|-------------------|---------------|------------------------------|----------------------------------|------|------|--------|---------|-------|
|            |           |                |                  |                 |                       |                   |               |                              | PredictSNP2                      | CADD | DANN | FATHMM | FunSeq2 | GWAVA |
| 6          | 1613076   | rs35717904     | A                | T               | UTR3                  | Pathogenic        | FOXC1         | -                            | 97 %                             | 79 % | 75 % | 91 %   | 76 %    | 78 %  |
| 1          | 66075952  | rs1805094      | G                | C               | Exonic: nonsynonymous | Benign            | LEPR          | -                            | 89 %                             | 94 % | 83 % | 89 %   | 62 %    | 52 %  |
| 1          | 201328373 | rs121964857    | G                | A               | Exonic: nonsynonymous | Likely pathogenic | TNNT2         | Cardiomyopathy               | 65 %                             | 80 % | 73 % | 83 %   | 61 %    |       |
| 18         | 48575659  | rs377767327    | A                | G               | Intronic              | Pathogenic        | SMAD4         | Juvenile polyposis syndrome  | 91 %                             | 79 % | 62 % | 92 %   | 67 %    | 80 %  |
| 3          | 37067050  | rs11129748     | A                | G               | Intronic              | Benign            | MLH1          | -                            | 88 %                             | 86 % | 82 % | 93 %   | 68 %    | 64 %  |
| 11         | 5248388   | rs33941377     | G                | A               | Upstream              | Pathogenic        | HBB           | Beta thalassemia             | 91 %                             | 86 % | 66 % | 91 %   | 64 %    | 86 %  |
| X          | 138642995 | rs1800455      | T                | C               | Exonic: synonymous    | Benign            | F9            | -                            | 96 %                             | 95 % | 97 % | 73 %   | 93 %    | 54 %  |
| 18         | 21118528  | rs80358257     | G                | C               | Exonic: nonsynonymous | Pathogenic        | NPC1          | Niemann-Pick disease         | 87 %                             | 80 % | 62 % | 83 %   | 61 %    |       |
| 13         | 84452863  | rs191284403    | C                | T               | UTR3                  | Pathogenic        | SLITRK1       | Tourette syndrome            | 97 %                             | 83 % | 89 % | 94 %   |         | 86 %  |
| 9          | 6534707   | rs386833575    | C                | T               | Splicing              | Likely pathogenic | GLDC          | Non-ketotic hyperglycinemia  | 58 %                             | 69 % | 72 % | 69 %   | 64 %    | 77 %  |
| 20         | 35532559  | not available  | C                | A               | Splicing              | -                 | -             | -                            | 89 %                             | 69 % | 72 % | 69 %   | 65 %    |       |
| 16         | 31202373  | not available  | C                | T               | Exonic: stopgain      | -                 | -             | -                            | 57 %                             | 53 % | 54 % | 69 %   | 65 %    | 68 %  |
| 4          | 70898922  | rs17147990     | T                | A               | Exonic: stopgain      | Benign            | HTN3          | -                            | 81 %                             | 51 % | 84 % | 88 %   | 81 %    | 71 %  |
| 1          | 45480678  | rs121918062    | G                | A               | Exonic: synonymous    | Pathogenic        | UROD          | Porphyrria                   | 93 %                             | 87 % | 87 % | 97 %   | 93 %    | 54 %  |
| 10         | 124221276 | rs2293870      | G                | T               | Exonic: synonymous    | Benign            | HTRA1         | -                            | 93 %                             | 83 % | 87 % | 80 %   | 93 %    | 60 %  |
| 5          | 131924564 | rs373428259    | C                | T               | Exonic: stopgain      | Pathogenic        | RAD50         | Cancer-predisposing syndrome | 58 %                             | 53 % | 51 % | 64 %   | 77 %    | 76 %  |
| 2          | 47672475  | rs1981928      | T                | A               | Intronic              | Benign            | MSH2          | -                            | 77 %                             | 76 % | 54 % | 85 %   | 68 %    | 74 %  |
| 17         | 7127146   | rs35501596     | G                | A               | Exonic: synonymous    | Benign            | ACADVL        | -                            | 96 %                             | 79 % | 97 % | 72 %   | 93 %    | 68 %  |

<sup>a</sup> – predicted effect is color-coded: neutral variants are in green, deleterious variants in red, unknown / uncertain in gray
